# Supplementary material for: Transcriptome Screening of Long Noncoding RNAs and Their Target Protein-Coding Genes Unmasks a Dynamic Portrait of Seed Coat Coloration Associated with Anthocyanins in Tibetan Hulless Barley
Source: MDPI journal article supplement (doi:10.3390/ijms241310587), 2023-06-24
Supplement: s1 [file s1]

## **Supplementary Materials**

**Table S1.** Transcriptome-wide information for 9414 long noncoding RNA (lncRNA) transcripts in Tibetan hulless barley seed coats.

**Table S2.** Length distribution of lncRNAs in Tibetan hulless barley seed coats.

**Table S3.** The exon number of lncRNAs in Tibetan hulless barley seed coats.

**Table S4.** The number of homologous lncRNAs in Tibetan hulless barley seed coats compared with 39 other species.

**Table S5.** Homologous lncRNAs in Tibetan hulless barley seed coats compared with 39 other species.

**Table S6.** FPKM values of 9414 lncRNAs in Tibetan hulless barley seed coats.

**Table S7.** FPKM values of DElncRNAs in Tibetan hulless barley seed coats.

**Table S8.** *Cis*-regulated target DEPCGs and their DElncRNAs.

**Table S9.** DElncRNAs and their *cis*-regulated DEPCGs associated with anthocyanin synthesis.

**Table S10.** Expression pattern of *cis*-regulated DETFs and their DElncRNAs in the early milk and soft dough stages.

**Table S11.** *Trans*-regulated lncRNAs and their co-expressed transcription factors in the colour-forming module.

**Figure S1**

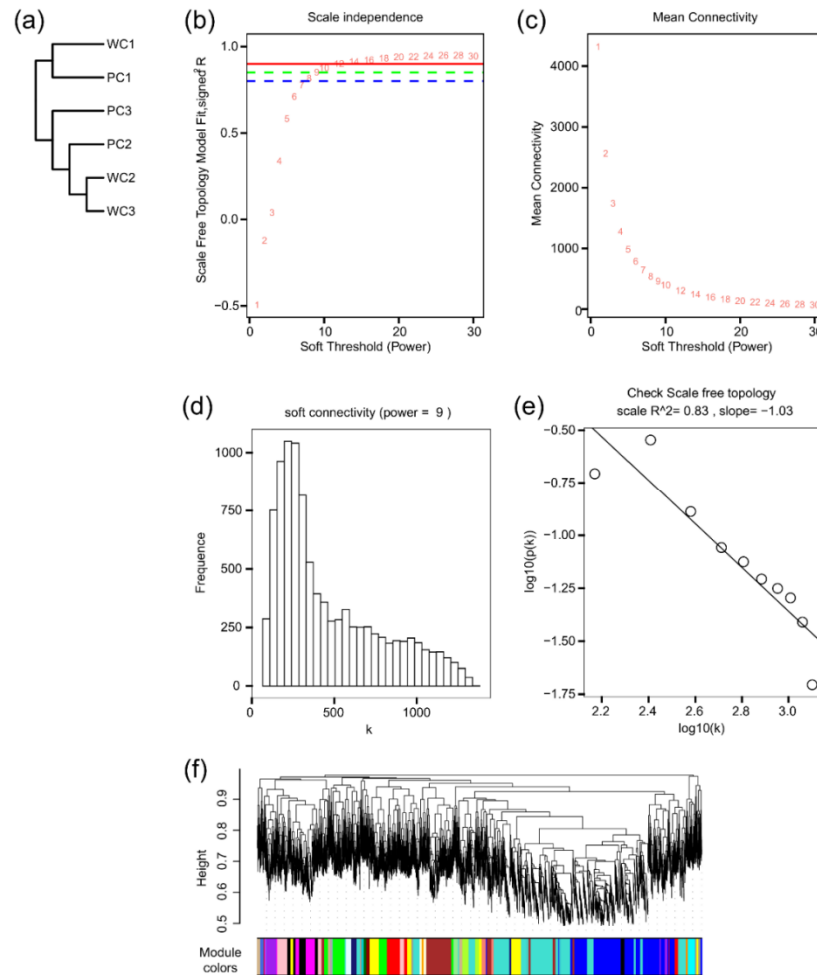

**Figure S1. Cluster dendrograms and modules in WGCNA.**

**(a)** Sample cluster of different developmental stages and kinds of seeds after data cleaning. No outlier sample group was found. **(b)** Scale independence state (power recommended = 9). **(c)** Mean connectivity and soft threshold. **(d)** Soft connectivity explained in terms of frequency and  $k$  value. **(e)** Scale-free topology (scale  $R^2 = 0.83$ , slope = -1.03). **(f)** Module divisions after dynamic tree cutting. Each module is given a colour label.
