# Supplementary material for: Transcriptome Screening of Long Noncoding RNAs and Their Target Protein-Coding Genes Unmasks a Dynamic Portrait of Seed Coat Coloration Associated with Anthocyanins in Tibetan Hulless Barley
Source: Int J Mol Sci. 2023 Jun 24;24(13):10587. doi: 10.3390/ijms241310587 (PMC10341697; doi:10.3390/ijms241310587)
Supplement: Supplementary file 1 [file ijms-24-10587-s001.zip]

Archive with 12 entries (12 files):
- ijms-2446821-supplementary.pdf
- Table S1. Transcriptome-wide information for 9414 long noncoding RNA (lncRNA) transcripts in Tibetan hulless barley seed coats.xlsx
- Table S10. Expression pattern of cis-regulated DETFs and their DElncRNAs in the early milk and soft dough stages.xlsx
- Table S11. Trans-regulated lncRNAs and their co-expressed transcription factors in the colour-forming module.xlsx
- Table S2. Length distribution of lncRNAs in Tibetan hulless barley seed coats.xlsx
- Table S3. The exon number of lncRNAs in Tibetan hulless barley seed coats.xlsx
- Table S4. The number of homologous lncRNAs in Tibetan hulless barley seed coats compared with 39 other species.xlsx
- Table S5. Homologous lncRNAs in Tibetan hulless barley seed coats compared with 39 other species.xlsx
- Table S6. FPKM values of 9414 lncRNAs in Tibetan hulless barley seed coats.xlsx
- Table S7. FPKM values of DElncRNAs in Tibetan hulless barley seed coats.xlsx
- Table S8. Cis-regulated target DEPCGs and their DElncRNAs.xlsx
- Table S9. DElncRNAs and their cis-regulated DEPCGs associated with anthocyanin synthesis.xlsx
