# Supplementary material for: Transcriptome Screening of Long Noncoding RNAs and Their Target Protein-Coding Genes Unmasks a Dynamic Portrait of Seed Coat Coloration Associated with Anthocyanins in Tibetan Hulless Barley
Source: Int J Mol Sci. 2023 Jun 24;24(13):10587. doi: 10.3390/ijms241310587 (PMC10341697; doi:10.3390/ijms241310587)
Supplement: Supplementary file 1 [file ijms-24-10587-s001.zip › Table S1. Transcriptome-wide information for 9414 long noncoding RNA (lncRNA) transcripts in Tibetan hulless barley seed coats.xlsx]

## Sheet: Sheet1
Table S1. Transcriptome-wide information for 9414 long noncoding RNA (lncRNA) transcripts in Tibetan hulless barley seed coats.
	LncRNA	Loci	Scaffold	Start	End	Strand	length	GC content	GC skew	Class code	Exon nomber
1	TCONS_00000111	XLOC_000034	SDOW01000001.1	8591760	8597013	+	675	0.454815	0.166124	o	2
2	TCONS_00000167	XLOC_000050	SDOW01000001.1	519080	520323	-	1167	0.482434	0.0657194	u	2
3	TCONS_00000186	XLOC_000060	SDOW01000001.1	1942739	1944195	-	1334	0.570465	-0.253614	u	2
4	TCONS_00000248	XLOC_000073	SDOW01000001.1	4494668	4499922	-	883	0.431484	0.144357	u	1
5	TCONS_00000249	XLOC_000073	SDOW01000001.1	4494668	4499922	-	359	0.629526	-0.20354	u	2
6	TCONS_00000293	XLOC_000086	SDOW01000001.1	7673291	7673857	-	449	0.45657	0.0243902	u	2
7	TCONS_00000299	XLOC_000089	SDOW01000001.1	8584554	8585143	-	286	0.716783	-0.00487805	u	2
8	TCONS_00000328	XLOC_000097	SDOW01000001.1	9779790	9785756	-	812	0.403941	-0.20122	u	1
9	TCONS_00000330	XLOC_000099	SDOW01000001.1	2857957	2858464	.	507	0.595661	-0.238411	u	1
10	TCONS_00000331	XLOC_000100	SDOW01000001.1	4494668	4499922	.	748	0.442513	0.141994	u	1
11	TCONS_00000360	XLOC_000108	SDOW01000002.1	723338	724280	+	828	0.455314	-0.066313	u	2
12	TCONS_00000361	XLOC_000108	SDOW01000002.1	723338	724280	+	820	0.453659	-0.0752688	u	2
13	TCONS_00000410	XLOC_000122	SDOW01000002.1	2913589	2914830	+	1167	0.540703	-0.0586371	o	2
14	TCONS_00000595	XLOC_000189	SDOW01000002.1	1726739	1730479	-	1451	0.442453	-0.0186916	u	2
15	TCONS_00000596	XLOC_000189	SDOW01000002.1	1726739	1730479	-	1702	0.442421	-0.00664011	u	3
16	TCONS_00000597	XLOC_000189	SDOW01000002.1	1726739	1730479	-	3245	0.399076	0.0131274	u	3
17	TCONS_00000598	XLOC_000189	SDOW01000002.1	1726739	1730479	-	2720	0.408824	0.00179856	u	4
18	TCONS_00000599	XLOC_000189	SDOW01000002.1	1726739	1730479	-	3666	0.393071	0.0242887	u	2
19	TCONS_00000601	XLOC_000189	SDOW01000002.1	1726739	1730479	-	3657	0.392945	0.0229645	u	2
20	TCONS_00000606	XLOC_000191	SDOW01000002.1	1945251	1946487	-	1067	0.518276	0.0198915	u	2
21	TCONS_00000607	XLOC_000191	SDOW01000002.1	1945251	1946487	-	1116	0.507168	0.0212014	u	2
22	TCONS_00000618	XLOC_000196	SDOW01000002.1	3159785	3165391	-	863	0.535342	0.112554	u	2
23	TCONS_00000639	XLOC_000204	SDOW01000002.1	4602087	4606848	-	730	0.415068	0.0231023	x	3
24	TCONS_00000658	XLOC_000212	SDOW01000002.1	5368538	5373211	-	311	0.575563	-0.00558659	u	5
25	TCONS_00000661	XLOC_000214	SDOW01000002.1	5935967	5940803	-	1122	0.516934	0.00689655	x	2
26	TCONS_00000662	XLOC_000214	SDOW01000002.1	5935967	5940803	-	374	0.644385	-0.0954357	x	2
27	TCONS_00000663	XLOC_000215	SDOW01000002.1	5941357	5942904	-	1215	0.579424	0.0255682	u	3
28	TCONS_00000664	XLOC_000215	SDOW01000002.1	5941357	5942904	-	1272	0.576258	0.0286494	u	3
29	TCONS_00000665	XLOC_000215	SDOW01000002.1	5941357	5942904	-	1289	0.578743	0.0241287	u	3
30	TCONS_00000666	XLOC_000215	SDOW01000002.1	5941357	5942904	-	1292	0.578947	0.026738	u	3
31	TCONS_00000757	XLOC_000237	SDOW01000002.1	7818105	7819883	-	429	0.438228	-0.0106383	u	2
32	TCONS_00000795	XLOC_000251	SDOW01000002.1	3959179	3959575	.	396	0.429293	-0.0941176	u	1
33	TCONS_00000798	XLOC_000254	SDOW01000002.1	5884875	5885530	.	655	0.528244	0.156069	u	1
34	TCONS_00000799	XLOC_000255	SDOW01000002.1	6181775	6182169	.	394	0.441624	-0.333333	u	1
35	TCONS_00000800	XLOC_000256	SDOW01000002.1	7095716	7095938	.	222	0.418919	0.0752688	u	1
36	TCONS_00000801	XLOC_000257	SDOW01000002.1	7268222	7268904	.	682	0.524927	0.0893855	u	1
37	TCONS_00001035	XLOC_000337	SDOW01000003.1	8165557	8169237	+	733	0.48704	0.092437	j	4
38	TCONS_00001044	XLOC_000340	SDOW01000003.1	8600813	8607506	+	1358	0.561856	0.0563565	u	2
39	TCONS_00001118	XLOC_000377	SDOW01000003.1	13423104	13425544	+	581	0.700516	0.017199	o	2
40	TCONS_00001136	XLOC_000382	SDOW01000003.1	13954981	13964869	+	910	0.403297	0.111717	u	2
41	TCONS_00001161	XLOC_000390	SDOW01000003.1	15108161	15110119	+	530	0.533962	-0.109541	u	2
42	TCONS_00001175	XLOC_000394	SDOW01000003.1	15382333	15385943	+	3293	0.430003	0.0720339	o	3
43	TCONS_00001180	XLOC_000396	SDOW01000003.1	15446827	15454156	+	589	0.65365	-0.163636	x	4
44	TCONS_00001181	XLOC_000397	SDOW01000003.1	15495636	15502113	+	914	0.540481	-0.226721	u	2
45	TCONS_00001182	XLOC_000397	SDOW01000003.1	15495636	15502113	+	576	0.633681	-0.194521	x	3
46	TCONS_00001342	XLOC_000432	SDOW01000003.1	3432495	3433658	-	541	0.54159	0.139932	u	2
47	TCONS_00001348	XLOC_000436	SDOW01000003.1	3616225	3619038	-	524	0.545802	-0.118881	u	2
48	TCONS_00001349	XLOC_000436	SDOW01000003.1	3616225	3619038	-	524	0.549618	-0.118056	u	3
49	TCONS_00001350	XLOC_000436	SDOW01000003.1	3616225	3619038	-	317	0.608833	-0.0259067	u	2
50	TCONS_00001364	XLOC_000440	SDOW01000003.1	3956595	3957373	-	691	0.413893	0.020979	u	2
51	TCONS_00001395	XLOC_000456	SDOW01000003.1	6288523	6289356	-	478	0.577406	-0.0652174	o	2
52	TCONS_00001584	XLOC_000519	SDOW01000003.1	15495636	15502113	-	3083	0.446643	-0.119826	o	3
53	TCONS_00001600	XLOC_000528	SDOW01000003.1	1442649	1458313	.	434	0.523041	-0.154185	u	1
54	TCONS_00001603	XLOC_000531	SDOW01000003.1	3468208	3468532	.	324	0.398148	-0.0697674	u	1
55	TCONS_00001604	XLOC_000532	SDOW01000003.1	3490960	3491332	.	372	0.424731	0.13924	u	1
56	TCONS_00001605	XLOC_000533	SDOW01000003.1	3616225	3619038	.	295	0.413559	-0.0491803	u	1
57	TCONS_00001606	XLOC_000534	SDOW01000003.1	5195090	5195493	.	403	0.568238	0.0655022	u	1
58	TCONS_00001607	XLOC_000535	SDOW01000003.1	8134303	8134786	.	483	0.559006	0.17037	u	1
59	TCONS_00001608	XLOC_000536	SDOW01000003.1	8160337	8160887	.	550	0.425455	0.025641	u	1
60	TCONS_00001609	XLOC_000537	SDOW01000003.1	8161016	8162069	.	1053	0.334283	0.0852273	u	1
61	TCONS_00001610	XLOC_000538	SDOW01000003.1	8162264	8162753	.	489	0.447853	0.0958904	u	1
62	TCONS_00001611	XLOC_000539	SDOW01000003.1	8162843	8164578	.	1735	0.385591	-0.019432	u	1
63	TCONS_00001612	XLOC_000540	SDOW01000003.1	10263229	10263662	.	433	0.65358	-0.201413	u	1
64	TCONS_00001613	XLOC_000541	SDOW01000003.1	13794788	13798379	.	748	0.363636	0.0441177	u	1
65	TCONS_00001614	XLOC_000542	SDOW01000003.1	15115883	15116278	.	395	0.412658	0.0552147	u	1
66	TCONS_00001615	XLOC_000543	SDOW01000003.1	15168682	15169682	.	1000	0.546	-0.124542	u	1
67	TCONS_00001650	XLOC_000560	SDOW01000004.1	2198646	2200000	+	1225	0.56898	0.0989957	u	2
68	TCONS_00001817	XLOC_000628	SDOW01000004.1	493070	493632	-	475	0.612632	-0.209622	u	2
69	TCONS_00001865	XLOC_000648	SDOW01000004.1	2724814	2725579	-	712	0.627809	0.0917226	o	2
70	TCONS_00001902	XLOC_000663	SDOW01000004.1	5850140	5853527	-	629	0.36407	0.117904	u	4
71	TCONS_00001903	XLOC_000663	SDOW01000004.1	5850140	5853527	-	758	0.358839	0.139706	u	4
72	TCONS_00001904	XLOC_000663	SDOW01000004.1	5850140	5853527	-	603	0.462687	-0.146953	u	2
73	TCONS_00001954	XLOC_000678	SDOW01000004.1	7664306	7672183	-	941	0.481403	0.0816777	u	3
74	TCONS_00001955	XLOC_000678	SDOW01000004.1	7664306	7672183	-	2201	0.47433	0.0574713	u	9
75	TCONS_00001992	XLOC_000685	SDOW01000004.1	9177708	9178361	-	553	0.620253	-0.189504	u	2
76	TCONS_00001993	XLOC_000686	SDOW01000004.1	436294	436669	.	375	0.610667	-0.0742358	u	1
77	TCONS_00001994	XLOC_000687	SDOW01000004.1	906624	907174	.	550	0.581818	-0.125	u	1
78	TCONS_00001996	XLOC_000689	SDOW01000004.1	2743657	2744107	.	450	0.522222	0.157447	u	1
79	TCONS_00001998	XLOC_000691	SDOW01000004.1	4869691	4869904	.	213	0.535211	0.0350877	u	1
80	TCONS_00002000	XLOC_000693	SDOW01000004.1	7188034	7188373	.	339	0.445428	-0.152318	u	1
81	TCONS_00002001	XLOC_000694	SDOW01000004.1	7188438	7188681	.	243	0.489712	-0.0252101	u	1
82	TCONS_00002002	XLOC_000695	SDOW01000004.1	7190563	7190795	.	232	0.711207	-0.0909091	u	1
83	TCONS_00002003	XLOC_000696	SDOW01000004.1	7519056	7519770	.	714	0.55042	0.0229008	u	1
84	TCONS_00002004	XLOC_000697	SDOW01000004.1	9170273	9170940	.	667	0.589205	0.343511	u	1
85	TCONS_00002064	XLOC_000710	SDOW01000005.1	2179595	2181945	+	448	0.446429	0.21	u	5
86	TCONS_00002065	XLOC_000710	SDOW01000005.1	2179595	2181945	+	239	0.380753	0.208791	u	4
87	TCONS_00002066	XLOC_000710	SDOW01000005.1	2179595	2181945	+	723	0.359613	0.215385	u	2
88	TCONS_00002210	XLOC_000744	SDOW01000005.1	5448390	5452371	+	567	0.569665	-0.0402477	u	2
89	TCONS_00002211	XLOC_000744	SDOW01000005.1	5448390	5452371	+	423	0.49409	0.0430622	u	2
90	TCONS_00002212	XLOC_000744	SDOW01000005.1	5448390	5452371	+	763	0.458716	0.0685714	u	2
91	TCONS_00002266	XLOC_000759	SDOW01000005.1	7132424	7134092	+	459	0.503268	-0.116883	j	4
92	TCONS_00002267	XLOC_000759	SDOW01000005.1	7132424	7134092	+	345	0.510145	-0.170455	j	3
93	TCONS_00002388	XLOC_000788	SDOW01000005.1	4017543	4018255	-	536	0.565299	-0.0693069	o	2
94	TCONS_00002472	XLOC_000808	SDOW01000005.1	6181125	6188745	-	1834	0.48855	-0.0290179	j	4
95	TCONS_00002474	XLOC_000808	SDOW01000005.1	6181125	6188745	-	2364	0.49154	0.010327	j	3
96	TCONS_00002475	XLOC_000808	SDOW01000005.1	6181125	6188745	-	5633	0.445056	-0.0482649	j	3
97	TCONS_00002477	XLOC_000808	SDOW01000005.1	6181125	6188745	-	5679	0.443388	-0.0484511	j	3
98	TCONS_00002479	XLOC_000808	SDOW01000005.1	6181125	6188745	-	1768	0.477941	-0.0248521	j	3
99	TCONS_00002531	XLOC_000816	SDOW01000005.1	7832624	7834908	-	1907	0.447824	-0.0632319	j	2
100	TCONS_00002552	XLOC_000824	SDOW01000005.1	8643451	8646108	-	922	0.519523	-0.0271399	j	2
101	TCONS_00002560	XLOC_000828	SDOW01000005.1	4248168	4248435	.	267	0.520599	-0.00719425	u	1
102	TCONS_00002562	XLOC_000830	SDOW01000005.1	7245761	7255735	.	673	0.325409	-0.296804	u	1
103	TCONS_00002563	XLOC_000831	SDOW01000005.1	7959753	7960884	.	1131	0.59328	-0.052161	u	1
104	TCONS_00002564	XLOC_000832	SDOW01000005.1	8010441	8011159	.	718	0.662953	0.138655	u	1
105	TCONS_00002677	XLOC_000876	SDOW01000006.1	7954040	7954970	+	860	0.397674	0.0292398	u	2
106	TCONS_00002819	XLOC_000927	SDOW01000006.1	6731863	6735056	-	1109	0.556357	-0.082658	u	4
107	TCONS_00002820	XLOC_000927	SDOW01000006.1	6731863	6735056	-	1167	0.557841	-0.0875576	u	4
108	TCONS_00002821	XLOC_000927	SDOW01000006.1	6731863	6735056	-	1278	0.543818	-0.0848921	u	5
109	TCONS_00002822	XLOC_000927	SDOW01000006.1	6731863	6735056	-	1290	0.543411	-0.0813124	u	5
110	TCONS_00002823	XLOC_000927	SDOW01000006.1	6731863	6735056	-	2228	0.464093	-0.0851064	u	4
111	TCONS_00002824	XLOC_000928	SDOW01000006.1	6812882	6815517	-	2635	0.480835	-0.00394633	u	1
112	TCONS_00002825	XLOC_000928	SDOW01000006.1	6812882	6815517	-	332	0.611446	-0.0246305	u	2
113	TCONS_00002932	XLOC_000957	SDOW01000006.1	5565560	5571959	.	321	0.626168	-0.243781	u	1
114	TCONS_00002933	XLOC_000958	SDOW01000006.1	7922900	7923411	.	511	0.53816	-0.0327273	u	1
115	TCONS_00002934	XLOC_000959	SDOW01000006.1	8710792	8711487	.	695	0.572662	0.0904523	u	1
116	TCONS_00002935	XLOC_000960	SDOW01000006.1	9263971	9271849	.	217	0.345622	0.0666667	u	1
117	TCONS_00002936	XLOC_000961	SDOW01000006.1	10141154	10142391	.	1237	0.504446	0.11859	u	1
118	TCONS_00003076	XLOC_001010	SDOW01000007.1	7861596	7867410	+	741	0.431849	0.16875	u	2
119	TCONS_00003119	XLOC_001027	SDOW01000007.1	9727036	9733466	+	2293	0.440471	-0.0415842	u	5
120	TCONS_00003120	XLOC_001027	SDOW01000007.1	9727036	9733466	+	2289	0.439493	-0.0337972	u	5
121	TCONS_00003129	XLOC_001029	SDOW01000007.1	9821245	9822466	+	1100	0.469091	-0.00775194	u	2
122	TCONS_00003175	XLOC_001043	SDOW01000007.1	1853140	1857866	-	450	0.58	0.241379	u	3
123	TCONS_00003191	XLOC_001048	SDOW01000007.1	3135688	3139976	-	1781	0.475576	-0.05549	u	5
124	TCONS_00003192	XLOC_001048	SDOW01000007.1	3135688	3139976	-	1900	0.471579	-0.0446429	u	6
125	TCONS_00003193	XLOC_001048	SDOW01000007.1	3135688	3139976	-	2345	0.447761	-0.0304762	u	6
126	TCONS_00003194	XLOC_001048	SDOW01000007.1	3135688	3139976	-	2473	0.445613	-0.0490018	u	5
127	TCONS_00003320	XLOC_001085	SDOW01000007.1	962518	962760	.	242	0.5	0.289256	u	1
128	TCONS_00003321	XLOC_001086	SDOW01000007.1	5548160	5548608	.	448	0.354911	-0.132075	u	1
129	TCONS_00003322	XLOC_001087	SDOW01000007.1	8366409	8366724	.	315	0.593651	0.00534759	u	1
130	TCONS_00003323	XLOC_001088	SDOW01000007.1	8378715	8380361	.	1646	0.45808	-0.0503979	u	1
131	TCONS_00003324	XLOC_001089	SDOW01000007.1	9820160	9821035	.	875	0.460571	-0.0421836	u	1
132	TCONS_00003377	XLOC_001113	SDOW01000008.1	6375045	6386534	+	1195	0.457741	0.0420475	j	6
133	TCONS_00003378	XLOC_001113	SDOW01000008.1	6375045	6386534	+	2516	0.417727	0.0428164	j	6
134	TCONS_00003479	XLOC_001141	SDOW01000008.1	2203378	2207509	-	1485	0.476768	-0.0480226	u	2
135	TCONS_00003484	XLOC_001143	SDOW01000008.1	2855162	2857236	-	888	0.603604	-0.223881	u	1
136	TCONS_00003573	XLOC_001179	SDOW01000008.1	313651	314600	.	949	0.624868	-0.288364	u	1
137	TCONS_00003575	XLOC_001181	SDOW01000008.1	731504	744776	.	253	0.596838	0.298013	u	1
138	TCONS_00003576	XLOC_001182	SDOW01000008.1	4317582	4318017	.	435	0.705747	-0.270358	u	1
139	TCONS_00003578	XLOC_001184	SDOW01000008.1	8405505	8405776	.	271	0.405904	0	u	1
140	TCONS_00003653	XLOC_001207	SDOW01000009.1	1667473	1670014	+	2541	0.454939	-0.0259516	u	1
141	TCONS_00003654	XLOC_001207	SDOW01000009.1	1667473	1670014	+	692	0.557803	-0.0621762	u	2
142	TCONS_00003655	XLOC_001207	SDOW01000009.1	1667473	1670014	+	1757	0.464428	-0.0735294	u	2
143	TCONS_00003665	XLOC_001211	SDOW01000009.1	2990869	2995566	+	1813	0.487038	0.0260476	u	6
144	TCONS_00003666	XLOC_001211	SDOW01000009.1	2990869	2995566	+	2908	0.457703	0.0428249	u	3
145	TCONS_00003667	XLOC_001211	SDOW01000009.1	2990869	2995566	+	1986	0.475327	0.0360169	u	5
146	TCONS_00003668	XLOC_001211	SDOW01000009.1	2990869	2995566	+	2886	0.455648	0.0539924	u	6
147	TCONS_00003669	XLOC_001211	SDOW01000009.1	2990869	2995566	+	3395	0.440648	0.0320856	u	2
148	TCONS_00003670	XLOC_001211	SDOW01000009.1	2990869	2995566	+	2376	0.45202	0.0316574	u	4
149	TCONS_00003671	XLOC_001211	SDOW01000009.1	2990869	2995566	+	3355	0.440238	0.0589032	u	5
150	TCONS_00003673	XLOC_001211	SDOW01000009.1	2990869	2995566	+	2986	0.453449	0.0384047	u	3
151	TCONS_00003674	XLOC_001211	SDOW01000009.1	2990869	2995566	+	3465	0.436652	0.0522141	u	4
152	TCONS_00003678	XLOC_001211	SDOW01000009.1	2990869	2995566	+	2563	0.458837	0.0323129	u	6
153	TCONS_00003679	XLOC_001211	SDOW01000009.1	2990869	2995566	+	2175	0.47954	0.0373921	u	6
154	TCONS_00003703	XLOC_001217	SDOW01000009.1	4446199	4453391	+	2507	0.414838	-0.0596154	u	4
155	TCONS_00003705	XLOC_001217	SDOW01000009.1	4446199	4453391	+	2179	0.392841	-0.0257009	u	2
156	TCONS_00003745	XLOC_001234	SDOW01000009.1	6114546	6117668	+	1005	0.534328	-0.027933	u	7
157	TCONS_00003746	XLOC_001234	SDOW01000009.1	6114546	6117668	+	1022	0.533268	-0.0201835	u	7
158	TCONS_00003776	XLOC_001240	SDOW01000009.1	6409246	6409640	+	223	0.434978	-0.0309278	u	3
159	TCONS_00003884	XLOC_001283	SDOW01000009.1	11770502	11772857	+	317	0.422713	-0.0298507	u	2
160	TCONS_00003939	XLOC_001308	SDOW01000009.1	340125	340737	-	429	0.461538	0.232323	u	3
161	TCONS_00003949	XLOC_001311	SDOW01000009.1	481372	486416	-	359	0.445682	-0.1125	u	1
162	TCONS_00003961	XLOC_001316	SDOW01000009.1	570767	575437	-	1025	0.515122	-0.0189394	j	3
163	TCONS_00003965	XLOC_001317	SDOW01000009.1	681607	682986	-	822	0.423358	0.0402299	u	2
164	TCONS_00003966	XLOC_001317	SDOW01000009.1	681607	682986	-	854	0.421546	0.0388889	u	2
165	TCONS_00003967	XLOC_001317	SDOW01000009.1	681607	682986	-	1158	0.367012	0.110588	u	3
166	TCONS_00003969	XLOC_001318	SDOW01000009.1	687595	690948	-	1651	0.496063	0.179487	u	2
167	TCONS_00003970	XLOC_001318	SDOW01000009.1	687595	690948	-	1618	0.490111	0.190416	u	2
168	TCONS_00003982	XLOC_001321	SDOW01000009.1	1913175	1918387	-	317	0.640379	-0.231527	u	2
169	TCONS_00003986	XLOC_001324	SDOW01000009.1	3019883	3026545	-	1900	0.512105	-0.0441932	u	4
170	TCONS_00003987	XLOC_001324	SDOW01000009.1	3019883	3026545	-	1323	0.520786	-0.149492	u	4
171	TCONS_00004028	XLOC_001340	SDOW01000009.1	4850889	4851667	-	572	0.552448	0.0443038	u	3
172	TCONS_00004059	XLOC_001350	SDOW01000009.1	5799115	5799654	-	429	0.410256	-0.0227273	u	2
173	TCONS_00004210	XLOC_001396	SDOW01000009.1	9621490	9622910	-	787	0.47141	0.0781671	u	4
174	TCONS_00004211	XLOC_001396	SDOW01000009.1	9621490	9622910	-	1144	0.476399	0.0458716	u	3
175	TCONS_00004212	XLOC_001396	SDOW01000009.1	9621490	9622910	-	1040	0.479808	0.0420842	u	2
176	TCONS_00004239	XLOC_001409	SDOW01000009.1	11736951	11741127	-	1050	0.491429	-0.143411	x	2
177	TCONS_00004266	XLOC_001420	SDOW01000009.1	685856	686205	.	349	0.492837	-0.0930233	u	1
178	TCONS_00004267	XLOC_001421	SDOW01000009.1	1911346	1911627	.	281	0.601423	-0.159763	u	1
179	TCONS_00004268	XLOC_001422	SDOW01000009.1	2794823	2795572	.	749	0.555407	-0.0865385	u	1
180	TCONS_00004269	XLOC_001423	SDOW01000009.1	2996708	2997383	.	675	0.521481	0.0625	u	1
181	TCONS_00004270	XLOC_001424	SDOW01000009.1	3019883	3026545	.	464	0.471983	-0.0319635	u	1
182	TCONS_00004273	XLOC_001427	SDOW01000009.1	4458195	4458712	.	517	0.601547	-0.0160772	u	1
183	TCONS_00004274	XLOC_001428	SDOW01000009.1	5334408	5335046	.	638	0.462382	0.0305085	u	1
184	TCONS_00004275	XLOC_001429	SDOW01000009.1	5335555	5336121	.	566	0.524735	0.0707071	u	1
185	TCONS_00004276	XLOC_001430	SDOW01000009.1	5800112	5800452	.	340	0.505882	0.430233	u	1
186	TCONS_00004279	XLOC_001433	SDOW01000009.1	10090016	10090743	.	727	0.427785	-0.0803858	u	1
187	TCONS_00004342	XLOC_001456	SDOW01000010.1	2955045	2957634	+	2310	0.493939	-0.0341805	u	4
188	TCONS_00004364	XLOC_001465	SDOW01000010.1	4886112	4888019	+	1207	0.549296	-0.0769231	u	4
189	TCONS_00004365	XLOC_001465	SDOW01000010.1	4886112	4888019	+	1819	0.492578	-0.03125	u	2
190	TCONS_00004366	XLOC_001465	SDOW01000010.1	4886112	4888019	+	1822	0.492316	-0.0301003	u	2
191	TCONS_00004367	XLOC_001465	SDOW01000010.1	4886112	4888019	+	1624	0.490764	-0.06399	u	3
192	TCONS_00004368	XLOC_001465	SDOW01000010.1	4886112	4888019	+	1269	0.546099	-0.0505051	u	3
193	TCONS_00004369	XLOC_001465	SDOW01000010.1	4886112	4888019	+	1683	0.491979	-0.0434783	u	2
194	TCONS_00004439	XLOC_001497	SDOW01000010.1	6714115	6714898	+	576	0.401042	0.151515	u	3
195	TCONS_00004459	XLOC_001502	SDOW01000010.1	6979693	6981947	+	1324	0.364048	0.112033	u	3
196	TCONS_00004460	XLOC_001502	SDOW01000010.1	6979693	6981947	+	406	0.3867	0.159236	u	2
197	TCONS_00004559	XLOC_001543	SDOW01000010.1	10037586	10038707	+	678	0.492625	0	u	2
198	TCONS_00004688	XLOC_001575	SDOW01000010.1	2530851	2532044	-	1020	0.544118	0.0486486	u	3
199	TCONS_00004689	XLOC_001575	SDOW01000010.1	2530851	2532044	-	1024	0.543945	0.0520646	u	3
200	TCONS_00004724	XLOC_001593	SDOW01000010.1	4824368	4824997	-	546	0.52381	-0.167832	u	2
201	TCONS_00004965	XLOC_001689	SDOW01000010.1	1446796	1447132	.	336	0.714286	-0.0583333	u	1
202	TCONS_00004967	XLOC_001691	SDOW01000010.1	2574227	2574565	.	338	0.405325	0.343066	u	1
203	TCONS_00004968	XLOC_001692	SDOW01000010.1	2948557	2948976	.	419	0.665871	-0.132616	u	1
204	TCONS_00004969	XLOC_001693	SDOW01000010.1	2949340	2949781	.	441	0.721088	-0.0880503	u	1
205	TCONS_00004971	XLOC_001695	SDOW01000010.1	4823309	4823545	.	236	0.635593	0.16	u	1
206	TCONS_00004972	XLOC_001696	SDOW01000010.1	4825514	4826788	.	1274	0.525903	0.235821	u	1
207	TCONS_00004974	XLOC_001698	SDOW01000010.1	5399655	5399978	.	323	0.386997	0.008	u	1
208	TCONS_00004976	XLOC_001700	SDOW01000010.1	8832067	8832507	.	440	0.456818	0.0447761	u	1
209	TCONS_00004980	XLOC_001704	SDOW01000010.1	11478516	11479728	.	1212	0.622112	0.124668	u	1
210	TCONS_00005026	XLOC_001727	SDOW01000011.1	2561246	2565579	+	2930	0.47372	0.0706052	u	7
211	TCONS_00005027	XLOC_001727	SDOW01000011.1	2561246	2565579	+	3444	0.458769	0.078481	u	6
212	TCONS_00005028	XLOC_001727	SDOW01000011.1	2561246	2565579	+	3654	0.44855	0.0872483	u	5
213	TCONS_00005029	XLOC_001727	SDOW01000011.1	2561246	2565579	+	3116	0.457638	0.0953717	u	6
214	TCONS_00005031	XLOC_001727	SDOW01000011.1	2561246	2565579	+	3604	0.445893	0.102676	u	5
215	TCONS_00005032	XLOC_001727	SDOW01000011.1	2561246	2565579	+	2814	0.468017	0.0964313	u	7
216	TCONS_00005033	XLOC_001727	SDOW01000011.1	2561246	2565579	+	3627	0.445823	0.0995671	u	5
217	TCONS_00005034	XLOC_001727	SDOW01000011.1	2561246	2565579	+	3314	0.454436	0.10093	u	6
218	TCONS_00005035	XLOC_001727	SDOW01000011.1	2561246	2565579	+	2763	0.469417	0.0948342	u	7
219	TCONS_00005036	XLOC_001727	SDOW01000011.1	2561246	2565579	+	2825	0.468319	0.0959939	u	7
220	TCONS_00005037	XLOC_001727	SDOW01000011.1	2561246	2565579	+	3333	0.453645	0.101852	u	6
221	TCONS_00005038	XLOC_001727	SDOW01000011.1	2561246	2565579	+	2845	0.467838	0.0939143	u	7
222	TCONS_00005040	XLOC_001727	SDOW01000011.1	2561246	2565579	+	3313	0.453969	0.103723	u	6
223	TCONS_00005042	XLOC_001727	SDOW01000011.1	2561246	2565579	+	2994	0.465264	0.0911701	u	6
224	TCONS_00005043	XLOC_001727	SDOW01000011.1	2561246	2565579	+	2822	0.468462	0.0953101	u	7
225	TCONS_00005045	XLOC_001727	SDOW01000011.1	2561246	2565579	+	3541	0.447896	0.107188	u	4
226	TCONS_00005046	XLOC_001727	SDOW01000011.1	2561246	2565579	+	3239	0.456005	0.109005	u	5
227	TCONS_00005157	XLOC_001782	SDOW01000011.1	9063478	9064672	+	450	0.575556	0.104247	u	3
228	TCONS_00005158	XLOC_001782	SDOW01000011.1	9063478	9064672	+	684	0.428363	-0.0170648	u	1
229	TCONS_00005314	XLOC_001844	SDOW01000011.1	3955436	3960519	-	2061	0.400291	0.0157576	u	2
230	TCONS_00005368	XLOC_001866	SDOW01000011.1	7011794	7014700	-	908	0.557269	-0.150198	u	3
231	TCONS_00005369	XLOC_001866	SDOW01000011.1	7011794	7014700	-	1837	0.448557	-0.0703884	u	3
232	TCONS_00005370	XLOC_001866	SDOW01000011.1	7011794	7014700	-	2779	0.433249	-0.0531561	u	2
233	TCONS_00005376	XLOC_001869	SDOW01000011.1	7838653	7839113	-	369	0.417344	0.025974	u	2
234	TCONS_00005385	XLOC_001871	SDOW01000011.1	7894631	7895198	-	313	0.632588	-0.181818	u	2
235	TCONS_00005405	XLOC_001883	SDOW01000011.1	2566617	2567258	.	641	0.552262	0.163842	u	1
236	TCONS_00005407	XLOC_001885	SDOW01000011.1	6786507	6791507	.	848	0.525943	0.112108	u	1
237	TCONS_00005410	XLOC_001888	SDOW01000011.1	10055539	10058156	.	2617	0.455865	-0.0595138	u	1
238	TCONS_00005412	XLOC_001890	SDOW01000011.1	10608352	10608897	.	545	0.655046	0.333333	u	1
239	TCONS_00005413	XLOC_001891	SDOW01000011.1	10609551	10609865	.	314	0.480892	-0.00662252	u	1
240	TCONS_00005414	XLOC_001892	SDOW01000011.1	10611321	10612084	.	763	0.427261	-0.0552147	u	1
241	TCONS_00005415	XLOC_001893	SDOW01000011.1	10624331	10624843	.	512	0.615234	-0.111111	u	1
242	TCONS_00005416	XLOC_001894	SDOW01000011.1	10625677	10626108	.	431	0.582367	-0.0756972	u	1
243	TCONS_00005417	XLOC_001895	SDOW01000011.1	10626720	10627262	.	542	0.616236	0.0179641	u	1
244	TCONS_00005518	XLOC_001921	SDOW01000012.1	2214431	2214866	+	332	0.394578	0.0534351	u	2
245	TCONS_00005892	XLOC_002033	SDOW01000012.1	7883195	7892703	-	3380	0.383728	0.0439476	x	7
246	TCONS_00005893	XLOC_002033	SDOW01000012.1	7883195	7892703	-	3080	0.393506	0.0115512	x	7
247	TCONS_00005902	XLOC_002034	SDOW01000012.1	8192596	8195798	-	707	0.428571	-0.0165016	u	4
248	TCONS_00005903	XLOC_002034	SDOW01000012.1	8192596	8195798	-	772	0.433938	-0.0149254	u	4
249	TCONS_00005904	XLOC_002035	SDOW01000012.1	8205515	8210268	-	824	0.558252	0.0217391	u	4
250	TCONS_00005911	XLOC_002041	SDOW01000012.1	9692094	9693896	-	228	0.561404	0.15625	u	3
251	TCONS_00005912	XLOC_002041	SDOW01000012.1	9692094	9693896	-	409	0.449878	0.0652174	u	2
252	TCONS_00005913	XLOC_002042	SDOW01000012.1	278565	279071	.	506	0.63834	-0.00309598	u	1
253	TCONS_00005914	XLOC_002043	SDOW01000012.1	747321	747697	.	376	0.390957	-0.0748299	u	1
254	TCONS_00005916	XLOC_002045	SDOW01000012.1	1531082	1531837	.	755	0.331126	0.128	u	1
255	TCONS_00005917	XLOC_002046	SDOW01000012.1	2215050	2220581	.	608	0.361842	0.1	u	1
256	TCONS_00005919	XLOC_002048	SDOW01000012.1	5558587	5559280	.	693	0.61039	0.0591017	u	1
257	TCONS_00005921	XLOC_002050	SDOW01000012.1	8764193	8765315	.	1122	0.547237	0.107492	u	1
258	TCONS_00005923	XLOC_002052	SDOW01000012.1	9691100	9692011	.	911	0.363337	-0.0936556	u	1
259	TCONS_00005971	XLOC_002066	SDOW01000013.1	2158596	2169754	+	598	0.41806	0.152	u	3
260	TCONS_00006072	XLOC_002100	SDOW01000013.1	4419879	4429887	+	2362	0.465284	-0.0464058	u	6
261	TCONS_00006085	XLOC_002100	SDOW01000013.1	4419879	4429887	+	4293	0.438854	-0.0180467	u	6
262	TCONS_00006088	XLOC_002100	SDOW01000013.1	4419879	4429887	+	1593	0.510358	-0.0873309	u	7
263	TCONS_00006089	XLOC_002100	SDOW01000013.1	4419879	4429887	+	2080	0.442788	-0.0228013	u	4
264	TCONS_00006090	XLOC_002100	SDOW01000013.1	4419879	4429887	+	2560	0.465234	-0.0730479	u	7
265	TCONS_00006093	XLOC_002100	SDOW01000013.1	4419879	4429887	+	5011	0.432049	-0.0124711	u	4
266	TCONS_00006098	XLOC_002100	SDOW01000013.1	4419879	4429887	+	2087	0.483469	-0.0564916	u	6
267	TCONS_00006099	XLOC_002100	SDOW01000013.1	4419879	4429887	+	2461	0.466071	-0.070619	u	6
268	TCONS_00006100	XLOC_002100	SDOW01000013.1	4419879	4429887	+	1465	0.517406	-0.0923483	u	7
269	TCONS_00006101	XLOC_002100	SDOW01000013.1	4419879	4429887	+	3124	0.43662	0.0249267	u	6
270	TCONS_00006102	XLOC_002100	SDOW01000013.1	4419879	4429887	+	1399	0.513939	-0.10153	u	6
271	TCONS_00006103	XLOC_002100	SDOW01000013.1	4419879	4429887	+	4510	0.430377	0.00360639	u	7
272	TCONS_00006104	XLOC_002100	SDOW01000013.1	4419879	4429887	+	5036	0.427323	0	u	4
273	TCONS_00006105	XLOC_002100	SDOW01000013.1	4419879	4429887	+	1618	0.49382	-0.0538173	u	7
274	TCONS_00006107	XLOC_002100	SDOW01000013.1	4419879	4429887	+	3824	0.417103	0.0420063	u	4
275	TCONS_00006108	XLOC_002100	SDOW01000013.1	4419879	4429887	+	4373	0.432198	-0.0031746	u	6
276	TCONS_00006110	XLOC_002100	SDOW01000013.1	4419879	4429887	+	2951	0.448661	-0.0347432	u	6
277	TCONS_00006111	XLOC_002100	SDOW01000013.1	4419879	4429887	+	2105	0.473159	-0.0281125	u	6
278	TCONS_00006112	XLOC_002100	SDOW01000013.1	4419879	4429887	+	4167	0.430526	-0.00557414	u	5
279	TCONS_00006114	XLOC_002100	SDOW01000013.1	4419879	4429887	+	4000	0.42625	0.027566	u	6
280	TCONS_00006198	XLOC_002137	SDOW01000013.1	7241789	7245932	+	1061	0.466541	0.0181818	u	3
281	TCONS_00006199	XLOC_002137	SDOW01000013.1	7241789	7245932	+	1023	0.44477	0.0549451	u	2
282	TCONS_00006200	XLOC_002137	SDOW01000013.1	7241789	7245932	+	627	0.53429	-0.080597	u	4
283	TCONS_00006433	XLOC_002194	SDOW01000013.1	4240831	4242383	-	1425	0.560702	0.101377	u	2
284	TCONS_00006536	XLOC_002216	SDOW01000013.1	5933898	5941806	-	1506	0.511952	0.0531777	u	5
285	TCONS_00006537	XLOC_002216	SDOW01000013.1	5933898	5941806	-	2703	0.446171	0.0762852	u	4
286	TCONS_00006538	XLOC_002216	SDOW01000013.1	5933898	5941806	-	2059	0.455075	0.058698	u	6
287	TCONS_00006618	XLOC_002240	SDOW01000013.1	2044088	2044559	.	471	0.696391	-0.134146	u	1
288	TCONS_00006619	XLOC_002241	SDOW01000013.1	2279111	2279418	.	307	0.407166	0.04	u	1
289	TCONS_00006622	XLOC_002244	SDOW01000013.1	4419120	4419603	.	483	0.670807	-0.0802469	u	1
290	TCONS_00006623	XLOC_002245	SDOW01000013.1	4419879	4429887	.	204	0.642157	0.0229008	u	1
291	TCONS_00006629	XLOC_002251	SDOW01000013.1	6095388	6097966	.	436	0.31422	-0.0364963	u	1
292	TCONS_00006631	XLOC_002253	SDOW01000013.1	7241789	7245932	.	253	0.375494	0.178947	u	1
293	TCONS_00006632	XLOC_002254	SDOW01000013.1	7248801	7249170	.	369	0.341463	-0.0952381	u	1
294	TCONS_00006633	XLOC_002255	SDOW01000013.1	7249651	7249903	.	252	0.396825	0.18	u	1
295	TCONS_00006635	XLOC_002257	SDOW01000013.1	8344068	8344868	.	800	0.52875	-0.00236407	u	1
296	TCONS_00006669	XLOC_002267	SDOW01000014.1	1825338	1826899	+	924	0.465368	0	u	2
297	TCONS_00006673	XLOC_002270	SDOW01000014.1	2266709	2270148	+	926	0.49568	-0.102397	u	4
298	TCONS_00006674	XLOC_002270	SDOW01000014.1	2266709	2270148	+	1059	0.483475	-0.0976562	u	5
299	TCONS_00006675	XLOC_002270	SDOW01000014.1	2266709	2270148	+	1077	0.483751	-0.0902111	u	5
300	TCONS_00006676	XLOC_002270	SDOW01000014.1	2266709	2270148	+	896	0.492188	-0.0839002	u	4
301	TCONS_00006677	XLOC_002270	SDOW01000014.1	2266709	2270148	+	920	0.491304	-0.0707965	u	4
302	TCONS_00006678	XLOC_002270	SDOW01000014.1	2266709	2270148	+	1057	0.480605	-0.0669291	u	5
303	TCONS_00006686	XLOC_002274	SDOW01000014.1	3349144	3349786	+	481	0.444906	0.0560748	u	2
304	TCONS_00006805	XLOC_002314	SDOW01000014.1	349228	351265	-	764	0.548429	-0.116945	u	3
305	TCONS_00006962	XLOC_002367	SDOW01000014.1	960972	961207	.	235	0.340426	-0.2	u	1
306	TCONS_00006963	XLOC_002368	SDOW01000014.1	962259	962951	.	692	0.695087	0.164241	u	1
307	TCONS_00007075	XLOC_002389	SDOW01000015.1	3093697	3097434	+	3628	0.400772	-0.00550206	u	2
308	TCONS_00007076	XLOC_002389	SDOW01000015.1	3093697	3097434	+	1034	0.518375	-0.123134	u	4
309	TCONS_00007077	XLOC_002389	SDOW01000015.1	3093697	3097434	+	2333	0.42006	-0.0306122	u	3
310	TCONS_00007078	XLOC_002389	SDOW01000015.1	3093697	3097434	+	1852	0.443305	-0.0377588	u	4
311	TCONS_00007079	XLOC_002389	SDOW01000015.1	3093697	3097434	+	2843	0.414351	-0.0254669	u	3
312	TCONS_00007080	XLOC_002389	SDOW01000015.1	3093697	3097434	+	1988	0.435614	-0.0207852	u	4
313	TCONS_00007081	XLOC_002389	SDOW01000015.1	3093697	3097434	+	992	0.522177	-0.119691	u	3
314	TCONS_00007082	XLOC_002389	SDOW01000015.1	3093697	3097434	+	1835	0.443052	-0.0455105	u	4
315	TCONS_00007083	XLOC_002389	SDOW01000015.1	3093697	3097434	+	1551	0.455835	-0.0777935	u	4
316	TCONS_00007307	XLOC_002467	SDOW01000015.1	6246287	6250589	-	563	0.404973	0.0438597	u	3
317	TCONS_00007311	XLOC_002469	SDOW01000015.1	6496448	6501802	-	1641	0.508227	0.0191847	x	8
318	TCONS_00007362	XLOC_002477	SDOW01000015.1	7751873	7752394	-	414	0.468599	0.123711	u	2
319	TCONS_00007385	XLOC_002485	SDOW01000015.1	8699749	8701614	-	856	0.561916	-0.139293	u	2
320	TCONS_00007386	XLOC_002485	SDOW01000015.1	8699749	8701614	-	587	0.49063	-0.0902778	u	1
321	TCONS_00007413	XLOC_002498	SDOW01000015.1	1374318	1384518	.	389	0.347044	0.0962963	u	1
322	TCONS_00007414	XLOC_002499	SDOW01000015.1	4904250	4904645	.	395	0.556962	0.0909091	u	1
323	TCONS_00007415	XLOC_002500	SDOW01000015.1	5511378	5511987	.	609	0.407225	0.0564516	u	1
324	TCONS_00007416	XLOC_002501	SDOW01000015.1	6242452	6242954	.	502	0.384462	-0.00518135	u	1
325	TCONS_00007527	XLOC_002553	SDOW01000016.1	874591	881505	-	1089	0.573921	-0.0688	j	4
326	TCONS_00007591	XLOC_002570	SDOW01000016.1	2470867	2475455	-	339	0.690265	-0.376068	u	2
327	TCONS_00007592	XLOC_002570	SDOW01000016.1	2470867	2475455	-	353	0.668555	-0.338983	u	2
328	TCONS_00007602	XLOC_002576	SDOW01000016.1	4357710	4359977	-	840	0.467857	0.19084	u	4
329	TCONS_00007603	XLOC_002576	SDOW01000016.1	4357710	4359977	-	1147	0.443766	0.0766208	u	4
330	TCONS_00007604	XLOC_002576	SDOW01000016.1	4357710	4359977	-	1887	0.410175	0.105943	u	5
331	TCONS_00007605	XLOC_002576	SDOW01000016.1	4357710	4359977	-	933	0.46731	0.123853	u	4
332	TCONS_00007606	XLOC_002576	SDOW01000016.1	4357710	4359977	-	1882	0.410733	0.0996119	u	5
333	TCONS_00007607	XLOC_002576	SDOW01000016.1	4357710	4359977	-	1061	0.457116	0.0969072	u	5
334	TCONS_00007608	XLOC_002576	SDOW01000016.1	4357710	4359977	-	1789	0.408049	0.134247	u	5
335	TCONS_00007610	XLOC_002576	SDOW01000016.1	4357710	4359977	-	1052	0.460076	0.0991735	u	5
336	TCONS_00007611	XLOC_002576	SDOW01000016.1	4357710	4359977	-	1801	0.408662	0.133152	u	5
337	TCONS_00007612	XLOC_002576	SDOW01000016.1	4357710	4359977	-	1907	0.410068	0.0997442	u	5
338	TCONS_00007613	XLOC_002576	SDOW01000016.1	4357710	4359977	-	1048	0.459924	0.0954357	u	5
339	TCONS_00007649	XLOC_002588	SDOW01000016.1	7028620	7029366	.	746	0.537534	0.306733	u	1
340	TCONS_00007682	XLOC_002591	SDOW01000017.1	749677	753168	+	1598	0.428035	-0.0964912	u	4
341	TCONS_00007684	XLOC_002591	SDOW01000017.1	749677	753168	+	2157	0.416783	-0.0656285	u	5
342	TCONS_00007719	XLOC_002601	SDOW01000017.1	2024827	2029746	+	382	0.657068	0.187251	u	3
343	TCONS_00007720	XLOC_002601	SDOW01000017.1	2024827	2029746	+	658	0.548632	0.202216	u	2
344	TCONS_00007740	XLOC_002614	SDOW01000017.1	4074639	4074970	+	238	0.415966	0.131313	u	2
345	TCONS_00007782	XLOC_002637	SDOW01000017.1	7168362	7168940	+	500	0.43	0.00465116	u	2
346	TCONS_00007934	XLOC_002668	SDOW01000017.1	12099847	12103388	+	552	0.40942	0.0619469	o	2
347	TCONS_00007948	XLOC_002673	SDOW01000017.1	12592017	12595363	+	1670	0.443713	-0.0148448	j	5
348	TCONS_00007996	XLOC_002684	SDOW01000017.1	14016236	14017954	+	1053	0.556505	-0.0238908	u	2
349	TCONS_00007999	XLOC_002686	SDOW01000017.1	14264331	14271208	+	1424	0.488062	-0.0532374	j	6
350	TCONS_00008110	XLOC_002721	SDOW01000017.1	1353247	1356715	-	630	0.534921	-0.0504451	u	5
351	TCONS_00008111	XLOC_002721	SDOW01000017.1	1353247	1356715	-	1145	0.459389	-0.0342205	u	2
352	TCONS_00008274	XLOC_002764	SDOW01000017.1	9535955	9538502	-	740	0.506757	-0.104	x	3
353	TCONS_00008275	XLOC_002765	SDOW01000017.1	9538610	9544073	-	1521	0.431295	-0.0731707	o	2
354	TCONS_00008279	XLOC_002767	SDOW01000017.1	9679098	9686749	-	232	0.448276	0	x	2
355	TCONS_00008280	XLOC_002767	SDOW01000017.1	9679098	9686749	-	237	0.451477	0.0280374	x	2
356	TCONS_00008288	XLOC_002773	SDOW01000017.1	9982750	9983679	-	697	0.556671	-0.170103	u	2
357	TCONS_00008314	XLOC_002787	SDOW01000017.1	11625548	11632431	-	6693	0.412222	0.0141356	u	3
358	TCONS_00008402	XLOC_002814	SDOW01000017.1	15319402	15320955	-	702	0.538462	0.0740741	j	2
359	TCONS_00008429	XLOC_002828	SDOW01000017.1	15787233	15789613	-	1286	0.49689	0.0391236	u	3
360	TCONS_00008430	XLOC_002828	SDOW01000017.1	15787233	15789613	-	1113	0.531896	0.0304054	u	3
361	TCONS_00008443	XLOC_002833	SDOW01000017.1	743317	743596	.	279	0.634409	-0.220339	u	1
362	TCONS_00008444	XLOC_002834	SDOW01000017.1	1353247	1356715	.	436	0.341743	0.100671	u	1
363	TCONS_00008445	XLOC_002835	SDOW01000017.1	2024827	2029746	.	320	0.409375	0.236641	u	1
364	TCONS_00008446	XLOC_002836	SDOW01000017.1	2421044	2421308	.	264	0.405303	0.140187	u	1
365	TCONS_00008455	XLOC_002842	SDOW01000018.1	87467	89982	+	922	0.449024	-0.0289855	o	2
366	TCONS_00008468	XLOC_002850	SDOW01000018.1	1414689	1417727	+	2398	0.490826	-0.0127443	u	6
367	TCONS_00008469	XLOC_002850	SDOW01000018.1	1414689	1417727	+	2242	0.509367	-0.0262697	u	6
368	TCONS_00008472	XLOC_002850	SDOW01000018.1	1414689	1417727	+	2104	0.514259	-0.0406654	u	6
369	TCONS_00008473	XLOC_002850	SDOW01000018.1	1414689	1417727	+	2564	0.476209	-0.023751	u	5
370	TCONS_00008474	XLOC_002850	SDOW01000018.1	1414689	1417727	+	1352	0.536982	-0.0853995	u	6
371	TCONS_00008475	XLOC_002850	SDOW01000018.1	1414689	1417727	+	853	0.620164	-0.0888469	u	4
372	TCONS_00008477	XLOC_002850	SDOW01000018.1	1414689	1417727	+	1355	0.529889	-0.0696379	u	6
373	TCONS_00008480	XLOC_002850	SDOW01000018.1	1414689	1417727	+	2543	0.47385	-0.0190871	u	5
374	TCONS_00008483	XLOC_002850	SDOW01000018.1	1414689	1417727	+	1745	0.535817	-0.00748663	u	7
375	TCONS_00008484	XLOC_002850	SDOW01000018.1	1414689	1417727	+	1624	0.410714	0.0344828	u	4
376	TCONS_00008495	XLOC_002857	SDOW01000018.1	2465411	2468258	+	2743	0.414145	-0.0316901	u	2
377	TCONS_00008496	XLOC_002857	SDOW01000018.1	2465411	2468258	+	2722	0.414769	-0.0327724	u	2
378	TCONS_00008497	XLOC_002857	SDOW01000018.1	2465411	2468258	+	2733	0.413099	-0.0292294	u	2
379	TCONS_00008503	XLOC_002860	SDOW01000018.1	2875076	2881197	+	773	0.452781	0.00571429	u	3
380	TCONS_00008580	XLOC_002881	SDOW01000018.1	6922311	6925723	+	462	0.627706	-0.262069	x	4
381	TCONS_00008582	XLOC_002881	SDOW01000018.1	6922311	6925723	+	525	0.598095	-0.216561	x	5
382	TCONS_00008651	XLOC_002920	SDOW01000018.1	2181165	2182168	-	853	0.583822	0.100402	u	2
383	TCONS_00008711	XLOC_002952	SDOW01000018.1	7383071	7387693	-	880	0.4625	-0.036855	u	6
384	TCONS_00008712	XLOC_002952	SDOW01000018.1	7383071	7387693	-	985	0.450761	-0.0630631	u	5
385	TCONS_00008713	XLOC_002952	SDOW01000018.1	7383071	7387693	-	1242	0.4219	-0.10687	u	6
386	TCONS_00008715	XLOC_002952	SDOW01000018.1	7383071	7387693	-	1277	0.416601	-0.093985	u	6
387	TCONS_00008716	XLOC_002952	SDOW01000018.1	7383071	7387693	-	1268	0.416404	-0.094697	u	6
388	TCONS_00008717	XLOC_002952	SDOW01000018.1	7383071	7387693	-	1237	0.42118	-0.105566	u	6
389	TCONS_00008718	XLOC_002952	SDOW01000018.1	7383071	7387693	-	826	0.451574	-0.0455764	u	7
390	TCONS_00008719	XLOC_002952	SDOW01000018.1	7383071	7387693	-	1265	0.557312	-0.140426	u	7
391	TCONS_00008722	XLOC_002952	SDOW01000018.1	7383071	7387693	-	1239	0.550444	-0.134897	u	6
392	TCONS_00008723	XLOC_002952	SDOW01000018.1	7383071	7387693	-	1486	0.543742	-0.14604	u	7
393	TCONS_00008726	XLOC_002952	SDOW01000018.1	7383071	7387693	-	1289	0.550815	-0.143662	u	6
394	TCONS_00008727	XLOC_002952	SDOW01000018.1	7383071	7387693	-	1758	0.518203	-0.145993	u	8
395	TCONS_00008728	XLOC_002952	SDOW01000018.1	7383071	7387693	-	1432	0.553073	-0.14899	u	8
396	TCONS_00008729	XLOC_002952	SDOW01000018.1	7383071	7387693	-	1427	0.552908	-0.148289	u	8
397	TCONS_00008732	XLOC_002952	SDOW01000018.1	7383071	7387693	-	1567	0.549458	-0.142857	u	9
398	TCONS_00008733	XLOC_002952	SDOW01000018.1	7383071	7387693	-	1225	0.497959	-0.190164	u	3
399	TCONS_00008734	XLOC_002952	SDOW01000018.1	7383071	7387693	-	1195	0.497071	-0.198653	u	3
400	TCONS_00008735	XLOC_002952	SDOW01000018.1	7383071	7387693	-	1229	0.498779	-0.19739	u	3
401	TCONS_00008798	XLOC_002975	SDOW01000018.1	8378833	8383746	-	809	0.515451	0.0263789	x	2
402	TCONS_00008799	XLOC_002976	SDOW01000018.1	8418785	8421810	-	1390	0.530216	-0.0312076	j	5
403	TCONS_00008854	XLOC_002982	SDOW01000018.1	8820572	8822379	-	775	0.507097	0.124682	o	2
404	TCONS_00008860	XLOC_002984	SDOW01000018.1	657984	660830	.	2846	0.461701	-0.0410959	u	1
405	TCONS_00008862	XLOC_002986	SDOW01000018.1	5083375	5087023	.	479	0.390397	-0.0588235	u	1
406	TCONS_00008863	XLOC_002987	SDOW01000018.1	8232276	8232664	.	388	0.64433	0.344	u	1
407	TCONS_00008864	XLOC_002988	SDOW01000018.1	8369615	8370406	.	791	0.4311	-0.1261	u	1
408	TCONS_00008865	XLOC_002989	SDOW01000018.1	8413920	8414376	.	456	0.587719	0.201493	u	1
409	TCONS_00008980	XLOC_003032	SDOW01000019.1	3151998	3153035	+	959	0.573514	-0.225455	u	2
410	TCONS_00009019	XLOC_003043	SDOW01000019.1	4650822	4655652	+	634	0.443218	0.0533808	u	5
411	TCONS_00009020	XLOC_003044	SDOW01000019.1	4658924	4659930	+	465	0.473118	-0.172727	u	2
412	TCONS_00009034	XLOC_003052	SDOW01000019.1	6293968	6294311	+	244	0.479508	0.162393	u	2
413	TCONS_00009035	XLOC_003053	SDOW01000019.1	6422551	6423866	+	714	0.528011	-0.0875332	u	1
414	TCONS_00009036	XLOC_003053	SDOW01000019.1	6422551	6423866	+	339	0.634218	-0.311628	u	2
415	TCONS_00009044	XLOC_003058	SDOW01000019.1	7030713	7036906	+	604	0.415563	0.0358566	u	3
416	TCONS_00009116	XLOC_003090	SDOW01000019.1	1414810	1418713	-	1481	0.469278	0.0417266	u	3
417	TCONS_00009140	XLOC_003104	SDOW01000019.1	3477106	3480321	-	1533	0.392042	0.0183028	u	6
418	TCONS_00009141	XLOC_003104	SDOW01000019.1	3477106	3480321	-	1016	0.464567	-0.0338983	u	5
419	TCONS_00009142	XLOC_003104	SDOW01000019.1	3477106	3480321	-	1659	0.414708	-0.0465116	u	5
420	TCONS_00009143	XLOC_003104	SDOW01000019.1	3477106	3480321	-	1678	0.417759	-0.0413695	u	5
421	TCONS_00009157	XLOC_003111	SDOW01000019.1	4645611	4649909	-	570	0.415789	-0.206751	u	1
422	TCONS_00009191	XLOC_003126	SDOW01000019.1	529906	530146	.	240	0.5125	-0.0731707	u	1
423	TCONS_00009192	XLOC_003127	SDOW01000019.1	4848277	4848598	.	321	0.570093	0.256831	u	1
424	TCONS_00009204	XLOC_003129	SDOW01000020.1	664384	667611	+	1273	0.556952	0.0521862	o	5
425	TCONS_00009205	XLOC_003129	SDOW01000020.1	664384	667611	+	1245	0.560643	0.0458453	o	5
426	TCONS_00009307	XLOC_003164	SDOW01000020.1	3642644	3645173	+	936	0.469017	0.175399	u	2
427	TCONS_00009308	XLOC_003164	SDOW01000020.1	3642644	3645173	+	540	0.551852	0.0872483	u	1
428	TCONS_00009309	XLOC_003164	SDOW01000020.1	3642644	3645173	+	838	0.457041	0.148825	u	2
429	TCONS_00009310	XLOC_003164	SDOW01000020.1	3642644	3645173	+	1181	0.38696	0.0547046	u	1
430	TCONS_00009324	XLOC_003167	SDOW01000020.1	4148946	4153109	+	770	0.518182	-0.0476191	o	2
431	TCONS_00009381	XLOC_003187	SDOW01000020.1	7141826	7144349	+	852	0.483568	-0.0873786	u	4
432	TCONS_00009382	XLOC_003187	SDOW01000020.1	7141826	7144349	+	1395	0.431541	-0.0598007	u	3
433	TCONS_00009383	XLOC_003187	SDOW01000020.1	7141826	7144349	+	898	0.477728	-0.0582751	u	4
434	TCONS_00009384	XLOC_003187	SDOW01000020.1	7141826	7144349	+	1441	0.429563	-0.0403877	u	3
435	TCONS_00009385	XLOC_003187	SDOW01000020.1	7141826	7144349	+	1167	0.443016	-0.0638298	u	3
436	TCONS_00009387	XLOC_003187	SDOW01000020.1	7141826	7144349	+	1937	0.396489	-0.0416667	u	1
437	TCONS_00009388	XLOC_003187	SDOW01000020.1	7141826	7144349	+	860	0.477907	-0.0559611	u	4
438	TCONS_00009394	XLOC_003192	SDOW01000020.1	7471589	7475242	+	414	0.410628	0.0235294	u	4
439	TCONS_00009434	XLOC_003203	SDOW01000020.1	8344987	8345663	+	466	0.682403	-0.220126	o	3
440	TCONS_00009457	XLOC_003211	SDOW01000020.1	8769670	8775742	+	581	0.402754	0.0854701	u	2
441	TCONS_00009543	XLOC_003245	SDOW01000020.1	3652113	3652689	-	327	0.550459	-0.277778	u	2
442	TCONS_00009561	XLOC_003250	SDOW01000020.1	4822046	4829613	-	5803	0.413235	0.0250209	j	5
443	TCONS_00009669	XLOC_003281	SDOW01000020.1	7141826	7144349	-	382	0.612565	0.213675	u	2
444	TCONS_00009696	XLOC_003295	SDOW01000020.1	8435704	8440539	-	460	0.493478	-0.0748899	x	2
445	TCONS_00009697	XLOC_003295	SDOW01000020.1	8435704	8440539	-	450	0.471111	-0.0849057	u	2
446	TCONS_00009700	XLOC_003298	SDOW01000020.1	8578427	8579605	-	1093	0.414456	-0.0419426	u	2
447	TCONS_00009712	XLOC_003306	SDOW01000020.1	1093866	1094212	.	346	0.679191	-0.191489	u	1
448	TCONS_00009713	XLOC_003307	SDOW01000020.1	1724514	1731994	.	540	0.45	-0.0123457	u	1
449	TCONS_00009714	XLOC_003308	SDOW01000020.1	2402132	2402514	.	382	0.5	-0.0052356	u	1
450	TCONS_00009716	XLOC_003310	SDOW01000020.1	3646758	3647032	.	274	0.412409	-0.0973451	u	1
451	TCONS_00009717	XLOC_003311	SDOW01000020.1	4072006	4073285	.	1279	0.63018	0.228288	u	1
452	TCONS_00009718	XLOC_003312	SDOW01000020.1	5796672	5797627	.	955	0.639791	-0.306056	u	1
453	TCONS_00009719	XLOC_003313	SDOW01000020.1	8593842	8594167	.	325	0.403077	-0.19084	u	1
454	TCONS_00009871	XLOC_003363	SDOW01000021.1	356760	358551	-	510	0.509804	0.107692	j	2
455	TCONS_00009872	XLOC_003363	SDOW01000021.1	356760	358551	-	1658	0.527141	0.00457666	j	2
456	TCONS_00009934	XLOC_003392	SDOW01000021.1	4474707	4477641	-	1371	0.447848	0.143322	u	2
457	TCONS_00009935	XLOC_003392	SDOW01000021.1	4474707	4477641	-	1156	0.556228	0.0419907	u	3
458	TCONS_00009938	XLOC_003392	SDOW01000021.1	4474707	4477641	-	813	0.479705	0.241026	u	1
459	TCONS_00009967	XLOC_003401	SDOW01000021.1	5224822	5226337	-	519	0.520231	-0.214815	u	2
460	TCONS_00010007	XLOC_003416	SDOW01000021.1	784151	784714	.	563	0.602131	-0.0737463	u	1
461	TCONS_00010010	XLOC_003419	SDOW01000021.1	6477585	6477909	.	324	0.441358	0.0489511	u	1
462	TCONS_00010147	XLOC_003459	SDOW01000022.1	4459417	4463438	+	873	0.449026	-0.0663265	o	5
463	TCONS_00010149	XLOC_003459	SDOW01000022.1	4459417	4463438	+	1256	0.453822	-0.00350877	o	7
464	TCONS_00010151	XLOC_003459	SDOW01000022.1	4459417	4463438	+	1099	0.44313	0.0143737	u	6
465	TCONS_00010152	XLOC_003459	SDOW01000022.1	4459417	4463438	+	1113	0.415094	0.034632	u	3
466	TCONS_00010171	XLOC_003468	SDOW01000022.1	5433141	5438555	+	3891	0.430224	0.0274791	j	3
467	TCONS_00010184	XLOC_003473	SDOW01000022.1	5897244	5902931	+	797	0.421581	0.0654762	u	1
468	TCONS_00010357	XLOC_003561	SDOW01000022.1	2144389	2144600	.	211	0.554502	-0.299145	u	1
469	TCONS_00010358	XLOC_003562	SDOW01000022.1	3579994	3580466	.	472	0.652542	-0.00649351	u	1
470	TCONS_00010449	XLOC_003583	SDOW01000023.1	1984367	1988398	+	1468	0.401226	-0.178268	u	2
471	TCONS_00010521	XLOC_003607	SDOW01000023.1	3976438	3982658	+	2661	0.434423	0.0346021	u	8
472	TCONS_00010584	XLOC_003621	SDOW01000023.1	6296342	6299969	+	3194	0.491234	-0.0388783	j	2
473	TCONS_00010695	XLOC_003661	SDOW01000023.1	5212773	5226566	-	723	0.437068	0.0506329	u	2
474	TCONS_00010696	XLOC_003661	SDOW01000023.1	5212773	5226566	-	792	0.444444	0.0511364	u	2
475	TCONS_00010724	XLOC_003674	SDOW01000023.1	1625653	1625966	.	313	0.495208	0.0193548	u	1
476	TCONS_00010728	XLOC_003678	SDOW01000023.1	4068342	4069611	.	1269	0.459417	-0.0943396	u	1
477	TCONS_00010729	XLOC_003679	SDOW01000023.1	5211202	5211858	.	656	0.516768	-0.156342	u	1
478	TCONS_00010730	XLOC_003680	SDOW01000023.1	5947461	5947947	.	486	0.623457	-0.0495049	u	1
479	TCONS_00010747	XLOC_003688	SDOW01000024.1	1684464	1687971	+	776	0.510309	-0.116162	u	1
480	TCONS_00010748	XLOC_003688	SDOW01000024.1	1684464	1687971	+	281	0.629893	-0.152542	u	2
481	TCONS_00010749	XLOC_003688	SDOW01000024.1	1684464	1687971	+	398	0.454774	-0.292818	u	1
482	TCONS_00010760	XLOC_003691	SDOW01000024.1	2084734	2087193	+	1901	0.530247	-0.0257937	u	4
483	TCONS_00010761	XLOC_003691	SDOW01000024.1	2084734	2087193	+	2162	0.510638	-0.0380435	u	3
484	TCONS_00010762	XLOC_003691	SDOW01000024.1	2084734	2087193	+	1272	0.601415	-0.0222222	u	4
485	TCONS_00010763	XLOC_003691	SDOW01000024.1	2084734	2087193	+	1627	0.556853	-0.0264901	u	4
486	TCONS_00010764	XLOC_003691	SDOW01000024.1	2084734	2087193	+	1896	0.530063	-0.0248756	u	4
487	TCONS_00010765	XLOC_003691	SDOW01000024.1	2084734	2087193	+	1387	0.586878	-0.00982801	u	5
488	TCONS_00010766	XLOC_003691	SDOW01000024.1	2084734	2087193	+	2376	0.498316	-0.0523649	u	2
489	TCONS_00010768	XLOC_003691	SDOW01000024.1	2084734	2087193	+	2167	0.510844	-0.0388437	u	3
490	TCONS_00010796	XLOC_003699	SDOW01000024.1	3871585	3874207	+	1056	0.482955	0.00784314	o	2
491	TCONS_00010866	XLOC_003722	SDOW01000024.1	743522	747367	-	1631	0.502759	-0.0170732	j	4
492	TCONS_00010938	XLOC_003746	SDOW01000024.1	3871585	3874207	-	727	0.541953	0.274112	x	2
493	TCONS_00011010	XLOC_003772	SDOW01000024.1	1689109	1690376	.	1267	0.494081	0.0638978	u	1
494	TCONS_00011011	XLOC_003773	SDOW01000024.1	1690640	1691964	.	1324	0.357251	-0.0443975	u	1
495	TCONS_00011012	XLOC_003774	SDOW01000024.1	1693514	1694169	.	655	0.351145	0.13913	u	1
496	TCONS_00011013	XLOC_003775	SDOW01000024.1	1695566	1696269	.	703	0.405405	-0.0526316	u	1
497	TCONS_00011014	XLOC_003776	SDOW01000024.1	1696765	1697417	.	652	0.434049	-0.0106007	u	1
498	TCONS_00011016	XLOC_003778	SDOW01000024.1	5110111	5111187	.	1076	0.501859	0.107407	u	1
499	TCONS_00011058	XLOC_003794	SDOW01000025.1	1919766	1923711	+	1049	0.419447	0.0545455	u	5
500	TCONS_00011218	XLOC_003860	SDOW01000025.1	1351548	1353019	-	1164	0.526632	-0.0897227	u	2
501	TCONS_00011220	XLOC_003860	SDOW01000025.1	1351548	1353019	-	1170	0.525641	-0.0894309	u	2
502	TCONS_00011249	XLOC_003871	SDOW01000025.1	2649092	2651093	-	1019	0.366045	0.104558	u	2
503	TCONS_00011251	XLOC_003871	SDOW01000025.1	2649092	2651093	-	820	0.356098	0.0684932	u	4
504	TCONS_00011252	XLOC_003871	SDOW01000025.1	2649092	2651093	-	701	0.345221	0.0578512	u	3
505	TCONS_00011376	XLOC_003910	SDOW01000025.1	8483382	8485970	-	635	0.48189	0.00653595	u	2
506	TCONS_00011410	XLOC_003921	SDOW01000025.1	9595363	9599131	-	532	0.456767	-0.135802	u	1
507	TCONS_00011417	XLOC_003924	SDOW01000025.1	240018	240503	.	485	0.698969	-0.179941	u	1
508	TCONS_00011419	XLOC_003926	SDOW01000025.1	3161703	3163640	.	1937	0.505421	-0.00306435	u	1
509	TCONS_00011575	XLOC_003979	SDOW01000026.1	1728950	1732258	-	1000	0.523	-0.0478012	u	2
510	TCONS_00011616	XLOC_003996	SDOW01000026.1	3934398	3934942	-	438	0.52968	-0.0603448	u	2
511	TCONS_00011698	XLOC_004017	SDOW01000026.1	6204581	6207098	-	410	0.465854	0.0994764	u	3
512	TCONS_00011725	XLOC_004024	SDOW01000026.1	5435995	5436516	.	521	0.700576	0.117808	u	1
513	TCONS_00011726	XLOC_004025	SDOW01000026.1	5714181	5714658	.	477	0.530398	0.15415	u	1
514	TCONS_00011735	XLOC_004030	SDOW01000027.1	316183	316934	+	329	0.504559	0.0120482	u	2
515	TCONS_00011755	XLOC_004037	SDOW01000027.1	630834	632294	+	570	0.496491	0.0176678	u	2
516	TCONS_00011756	XLOC_004038	SDOW01000027.1	634203	635515	+	834	0.520384	-0.0875576	u	2
517	TCONS_00011757	XLOC_004038	SDOW01000027.1	634203	635515	+	879	0.513083	-0.0731707	u	3
518	TCONS_00011822	XLOC_004052	SDOW01000027.1	1284148	1284537	+	300	0.72	-0.185185	u	2
519	TCONS_00011824	XLOC_004053	SDOW01000027.1	1284632	1286597	+	617	0.432739	0.116105	u	2
520	TCONS_00011870	XLOC_004069	SDOW01000027.1	1681823	1685516	+	602	0.657807	0.121212	u	4
521	TCONS_00012011	XLOC_004097	SDOW01000027.1	3080899	3084240	+	1509	0.510272	-0.135065	u	1
522	TCONS_00012204	XLOC_004162	SDOW01000027.1	579016	591020	-	583	0.566038	-0.0242424	u	3
523	TCONS_00012211	XLOC_004165	SDOW01000027.1	620960	630773	-	2175	0.441379	0.0979167	j	2
524	TCONS_00012212	XLOC_004165	SDOW01000027.1	620960	630773	-	1893	0.456947	0.112139	j	3
525	TCONS_00012425	XLOC_004228	SDOW01000027.1	3227620	3228654	-	952	0.512605	-0.0491803	u	2
526	TCONS_00012498	XLOC_004255	SDOW01000027.1	4691403	4696931	-	780	0.460256	0.181059	u	3
527	TCONS_00012499	XLOC_004255	SDOW01000027.1	4691403	4696931	-	792	0.459596	0.164835	u	3
528	TCONS_00012511	XLOC_004262	SDOW01000027.1	5571943	5582844	-	2899	0.468437	0.0500736	u	5
529	TCONS_00012582	XLOC_004283	SDOW01000027.1	92084	92660	.	576	0.625	-0.122222	u	1
530	TCONS_00012583	XLOC_004284	SDOW01000027.1	607332	607560	.	228	0.513158	-0.0940171	u	1
531	TCONS_00012585	XLOC_004286	SDOW01000027.1	1279561	1279792	.	231	0.606061	-0.371429	u	1
532	TCONS_00012586	XLOC_004287	SDOW01000027.1	1681823	1685516	.	783	0.537676	-0.0308789	u	1
533	TCONS_00012587	XLOC_004288	SDOW01000027.1	1681823	1685516	.	306	0.424837	0.0923077	u	1
534	TCONS_00012588	XLOC_004289	SDOW01000027.1	1681823	1685516	.	255	0.533333	0.132353	u	1
535	TCONS_00012591	XLOC_004292	SDOW01000027.1	3382063	3382732	.	669	0.472347	-0.0759494	u	1
536	TCONS_00012593	XLOC_004294	SDOW01000027.1	6483320	6484131	.	811	0.554871	-0.0444444	u	1
537	TCONS_00012594	XLOC_004295	SDOW01000027.1	6590857	6591318	.	461	0.655098	-0.198676	u	1
538	TCONS_00012679	XLOC_004333	SDOW01000028.1	7242580	7246833	+	307	0.602606	-0.254054	x	3
539	TCONS_00012774	XLOC_004369	SDOW01000028.1	5038856	5042574	-	837	0.578256	-0.198347	u	2
540	TCONS_00012775	XLOC_004369	SDOW01000028.1	5038856	5042574	-	498	0.620482	-0.404531	u	2
541	TCONS_00012860	XLOC_004388	SDOW01000028.1	7716561	7722624	-	886	0.586907	0.123077	u	4
542	TCONS_00012863	XLOC_004390	SDOW01000028.1	3260797	3261626	.	829	0.558504	-0.0842333	u	1
543	TCONS_00012864	XLOC_004391	SDOW01000028.1	3893492	3894185	.	693	0.427128	0.189189	u	1
544	TCONS_00012865	XLOC_004392	SDOW01000028.1	6144035	6144473	.	438	0.33105	0.0482759	u	1
545	TCONS_00012866	XLOC_004393	SDOW01000028.1	7248179	7248729	.	550	0.627273	0.0608696	u	1
546	TCONS_00012945	XLOC_004425	SDOW01000029.1	4876212	4885925	+	1996	0.544088	0.0092081	j	4
547	TCONS_00013010	XLOC_004456	SDOW01000029.1	1969349	1975802	-	1032	0.407946	0.154394	u	4
548	TCONS_00013011	XLOC_004456	SDOW01000029.1	1969349	1975802	-	325	0.430769	0.214286	u	4
549	TCONS_00013160	XLOC_004509	SDOW01000029.1	1276570	1277196	.	626	0.351438	0.1	u	1
550	TCONS_00013164	XLOC_004513	SDOW01000029.1	1949811	1950219	.	408	0.659314	-0.0408922	u	1
551	TCONS_00013165	XLOC_004514	SDOW01000029.1	1951473	1952452	.	979	0.496425	-0.0164609	u	1
552	TCONS_00013166	XLOC_004515	SDOW01000029.1	1952915	1954252	.	1337	0.5273	0.131915	u	1
553	TCONS_00013169	XLOC_004518	SDOW01000029.1	2006650	2007296	.	646	0.524768	0.0147493	u	1
554	TCONS_00013170	XLOC_004519	SDOW01000029.1	5035936	5041878	.	502	0.418327	-0.209524	u	1
555	TCONS_00013171	XLOC_004520	SDOW01000029.1	5042159	5043288	.	1129	0.472985	-0.213483	u	1
556	TCONS_00013172	XLOC_004521	SDOW01000029.1	6815188	6815755	.	567	0.587302	-0.123123	u	1
557	TCONS_00013173	XLOC_004522	SDOW01000029.1	6828435	6829165	.	730	0.560274	-0.158924	u	1
558	TCONS_00013186	XLOC_004529	SDOW01000030.1	1097212	1099960	+	704	0.419034	0.0711864	u	3
559	TCONS_00013193	XLOC_004533	SDOW01000030.1	1691879	1694784	+	1283	0.498831	0.115625	o	2
560	TCONS_00013194	XLOC_004533	SDOW01000030.1	1691879	1694784	+	801	0.593009	0.12	o	2
561	TCONS_00013198	XLOC_004535	SDOW01000030.1	1726125	1731816	+	755	0.438411	0.135952	o	2
562	TCONS_00013239	XLOC_004554	SDOW01000030.1	4033456	4039730	+	646	0.603715	-0.0615385	x	3
563	TCONS_00013296	XLOC_004571	SDOW01000030.1	4662396	4664510	+	915	0.547541	0.157685	j	2
564	TCONS_00013299	XLOC_004572	SDOW01000030.1	4665842	4668034	+	806	0.504963	-0.0859951	j	3
565	TCONS_00013317	XLOC_004579	SDOW01000030.1	4813162	4815702	+	954	0.530398	0.0869565	o	3
566	TCONS_00013450	XLOC_004619	SDOW01000030.1	2009455	2015892	-	3047	0.418116	0.0784929	j	4
567	TCONS_00013479	XLOC_004630	SDOW01000030.1	4127377	4129680	-	2211	0.4654	0.0184645	j	2
568	TCONS_00013505	XLOC_004642	SDOW01000030.1	4662396	4664510	-	455	0.483516	-0.0818182	x	2
569	TCONS_00013506	XLOC_004643	SDOW01000030.1	4801591	4804496	-	1180	0.410169	0.0247934	u	5
570	TCONS_00013507	XLOC_004643	SDOW01000030.1	4801591	4804496	-	963	0.455867	0.047836	u	8
571	TCONS_00013508	XLOC_004643	SDOW01000030.1	4801591	4804496	-	719	0.489569	-0.0511364	u	6
572	TCONS_00013509	XLOC_004643	SDOW01000030.1	4801591	4804496	-	1050	0.497143	-0.0651341	u	9
573	TCONS_00013515	XLOC_004646	SDOW01000030.1	5085389	5090852	-	762	0.582677	-0.0675676	u	2
574	TCONS_00013576	XLOC_004659	SDOW01000030.1	7583994	7588478	-	1054	0.496205	-0.1587	u	4
575	TCONS_00013627	XLOC_004676	SDOW01000030.1	368629	369598	.	969	0.603715	0.329915	u	1
576	TCONS_00013629	XLOC_004678	SDOW01000030.1	4700013	4701390	.	1377	0.496732	-0.0146199	u	1
577	TCONS_00013631	XLOC_004680	SDOW01000030.1	7233696	7234106	.	410	0.629268	0.255814	u	1
578	TCONS_00013632	XLOC_004681	SDOW01000030.1	10507191	10508136	.	945	0.473016	0.064877	u	1
579	TCONS_00013638	XLOC_004685	SDOW01000031.1	459761	460907	+	1010	0.564356	-0.203509	u	1
580	TCONS_00013639	XLOC_004685	SDOW01000031.1	459761	460907	+	802	0.609726	-0.218814	u	2
581	TCONS_00013658	XLOC_004693	SDOW01000031.1	1308139	1308986	+	507	0.510848	-0.011583	u	4
582	TCONS_00013669	XLOC_004696	SDOW01000031.1	1876755	1880121	+	3265	0.435528	0.0393812	j	2
583	TCONS_00013727	XLOC_004706	SDOW01000031.1	2558614	2562970	+	3277	0.428441	0.0811966	j	4
584	TCONS_00013737	XLOC_004711	SDOW01000031.1	2994361	2997343	+	1005	0.492537	0.0222222	u	2
585	TCONS_00013738	XLOC_004711	SDOW01000031.1	2994361	2997343	+	999	0.496496	0.0282258	u	2
586	TCONS_00013823	XLOC_004741	SDOW01000031.1	1009974	1011630	-	648	0.510802	-0.214502	u	2
587	TCONS_00013893	XLOC_004763	SDOW01000031.1	2990134	2991689	-	762	0.496063	-0.174603	u	3
588	TCONS_00014002	XLOC_004793	SDOW01000031.1	774069	774454	.	385	0.384416	0.0945946	u	1
589	TCONS_00014004	XLOC_004795	SDOW01000031.1	1307735	1308055	.	320	0.7375	-0.271186	u	1
590	TCONS_00014005	XLOC_004796	SDOW01000031.1	1309118	1309435	.	317	0.394322	0.008	u	1
591	TCONS_00014006	XLOC_004797	SDOW01000031.1	2989202	2989876	.	674	0.378338	-0.0901961	u	1
592	TCONS_00014092	XLOC_004819	SDOW01000032.1	3057101	3060809	+	1656	0.391304	-0.0648148	u	2
593	TCONS_00014104	XLOC_004824	SDOW01000032.1	4167443	4168293	+	369	0.457995	0.183432	u	1
594	TCONS_00014106	XLOC_004825	SDOW01000032.1	4307134	4309884	+	2293	0.422154	-0.0826446	j	4
595	TCONS_00014141	XLOC_004831	SDOW01000032.1	5320543	5329432	+	348	0.706897	0.097561	u	2
596	TCONS_00014297	XLOC_004892	SDOW01000032.1	1275679	1277132	-	1036	0.549228	-0.026362	u	4
597	TCONS_00014311	XLOC_004900	SDOW01000032.1	2485595	2492809	-	633	0.4297	0.0514706	u	1
598	TCONS_00014369	XLOC_004906	SDOW01000032.1	3150962	3153061	-	1915	0.430809	0.0763636	j	3
599	TCONS_00014390	XLOC_004917	SDOW01000032.1	4108501	4114069	-	859	0.488941	-0.0238095	o	4
600	TCONS_00014404	XLOC_004924	SDOW01000032.1	4814210	4815551	-	672	0.537202	0.124654	u	2
601	TCONS_00014440	XLOC_004936	SDOW01000032.1	6550336	6554813	-	1288	0.513975	-0.0422961	j	5
602	TCONS_00014479	XLOC_004954	SDOW01000032.1	8915384	8922380	-	936	0.479701	-0.00668151	x	3
603	TCONS_00014481	XLOC_004954	SDOW01000032.1	8915384	8922380	-	445	0.525843	-0.0598291	u	1
604	TCONS_00014566	XLOC_004988	SDOW01000032.1	4567119	4567525	.	406	0.480296	0.271795	u	1
605	TCONS_00014567	XLOC_004989	SDOW01000032.1	5319999	5320315	.	316	0.360759	0.0175439	u	1
606	TCONS_00014568	XLOC_004990	SDOW01000032.1	6117266	6118414	.	1148	0.617596	-0.114245	u	1
607	TCONS_00014569	XLOC_004991	SDOW01000032.1	9030091	9033169	.	628	0.488854	-0.166124	u	1
608	TCONS_00014570	XLOC_004992	SDOW01000032.1	9580649	9580942	.	293	0.498294	-0.0410959	u	1
609	TCONS_00014571	XLOC_004993	SDOW01000032.1	9729719	9730168	.	449	0.42539	0.172775	u	1
610	TCONS_00014576	XLOC_004995	SDOW01000033.1	452635	457303	+	2132	0.437148	-0.0600858	u	9
611	TCONS_00014582	XLOC_004997	SDOW01000033.1	577097	579500	+	2247	0.496662	-0.0949821	u	2
612	TCONS_00014610	XLOC_005001	SDOW01000033.1	811353	818279	+	1306	0.398928	0.0134357	x	2
613	TCONS_00014611	XLOC_005001	SDOW01000033.1	811353	818279	+	789	0.444867	0.162393	x	3
614	TCONS_00014634	XLOC_005012	SDOW01000033.1	2266830	2271772	+	3235	0.438022	-0.0134086	u	4
615	TCONS_00014635	XLOC_005012	SDOW01000033.1	2266830	2271772	+	3074	0.438842	0.00518903	u	5
616	TCONS_00014637	XLOC_005012	SDOW01000033.1	2266830	2271772	+	2771	0.458318	-0.0299213	u	5
617	TCONS_00014639	XLOC_005012	SDOW01000033.1	2266830	2271772	+	2493	0.45728	-0.0105263	u	5
618	TCONS_00014640	XLOC_005012	SDOW01000033.1	2266830	2271772	+	2495	0.467735	0.0197087	u	5
619	TCONS_00014641	XLOC_005012	SDOW01000033.1	2266830	2271772	+	2096	0.476145	-0.0160321	u	4
620	TCONS_00014642	XLOC_005012	SDOW01000033.1	2266830	2271772	+	1769	0.503674	0.010101	u	5
621	TCONS_00014698	XLOC_005038	SDOW01000033.1	6805748	6807017	+	806	0.511166	-0.131068	u	1
622	TCONS_00014699	XLOC_005038	SDOW01000033.1	6805748	6807017	+	829	0.513872	-0.0938967	u	2
623	TCONS_00014700	XLOC_005038	SDOW01000033.1	6805748	6807017	+	802	0.511222	-0.097561	u	2
624	TCONS_00014733	XLOC_005050	SDOW01000033.1	8553656	8555322	+	427	0.435597	0.247312	u	2
625	TCONS_00014781	XLOC_005063	SDOW01000033.1	973718	974524	-	695	0.398561	0.0108303	u	2
626	TCONS_00014793	XLOC_005069	SDOW01000033.1	2169707	2170836	-	490	0.47551	0.141631	u	2
627	TCONS_00014794	XLOC_005069	SDOW01000033.1	2169707	2170836	-	444	0.468468	0.201923	u	2
628	TCONS_00014797	XLOC_005072	SDOW01000033.1	2420276	2423481	-	458	0.401747	-0.184783	x	2
629	TCONS_00014810	XLOC_005081	SDOW01000033.1	4074803	4078229	-	885	0.39887	-0.0481586	u	1
630	TCONS_00014811	XLOC_005081	SDOW01000033.1	4074803	4078229	-	981	0.432212	-0.0896226	u	2
631	TCONS_00014819	XLOC_005083	SDOW01000033.1	4210840	4211395	-	476	0.531513	-0.13834	u	2
632	TCONS_00014836	XLOC_005092	SDOW01000033.1	5978262	5980168	-	410	0.590244	-0.446281	u	2
633	TCONS_00014845	XLOC_005099	SDOW01000033.1	7121050	7124341	-	3291	0.517472	-0.0275984	u	1
634	TCONS_00014846	XLOC_005099	SDOW01000033.1	7121050	7124341	-	1515	0.588119	-0.104377	u	2
635	TCONS_00014890	XLOC_005120	SDOW01000033.1	971969	972176	.	207	0.429952	-0.0337079	u	1
636	TCONS_00014893	XLOC_005123	SDOW01000033.1	3034516	3035181	.	665	0.62406	0.315663	u	1
637	TCONS_00014894	XLOC_005124	SDOW01000033.1	4071213	4071482	.	269	0.33829	-0.0769231	u	1
638	TCONS_00014895	XLOC_005125	SDOW01000033.1	4074803	4078229	.	507	0.583826	-0.412162	u	1
639	TCONS_00014896	XLOC_005126	SDOW01000033.1	4497164	4498245	.	1081	0.580019	-0.250399	u	1
640	TCONS_00014897	XLOC_005127	SDOW01000033.1	4871180	4871846	.	666	0.542042	-0.185596	u	1
641	TCONS_00014898	XLOC_005128	SDOW01000033.1	4873523	4874056	.	533	0.489681	-0.0957854	u	1
642	TCONS_00014899	XLOC_005129	SDOW01000033.1	5358639	5359174	.	535	0.661682	-0.254237	u	1
643	TCONS_00014901	XLOC_005131	SDOW01000033.1	6237912	6238387	.	475	0.663158	0.149206	u	1
644	TCONS_00014902	XLOC_005132	SDOW01000033.1	8984245	8986442	.	2197	0.427856	0.00851064	u	1
645	TCONS_00014947	XLOC_005158	SDOW01000034.1	5903711	5907271	+	382	0.617801	-0.211864	u	2
646	TCONS_00014948	XLOC_005158	SDOW01000034.1	5903711	5907271	+	698	0.541547	-0.121693	u	2
647	TCONS_00014996	XLOC_005176	SDOW01000034.1	4417694	4423784	-	791	0.484197	0.232376	o	3
648	TCONS_00015006	XLOC_005179	SDOW01000034.1	5810967	5814073	-	2893	0.409609	0.0902954	j	3
649	TCONS_00015012	XLOC_005182	SDOW01000034.1	4041149	4041555	.	406	0.490148	-0.0954774	u	1
650	TCONS_00015013	XLOC_005183	SDOW01000034.1	4417694	4423784	.	444	0.34009	-0.258278	u	1
651	TCONS_00015044	XLOC_005196	SDOW01000035.1	2118943	2120056	+	340	0.564706	0.0625	u	2
652	TCONS_00015109	XLOC_005227	SDOW01000035.1	5023835	5027361	-	721	0.47018	-0.0383481	u	4
653	TCONS_00015110	XLOC_005227	SDOW01000035.1	5023835	5027361	-	1019	0.487733	-0.162978	u	3
654	TCONS_00015111	XLOC_005227	SDOW01000035.1	5023835	5027361	-	871	0.492537	-0.202797	u	3
655	TCONS_00015129	XLOC_005237	SDOW01000035.1	3428205	3428837	.	632	0.618671	0.171355	u	1
656	TCONS_00015130	XLOC_005238	SDOW01000035.1	3667848	3668365	.	517	0.45648	-0.118644	u	1
657	TCONS_00015131	XLOC_005239	SDOW01000035.1	5603670	5604367	.	697	0.582496	0.17734	u	1
658	TCONS_00015231	XLOC_005271	SDOW01000036.1	1693710	1695984	+	821	0.634592	-0.182342	u	5
659	TCONS_00015233	XLOC_005272	SDOW01000036.1	1703219	1705770	+	625	0.424	0.0339623	u	2
660	TCONS_00015349	XLOC_005304	SDOW01000036.1	3764342	3765394	+	923	0.576381	-0.18797	u	2
661	TCONS_00015360	XLOC_005310	SDOW01000036.1	4502321	4506201	+	491	0.596741	-0.0580205	u	4
662	TCONS_00015445	XLOC_005338	SDOW01000036.1	5957290	5957773	+	372	0.723118	-0.0557621	u	2
663	TCONS_00015478	XLOC_005353	SDOW01000036.1	7268963	7273106	+	1830	0.430055	-0.0165184	u	4
664	TCONS_00015479	XLOC_005353	SDOW01000036.1	7268963	7273106	+	1050	0.47619	-0.004	u	5
665	TCONS_00015480	XLOC_005353	SDOW01000036.1	7268963	7273106	+	1046	0.476099	-0.00803213	u	5
666	TCONS_00015481	XLOC_005353	SDOW01000036.1	7268963	7273106	+	1521	0.439842	-0.0224215	u	4
667	TCONS_00015482	XLOC_005353	SDOW01000036.1	7268963	7273106	+	1320	0.459848	-0.0378913	u	5
668	TCONS_00015483	XLOC_005353	SDOW01000036.1	7268963	7273106	+	1079	0.463392	-0.004	u	4
669	TCONS_00015484	XLOC_005353	SDOW01000036.1	7268963	7273106	+	1170	0.471795	-0.0398551	u	4
670	TCONS_00015485	XLOC_005353	SDOW01000036.1	7268963	7273106	+	1526	0.440367	-0.0208333	u	4
671	TCONS_00015577	XLOC_005384	SDOW01000036.1	1923295	1930021	-	3854	0.401401	0.0691661	u	6
672	TCONS_00015578	XLOC_005384	SDOW01000036.1	1923295	1930021	-	4398	0.404957	0.0701853	u	6
673	TCONS_00015584	XLOC_005384	SDOW01000036.1	1923295	1930021	-	4080	0.433578	0.0356133	u	7
674	TCONS_00015585	XLOC_005384	SDOW01000036.1	1923295	1930021	-	4066	0.433842	0.0351474	u	7
675	TCONS_00015586	XLOC_005384	SDOW01000036.1	1923295	1930021	-	4887	0.425824	0.0389236	u	6
676	TCONS_00015588	XLOC_005384	SDOW01000036.1	1923295	1930021	-	4004	0.441808	0.0491803	u	5
677	TCONS_00015590	XLOC_005384	SDOW01000036.1	1923295	1930021	-	4087	0.433815	0.036661	u	7
678	TCONS_00015591	XLOC_005384	SDOW01000036.1	1923295	1930021	-	4154	0.43091	0.049162	u	6
679	TCONS_00015595	XLOC_005384	SDOW01000036.1	1923295	1930021	-	2604	0.473886	0.0437601	u	7
680	TCONS_00015633	XLOC_005403	SDOW01000036.1	3327108	3332822	-	1587	0.415249	0.00455235	x	2
681	TCONS_00015694	XLOC_005415	SDOW01000036.1	3998190	4000562	-	1105	0.591855	0.152905	u	3
682	TCONS_00015771	XLOC_005436	SDOW01000036.1	5055006	5057175	-	525	0.462857	0.135802	u	4
683	TCONS_00015772	XLOC_005436	SDOW01000036.1	5055006	5057175	-	926	0.553996	0.0604288	u	6
684	TCONS_00015775	XLOC_005437	SDOW01000036.1	5129820	5135391	-	1354	0.530281	0	j	5
685	TCONS_00015776	XLOC_005437	SDOW01000036.1	5129820	5135391	-	1355	0.523985	0.028169	j	8
686	TCONS_00015777	XLOC_005437	SDOW01000036.1	5129820	5135391	-	4324	0.431314	0.0337802	j	6
687	TCONS_00015780	XLOC_005437	SDOW01000036.1	5129820	5135391	-	1518	0.52635	-0.00625782	j	5
688	TCONS_00015855	XLOC_005467	SDOW01000036.1	530344	536716	.	1399	0.436741	-0.0605565	u	1
689	TCONS_00015857	XLOC_005469	SDOW01000036.1	1067640	1068380	.	740	0.544595	0.295285	u	1
690	TCONS_00015858	XLOC_005470	SDOW01000036.1	2587081	2587873	.	792	0.492424	0.0717949	u	1
691	TCONS_00015859	XLOC_005471	SDOW01000036.1	3456007	3456383	.	376	0.593085	-0.103139	u	1
692	TCONS_00015860	XLOC_005472	SDOW01000036.1	3456456	3456848	.	392	0.711735	-0.0322581	u	1
693	TCONS_00015861	XLOC_005473	SDOW01000036.1	3565909	3566520	.	611	0.384615	0.0468085	u	1
694	TCONS_00015862	XLOC_005474	SDOW01000036.1	3567009	3567852	.	843	0.469751	0.0656566	u	1
695	TCONS_00015863	XLOC_005475	SDOW01000036.1	3994681	3996996	.	2315	0.491145	-0.00263852	u	1
696	TCONS_00015864	XLOC_005476	SDOW01000036.1	4002026	4002619	.	593	0.591906	-0.133903	u	1
697	TCONS_00015865	XLOC_005477	SDOW01000036.1	5956917	5957176	.	259	0.718147	0.0537634	u	1
698	TCONS_00015866	XLOC_005478	SDOW01000036.1	6144286	6144554	.	268	0.429104	-0.130435	u	1
699	TCONS_00015867	XLOC_005479	SDOW01000036.1	6617028	6617314	.	286	0.63986	-0.191257	u	1
700	TCONS_00015868	XLOC_005480	SDOW01000036.1	7175493	7176455	.	962	0.601871	0.0431779	u	1
701	TCONS_00015869	XLOC_005481	SDOW01000036.1	7182113	7182471	.	358	0.539106	-0.0880829	u	1
702	TCONS_00015871	XLOC_005483	SDOW01000037.1	196412	197259	+	759	0.447958	0.0294118	u	2
703	TCONS_00015892	XLOC_005492	SDOW01000037.1	995603	1006027	+	1168	0.541952	0.00473934	u	3
704	TCONS_00015905	XLOC_005492	SDOW01000037.1	995603	1006027	+	927	0.349515	-0.00617284	u	1
705	TCONS_00015925	XLOC_005506	SDOW01000037.1	1657106	1659283	+	1224	0.491013	0.0349418	u	3
706	TCONS_00015948	XLOC_005515	SDOW01000037.1	2581255	2581746	+	301	0.38206	-0.0434783	u	2
707	TCONS_00015971	XLOC_005525	SDOW01000037.1	3378679	3384087	+	541	0.512015	-0.032491	o	2
708	TCONS_00016113	XLOC_005572	SDOW01000037.1	995603	1006027	-	336	0.625	0.190476	u	2
709	TCONS_00016233	XLOC_005621	SDOW01000037.1	5558658	5567152	-	1646	0.575334	0.062302	o	6
710	TCONS_00016256	XLOC_005629	SDOW01000037.1	2285040	2285425	.	385	0.620779	-0.171548	u	1
711	TCONS_00016257	XLOC_005630	SDOW01000037.1	4377594	4378291	.	697	0.467719	-0.0674847	u	1
712	TCONS_00016258	XLOC_005631	SDOW01000037.1	4380227	4380784	.	557	0.418312	-0.124464	u	1
713	TCONS_00016259	XLOC_005632	SDOW01000037.1	4382210	4382654	.	444	0.43018	0.0157068	u	1
714	TCONS_00016261	XLOC_005634	SDOW01000037.1	4388585	4389218	.	633	0.451817	0.125874	u	1
715	TCONS_00016265	XLOC_005638	SDOW01000038.1	31448	37235	+	1271	0.421715	0.108209	u	3
716	TCONS_00016266	XLOC_005638	SDOW01000038.1	31448	37235	+	843	0.469751	0.106061	u	2
717	TCONS_00016305	XLOC_005650	SDOW01000038.1	710183	716902	+	347	0.389049	0.22963	x	4
718	TCONS_00016312	XLOC_005655	SDOW01000038.1	1473429	1474573	+	617	0.431118	0.12782	u	3
719	TCONS_00016321	XLOC_005659	SDOW01000038.1	2454885	2462851	+	916	0.462882	-0.0990566	j	6
720	TCONS_00016347	XLOC_005665	SDOW01000038.1	2728598	2735916	+	691	0.551375	0.259843	x	3
721	TCONS_00016415	XLOC_005680	SDOW01000038.1	4741782	4742552	+	289	0.525952	0.0394737	u	3
722	TCONS_00016422	XLOC_005685	SDOW01000038.1	5247450	5248353	+	767	0.598435	0.0283224	u	2
723	TCONS_00016426	XLOC_005687	SDOW01000038.1	5359256	5364082	+	4645	0.451884	0.0242973	u	2
724	TCONS_00016445	XLOC_005692	SDOW01000038.1	5670183	5677532	+	512	0.589844	-0.0993378	u	5
725	TCONS_00016447	XLOC_005692	SDOW01000038.1	5670183	5677532	+	541	0.589649	-0.0783699	u	6
726	TCONS_00016448	XLOC_005692	SDOW01000038.1	5670183	5677532	+	500	0.584	-0.0342466	u	7
727	TCONS_00016451	XLOC_005693	SDOW01000038.1	5681856	5684555	+	347	0.559078	-0.113402	u	4
728	TCONS_00016452	XLOC_005693	SDOW01000038.1	5681856	5684555	+	355	0.583099	-0.101449	u	4
729	TCONS_00016455	XLOC_005695	SDOW01000038.1	5713545	5715106	+	562	0.567616	-0.115987	u	3
730	TCONS_00016491	XLOC_005708	SDOW01000038.1	6881034	6883770	+	953	0.398741	0.0105263	u	2
731	TCONS_00016492	XLOC_005708	SDOW01000038.1	6881034	6883770	+	627	0.398724	0.056	u	3
732	TCONS_00016493	XLOC_005708	SDOW01000038.1	6881034	6883770	+	1407	0.36887	0.0828516	u	1
733	TCONS_00016494	XLOC_005708	SDOW01000038.1	6881034	6883770	+	842	0.389549	0.0365854	u	2
734	TCONS_00016548	XLOC_005726	SDOW01000038.1	581873	585841	-	635	0.470866	-0.157191	u	4
735	TCONS_00016549	XLOC_005726	SDOW01000038.1	581873	585841	-	1523	0.428759	-0.0781011	u	4
736	TCONS_00016552	XLOC_005726	SDOW01000038.1	581873	585841	-	1303	0.427475	-0.00897666	u	2
737	TCONS_00016553	XLOC_005726	SDOW01000038.1	581873	585841	-	1102	0.427405	0.0233546	u	3
738	TCONS_00016554	XLOC_005726	SDOW01000038.1	581873	585841	-	1135	0.429075	0.00616016	u	3
739	TCONS_00016643	XLOC_005756	SDOW01000038.1	4593199	4594915	-	481	0.390852	0.117021	u	2
740	TCONS_00016752	XLOC_005766	SDOW01000038.1	5359256	5364082	-	1151	0.421373	-0.0103093	u	3
741	TCONS_00016754	XLOC_005766	SDOW01000038.1	5359256	5364082	-	1320	0.475	0.0015949	u	3
742	TCONS_00016755	XLOC_005766	SDOW01000038.1	5359256	5364082	-	1033	0.456922	0.00847458	u	4
743	TCONS_00016756	XLOC_005766	SDOW01000038.1	5359256	5364082	-	4732	0.451817	-0.0252572	u	2
744	TCONS_00016852	XLOC_005800	SDOW01000038.1	8785243	8791803	-	6245	0.405284	-0.0304228	j	4
745	TCONS_00016856	XLOC_005803	SDOW01000038.1	2454885	2462851	.	403	0.416873	-0.0119048	u	1
746	TCONS_00016857	XLOC_005804	SDOW01000038.1	2728598	2735916	.	1096	0.243613	0.191011	u	1
747	TCONS_00016858	XLOC_005805	SDOW01000038.1	3654115	3654603	.	488	0.415984	0.0246305	u	1
748	TCONS_00016859	XLOC_005806	SDOW01000038.1	4334764	4335400	.	636	0.573899	-0.079452	u	1
749	TCONS_00016861	XLOC_005808	SDOW01000038.1	8748265	8748694	.	429	0.641026	0.0763636	u	1
750	TCONS_00016862	XLOC_005809	SDOW01000038.1	8748746	8750191	.	1445	0.514187	0.0632571	u	1
751	TCONS_00016874	XLOC_005812	SDOW01000039.1	346071	348589	+	1204	0.509967	-0.019544	j	3
752	TCONS_00016932	XLOC_005833	SDOW01000039.1	4558158	4565517	+	5830	0.432075	-0.0186582	u	6
753	TCONS_00016933	XLOC_005833	SDOW01000039.1	4558158	4565517	+	5534	0.435851	-0.0215589	u	7
754	TCONS_00016934	XLOC_005833	SDOW01000039.1	4558158	4565517	+	4593	0.447638	-0.0262646	u	7
755	TCONS_00016935	XLOC_005833	SDOW01000039.1	4558158	4565517	+	5155	0.420951	-0.0184332	u	5
756	TCONS_00016938	XLOC_005833	SDOW01000039.1	4558158	4565517	+	5866	0.429083	-0.00516488	u	4
757	TCONS_00016939	XLOC_005833	SDOW01000039.1	4558158	4565517	+	4559	0.444615	-0.0192403	u	6
758	TCONS_00016940	XLOC_005833	SDOW01000039.1	4558158	4565517	+	1369	0.454346	0.138264	u	1
759	TCONS_00016944	XLOC_005837	SDOW01000039.1	5412989	5419869	+	1968	0.441057	0.0460829	x	2
760	TCONS_00016947	XLOC_005837	SDOW01000039.1	5412989	5419869	+	3823	0.417735	0.0131497	u	2
761	TCONS_00017025	XLOC_005869	SDOW01000039.1	4132165	4133844	-	686	0.514577	-0.155807	u	2
762	TCONS_00017030	XLOC_005872	SDOW01000039.1	4798148	4800357	-	2112	0.476799	-0.122145	u	2
763	TCONS_00017039	XLOC_005878	SDOW01000039.1	5279676	5282090	-	999	0.572573	-0.0034965	o	2
764	TCONS_00017062	XLOC_005888	SDOW01000039.1	2644962	2645871	.	909	0.555556	0.00990099	u	1
765	TCONS_00017063	XLOC_005889	SDOW01000039.1	4801691	4801971	.	280	0.610714	-0.333333	u	1
766	TCONS_00017064	XLOC_005890	SDOW01000039.1	5421694	5422774	.	1080	0.412037	0.0202247	u	1
767	TCONS_00017066	XLOC_005892	SDOW01000039.1	6152532	6153011	.	479	0.450939	0	u	1
768	TCONS_00017283	XLOC_005976	SDOW01000040.1	3978003	3982705	+	1164	0.492268	0.0366492	j	3
769	TCONS_00017353	XLOC_006004	SDOW01000040.1	5139555	5140399	+	518	0.428571	0.0900901	u	2
770	TCONS_00017365	XLOC_006011	SDOW01000040.1	5777370	5780506	+	672	0.526786	0.0734463	u	5
771	TCONS_00017366	XLOC_006012	SDOW01000040.1	5824463	5825830	+	469	0.701493	-0.00911854	u	5
772	TCONS_00017371	XLOC_006014	SDOW01000040.1	5921396	5924910	+	2065	0.497337	-0.0146056	j	4
773	TCONS_00017372	XLOC_006014	SDOW01000040.1	5921396	5924910	+	2278	0.488586	0.00449236	j	5
774	TCONS_00017374	XLOC_006014	SDOW01000040.1	5921396	5924910	+	3406	0.48943	-0.0221956	j	2
775	TCONS_00017441	XLOC_006027	SDOW01000040.1	6318750	6341678	+	786	0.455471	-0.0726257	x	2
776	TCONS_00017478	XLOC_006035	SDOW01000040.1	6718039	6726736	+	3759	0.44879	0.0491998	j	11
777	TCONS_00017506	XLOC_006035	SDOW01000040.1	6718039	6726736	+	4884	0.433251	0.0510397	j	9
778	TCONS_00017679	XLOC_006086	SDOW01000040.1	2512434	2515608	-	786	0.449109	-0.155807	o	2
779	TCONS_00017750	XLOC_006106	SDOW01000040.1	4014410	4018788	-	4213	0.435319	0.00763359	j	3
780	TCONS_00017753	XLOC_006107	SDOW01000040.1	4227581	4232826	-	903	0.479513	0.0531178	o	4
781	TCONS_00017767	XLOC_006111	SDOW01000040.1	4366413	4368477	-	1350	0.359259	-0.0185567	u	4
782	TCONS_00017768	XLOC_006111	SDOW01000040.1	4366413	4368477	-	1435	0.363763	-0.00383142	u	4
783	TCONS_00017769	XLOC_006111	SDOW01000040.1	4366413	4368477	-	1439	0.364142	0	u	4
784	TCONS_00017770	XLOC_006111	SDOW01000040.1	4366413	4368477	-	1767	0.362762	0.0296412	u	2
785	TCONS_00017771	XLOC_006112	SDOW01000040.1	4373737	4375705	-	387	0.713178	-0.130435	o	2
786	TCONS_00017807	XLOC_006126	SDOW01000040.1	5180583	5181055	-	386	0.533679	0.0679612	o	2
787	TCONS_00017848	XLOC_006145	SDOW01000040.1	6069837	6086422	-	324	0.444444	-0.111111	x	3
788	TCONS_00017849	XLOC_006145	SDOW01000040.1	6069837	6086422	-	414	0.466184	0.0259067	x	4
789	TCONS_00017943	XLOC_006179	SDOW01000040.1	2077876	2078280	.	404	0.74505	0.00996678	u	1
790	TCONS_00017944	XLOC_006180	SDOW01000040.1	2381154	2381886	.	732	0.539617	-0.103797	u	1
791	TCONS_00017945	XLOC_006181	SDOW01000040.1	2490002	2490456	.	454	0.493392	0.258929	u	1
792	TCONS_00017946	XLOC_006182	SDOW01000040.1	2863123	2863773	.	650	0.606154	-0.0913706	u	1
793	TCONS_00017947	XLOC_006183	SDOW01000040.1	4047510	4048467	.	957	0.419018	-0.187032	u	1
794	TCONS_00017948	XLOC_006184	SDOW01000040.1	4355126	4355533	.	407	0.405405	0.0666667	u	1
795	TCONS_00017949	XLOC_006185	SDOW01000040.1	5729782	5730320	.	538	0.548327	0.0711864	u	1
796	TCONS_00017950	XLOC_006186	SDOW01000040.1	6231826	6232027	.	201	0.373134	0.0933333	u	1
797	TCONS_00017951	XLOC_006187	SDOW01000040.1	6395798	6396320	.	522	0.496169	-0.104247	u	1
798	TCONS_00017953	XLOC_006189	SDOW01000040.1	6583874	6584678	.	804	0.363184	-0.0821918	u	1
799	TCONS_00017954	XLOC_006190	SDOW01000041.1	28347	35414	+	1209	0.514475	-0.102894	x	3
800	TCONS_00017994	XLOC_006204	SDOW01000041.1	1525703	1527876	+	539	0.502783	0.0553506	u	2
801	TCONS_00018071	XLOC_006242	SDOW01000041.1	274265	277860	-	942	0.666667	-0.152866	u	2
802	TCONS_00018073	XLOC_006244	SDOW01000041.1	628227	633432	-	798	0.45614	0.032967	x	3
803	TCONS_00018074	XLOC_006244	SDOW01000041.1	628227	633432	-	1023	0.504399	-0.0542636	x	3
804	TCONS_00018075	XLOC_006244	SDOW01000041.1	628227	633432	-	407	0.584767	-0.142857	u	3
805	TCONS_00018080	XLOC_006249	SDOW01000041.1	1027236	1032358	-	737	0.449118	0.00302115	u	3
806	TCONS_00018165	XLOC_006280	SDOW01000041.1	4095955	4101878	-	1217	0.573541	0.00859599	u	2
807	TCONS_00018167	XLOC_006280	SDOW01000041.1	4095955	4101878	-	1194	0.488275	-0.0360206	u	2
808	TCONS_00018256	XLOC_006304	SDOW01000041.1	2395403	2396104	.	701	0.720399	-0.251485	u	1
809	TCONS_00018258	XLOC_006306	SDOW01000041.1	6637496	6638247	.	751	0.520639	-0.0332481	u	1
810	TCONS_00018276	XLOC_006314	SDOW01000042.1	2131083	2136510	+	776	0.469072	-0.164835	u	1
811	TCONS_00018277	XLOC_006314	SDOW01000042.1	2131083	2136510	+	1333	0.546137	0.0906593	u	2
812	TCONS_00018278	XLOC_006314	SDOW01000042.1	2131083	2136510	+	1565	0.582109	0.0933041	u	1
813	TCONS_00018281	XLOC_006317	SDOW01000042.1	2903731	2906714	+	1327	0.401658	-0.00938086	u	4
814	TCONS_00018282	XLOC_006317	SDOW01000042.1	2903731	2906714	+	889	0.413948	-0.0108696	u	5
815	TCONS_00018283	XLOC_006317	SDOW01000042.1	2903731	2906714	+	1540	0.371429	0.013986	u	3
816	TCONS_00018359	XLOC_006347	SDOW01000042.1	5502073	5503965	+	565	0.465487	-0.0646388	u	2
817	TCONS_00018366	XLOC_006350	SDOW01000042.1	5712921	5714466	+	946	0.44186	-0.0669856	j	4
818	TCONS_00018367	XLOC_006350	SDOW01000042.1	5712921	5714466	+	936	0.441239	-0.0702179	j	4
819	TCONS_00018368	XLOC_006350	SDOW01000042.1	5712921	5714466	+	1352	0.443787	-0.0433333	j	3
820	TCONS_00018369	XLOC_006350	SDOW01000042.1	5712921	5714466	+	1342	0.443368	-0.0453782	j	3
821	TCONS_00018370	XLOC_006350	SDOW01000042.1	5712921	5714466	+	1207	0.444905	-0.0391061	j	3
822	TCONS_00018371	XLOC_006350	SDOW01000042.1	5712921	5714466	+	942	0.441614	-0.0673077	j	4
823	TCONS_00018425	XLOC_006370	SDOW01000042.1	2131083	2136510	-	868	0.528802	-0.106754	u	3
824	TCONS_00018426	XLOC_006370	SDOW01000042.1	2131083	2136510	-	794	0.526448	-0.138756	u	3
825	TCONS_00018428	XLOC_006370	SDOW01000042.1	2131083	2136510	-	757	0.393659	-0.0402685	u	1
826	TCONS_00018429	XLOC_006370	SDOW01000042.1	2131083	2136510	-	885	0.542373	-0.0583333	u	2
827	TCONS_00018430	XLOC_006370	SDOW01000042.1	2131083	2136510	-	716	0.653631	-0.115385	u	2
828	TCONS_00018434	XLOC_006373	SDOW01000042.1	2748107	2749768	-	326	0.601227	0.112245	u	2
829	TCONS_00018435	XLOC_006373	SDOW01000042.1	2748107	2749768	-	1067	0.511715	0.014652	u	1
830	TCONS_00018437	XLOC_006374	SDOW01000042.1	2896343	2898651	-	1381	0.452571	-0.0208	j	3
831	TCONS_00018460	XLOC_006377	SDOW01000042.1	3393539	3396052	-	646	0.504644	0.165644	u	2
832	TCONS_00018553	XLOC_006416	SDOW01000042.1	192413	192893	.	480	0.61875	-0.010101	u	1
833	TCONS_00018556	XLOC_006419	SDOW01000042.1	1713086	1713354	.	268	0.514925	-0.188406	u	1
834	TCONS_00018557	XLOC_006420	SDOW01000042.1	2448766	2449211	.	445	0.710112	0.0253165	u	1
835	TCONS_00018558	XLOC_006421	SDOW01000042.1	2748107	2749768	.	473	0.372093	-0.340909	u	1
836	TCONS_00018559	XLOC_006422	SDOW01000042.1	2812426	2812956	.	530	0.386792	0.0439024	u	1
837	TCONS_00018560	XLOC_006423	SDOW01000042.1	2903731	2906714	.	1035	0.402899	-0.0119904	u	1
838	TCONS_00018561	XLOC_006424	SDOW01000042.1	3590653	3591156	.	503	0.524851	0	u	1
839	TCONS_00018562	XLOC_006425	SDOW01000042.1	6964566	6964876	.	310	0.4	-0.419355	u	1
840	TCONS_00018563	XLOC_006426	SDOW01000042.1	6970156	6970435	.	279	0.641577	-0.0949721	u	1
841	TCONS_00018590	XLOC_006436	SDOW01000043.1	874070	880088	+	459	0.457516	0.0190476	x	2
842	TCONS_00018635	XLOC_006454	SDOW01000043.1	2704646	2705433	+	663	0.411765	-0.0549451	u	2
843	TCONS_00018698	XLOC_006479	SDOW01000043.1	5298830	5302256	+	1345	0.484758	0.0828221	j	2
844	TCONS_00018886	XLOC_006541	SDOW01000043.1	1888267	1892941	-	1429	0.487754	-0.0903874	o	4
845	TCONS_00018889	XLOC_006541	SDOW01000043.1	1888267	1892941	-	1072	0.405784	0.0666667	u	1
846	TCONS_00018998	XLOC_006581	SDOW01000043.1	6286359	6288285	-	396	0.530303	-0.0380952	u	2
847	TCONS_00019003	XLOC_006584	SDOW01000043.1	6803566	6806075	-	1234	0.461102	0.0509666	u	5
848	TCONS_00019004	XLOC_006584	SDOW01000043.1	6803566	6806075	-	1316	0.477204	-0.00318471	u	4
849	TCONS_00019005	XLOC_006584	SDOW01000043.1	6803566	6806075	-	1333	0.474869	0.00157978	u	4
850	TCONS_00019006	XLOC_006584	SDOW01000043.1	6803566	6806075	-	2176	0.426011	-0.0248112	u	3
851	TCONS_00019008	XLOC_006584	SDOW01000043.1	6803566	6806075	-	1497	0.456914	0.00877193	u	4
852	TCONS_00019009	XLOC_006584	SDOW01000043.1	6803566	6806075	-	1913	0.424464	0	u	4
853	TCONS_00019010	XLOC_006584	SDOW01000043.1	6803566	6806075	-	888	0.47973	0.00938967	u	4
854	TCONS_00019011	XLOC_006584	SDOW01000043.1	6803566	6806075	-	1272	0.459906	0.042735	u	5
855	TCONS_00019012	XLOC_006584	SDOW01000043.1	6803566	6806075	-	1070	0.484112	0.046332	u	5
856	TCONS_00019032	XLOC_006593	SDOW01000043.1	7387388	7392596	-	4674	0.409927	0.00835073	u	2
857	TCONS_00019048	XLOC_006602	SDOW01000043.1	7874842	7876052	-	409	0.413203	0.136095	u	2
858	TCONS_00019084	XLOC_006619	SDOW01000043.1	8308114	8317912	-	1343	0.4758	0.0766823	u	1
859	TCONS_00019088	XLOC_006619	SDOW01000043.1	8308114	8317912	-	640	0.320312	0.00487805	u	1
860	TCONS_00019095	XLOC_006623	SDOW01000043.1	2667557	2667926	.	369	0.731707	-0.118519	u	1
861	TCONS_00019096	XLOC_006624	SDOW01000043.1	6273336	6276136	.	2800	0.412143	-0.0034662	u	1
862	TCONS_00019097	XLOC_006625	SDOW01000043.1	6276405	6277567	.	1162	0.431153	-0.0459082	u	1
863	TCONS_00019098	XLOC_006626	SDOW01000043.1	7368407	7368765	.	358	0.645251	-0.0476191	u	1
864	TCONS_00019099	XLOC_006627	SDOW01000043.1	7799448	7800219	.	771	0.542153	0.0669856	u	1
865	TCONS_00019218	XLOC_006676	SDOW01000044.1	8857929	8862756	+	2943	0.429494	0	j	3
866	TCONS_00019221	XLOC_006676	SDOW01000044.1	8857929	8862756	+	1392	0.47342	0.00151745	j	3
867	TCONS_00019297	XLOC_006708	SDOW01000044.1	1225643	1230200	-	555	0.515315	-0.041958	u	3
868	TCONS_00019298	XLOC_006708	SDOW01000044.1	1225643	1230200	-	565	0.515044	-0.0446735	u	3
869	TCONS_00019321	XLOC_006718	SDOW01000044.1	3176701	3180949	-	1580	0.431013	0.0337739	u	5
870	TCONS_00019322	XLOC_006718	SDOW01000044.1	3176701	3180949	-	2108	0.420304	0.0293454	u	4
871	TCONS_00019323	XLOC_006718	SDOW01000044.1	3176701	3180949	-	2173	0.419236	0.0340285	u	4
872	TCONS_00019337	XLOC_006723	SDOW01000044.1	3573379	3576145	-	2427	0.466007	0.071618	j	4
873	TCONS_00019463	XLOC_006770	SDOW01000044.1	11660751	11662382	-	492	0.449187	0.0588235	u	5
874	TCONS_00019499	XLOC_006776	SDOW01000044.1	12657188	12665578	-	2752	0.477108	-0.0190404	u	5
875	TCONS_00019501	XLOC_006776	SDOW01000044.1	12657188	12665578	-	3331	0.458121	-0.0131062	u	5
876	TCONS_00019508	XLOC_006776	SDOW01000044.1	12657188	12665578	-	7035	0.422033	0.0185248	u	4
877	TCONS_00019512	XLOC_006776	SDOW01000044.1	12657188	12665578	-	5209	0.427913	0.008524	u	4
878	TCONS_00019514	XLOC_006776	SDOW01000044.1	12657188	12665578	-	2488	0.493167	-0.0187449	u	7
879	TCONS_00019515	XLOC_006776	SDOW01000044.1	12657188	12665578	-	6085	0.42991	0.0191131	u	5
880	TCONS_00019520	XLOC_006779	SDOW01000044.1	12923789	12930308	-	1519	0.458196	0.0488506	o	2
881	TCONS_00019523	XLOC_006779	SDOW01000044.1	12923789	12930308	-	2056	0.43677	0.0267261	o	2
882	TCONS_00019526	XLOC_006779	SDOW01000044.1	12923789	12930308	-	927	0.490831	0.010989	u	2
883	TCONS_00019527	XLOC_006779	SDOW01000044.1	12923789	12930308	-	854	0.48829	0.0263789	u	2
884	TCONS_00019528	XLOC_006779	SDOW01000044.1	12923789	12930308	-	1447	0.470629	0.0895742	u	2
885	TCONS_00019529	XLOC_006779	SDOW01000044.1	12923789	12930308	-	1860	0.446774	0.0902527	u	1
886	TCONS_00019565	XLOC_006789	SDOW01000044.1	13549798	13553351	-	1068	0.451311	0.0954357	j	3
887	TCONS_00019570	XLOC_006789	SDOW01000044.1	13549798	13553351	-	1254	0.486443	0.0590164	j	3
888	TCONS_00019591	XLOC_006796	SDOW01000044.1	1207246	1208407	.	1161	0.569337	0.107413	u	1
889	TCONS_00019592	XLOC_006797	SDOW01000044.1	1208499	1209164	.	665	0.550376	0.120219	u	1
890	TCONS_00019593	XLOC_006798	SDOW01000044.1	1469064	1469634	.	570	0.624561	0.207865	u	1
891	TCONS_00019594	XLOC_006799	SDOW01000044.1	1965984	1966383	.	399	0.566416	-0.292035	u	1
892	TCONS_00019595	XLOC_006800	SDOW01000044.1	1969129	1969445	.	316	0.53481	0.147929	u	1
893	TCONS_00019596	XLOC_006801	SDOW01000044.1	1970216	1970517	.	301	0.44186	0.157895	u	1
894	TCONS_00019600	XLOC_006805	SDOW01000044.1	2746070	2746703	.	633	0.665087	0.273159	u	1
895	TCONS_00019602	XLOC_006807	SDOW01000044.1	4025527	4029832	.	204	0.411765	-0.0714286	u	1
896	TCONS_00019604	XLOC_006809	SDOW01000044.1	7180154	7181655	.	1501	0.411059	-0.105348	u	1
897	TCONS_00019605	XLOC_006810	SDOW01000044.1	7449240	7449455	.	215	0.283721	-0.0491803	u	1
898	TCONS_00019606	XLOC_006811	SDOW01000044.1	8387206	8387492	.	286	0.451049	-0.0697674	u	1
899	TCONS_00019607	XLOC_006812	SDOW01000044.1	8585352	8585929	.	577	0.688042	0.209068	u	1
900	TCONS_00019608	XLOC_006813	SDOW01000044.1	11154017	11154313	.	296	0.543919	-0.180124	u	1
901	TCONS_00019609	XLOC_006814	SDOW01000044.1	13371852	13372469	.	617	0.536467	0.081571	u	1
902	TCONS_00019691	XLOC_006839	SDOW01000045.1	2446121	2446525	+	208	0.514423	0.233645	u	2
903	TCONS_00019704	XLOC_006846	SDOW01000045.1	2800076	2802122	+	895	0.480447	-0.153488	u	2
904	TCONS_00019705	XLOC_006846	SDOW01000045.1	2800076	2802122	+	795	0.480503	-0.13089	u	2
905	TCONS_00019723	XLOC_006851	SDOW01000045.1	3804612	3807666	+	1167	0.54413	-0.143307	j	2
906	TCONS_00019726	XLOC_006852	SDOW01000045.1	4036115	4037229	+	1114	0.493716	0.08	u	1
907	TCONS_00019762	XLOC_006863	SDOW01000045.1	6289671	6291099	+	949	0.571128	-0.0885609	o	2
908	TCONS_00019763	XLOC_006863	SDOW01000045.1	6289671	6291099	+	1051	0.531874	-0.0339893	o	2
909	TCONS_00019790	XLOC_006874	SDOW01000045.1	7804362	7809705	+	2914	0.45779	0.0269865	j	3
910	TCONS_00019797	XLOC_006874	SDOW01000045.1	7804362	7809705	+	3761	0.417708	0.0210057	j	3
911	TCONS_00019798	XLOC_006874	SDOW01000045.1	7804362	7809705	+	2269	0.477303	0.0655586	j	4
912	TCONS_00019799	XLOC_006874	SDOW01000045.1	7804362	7809705	+	3249	0.44229	0.0173974	j	4
913	TCONS_00019870	XLOC_006896	SDOW01000045.1	1015096	1018442	-	841	0.426873	0.097493	u	6
914	TCONS_00019935	XLOC_006920	SDOW01000045.1	7024820	7027818	-	859	0.506403	0.103448	x	3
915	TCONS_00020008	XLOC_006944	SDOW01000045.1	9895390	9896947	-	587	0.586031	0.27907	u	2
916	TCONS_00020015	XLOC_006948	SDOW01000045.1	1154433	1155224	.	791	0.51201	0.0716049	u	1
917	TCONS_00020016	XLOC_006949	SDOW01000045.1	1429377	1429899	.	522	0.51341	0.00746269	u	1
918	TCONS_00020018	XLOC_006951	SDOW01000045.1	1742064	1745048	.	2984	0.506702	0.00925926	u	1
919	TCONS_00020019	XLOC_006952	SDOW01000045.1	1937636	1938007	.	371	0.501348	-0.150538	u	1
920	TCONS_00020020	XLOC_006953	SDOW01000045.1	2802270	2802639	.	369	0.395664	-0.0821918	u	1
921	TCONS_00020025	XLOC_006958	SDOW01000045.1	5969039	5971021	.	1982	0.441978	0.00456621	u	1
922	TCONS_00020051	XLOC_006968	SDOW01000046.1	1271588	1288140	+	811	0.503083	-0.0490196	x	5
923	TCONS_00020052	XLOC_006968	SDOW01000046.1	1271588	1288140	+	602	0.504983	-0.0263158	x	4
924	TCONS_00020244	XLOC_007021	SDOW01000046.1	5091589	5099373	+	2278	0.486831	-0.0261497	x	4
925	TCONS_00020245	XLOC_007021	SDOW01000046.1	5091589	5099373	+	2258	0.485828	-0.01732	x	4
926	TCONS_00020248	XLOC_007021	SDOW01000046.1	5091589	5099373	+	1405	0.52669	0.0216216	x	5
927	TCONS_00020272	XLOC_007031	SDOW01000046.1	5360807	5370273	+	1492	0.491287	-0.0613915	o	6
928	TCONS_00020390	XLOC_007069	SDOW01000046.1	3792121	3797662	-	528	0.498106	-0.171103	u	1
929	TCONS_00020395	XLOC_007072	SDOW01000046.1	3840393	3845481	-	1125	0.400889	-0.0110865	u	2
930	TCONS_00020432	XLOC_007076	SDOW01000046.1	3896467	3900908	-	4152	0.410886	0.0117233	j	4
931	TCONS_00020514	XLOC_007107	SDOW01000046.1	5389068	5389400	.	332	0.463855	-0.12987	u	1
932	TCONS_00020515	XLOC_007108	SDOW01000046.1	5405719	5406532	.	813	0.450185	0.0983607	u	1
933	TCONS_00020523	XLOC_007112	SDOW01000047.1	202507	215079	+	751	0.575233	0.0833333	j	3
934	TCONS_00020665	XLOC_007171	SDOW01000047.1	8367477	8368343	+	782	0.512788	0.032419	u	2
935	TCONS_00020697	XLOC_007182	SDOW01000047.1	9464411	9466112	+	683	0.434846	0.030303	u	2
936	TCONS_00020698	XLOC_007182	SDOW01000047.1	9464411	9466112	+	764	0.407068	-0.0803858	u	1
937	TCONS_00020745	XLOC_007197	SDOW01000047.1	1192576	1193135	-	293	0.412969	0.107438	u	2
938	TCONS_00020797	XLOC_007221	SDOW01000047.1	3557544	3560327	-	771	0.522698	-0.111663	u	2
939	TCONS_00020798	XLOC_007221	SDOW01000047.1	3557544	3560327	-	897	0.532887	-0.117155	u	2
940	TCONS_00020800	XLOC_007221	SDOW01000047.1	3557544	3560327	-	979	0.54239	-0.126177	u	2
941	TCONS_00020801	XLOC_007221	SDOW01000047.1	3557544	3560327	-	2783	0.466044	0.0146492	u	1
942	TCONS_00020845	XLOC_007234	SDOW01000047.1	6270370	6271116	-	662	0.691843	-0.200873	u	2
943	TCONS_00020872	XLOC_007244	SDOW01000047.1	8026917	8042663	-	2393	0.413707	0.00808081	o	1
944	TCONS_00020931	XLOC_007266	SDOW01000047.1	6979089	6979863	.	774	0.591731	-0.117904	u	1
945	TCONS_00020932	XLOC_007267	SDOW01000047.1	7287996	7288406	.	410	0.429268	-0.193182	u	1
946	TCONS_00020934	XLOC_007269	SDOW01000047.1	8368661	8369035	.	374	0.395722	-0.0405405	u	1
947	TCONS_00020935	XLOC_007270	SDOW01000047.1	8370209	8370447	.	238	0.663866	0.0506329	u	1
948	TCONS_00020936	XLOC_007271	SDOW01000047.1	8370780	8371076	.	296	0.672297	0.155779	u	1
949	TCONS_00020938	XLOC_007273	SDOW01000047.1	9229009	9229668	.	659	0.6783	0.0425056	u	1
950	TCONS_00020939	XLOC_007274	SDOW01000047.1	9466768	9467068	.	300	0.433333	0.261538	u	1
951	TCONS_00020940	XLOC_007275	SDOW01000047.1	9519147	9519928	.	781	0.601793	0.0553191	u	1
952	TCONS_00020942	XLOC_007277	SDOW01000048.1	498949	500126	+	506	0.420949	0.0234742	u	2
953	TCONS_00021045	XLOC_007313	SDOW01000048.1	488402	489708	-	1193	0.406538	-0.16701	u	2
954	TCONS_00021046	XLOC_007314	SDOW01000048.1	498949	500126	-	1064	0.408835	-0.177011	u	2
955	TCONS_00021070	XLOC_007327	SDOW01000048.1	3007799	3012029	-	2253	0.367954	0.00844391	u	2
956	TCONS_00021071	XLOC_007327	SDOW01000048.1	3007799	3012029	-	3558	0.366779	0.0375479	u	2
957	TCONS_00021072	XLOC_007327	SDOW01000048.1	3007799	3012029	-	735	0.447619	0.0395137	u	3
958	TCONS_00021075	XLOC_007327	SDOW01000048.1	3007799	3012029	-	753	0.447543	0.0385757	u	3
959	TCONS_00021076	XLOC_007327	SDOW01000048.1	3007799	3012029	-	4230	0.360993	0.0242305	u	1
960	TCONS_00021183	XLOC_007356	SDOW01000048.1	161908	166078	.	4170	0.42494	0.00902935	u	1
961	TCONS_00021184	XLOC_007357	SDOW01000048.1	859730	859957	.	227	0.585903	-0.037594	u	1
962	TCONS_00021185	XLOC_007358	SDOW01000048.1	3235454	3236345	.	891	0.538721	-0.0541667	u	1
963	TCONS_00021271	XLOC_007397	SDOW01000049.1	5449134	5451657	+	2171	0.480424	-0.0412272	u	4
964	TCONS_00021272	XLOC_007397	SDOW01000049.1	5449134	5451657	+	1453	0.471438	0.0394161	u	5
965	TCONS_00021274	XLOC_007399	SDOW01000049.1	6000307	6001998	+	589	0.633277	0.206434	u	2
966	TCONS_00021364	XLOC_007433	SDOW01000049.1	11781021	11783110	+	2089	0.436094	0.00109769	u	1
967	TCONS_00021365	XLOC_007433	SDOW01000049.1	11781021	11783110	+	348	0.563218	-0.132653	u	2
968	TCONS_00021374	XLOC_007440	SDOW01000049.1	13645856	13647280	+	669	0.44843	0.226667	u	2
969	TCONS_00021540	XLOC_007498	SDOW01000049.1	8131665	8132676	-	919	0.531012	-0.0286885	u	2
970	TCONS_00021541	XLOC_007498	SDOW01000049.1	8131665	8132676	-	929	0.531755	-0.0202429	u	2
971	TCONS_00021631	XLOC_007524	SDOW01000049.1	13777322	13783177	-	512	0.541016	0.148014	x	4
972	TCONS_00021632	XLOC_007524	SDOW01000049.1	13777322	13783177	-	625	0.5056	0.0506329	x	3
973	TCONS_00021652	XLOC_007536	SDOW01000049.1	3213060	3213417	.	357	0.397759	-0.0140845	u	1
974	TCONS_00021653	XLOC_007537	SDOW01000049.1	3787039	3794417	.	856	0.46028	-0.106599	u	1
975	TCONS_00021654	XLOC_007538	SDOW01000049.1	4255094	4255370	.	276	0.666667	0.0652174	u	1
976	TCONS_00021655	XLOC_007539	SDOW01000049.1	4736337	4736629	.	292	0.541096	-0.341772	u	1
977	TCONS_00021656	XLOC_007540	SDOW01000049.1	5999884	6000202	.	318	0.556604	0.118644	u	1
978	TCONS_00021657	XLOC_007541	SDOW01000049.1	9365326	9366032	.	706	0.514164	-0.267218	u	1
979	TCONS_00021658	XLOC_007542	SDOW01000049.1	9390653	9391040	.	387	0.540052	-0.0717703	u	1
980	TCONS_00021677	XLOC_007550	SDOW01000050.1	743564	744632	+	718	0.483287	-0.0144092	u	3
981	TCONS_00021681	XLOC_007552	SDOW01000050.1	800007	802794	+	394	0.662437	-0.287356	u	2
982	TCONS_00021682	XLOC_007552	SDOW01000050.1	800007	802794	+	477	0.641509	-0.254902	u	2
983	TCONS_00021683	XLOC_007552	SDOW01000050.1	800007	802794	+	515	0.625243	-0.229814	u	2
984	TCONS_00021730	XLOC_007568	SDOW01000050.1	2285092	2291009	+	1047	0.462273	0.0826446	u	4
985	TCONS_00021776	XLOC_007577	SDOW01000050.1	3494255	3495418	+	590	0.540678	-0.247649	u	2
986	TCONS_00021782	XLOC_007581	SDOW01000050.1	3765801	3771045	+	770	0.533766	0.0316302	u	4
987	TCONS_00021802	XLOC_007587	SDOW01000050.1	4496861	4500763	+	434	0.502304	0.0642202	u	1
988	TCONS_00021805	XLOC_007588	SDOW01000050.1	4506011	4508475	+	933	0.439443	0.0341463	u	1
989	TCONS_00021854	XLOC_007606	SDOW01000050.1	7953963	7963624	+	449	0.654788	0.22449	u	2
990	TCONS_00021880	XLOC_007612	SDOW01000050.1	9089878	9096144	+	371	0.555256	-0.320388	u	2
991	TCONS_00021914	XLOC_007620	SDOW01000050.1	581528	585602	-	894	0.469799	-0.0571429	u	5
992	TCONS_00022009	XLOC_007654	SDOW01000050.1	4487945	4490536	-	950	0.685263	-0.155146	u	2
993	TCONS_00022010	XLOC_007654	SDOW01000050.1	4487945	4490536	-	841	0.618312	-0.230769	u	1
994	TCONS_00022076	XLOC_007668	SDOW01000050.1	6202318	6205523	-	1576	0.475888	0.08	o	2
995	TCONS_00022218	XLOC_007702	SDOW01000050.1	585698	585916	.	218	0.669725	0.0821918	u	1
996	TCONS_00022220	XLOC_007704	SDOW01000050.1	2292600	2292874	.	274	0.445255	0.0983607	u	1
997	TCONS_00022222	XLOC_007706	SDOW01000050.1	4778665	4779021	.	356	0.660112	0.225532	u	1
998	TCONS_00022223	XLOC_007707	SDOW01000050.1	9476885	9477610	.	725	0.627586	0.318681	u	1
999	TCONS_00022224	XLOC_007708	SDOW01000050.1	10169256	10169487	.	231	0.666667	-0.272727	u	1
1000	TCONS_00022265	XLOC_007725	SDOW01000051.1	601392	604265	+	1741	0.423894	-0.0352304	u	4
1001	TCONS_00022266	XLOC_007725	SDOW01000051.1	601392	604265	+	2653	0.385224	-0.037182	u	3
1002	TCONS_00022278	XLOC_007731	SDOW01000051.1	1686768	1691722	+	319	0.598746	-0.078534	o	2
1003	TCONS_00022296	XLOC_007738	SDOW01000051.1	2294079	2301649	+	516	0.536822	-0.0108303	u	2
1004	TCONS_00022394	XLOC_007769	SDOW01000051.1	610947	612006	-	967	0.549121	-0.171375	u	2
1005	TCONS_00022395	XLOC_007769	SDOW01000051.1	610947	612006	-	584	0.527397	-0.11039	u	2
1006	TCONS_00022402	XLOC_007773	SDOW01000051.1	1490446	1491018	-	301	0.594684	-0.318436	u	2
1007	TCONS_00022403	XLOC_007773	SDOW01000051.1	1490446	1491018	-	292	0.609589	-0.359551	u	2
1008	TCONS_00022404	XLOC_007773	SDOW01000051.1	1490446	1491018	-	292	0.609589	-0.359551	u	2
1009	TCONS_00022411	XLOC_007779	SDOW01000051.1	2672089	2673331	-	939	0.521832	-0.179592	u	2
1010	TCONS_00022479	XLOC_007802	SDOW01000051.1	5192276	5197659	-	564	0.572695	0.108359	o	2
1011	TCONS_00022484	XLOC_007804	SDOW01000051.1	179985	180311	.	326	0.346626	0.115044	u	1
1012	TCONS_00022485	XLOC_007805	SDOW01000051.1	1691861	1692141	.	280	0.417857	0.0598291	u	1
1013	TCONS_00022486	XLOC_007806	SDOW01000051.1	1709601	1709921	.	320	0.64375	0.213592	u	1
1014	TCONS_00022487	XLOC_007807	SDOW01000051.1	1711348	1712363	.	1015	0.413793	-0.0476191	u	1
1015	TCONS_00022488	XLOC_007808	SDOW01000051.1	1712998	1713428	.	430	0.576744	-0.0403226	u	1
1016	TCONS_00022489	XLOC_007809	SDOW01000051.1	1713555	1714065	.	510	0.558824	-0.0526316	u	1
1017	TCONS_00022490	XLOC_007810	SDOW01000051.1	1735881	1736278	.	397	0.423174	-0.142857	u	1
1018	TCONS_00022491	XLOC_007811	SDOW01000051.1	1736342	1736902	.	560	0.480357	-0.29368	u	1
1019	TCONS_00022492	XLOC_007812	SDOW01000051.1	1737394	1738045	.	651	0.551459	0.0584958	u	1
1020	TCONS_00022493	XLOC_007813	SDOW01000051.1	2302297	2302844	.	547	0.391225	0.140187	u	1
1021	TCONS_00022494	XLOC_007814	SDOW01000051.1	5622448	5622704	.	256	0.4375	0.0357143	u	1
1022	TCONS_00022520	XLOC_007824	SDOW01000052.1	2205549	2208989	+	201	0.472637	-0.0105263	u	3
1023	TCONS_00022552	XLOC_007832	SDOW01000052.1	3916982	3920091	+	495	0.488889	0.115702	j	2
1024	TCONS_00022573	XLOC_007839	SDOW01000052.1	5242492	5246764	+	2215	0.467269	0.0531401	j	6
1025	TCONS_00022610	XLOC_007854	SDOW01000052.1	2717126	2717968	-	751	0.525965	-0.0835443	o	2
1026	TCONS_00022651	XLOC_007870	SDOW01000052.1	529693	530263	.	570	0.498246	0.0140845	u	1
1027	TCONS_00022652	XLOC_007871	SDOW01000052.1	3017584	3017915	.	331	0.734139	0.037037	u	1
1028	TCONS_00022904	XLOC_007984	SDOW01000053.1	6736803	6741094	+	1219	0.565217	-0.030479	o	2
1029	TCONS_00022976	XLOC_008013	SDOW01000053.1	8102228	8108790	+	978	0.476483	-0.137339	u	3
1030	TCONS_00022977	XLOC_008013	SDOW01000053.1	8102228	8108790	+	1713	0.516054	0.0226244	u	9
1031	TCONS_00022981	XLOC_008013	SDOW01000053.1	8102228	8108790	+	2170	0.430415	0.137045	u	6
1032	TCONS_00022982	XLOC_008013	SDOW01000053.1	8102228	8108790	+	1994	0.436309	0.156322	u	6
1033	TCONS_00022983	XLOC_008013	SDOW01000053.1	8102228	8108790	+	2324	0.428141	0.139698	u	7
1034	TCONS_00022984	XLOC_008013	SDOW01000053.1	8102228	8108790	+	2071	0.44423	0.143478	u	6
1035	TCONS_00022985	XLOC_008013	SDOW01000053.1	8102228	8108790	+	1238	0.357027	0.0723982	u	3
1036	TCONS_00022986	XLOC_008013	SDOW01000053.1	8102228	8108790	+	949	0.374078	0.0816901	u	2
1037	TCONS_00023043	XLOC_008034	SDOW01000053.1	885225	891958	-	1185	0.481857	0.0297723	j	6
1038	TCONS_00023069	XLOC_008035	SDOW01000053.1	969719	970504	-	696	0.53592	0.0348525	u	2
1039	TCONS_00023070	XLOC_008036	SDOW01000053.1	985047	986280	-	1138	0.511424	-0.0343643	u	2
1040	TCONS_00023079	XLOC_008041	SDOW01000053.1	1851095	1855775	-	1069	0.460243	0.0325203	u	2
1041	TCONS_00023080	XLOC_008041	SDOW01000053.1	1851095	1855775	-	288	0.65625	-0.0476191	u	2
1042	TCONS_00023174	XLOC_008063	SDOW01000053.1	3755803	3757060	-	915	0.39235	0.08078	u	3
1043	TCONS_00023373	XLOC_008112	SDOW01000053.1	6736803	6741094	-	595	0.643697	-0.0130548	x	2
1044	TCONS_00023428	XLOC_008134	SDOW01000053.1	404282	404793	.	511	0.436399	0.0313901	u	1
1045	TCONS_00023431	XLOC_008137	SDOW01000053.1	901275	901938	.	663	0.630468	-0.0287081	u	1
1046	TCONS_00023433	XLOC_008139	SDOW01000053.1	2973701	2973990	.	289	0.366782	0.0188679	u	1
1047	TCONS_00023435	XLOC_008141	SDOW01000053.1	3758288	3758515	.	227	0.788546	0.0167598	u	1
1048	TCONS_00023436	XLOC_008142	SDOW01000053.1	4052008	4053141	.	1133	0.622242	-0.219858	u	1
1049	TCONS_00023437	XLOC_008143	SDOW01000053.1	6050709	6058081	.	284	0.5	0.126761	u	1
1050	TCONS_00023438	XLOC_008144	SDOW01000053.1	6485743	6486104	.	361	0.518006	-0.122995	u	1
1051	TCONS_00023457	XLOC_008149	SDOW01000054.1	1778381	1779163	+	548	0.456204	0.064	u	3
1052	TCONS_00023513	XLOC_008167	SDOW01000054.1	3751230	3752241	+	920	0.58587	-0.183673	u	2
1053	TCONS_00023627	XLOC_008211	SDOW01000054.1	1783592	1784146	.	554	0.528881	0.255973	u	1
1054	TCONS_00023628	XLOC_008212	SDOW01000054.1	2682791	2683356	.	565	0.345133	-0.138462	u	1
1055	TCONS_00023630	XLOC_008214	SDOW01000054.1	4172905	4173361	.	456	0.695175	0.179811	u	1
1056	TCONS_00023679	XLOC_008235	SDOW01000055.1	3945578	3950114	+	2723	0.414249	-0.0460993	u	3
1057	TCONS_00023680	XLOC_008235	SDOW01000055.1	3945578	3950114	+	2607	0.411968	-0.0465549	u	4
1058	TCONS_00023682	XLOC_008235	SDOW01000055.1	3945578	3950114	+	678	0.501475	-0.0176471	u	2
1059	TCONS_00023683	XLOC_008235	SDOW01000055.1	3945578	3950114	+	1148	0.461672	-0.0377359	u	3
1060	TCONS_00023684	XLOC_008235	SDOW01000055.1	3945578	3950114	+	1080	0.467593	-0.0178218	u	4
1061	TCONS_00023713	XLOC_008253	SDOW01000055.1	1335481	1337344	-	675	0.437037	0.145763	u	2
1062	TCONS_00023714	XLOC_008253	SDOW01000055.1	1335481	1337344	-	785	0.471338	0.027027	u	2
1063	TCONS_00023731	XLOC_008260	SDOW01000055.1	2537809	2539190	-	822	0.491484	0.019802	u	2
1064	TCONS_00023779	XLOC_008273	SDOW01000055.1	3950677	3951207	.	530	0.367925	-0.148718	u	1
1065	TCONS_00023780	XLOC_008274	SDOW01000055.1	4017175	4030039	.	1137	0.490765	0.0394265	u	1
1066	TCONS_00023781	XLOC_008275	SDOW01000055.1	5378664	5380229	.	1565	0.584665	0.101639	u	1
1067	TCONS_00023843	XLOC_008305	SDOW01000056.1	3511526	3513014	+	1307	0.484315	-0.0710901	u	3
1068	TCONS_00023844	XLOC_008305	SDOW01000056.1	3511526	3513014	+	1343	0.486225	-0.0627871	u	3
1069	TCONS_00023852	XLOC_008310	SDOW01000056.1	4681012	4686050	+	4884	0.38493	0.13617	u	2
1070	TCONS_00023853	XLOC_008310	SDOW01000056.1	4681012	4686050	+	4360	0.38555	0.144557	u	3
1071	TCONS_00023988	XLOC_008353	SDOW01000056.1	4151976	4154699	-	948	0.555907	-0.134725	u	5
1072	TCONS_00023989	XLOC_008353	SDOW01000056.1	4151976	4154699	-	1145	0.560699	-0.155763	u	5
1073	TCONS_00024037	XLOC_008359	SDOW01000056.1	1174009	1174422	.	413	0.702179	-0.324138	u	1
1074	TCONS_00024038	XLOC_008360	SDOW01000056.1	1943276	1943718	.	442	0.452489	-0.09	u	1
1075	TCONS_00024039	XLOC_008361	SDOW01000056.1	2456762	2457027	.	265	0.366038	-0.0309278	u	1
1076	TCONS_00024040	XLOC_008362	SDOW01000056.1	3097541	3097939	.	398	0.389447	0.083871	u	1
1077	TCONS_00024041	XLOC_008363	SDOW01000056.1	3520706	3522936	.	2230	0.416143	0.0646552	u	1
1078	TCONS_00024042	XLOC_008364	SDOW01000056.1	3737350	3738024	.	674	0.425816	-0.114983	u	1
1079	TCONS_00024043	XLOC_008365	SDOW01000056.1	3753152	3753548	.	396	0.532828	-0.0521327	u	1
1080	TCONS_00024044	XLOC_008366	SDOW01000056.1	4137992	4139067	.	1075	0.477209	-0.0838207	u	1
1081	TCONS_00024244	XLOC_008446	SDOW01000057.1	2212156	2216080	-	1113	0.503145	-0.00357143	u	3
1082	TCONS_00024245	XLOC_008446	SDOW01000057.1	2212156	2216080	-	1776	0.497185	0.0509626	u	4
1083	TCONS_00024246	XLOC_008446	SDOW01000057.1	2212156	2216080	-	1821	0.49698	0.0453039	u	5
1084	TCONS_00024247	XLOC_008446	SDOW01000057.1	2212156	2216080	-	1083	0.504155	-0.032967	u	3
1085	TCONS_00024248	XLOC_008446	SDOW01000057.1	2212156	2216080	-	1131	0.505747	-0.027972	u	3
1086	TCONS_00024250	XLOC_008446	SDOW01000057.1	2212156	2216080	-	2225	0.476854	0.0574929	u	3
1087	TCONS_00024251	XLOC_008446	SDOW01000057.1	2212156	2216080	-	2917	0.444978	0.0570108	u	3
1088	TCONS_00024252	XLOC_008446	SDOW01000057.1	2212156	2216080	-	2567	0.455395	0.0384944	u	3
1089	TCONS_00024253	XLOC_008446	SDOW01000057.1	2212156	2216080	-	2944	0.447011	0.0471125	u	3
1090	TCONS_00024255	XLOC_008446	SDOW01000057.1	2212156	2216080	-	1204	0.507475	-0.0507365	u	4
1091	TCONS_00024256	XLOC_008446	SDOW01000057.1	2212156	2216080	-	2479	0.462283	0.008726	u	2
1092	TCONS_00024288	XLOC_008464	SDOW01000057.1	4627695	4628847	-	1061	0.344958	0.0983607	u	2
1093	TCONS_00024289	XLOC_008465	SDOW01000057.1	4629750	4631558	-	651	0.580645	-0.132275	u	3
1094	TCONS_00024299	XLOC_008471	SDOW01000057.1	386809	387679	.	870	0.577011	-0.131474	u	1
1095	TCONS_00024300	XLOC_008472	SDOW01000057.1	1500507	1501944	.	1437	0.572721	-0.0376671	u	1
1096	TCONS_00024301	XLOC_008473	SDOW01000057.1	2411361	2411806	.	445	0.660674	0.0952381	u	1
1097	TCONS_00024302	XLOC_008474	SDOW01000057.1	3012539	3013098	.	559	0.565295	0.0886076	u	1
1098	TCONS_00024303	XLOC_008475	SDOW01000057.1	3215524	3216745	.	1221	0.646192	-0.21166	u	1
1099	TCONS_00024445	XLOC_008521	SDOW01000058.1	4767097	4768169	+	661	0.547655	0.0497238	u	3
1100	TCONS_00024463	XLOC_008529	SDOW01000058.1	648078	649015	-	358	0.50838	0.0879121	x	2
1101	TCONS_00024507	XLOC_008549	SDOW01000058.1	2291324	2301973	-	2540	0.442913	0.0133333	x	9
1102	TCONS_00024508	XLOC_008549	SDOW01000058.1	2291324	2301973	-	2817	0.451189	0.0118017	x	11
1103	TCONS_00024581	XLOC_008580	SDOW01000058.1	4866982	4870324	-	469	0.503198	-0.152542	u	3
1104	TCONS_00024595	XLOC_008584	SDOW01000058.1	184093	184804	.	711	0.578059	-0.211679	u	1
1105	TCONS_00024597	XLOC_008586	SDOW01000058.1	4160661	4160934	.	273	0.538462	-0.0204082	u	1
1106	TCONS_00024598	XLOC_008587	SDOW01000058.1	4863627	4864564	.	937	0.404482	0.055409	u	1
1107	TCONS_00024599	XLOC_008588	SDOW01000058.1	4864633	4865029	.	396	0.434343	0.360465	u	1
1108	TCONS_00024600	XLOC_008589	SDOW01000058.1	4865592	4866085	.	493	0.395538	0.2	u	1
1109	TCONS_00024679	XLOC_008617	SDOW01000059.1	6175655	6180840	+	799	0.503129	0.0895522	x	2
1110	TCONS_00024708	XLOC_008632	SDOW01000059.1	9900564	9902687	+	1719	0.497382	-0.0923977	u	3
1111	TCONS_00024709	XLOC_008632	SDOW01000059.1	9900564	9902687	+	1228	0.54316	-0.13943	u	4
1112	TCONS_00024710	XLOC_008632	SDOW01000059.1	9900564	9902687	+	1085	0.556682	-0.162252	u	4
1113	TCONS_00024711	XLOC_008632	SDOW01000059.1	9900564	9902687	+	990	0.559596	-0.191336	u	3
1114	TCONS_00024712	XLOC_008632	SDOW01000059.1	9900564	9902687	+	1461	0.533196	-0.121951	u	3
1115	TCONS_00024713	XLOC_008632	SDOW01000059.1	9900564	9902687	+	1952	0.495389	-0.0837642	u	2
1116	TCONS_00024855	XLOC_008681	SDOW01000059.1	9330749	9334904	-	2154	0.429434	-0.130811	u	3
1117	TCONS_00024856	XLOC_008681	SDOW01000059.1	9330749	9334904	-	2174	0.429623	-0.12848	u	3
1118	TCONS_00024857	XLOC_008681	SDOW01000059.1	9330749	9334904	-	2235	0.42774	-0.115063	u	3
1119	TCONS_00024858	XLOC_008681	SDOW01000059.1	9330749	9334904	-	2228	0.427738	-0.118573	u	3
1120	TCONS_00024859	XLOC_008681	SDOW01000059.1	9330749	9334904	-	1723	0.450377	-0.157216	u	3
1121	TCONS_00024860	XLOC_008681	SDOW01000059.1	9330749	9334904	-	1721	0.449739	-0.162791	u	3
1122	TCONS_00024861	XLOC_008681	SDOW01000059.1	9330749	9334904	-	2909	0.40495	-0.0916808	u	2
1123	TCONS_00024862	XLOC_008681	SDOW01000059.1	9330749	9334904	-	2193	0.430461	-0.135593	u	3
1124	TCONS_00024868	XLOC_008684	SDOW01000059.1	9900564	9902687	-	1114	0.405745	-0.128319	u	2
1125	TCONS_00024874	XLOC_008688	SDOW01000059.1	10510284	10515533	-	1327	0.431047	0.0314685	u	1
1126	TCONS_00024879	XLOC_008690	SDOW01000059.1	1444526	1445121	.	595	0.546218	-0.0584615	u	1
1127	TCONS_00024881	XLOC_008692	SDOW01000059.1	3047164	3048529	.	1365	0.482784	0.00758725	u	1
1128	TCONS_00024882	XLOC_008693	SDOW01000059.1	5060612	5061286	.	674	0.356083	-0.216667	u	1
1129	TCONS_00024883	XLOC_008694	SDOW01000059.1	5061926	5062602	.	676	0.510355	-0.0376812	u	1
1130	TCONS_00024884	XLOC_008695	SDOW01000059.1	6701695	6702243	.	548	0.534672	0.0170648	u	1
1131	TCONS_00024885	XLOC_008696	SDOW01000059.1	8966412	8973329	.	292	0.424658	-0.016129	u	1
1132	TCONS_00024886	XLOC_008697	SDOW01000059.1	10505861	10509739	.	3878	0.447396	-0.0121037	u	1
1133	TCONS_00025017	XLOC_008742	SDOW01000060.1	4306080	4306952	+	601	0.392679	0.0254237	u	2
1134	TCONS_00025018	XLOC_008742	SDOW01000060.1	4306080	4306952	+	430	0.4	0.104651	u	2
1135	TCONS_00025095	XLOC_008767	SDOW01000060.1	267271	270139	-	1190	0.520168	0.0468498	u	4
1136	TCONS_00025096	XLOC_008767	SDOW01000060.1	267271	270139	-	1213	0.517725	0.044586	u	5
1137	TCONS_00025097	XLOC_008767	SDOW01000060.1	267271	270139	-	1709	0.477472	0.10049	u	5
1138	TCONS_00025217	XLOC_008798	SDOW01000060.1	2876811	2877992	-	480	0.604167	-0.131034	u	4
1139	TCONS_00025218	XLOC_008798	SDOW01000060.1	2876811	2877992	-	323	0.659443	-0.15493	u	3
1140	TCONS_00025337	XLOC_008831	SDOW01000060.1	735841	736380	.	539	0.602968	-0.335385	u	1
1141	TCONS_00025340	XLOC_008834	SDOW01000060.1	1060369	1061044	.	675	0.543704	0.0027248	u	1
1142	TCONS_00025341	XLOC_008835	SDOW01000060.1	2875118	2875335	.	217	0.437788	-0.0105263	u	1
1143	TCONS_00025343	XLOC_008837	SDOW01000060.1	3310299	3310508	.	209	0.397129	0.301205	u	1
1144	TCONS_00025344	XLOC_008838	SDOW01000060.1	4307012	4307536	.	524	0.351145	0.0108696	u	1
1145	TCONS_00025345	XLOC_008839	SDOW01000060.1	5013754	5015157	.	1403	0.354954	-0.0763052	u	1
1146	TCONS_00025346	XLOC_008840	SDOW01000060.1	5186105	5186502	.	397	0.56927	0.0619469	u	1
1147	TCONS_00025367	XLOC_008850	SDOW01000061.1	1285093	1292774	+	727	0.382393	0.00719425	u	3
1148	TCONS_00025431	XLOC_008861	SDOW01000061.1	2435345	2437486	+	580	0.475862	0	u	1
1149	TCONS_00025432	XLOC_008862	SDOW01000061.1	2437874	2439175	+	964	0.561203	-0.0573013	u	2
1150	TCONS_00025433	XLOC_008862	SDOW01000061.1	2437874	2439175	+	1301	0.514988	-0.0208955	u	1
1151	TCONS_00025454	XLOC_008869	SDOW01000061.1	2936615	2940698	+	888	0.454955	-0.039604	u	1
1152	TCONS_00025457	XLOC_008871	SDOW01000061.1	2942980	2943501	+	521	0.40691	-0.179245	u	1
1153	TCONS_00025464	XLOC_008877	SDOW01000061.1	2947409	2955922	+	1086	0.532228	0.017301	u	1
1154	TCONS_00025531	XLOC_008898	SDOW01000061.1	3931975	3934961	+	983	0.46999	0.229437	u	3
1155	TCONS_00025573	XLOC_008910	SDOW01000061.1	4485114	4490250	+	395	0.602532	-0.0756303	u	1
1156	TCONS_00025578	XLOC_008911	SDOW01000061.1	4505163	4508716	+	541	0.345656	0.176471	u	1
1157	TCONS_00025756	XLOC_008972	SDOW01000061.1	2947409	2955922	-	315	0.67619	-0.0704225	u	2
1158	TCONS_00025882	XLOC_009005	SDOW01000061.1	4485114	4490250	-	1545	0.442071	-0.00146413	u	3
1159	TCONS_00025883	XLOC_009005	SDOW01000061.1	4485114	4490250	-	2345	0.423028	-0.0403226	u	3
1160	TCONS_00025885	XLOC_009005	SDOW01000061.1	4485114	4490250	-	2616	0.414755	-0.0654378	u	2
1161	TCONS_00025925	XLOC_009022	SDOW01000061.1	5534168	5536134	-	563	0.490231	-0.0217391	u	2
1162	TCONS_00025985	XLOC_009049	SDOW01000061.1	5404899	5405813	.	914	0.621444	-0.0633803	u	1
1163	TCONS_00025986	XLOC_009050	SDOW01000061.1	5695097	5695441	.	344	0.633721	-0.0183486	u	1
1164	TCONS_00025988	XLOC_009052	SDOW01000061.1	5716882	5717416	.	534	0.488764	-0.0957854	u	1
1165	TCONS_00026185	XLOC_009107	SDOW01000062.1	4053503	4054291	-	699	0.597997	-0.0143541	u	2
1166	TCONS_00026200	XLOC_009112	SDOW01000062.1	1945184	1945503	.	319	0.639498	0.107843	u	1
1167	TCONS_00026201	XLOC_009113	SDOW01000062.1	4693107	4693997	.	890	0.492135	0.0639269	u	1
1168	TCONS_00026272	XLOC_009141	SDOW01000063.1	2330268	2330910	+	511	0.526419	-0.0334573	u	2
1169	TCONS_00026343	XLOC_009171	SDOW01000063.1	5265008	5271923	+	742	0.401617	0.255034	u	1
1170	TCONS_00026447	XLOC_009215	SDOW01000063.1	9751530	9755016	+	580	0.413793	0.2	u	3
1171	TCONS_00026569	XLOC_009263	SDOW01000063.1	16342245	16348519	+	770	0.497403	-0.112272	u	2
1172	TCONS_00026659	XLOC_009301	SDOW01000063.1	3783461	3786018	-	1385	0.568953	-0.109137	u	3
1173	TCONS_00026703	XLOC_009316	SDOW01000063.1	6396850	6397933	-	483	0.443064	0.205607	u	2
1174	TCONS_00026777	XLOC_009341	SDOW01000063.1	10056036	10058816	-	1456	0.411401	0.0283806	u	4
1175	TCONS_00026843	XLOC_009360	SDOW01000063.1	12667245	12670051	-	686	0.505831	-0.0259366	u	3
1176	TCONS_00026844	XLOC_009360	SDOW01000063.1	12667245	12670051	-	1318	0.457511	0.0679934	u	3
1177	TCONS_00026847	XLOC_009360	SDOW01000063.1	12667245	12670051	-	2679	0.442703	0.084317	u	2
1178	TCONS_00026892	XLOC_009377	SDOW01000063.1	16342245	16348519	-	2124	0.416196	0.081448	u	7
1179	TCONS_00026893	XLOC_009377	SDOW01000063.1	16342245	16348519	-	2344	0.43302	0.0423645	u	8
1180	TCONS_00026894	XLOC_009377	SDOW01000063.1	16342245	16348519	-	2289	0.437309	0.012987	u	6
1181	TCONS_00026895	XLOC_009377	SDOW01000063.1	16342245	16348519	-	2217	0.438881	0.0256937	u	7
1182	TCONS_00026896	XLOC_009377	SDOW01000063.1	16342245	16348519	-	2289	0.43993	0.0268123	u	7
1183	TCONS_00026897	XLOC_009377	SDOW01000063.1	16342245	16348519	-	2306	0.437988	0.0237624	u	8
1184	TCONS_00026898	XLOC_009377	SDOW01000063.1	16342245	16348519	-	2416	0.439156	0.0197926	u	8
1185	TCONS_00026899	XLOC_009377	SDOW01000063.1	16342245	16348519	-	2387	0.442815	0.0236518	u	10
1186	TCONS_00026900	XLOC_009377	SDOW01000063.1	16342245	16348519	-	2435	0.441478	0.0176744	u	9
1187	TCONS_00026901	XLOC_009377	SDOW01000063.1	16342245	16348519	-	2468	0.437601	0.0351852	u	7
1188	TCONS_00026902	XLOC_009377	SDOW01000063.1	16342245	16348519	-	2431	0.442205	0.0232558	u	10
1189	TCONS_00026904	XLOC_009377	SDOW01000063.1	16342245	16348519	-	2464	0.439935	0.0221402	u	10
1190	TCONS_00026905	XLOC_009377	SDOW01000063.1	16342245	16348519	-	2395	0.440501	0.0180095	u	10
1191	TCONS_00026907	XLOC_009378	SDOW01000063.1	1853378	1853868	.	490	0.530612	-0.184615	u	1
1192	TCONS_00026908	XLOC_009379	SDOW01000063.1	5265008	5271923	.	632	0.379747	0.0666667	u	1
1193	TCONS_00026909	XLOC_009380	SDOW01000063.1	6172035	6172509	.	474	0.664557	0.193651	u	1
1194	TCONS_00026910	XLOC_009381	SDOW01000063.1	6258124	6258957	.	833	0.587035	-0.190184	u	1
1195	TCONS_00026911	XLOC_009382	SDOW01000063.1	7460733	7461672	.	939	0.487753	0.122271	u	1
1196	TCONS_00026912	XLOC_009383	SDOW01000063.1	7464599	7465259	.	660	0.571212	-0.0875332	u	1
1197	TCONS_00026913	XLOC_009384	SDOW01000063.1	8678261	8678933	.	672	0.483631	-0.150769	u	1
1198	TCONS_00026914	XLOC_009385	SDOW01000063.1	9768798	9769255	.	457	0.365427	-0.101796	u	1
1199	TCONS_00026915	XLOC_009386	SDOW01000063.1	9984532	9985129	.	597	0.536013	0.025	u	1
1200	TCONS_00026916	XLOC_009387	SDOW01000063.1	11177858	11178764	.	906	0.575055	-0.00575816	u	1
1201	TCONS_00026918	XLOC_009389	SDOW01000063.1	12652733	12658323	.	1533	0.506197	-0.110825	u	1
1202	TCONS_00026921	XLOC_009392	SDOW01000063.1	14406991	14407504	.	513	0.522417	0.00746269	u	1
1203	TCONS_00026922	XLOC_009393	SDOW01000063.1	15101541	15101954	.	413	0.438257	0.20442	u	1
1204	TCONS_00026923	XLOC_009394	SDOW01000063.1	15102275	15102868	.	593	0.510961	0.0495049	u	1
1205	TCONS_00027135	XLOC_009485	SDOW01000064.1	4223981	4225506	+	747	0.445783	0.003003	u	4
1206	TCONS_00027166	XLOC_009498	SDOW01000064.1	5871296	5873787	+	709	0.572638	-0.157635	u	5
1207	TCONS_00027167	XLOC_009498	SDOW01000064.1	5871296	5873787	+	602	0.591362	-0.134831	u	5
1208	TCONS_00027168	XLOC_009498	SDOW01000064.1	5871296	5873787	+	556	0.606115	-0.151335	u	4
1209	TCONS_00027195	XLOC_009513	SDOW01000064.1	7938729	7941316	+	987	0.496454	-0.00816326	u	3
1210	TCONS_00027196	XLOC_009513	SDOW01000064.1	7938729	7941316	+	1770	0.468927	-0.00722892	u	2
1211	TCONS_00027447	XLOC_009619	SDOW01000064.1	2101990	2107446	-	1169	0.498717	0.025729	u	4
1212	TCONS_00027753	XLOC_009702	SDOW01000064.1	9143519	9149067	-	1003	0.391825	-0.0636132	u	2
1213	TCONS_00027756	XLOC_009702	SDOW01000064.1	9143519	9149067	-	1491	0.462777	-0.0115942	u	3
1214	TCONS_00027820	XLOC_009731	SDOW01000064.1	12532967	12537016	-	1005	0.472637	-0.28	u	4
1215	TCONS_00027835	XLOC_009738	SDOW01000064.1	290337	290770	.	433	0.635104	0.272727	u	1
1216	TCONS_00027836	XLOC_009739	SDOW01000064.1	578444	582263	.	683	0.408492	-0.189964	u	1
1217	TCONS_00027837	XLOC_009740	SDOW01000064.1	657980	658512	.	532	0.466165	-0.00806452	u	1
1218	TCONS_00027838	XLOC_009741	SDOW01000064.1	753904	754340	.	436	0.392202	-0.00584795	u	1
1219	TCONS_00027839	XLOC_009742	SDOW01000064.1	3123761	3124379	.	618	0.558252	0.113043	u	1
1220	TCONS_00027843	XLOC_009746	SDOW01000064.1	5278329	5278892	.	563	0.614565	0.416185	u	1
1221	TCONS_00027844	XLOC_009747	SDOW01000064.1	5893118	5893322	.	204	0.681373	0.136691	u	1
1222	TCONS_00027847	XLOC_009750	SDOW01000064.1	7595394	7595775	.	381	0.656168	0.144	u	1
1223	TCONS_00027848	XLOC_009751	SDOW01000064.1	8280849	8281859	.	1010	0.560396	-0.151943	u	1
1224	TCONS_00027849	XLOC_009752	SDOW01000064.1	8329955	8330202	.	247	0.421053	-0.0384615	u	1
1225	TCONS_00027850	XLOC_009753	SDOW01000064.1	9143519	9149067	.	428	0.371495	0.0314465	u	1
1226	TCONS_00027851	XLOC_009754	SDOW01000064.1	9143519	9149067	.	1037	0.362584	0.0904255	u	1
1227	TCONS_00027852	XLOC_009755	SDOW01000064.1	9149370	9150643	.	1273	0.497251	0.21643	u	1
1228	TCONS_00027853	XLOC_009756	SDOW01000064.1	9223413	9223974	.	561	0.43672	0.126531	u	1
1229	TCONS_00027854	XLOC_009757	SDOW01000064.1	11656609	11657165	.	556	0.485612	-0.207407	u	1
1230	TCONS_00027855	XLOC_009758	SDOW01000064.1	12532967	12537016	.	533	0.371482	0.0505051	u	1
1231	TCONS_00027856	XLOC_009759	SDOW01000064.1	12537201	12537450	.	249	0.48996	-0.0655738	u	1
1232	TCONS_00028016	XLOC_009828	SDOW01000065.1	159217	159449	.	232	0.392241	0.120879	u	1
1233	TCONS_00028017	XLOC_009829	SDOW01000065.1	164666	164893	.	227	0.405286	0.130435	u	1
1234	TCONS_00028018	XLOC_009830	SDOW01000065.1	2315647	2315972	.	325	0.593846	0.274611	u	1
1235	TCONS_00028019	XLOC_009831	SDOW01000065.1	2318482	2319268	.	786	0.52799	0.0698795	u	1
1236	TCONS_00028184	XLOC_009903	SDOW01000066.1	7158012	7159691	+	1533	0.484018	0.0512129	u	2
1237	TCONS_00028220	XLOC_009917	SDOW01000066.1	1531006	1533638	-	690	0.502899	-0.129683	x	4
1238	TCONS_00028243	XLOC_009927	SDOW01000066.1	3470449	3470956	-	399	0.446115	-0.0674157	u	2
1239	TCONS_00028379	XLOC_009975	SDOW01000066.1	6204893	6206214	-	627	0.601276	0.108753	u	2
1240	TCONS_00028434	XLOC_010001	SDOW01000066.1	899753	900479	.	726	0.476584	-0.0924855	u	1
1241	TCONS_00028436	XLOC_010003	SDOW01000066.1	3943147	3943497	.	350	0.417143	0.0410959	u	1
1242	TCONS_00028439	XLOC_010006	SDOW01000066.1	5210846	5211619	.	773	0.716688	0.0830325	u	1
1243	TCONS_00028440	XLOC_010007	SDOW01000066.1	5284059	5284618	.	559	0.592129	-0.208459	u	1
1244	TCONS_00028687	XLOC_010092	SDOW01000067.1	1795112	1797410	-	1580	0.536076	-0.121606	u	5
1245	TCONS_00028690	XLOC_010092	SDOW01000067.1	1795112	1797410	-	2200	0.491818	-0.0887246	u	2
1246	TCONS_00028785	XLOC_010138	SDOW01000067.1	267714	269174	.	1460	0.436301	-0.133438	u	1
1247	TCONS_00028786	XLOC_010139	SDOW01000067.1	4981381	4981935	.	554	0.548736	0.151316	u	1
1248	TCONS_00028787	XLOC_010140	SDOW01000068.1	64753	67583	+	600	0.415	-0.148594	u	1
1249	TCONS_00029047	XLOC_010241	SDOW01000068.1	211714	214278	-	363	0.38292	0.0935252	u	2
1250	TCONS_00029096	XLOC_010252	SDOW01000068.1	723748	730667	-	1036	0.40251	-0.0359712	u	1
1251	TCONS_00029097	XLOC_010252	SDOW01000068.1	723748	730667	-	714	0.459384	-0.182927	u	3
1252	TCONS_00029258	XLOC_010299	SDOW01000068.1	3585209	3587344	-	1025	0.470244	0.0746888	u	3
1253	TCONS_00029259	XLOC_010299	SDOW01000068.1	3585209	3587344	-	1640	0.457927	0.00665779	u	5
1254	TCONS_00029288	XLOC_010316	SDOW01000068.1	214395	215241	.	846	0.615839	-0.132438	u	1
1255	TCONS_00029289	XLOC_010317	SDOW01000068.1	270750	271187	.	437	0.494279	0.0462963	u	1
1256	TCONS_00029290	XLOC_010318	SDOW01000068.1	273682	274148	.	466	0.459227	0.0280374	u	1
1257	TCONS_00029292	XLOC_010320	SDOW01000068.1	603186	604403	.	1217	0.458505	-0.046595	u	1
1258	TCONS_00029293	XLOC_010321	SDOW01000068.1	887651	888108	.	457	0.472648	0.0833333	u	1
1259	TCONS_00029296	XLOC_010324	SDOW01000068.1	2421811	2422667	.	856	0.529206	0.00220751	u	1
1260	TCONS_00029298	XLOC_010326	SDOW01000068.1	3591046	3591567	.	521	0.335893	-0.0514286	u	1
1261	TCONS_00029299	XLOC_010327	SDOW01000068.1	3594880	3595281	.	401	0.421446	-0.0532544	u	1
1262	TCONS_00029300	XLOC_010328	SDOW01000068.1	3632567	3633182	.	615	0.38374	-0.135593	u	1
1263	TCONS_00029517	XLOC_010384	SDOW01000069.1	4241960	4243548	+	861	0.415796	0.106145	u	4
1264	TCONS_00029518	XLOC_010384	SDOW01000069.1	4241960	4243548	+	507	0.400394	0.0738916	u	3
1265	TCONS_00029532	XLOC_010392	SDOW01000069.1	5835448	5837489	+	1236	0.364887	-0.0687361	u	1
1266	TCONS_00029535	XLOC_010394	SDOW01000069.1	5844351	5845149	+	276	0.557971	-0.233766	u	2
1267	TCONS_00029659	XLOC_010429	SDOW01000069.1	2259035	2260164	-	1037	0.522662	-0.0590406	u	2
1268	TCONS_00029830	XLOC_010480	SDOW01000069.1	4406241	4408064	-	616	0.413961	0.247059	u	6
1269	TCONS_00029839	XLOC_010487	SDOW01000069.1	5835448	5837489	-	699	0.397711	0.107914	u	2
1270	TCONS_00029840	XLOC_010487	SDOW01000069.1	5835448	5837489	-	933	0.367631	0.0379009	u	2
1271	TCONS_00029888	XLOC_010505	SDOW01000069.1	3743017	3743441	.	424	0.294811	-0.296	u	1
1272	TCONS_00029889	XLOC_010506	SDOW01000069.1	4240724	4241824	.	1100	0.685455	0.100796	u	1
1273	TCONS_00029890	XLOC_010507	SDOW01000069.1	4709348	4709854	.	506	0.592885	-0.266667	u	1
1274	TCONS_00029891	XLOC_010508	SDOW01000069.1	4914641	4919652	.	992	0.644153	-0.0985916	u	1
1275	TCONS_00029893	XLOC_010510	SDOW01000069.1	8023436	8023792	.	356	0.676966	-0.211618	u	1
1276	TCONS_00030084	XLOC_010557	SDOW01000070.1	735240	735526	.	286	0.56993	-0.0552147	u	1
1277	TCONS_00030085	XLOC_010558	SDOW01000070.1	1564372	1564884	.	512	0.636719	-0.306748	u	1
1278	TCONS_00030086	XLOC_010559	SDOW01000070.1	2322199	2322769	.	570	0.587719	-0.223881	u	1
1279	TCONS_00030087	XLOC_010560	SDOW01000070.1	2332386	2332809	.	423	0.456265	-0.0466321	u	1
1280	TCONS_00030088	XLOC_010561	SDOW01000070.1	2726493	2726703	.	210	0.314286	0.030303	u	1
1281	TCONS_00030089	XLOC_010562	SDOW01000070.1	3570278	3570550	.	272	0.408088	0.0630631	u	1
1282	TCONS_00030136	XLOC_010580	SDOW01000071.1	1410930	1414187	+	783	0.416347	0.0736196	u	3
1283	TCONS_00030226	XLOC_010630	SDOW01000071.1	1932969	1935576	-	701	0.473609	-0.0301205	u	2
1284	TCONS_00030227	XLOC_010630	SDOW01000071.1	1932969	1935576	-	1014	0.510848	-0.027027	u	2
1285	TCONS_00030255	XLOC_010645	SDOW01000071.1	4846096	4852131	-	570	0.450877	0.0817121	u	4
1286	TCONS_00030257	XLOC_010645	SDOW01000071.1	4846096	4852131	-	1064	0.415414	0.0497738	u	3
1287	TCONS_00030296	XLOC_010654	SDOW01000071.1	4861668	4861956	.	288	0.559028	-0.10559	u	1
1288	TCONS_00030301	XLOC_010659	SDOW01000071.1	4883948	4884830	.	882	0.585034	0.189922	u	1
1289	TCONS_00030302	XLOC_010660	SDOW01000071.1	4885049	4887111	.	2062	0.464597	-0.0563674	u	1
1290	TCONS_00030305	XLOC_010662	SDOW01000072.1	256612	260026	+	767	0.517601	0.108312	u	1
1291	TCONS_00030306	XLOC_010662	SDOW01000072.1	256612	260026	+	837	0.51135	0.0981308	u	2
1292	TCONS_00030475	XLOC_010714	SDOW01000072.1	5583310	5584112	+	655	0.476336	0.115385	u	2
1293	TCONS_00030487	XLOC_010717	SDOW01000072.1	5888499	5895110	+	966	0.510352	-0.0263692	x	3
1294	TCONS_00030488	XLOC_010717	SDOW01000072.1	5888499	5895110	+	626	0.523962	-0.0243902	x	2
1295	TCONS_00030550	XLOC_010743	SDOW01000072.1	545544	548139	-	1058	0.494329	0.00956023	u	5
1296	TCONS_00030551	XLOC_010743	SDOW01000072.1	545544	548139	-	1175	0.485957	0.0122592	u	6
1297	TCONS_00030552	XLOC_010743	SDOW01000072.1	545544	548139	-	1673	0.444112	0.0228802	u	4
1298	TCONS_00030553	XLOC_010743	SDOW01000072.1	545544	548139	-	2298	0.420801	0.00930714	u	3
1299	TCONS_00030555	XLOC_010743	SDOW01000072.1	545544	548139	-	1562	0.455826	-0.0224719	u	5
1300	TCONS_00030566	XLOC_010748	SDOW01000072.1	1609399	1613262	-	1415	0.489046	-0.0924855	x	2
1301	TCONS_00030606	XLOC_010767	SDOW01000072.1	5134417	5142772	-	2714	0.441415	-0.066778	x	9
1302	TCONS_00030610	XLOC_010767	SDOW01000072.1	5134417	5142772	-	4044	0.410732	-0.0319085	x	8
1303	TCONS_00030611	XLOC_010767	SDOW01000072.1	5134417	5142772	-	1487	0.518494	-0.118029	u	5
1304	TCONS_00030612	XLOC_010767	SDOW01000072.1	5134417	5142772	-	2149	0.397859	-0.0385965	u	3
1305	TCONS_00030615	XLOC_010769	SDOW01000072.1	5576523	5581310	-	561	0.467023	0.129771	j	2
1306	TCONS_00030656	XLOC_010787	SDOW01000072.1	2452414	2452756	.	342	0.435673	-0.100671	u	1
1307	TCONS_00030777	XLOC_010835	SDOW01000073.1	4258979	4264585	.	270	0.422222	0.0877193	u	1
1308	TCONS_00030778	XLOC_010836	SDOW01000073.1	4409695	4410591	.	896	0.40625	-0.142857	u	1
1309	TCONS_00030779	XLOC_010837	SDOW01000073.1	4410989	4411544	.	555	0.454054	-0.0714286	u	1
1310	TCONS_00030867	XLOC_010872	SDOW01000074.1	332361	336679	-	809	0.480841	-0.0899743	x	2
1311	TCONS_00030882	XLOC_010880	SDOW01000074.1	1014122	1015501	-	1171	0.444919	0.0863724	j	3
1312	TCONS_00031008	XLOC_010920	SDOW01000074.1	2645306	2645998	.	692	0.586705	0.0295567	u	1
1313	TCONS_00031009	XLOC_010921	SDOW01000074.1	4969026	4969488	.	462	0.448052	-0.333333	u	1
1314	TCONS_00031025	XLOC_010929	SDOW01000075.1	1718104	1719378	+	1079	0.588508	-0.146457	u	2
1315	TCONS_00031026	XLOC_010929	SDOW01000075.1	1718104	1719378	+	1084	0.587638	-0.142857	u	2
1316	TCONS_00031042	XLOC_010934	SDOW01000075.1	2352682	2353687	+	726	0.520661	-0.042328	o	2
1317	TCONS_00031046	XLOC_010935	SDOW01000075.1	2356574	2366173	+	266	0.631579	0.0238095	u	2
1318	TCONS_00031066	XLOC_010945	SDOW01000075.1	4592009	4595824	+	548	0.461679	0.0434783	u	2
1319	TCONS_00031116	XLOC_010970	SDOW01000075.1	2853363	2854817	-	967	0.546019	-0.0151515	u	3
1320	TCONS_00031149	XLOC_010977	SDOW01000075.1	3334788	3336284	-	1323	0.353741	0.0042735	u	2
1321	TCONS_00031150	XLOC_010977	SDOW01000075.1	3334788	3336284	-	520	0.425	0.140271	u	3
1322	TCONS_00031151	XLOC_010977	SDOW01000075.1	3334788	3336284	-	1381	0.358436	0.0181818	u	2
1323	TCONS_00031169	XLOC_010986	SDOW01000075.1	291618	292255	.	637	0.681319	-0.18894	u	1
1324	TCONS_00031171	XLOC_010988	SDOW01000075.1	453708	454154	.	446	0.596413	0.300752	u	1
1325	TCONS_00031172	XLOC_010989	SDOW01000075.1	1236011	1236724	.	713	0.611501	0.215596	u	1
1326	TCONS_00031173	XLOC_010990	SDOW01000075.1	1669435	1670234	.	799	0.475594	-0.121053	u	1
1327	TCONS_00031175	XLOC_010992	SDOW01000075.1	1725006	1726412	.	1406	0.559744	0.275731	u	1
1328	TCONS_00031177	XLOC_010994	SDOW01000075.1	3336798	3337133	.	335	0.355224	0.0252101	u	1
1329	TCONS_00031181	XLOC_010996	SDOW01000076.1	335575	344284	+	1756	0.472665	-0.0746988	u	4
1330	TCONS_00031182	XLOC_010996	SDOW01000076.1	335575	344284	+	2037	0.456063	-0.0548977	u	6
1331	TCONS_00031183	XLOC_010996	SDOW01000076.1	335575	344284	+	1568	0.476403	-0.0923695	u	3
1332	TCONS_00031186	XLOC_010996	SDOW01000076.1	335575	344284	+	1004	0.515936	-0.0579151	u	4
1333	TCONS_00031188	XLOC_010996	SDOW01000076.1	335575	344284	+	1727	0.47018	-0.0788177	u	4
1334	TCONS_00031219	XLOC_011007	SDOW01000076.1	2237148	2243123	+	5880	0.377551	0.00990991	j	2
1335	TCONS_00031250	XLOC_011021	SDOW01000076.1	3766757	3778122	+	1253	0.397446	0.00401606	u	3
1336	TCONS_00031252	XLOC_011021	SDOW01000076.1	3766757	3778122	+	1508	0.383952	0.0259067	u	3
1337	TCONS_00031258	XLOC_011022	SDOW01000076.1	3778612	3783739	+	725	0.507586	-0.0597826	u	2
1338	TCONS_00031272	XLOC_011027	SDOW01000076.1	495308	499680	-	3541	0.439141	-0.014791	u	3
1339	TCONS_00031276	XLOC_011027	SDOW01000076.1	495308	499680	-	3047	0.436823	-0.026296	u	4
1340	TCONS_00031278	XLOC_011027	SDOW01000076.1	495308	499680	-	3140	0.452229	-0.0394366	u	3
1341	TCONS_00031279	XLOC_011027	SDOW01000076.1	495308	499680	-	3212	0.450809	-0.0414365	u	4
1342	TCONS_00031280	XLOC_011027	SDOW01000076.1	495308	499680	-	3048	0.454068	-0.0361272	u	4
1343	TCONS_00031281	XLOC_011027	SDOW01000076.1	495308	499680	-	1774	0.513529	-0.00329308	u	5
1344	TCONS_00031282	XLOC_011027	SDOW01000076.1	495308	499680	-	1663	0.520746	-0.0184757	u	4
1345	TCONS_00031284	XLOC_011027	SDOW01000076.1	495308	499680	-	1962	0.492864	-0.0113754	u	5
1346	TCONS_00031285	XLOC_011027	SDOW01000076.1	495308	499680	-	2290	0.470306	0.00464253	u	4
1347	TCONS_00031286	XLOC_011027	SDOW01000076.1	495308	499680	-	2270	0.450661	-0.0185728	u	5
1348	TCONS_00031288	XLOC_011027	SDOW01000076.1	495308	499680	-	2963	0.442119	-0.00763359	u	3
1349	TCONS_00031289	XLOC_011027	SDOW01000076.1	495308	499680	-	3116	0.44095	-0.0305677	u	5
1350	TCONS_00031291	XLOC_011027	SDOW01000076.1	495308	499680	-	1603	0.476606	-0.0078534	u	5
1351	TCONS_00031294	XLOC_011027	SDOW01000076.1	495308	499680	-	1869	0.499197	-0.0289389	u	4
1352	TCONS_00031296	XLOC_011027	SDOW01000076.1	495308	499680	-	2956	0.441813	-0.00918836	u	3
1353	TCONS_00031297	XLOC_011027	SDOW01000076.1	495308	499680	-	2318	0.459448	-0.000938967	u	5
1354	TCONS_00031298	XLOC_011027	SDOW01000076.1	495308	499680	-	3480	0.441092	-0.0149837	u	4
1355	TCONS_00031299	XLOC_011027	SDOW01000076.1	495308	499680	-	2287	0.470485	0.00185874	u	4
1356	TCONS_00031301	XLOC_011027	SDOW01000076.1	495308	499680	-	2459	0.45181	-0.0639064	u	4
1357	TCONS_00031302	XLOC_011027	SDOW01000076.1	495308	499680	-	2284	0.470228	0.0018622	u	4
1358	TCONS_00031303	XLOC_011027	SDOW01000076.1	495308	499680	-	1857	0.498654	-0.0302376	u	4
1359	TCONS_00031304	XLOC_011027	SDOW01000076.1	495308	499680	-	3284	0.432704	-0.0316678	u	4
1360	TCONS_00031305	XLOC_011027	SDOW01000076.1	495308	499680	-	2210	0.481448	-0.0206767	u	5
1361	TCONS_00031306	XLOC_011027	SDOW01000076.1	495308	499680	-	2960	0.44223	-0.00993125	u	3
1362	TCONS_00031307	XLOC_011027	SDOW01000076.1	495308	499680	-	2517	0.461661	-0.00344234	u	4
1363	TCONS_00031388	XLOC_011062	SDOW01000076.1	1458070	1458969	.	899	0.614016	0.289855	u	1
1364	TCONS_00031389	XLOC_011063	SDOW01000076.1	4025752	4026412	.	660	0.457576	-0.0993378	u	1
1365	TCONS_00031390	XLOC_011064	SDOW01000076.1	4115005	4115563	.	558	0.5	-0.0896057	u	1
1366	TCONS_00031486	XLOC_011095	SDOW01000077.1	3340932	3341355	+	325	0.683077	-0.189189	u	2
1367	TCONS_00031608	XLOC_011133	SDOW01000077.1	6272103	6273066	+	372	0.567204	-0.374408	x	1
1368	TCONS_00031654	XLOC_011153	SDOW01000077.1	7343926	7346006	+	1192	0.439597	0.133588	u	7
1369	TCONS_00031655	XLOC_011153	SDOW01000077.1	7343926	7346006	+	665	0.440602	0.112628	u	4
1370	TCONS_00031685	XLOC_011162	SDOW01000077.1	7882890	7887098	+	1448	0.458564	0.0451807	u	5
1371	TCONS_00031696	XLOC_011166	SDOW01000077.1	8238631	8239718	+	608	0.59375	0.0969529	u	2
1372	TCONS_00031697	XLOC_011166	SDOW01000077.1	8238631	8239718	+	948	0.510549	0.103306	u	2
1373	TCONS_00031756	XLOC_011188	SDOW01000077.1	1760572	1763049	-	543	0.585635	0.176101	x	2
1374	TCONS_00031757	XLOC_011188	SDOW01000077.1	1760572	1763049	-	576	0.583333	0.178571	x	2
1375	TCONS_00031761	XLOC_011190	SDOW01000077.1	2065664	2067575	-	1716	0.405012	0.0129496	u	3
1376	TCONS_00031762	XLOC_011190	SDOW01000077.1	2065664	2067575	-	1217	0.429745	-0.00573614	u	4
1377	TCONS_00031763	XLOC_011190	SDOW01000077.1	2065664	2067575	-	970	0.429897	0.0359712	u	3
1378	TCONS_00031805	XLOC_011207	SDOW01000077.1	4817609	4818979	-	767	0.453716	-0.0114943	u	3
1379	TCONS_00031852	XLOC_011231	SDOW01000077.1	5482537	5487247	-	2102	0.47764	0.0159363	u	2
1380	TCONS_00031853	XLOC_011231	SDOW01000077.1	5482537	5487247	-	2751	0.536896	0.0182803	u	6
1381	TCONS_00031854	XLOC_011231	SDOW01000077.1	5482537	5487247	-	922	0.603037	0.0251799	u	3
1382	TCONS_00032003	XLOC_011295	SDOW01000077.1	3004548	3008972	.	249	0.409639	-0.372549	u	1
1383	TCONS_00032007	XLOC_011299	SDOW01000077.1	6520164	6520902	.	738	0.46748	0.084058	u	1
1384	TCONS_00032009	XLOC_011301	SDOW01000077.1	7423947	7424529	.	582	0.524055	0.213115	u	1
1385	TCONS_00032010	XLOC_011302	SDOW01000077.1	8251120	8251742	.	622	0.491961	0.117647	u	1
1386	TCONS_00032118	XLOC_011346	SDOW01000078.1	4377263	4377799	+	357	0.411765	0.156463	u	2
1387	TCONS_00032158	XLOC_011361	SDOW01000078.1	5153317	5156794	+	622	0.538585	0.0567164	u	2
1388	TCONS_00032160	XLOC_011361	SDOW01000078.1	5153317	5156794	+	325	0.412308	0.119403	u	1
1389	TCONS_00032166	XLOC_011364	SDOW01000078.1	5270359	5270969	+	427	0.4637	-0.0707071	u	2
1390	TCONS_00032255	XLOC_011398	SDOW01000078.1	3963233	3963545	-	207	0.507246	-0.0285714	u	2
1391	TCONS_00032258	XLOC_011401	SDOW01000078.1	4143245	4144074	-	641	0.405616	0.0769231	u	3
1392	TCONS_00032279	XLOC_011409	SDOW01000078.1	5172168	5173005	-	482	0.437759	-0.137441	u	2
1393	TCONS_00032322	XLOC_011432	SDOW01000078.1	2725320	2726165	.	845	0.363314	0.0553746	u	1
1394	TCONS_00032323	XLOC_011433	SDOW01000078.1	2727594	2728091	.	497	0.376258	0.144385	u	1
1395	TCONS_00032325	XLOC_011435	SDOW01000078.1	5204668	5205225	.	557	0.526032	0.0443686	u	1
1396	TCONS_00032326	XLOC_011436	SDOW01000078.1	5205310	5205754	.	444	0.43018	0.0575916	u	1
1397	TCONS_00032342	XLOC_011441	SDOW01000079.1	450617	453768	+	481	0.505198	0.0288066	j	3
1398	TCONS_00032408	XLOC_011472	SDOW01000079.1	3657511	3660204	+	1249	0.493195	0.00649351	x	2
1399	TCONS_00032417	XLOC_011478	SDOW01000079.1	4368872	4373697	+	4137	0.437757	-0.000552181	u	2
1400	TCONS_00032477	XLOC_011493	SDOW01000079.1	6474275	6478987	+	1021	0.505387	-0.0542636	u	5
1401	TCONS_00032479	XLOC_011493	SDOW01000079.1	6474275	6478987	+	1181	0.348857	0.0873786	u	1
1402	TCONS_00032480	XLOC_011494	SDOW01000079.1	6540861	6542533	+	1294	0.602009	0.0526316	x	3
1403	TCONS_00032481	XLOC_011494	SDOW01000079.1	6540861	6542533	+	1198	0.586811	0.0725462	x	3
1404	TCONS_00032489	XLOC_011496	SDOW01000079.1	7010980	7020824	+	658	0.483283	-0.0314465	u	3
1405	TCONS_00032503	XLOC_011500	SDOW01000079.1	7206646	7208341	+	1695	0.435398	0.100271	u	1
1406	TCONS_00032504	XLOC_011500	SDOW01000079.1	7206646	7208341	+	1293	0.468677	0.122112	u	2
1407	TCONS_00032528	XLOC_011509	SDOW01000079.1	948014	952554	-	2662	0.421488	-0.0106952	u	5
1408	TCONS_00032529	XLOC_011509	SDOW01000079.1	948014	952554	-	2688	0.421503	-0.00441306	u	5
1409	TCONS_00032530	XLOC_011509	SDOW01000079.1	948014	952554	-	1001	0.482517	-0.0227743	u	5
1410	TCONS_00032531	XLOC_011509	SDOW01000079.1	948014	952554	-	1098	0.489071	-0.0130354	u	6
1411	TCONS_00032532	XLOC_011509	SDOW01000079.1	948014	952554	-	1131	0.488948	0.00180832	u	6
1412	TCONS_00032533	XLOC_011509	SDOW01000079.1	948014	952554	-	1027	0.481013	-0.00809717	u	5
1413	TCONS_00032534	XLOC_011509	SDOW01000079.1	948014	952554	-	1124	0.487544	0	u	6
1414	TCONS_00032535	XLOC_011509	SDOW01000079.1	948014	952554	-	1107	0.490515	-0.0128913	u	6
1415	TCONS_00032542	XLOC_011514	SDOW01000079.1	1419141	1420654	-	1414	0.430693	-0.0246305	u	2
1416	TCONS_00032543	XLOC_011514	SDOW01000079.1	1419141	1420654	-	1033	0.455954	-0.0912951	u	3
1417	TCONS_00032609	XLOC_011537	SDOW01000079.1	3980959	3987669	-	5047	0.425996	0.00186047	j	5
1418	TCONS_00032625	XLOC_011541	SDOW01000079.1	4368872	4373697	-	3396	0.46437	-0.038681	u	5
1419	TCONS_00032628	XLOC_011541	SDOW01000079.1	4368872	4373697	-	2881	0.490108	-0.0410765	u	5
1420	TCONS_00032629	XLOC_011541	SDOW01000079.1	4368872	4373697	-	2490	0.51245	-0.0658307	u	6
1421	TCONS_00032630	XLOC_011541	SDOW01000079.1	4368872	4373697	-	3057	0.469742	-0.0445682	u	5
1422	TCONS_00032634	XLOC_011541	SDOW01000079.1	4368872	4373697	-	3277	0.46628	-0.039267	u	5
1423	TCONS_00032635	XLOC_011541	SDOW01000079.1	4368872	4373697	-	3097	0.456571	-0.0367751	u	4
1424	TCONS_00032636	XLOC_011541	SDOW01000079.1	4368872	4373697	-	3102	0.483237	-0.0753836	u	5
1425	TCONS_00032638	XLOC_011541	SDOW01000079.1	4368872	4373697	-	3202	0.487196	-0.075641	u	5
1426	TCONS_00032639	XLOC_011541	SDOW01000079.1	4368872	4373697	-	3087	0.482345	-0.0611148	u	7
1427	TCONS_00032645	XLOC_011541	SDOW01000079.1	4368872	4373697	-	3953	0.458386	-0.0463576	u	5
1428	TCONS_00032727	XLOC_011567	SDOW01000079.1	712131	713193	.	1062	0.629944	0.318386	u	1
1429	TCONS_00032728	XLOC_011568	SDOW01000079.1	721568	722202	.	634	0.678233	-0.0930233	u	1
1430	TCONS_00032730	XLOC_011570	SDOW01000079.1	1914042	1914617	.	575	0.462609	0.037594	u	1
1431	TCONS_00032731	XLOC_011571	SDOW01000079.1	1914739	1915313	.	574	0.440767	0.13834	u	1
1432	TCONS_00032732	XLOC_011572	SDOW01000079.1	4376333	4377072	.	739	0.346414	-0.0703125	u	1
1433	TCONS_00032733	XLOC_011573	SDOW01000079.1	7204079	7205179	.	1100	0.509091	-0.0535714	u	1
1434	TCONS_00032766	XLOC_011578	SDOW01000080.1	783482	787435	+	659	0.493171	-0.156923	u	3
1435	TCONS_00032767	XLOC_011578	SDOW01000080.1	783482	787435	+	2187	0.450846	0.0223124	u	3
1436	TCONS_00032768	XLOC_011578	SDOW01000080.1	783482	787435	+	1144	0.47028	-0.126394	u	3
1437	TCONS_00032770	XLOC_011578	SDOW01000080.1	783482	787435	+	3747	0.461436	-0.00867553	u	3
1438	TCONS_00032842	XLOC_011609	SDOW01000080.1	3158605	3163162	-	908	0.492291	0.0514541	u	3
1439	TCONS_00032879	XLOC_011625	SDOW01000080.1	2025428	2025853	.	425	0.684706	-0.223368	u	1
1440	TCONS_00032881	XLOC_011627	SDOW01000081.1	241362	242749	+	1170	0.605128	-0.0141243	o	3
1441	TCONS_00032883	XLOC_011628	SDOW01000081.1	317403	319743	+	597	0.474037	0.144876	u	4
1442	TCONS_00032988	XLOC_011667	SDOW01000081.1	1823247	1823612	.	365	0.454795	0.0240964	u	1
1443	TCONS_00033061	XLOC_011678	SDOW01000082.1	2809705	2814651	+	4273	0.405102	0.073368	j	4
1444	TCONS_00033071	XLOC_011678	SDOW01000082.1	2809705	2814651	+	3811	0.415639	0.0782828	j	7
1445	TCONS_00033086	XLOC_011678	SDOW01000082.1	2809705	2814651	+	4838	0.400579	0.0722394	j	2
1446	TCONS_00033100	XLOC_011681	SDOW01000082.1	3177619	3180991	+	992	0.553427	-0.0637523	o	2
1447	TCONS_00033177	XLOC_011714	SDOW01000082.1	1156326	1157939	-	651	0.639017	-0.201923	u	2
1448	TCONS_00033178	XLOC_011714	SDOW01000082.1	1156326	1157939	-	517	0.618956	-0.2375	u	2
1449	TCONS_00033190	XLOC_011720	SDOW01000082.1	2196963	2197920	-	887	0.535513	0.162105	u	2
1450	TCONS_00033207	XLOC_011727	SDOW01000082.1	2814715	2816029	-	1220	0.589344	0.0431154	u	2
1451	TCONS_00033214	XLOC_011730	SDOW01000082.1	3177619	3180991	-	911	0.601537	0.0839416	x	3
1452	TCONS_00033215	XLOC_011730	SDOW01000082.1	3177619	3180991	-	1144	0.550699	0.0730159	x	2
1453	TCONS_00033228	XLOC_011738	SDOW01000082.1	3844111	3845487	-	1254	0.577352	0.11326	u	2
1454	TCONS_00033246	XLOC_011745	SDOW01000082.1	5049073	5050475	-	327	0.571865	-0.294118	u	2
1455	TCONS_00033293	XLOC_011754	SDOW01000082.1	7401487	7406487	-	900	0.501111	-0.0199557	u	5
1456	TCONS_00033294	XLOC_011754	SDOW01000082.1	7401487	7406487	-	1825	0.443836	-0.00987654	u	4
1457	TCONS_00033297	XLOC_011754	SDOW01000082.1	7401487	7406487	-	1797	0.440178	-0.0164349	u	4
1458	TCONS_00033298	XLOC_011754	SDOW01000082.1	7401487	7406487	-	1248	0.503205	-0.0318471	u	5
1459	TCONS_00033299	XLOC_011754	SDOW01000082.1	7401487	7406487	-	1217	0.499589	-0.0394737	u	5
1460	TCONS_00033308	XLOC_011759	SDOW01000082.1	8258982	8269150	-	1218	0.423645	0.0775194	u	2
1461	TCONS_00033346	XLOC_011769	SDOW01000082.1	651694	654546	.	2852	0.459327	0.0549618	u	1
1462	TCONS_00033349	XLOC_011772	SDOW01000082.1	1438601	1439090	.	489	0.470348	0.295652	u	1
1463	TCONS_00033350	XLOC_011773	SDOW01000082.1	1460501	1461387	.	886	0.58465	-0.189189	u	1
1464	TCONS_00033351	XLOC_011774	SDOW01000082.1	1461467	1461848	.	381	0.509186	-0.175258	u	1
1465	TCONS_00033352	XLOC_011775	SDOW01000082.1	2288719	2289230	.	511	0.383562	-0.153061	u	1
1466	TCONS_00033354	XLOC_011777	SDOW01000082.1	5265705	5266191	.	486	0.617284	-0.0133333	u	1
1467	TCONS_00033385	XLOC_011786	SDOW01000083.1	1380768	1388589	+	841	0.588585	-0.0989899	u	1
1468	TCONS_00033389	XLOC_011788	SDOW01000083.1	1631300	1634724	+	3333	0.433243	-0.0221607	j	2
1469	TCONS_00033529	XLOC_011835	SDOW01000083.1	5182903	5188186	+	5110	0.401957	0.0389484	u	2
1470	TCONS_00033530	XLOC_011835	SDOW01000083.1	5182903	5188186	+	5056	0.40269	0.0412574	u	2
1471	TCONS_00033531	XLOC_011835	SDOW01000083.1	5182903	5188186	+	4960	0.402218	0.037594	u	2
1472	TCONS_00033532	XLOC_011835	SDOW01000083.1	5182903	5188186	+	2867	0.438089	0.0286624	u	3
1473	TCONS_00033533	XLOC_011835	SDOW01000083.1	5182903	5188186	+	1905	0.430446	0.0512195	u	3
1474	TCONS_00033534	XLOC_011835	SDOW01000083.1	5182903	5188186	+	4388	0.412944	0.0198676	u	2
1475	TCONS_00033535	XLOC_011835	SDOW01000083.1	5182903	5188186	+	4775	0.404188	0.0476684	u	2
1476	TCONS_00033536	XLOC_011835	SDOW01000083.1	5182903	5188186	+	3336	0.430456	0.0153203	u	2
1477	TCONS_00033538	XLOC_011835	SDOW01000083.1	5182903	5188186	+	2417	0.424493	0.0272904	u	3
1478	TCONS_00033564	XLOC_011846	SDOW01000083.1	6036780	6037981	+	431	0.450116	-0.0618557	u	2
1479	TCONS_00033648	XLOC_011872	SDOW01000083.1	2027139	2030318	-	2604	0.382873	0.0330993	j	2
1480	TCONS_00033651	XLOC_011872	SDOW01000083.1	2027139	2030318	-	811	0.499383	0.0222222	j	4
1481	TCONS_00033732	XLOC_011896	SDOW01000083.1	3978344	3983464	-	297	0.417508	0.145161	u	2
1482	TCONS_00033767	XLOC_011913	SDOW01000083.1	4702297	4704501	-	371	0.45283	0.154762	u	2
1483	TCONS_00033822	XLOC_011932	SDOW01000083.1	2530419	2531068	.	649	0.642527	-0.0647482	u	1
1484	TCONS_00033823	XLOC_011933	SDOW01000083.1	2818271	2826411	.	367	0.52861	-0.123711	u	1
1485	TCONS_00033825	XLOC_011935	SDOW01000083.1	4122156	4122458	.	302	0.533113	-0.10559	u	1
1486	TCONS_00033826	XLOC_011936	SDOW01000083.1	4350386	4350729	.	343	0.626822	0.302326	u	1
1487	TCONS_00033827	XLOC_011937	SDOW01000083.1	4402426	4403180	.	754	0.481432	0.0578512	u	1
1488	TCONS_00033830	XLOC_011940	SDOW01000083.1	4711457	4711983	.	526	0.444867	-0.0769231	u	1
1489	TCONS_00033831	XLOC_011941	SDOW01000083.1	6509223	6509776	.	553	0.332731	-0.0652174	u	1
1490	TCONS_00033832	XLOC_011942	SDOW01000083.1	6512070	6512869	.	799	0.55194	-0.0521542	u	1
1491	TCONS_00033866	XLOC_011953	SDOW01000084.1	1740353	1743999	+	2814	0.442431	0.0345382	j	3
1492	TCONS_00033964	XLOC_011986	SDOW01000084.1	1207866	1209691	-	1024	0.466797	-0.0292887	u	3
1493	TCONS_00033965	XLOC_011986	SDOW01000084.1	1207866	1209691	-	946	0.453488	0.034965	u	3
1494	TCONS_00033967	XLOC_011986	SDOW01000084.1	1207866	1209691	-	1045	0.465072	-0.0246914	u	3
1495	TCONS_00033969	XLOC_011986	SDOW01000084.1	1207866	1209691	-	1701	0.424456	-0.0221607	u	2
1496	TCONS_00033977	XLOC_011991	SDOW01000084.1	1548007	1562263	-	926	0.468683	0.193548	o	3
1497	TCONS_00034028	XLOC_011998	SDOW01000084.1	2607317	2607740	-	301	0.568106	0.0877193	u	2
1498	TCONS_00034032	XLOC_012001	SDOW01000084.1	3188032	3191190	-	2346	0.459506	0.198516	u	4
1499	TCONS_00034034	XLOC_012001	SDOW01000084.1	3188032	3191190	-	1281	0.503513	0.221705	u	5
1500	TCONS_00034056	XLOC_012015	SDOW01000084.1	1326915	1328623	.	1708	0.435012	0.138627	u	1
1501	TCONS_00034057	XLOC_012016	SDOW01000084.1	2608180	2608527	.	347	0.694524	0.00414938	u	1
1502	TCONS_00034087	XLOC_012032	SDOW01000085.1	1936867	1940125	+	2961	0.482607	0.0188943	j	2
1503	TCONS_00034151	XLOC_012052	SDOW01000085.1	4918790	4921222	+	674	0.498516	-0.0952381	u	3
1504	TCONS_00034240	XLOC_012090	SDOW01000085.1	8752571	8756358	+	1440	0.493056	0.0619718	u	8
1505	TCONS_00034242	XLOC_012090	SDOW01000085.1	8752571	8756358	+	1486	0.47039	0.0586552	u	6
1506	TCONS_00034244	XLOC_012090	SDOW01000085.1	8752571	8756358	+	1244	0.492765	0.0636215	u	7
1507	TCONS_00034249	XLOC_012090	SDOW01000085.1	8752571	8756358	+	1667	0.444511	0.0985155	u	4
1508	TCONS_00034250	XLOC_012090	SDOW01000085.1	8752571	8756358	+	1507	0.4572	0.111756	u	6
1509	TCONS_00034251	XLOC_012090	SDOW01000085.1	8752571	8756358	+	1003	0.455633	0.150985	u	6
1510	TCONS_00034253	XLOC_012090	SDOW01000085.1	8752571	8756358	+	983	0.4588	0.144124	u	6
1511	TCONS_00034267	XLOC_012097	SDOW01000085.1	9504174	9506373	+	910	0.486813	0.10158	j	4
1512	TCONS_00034268	XLOC_012097	SDOW01000085.1	9504174	9506373	+	922	0.480477	0.0970655	j	4
1513	TCONS_00034314	XLOC_012124	SDOW01000085.1	3606255	3611207	-	2050	0.469268	-0.00623701	u	6
1514	TCONS_00034317	XLOC_012124	SDOW01000085.1	3606255	3611207	-	2497	0.453344	-0.00706714	u	5
1515	TCONS_00034318	XLOC_012124	SDOW01000085.1	3606255	3611207	-	3069	0.430433	-0.00832703	u	4
1516	TCONS_00034319	XLOC_012124	SDOW01000085.1	3606255	3611207	-	2622	0.438978	-0.00781929	u	5
1517	TCONS_00034320	XLOC_012124	SDOW01000085.1	3606255	3611207	-	2471	0.452044	-0.0134288	u	5
1518	TCONS_00034321	XLOC_012124	SDOW01000085.1	3606255	3611207	-	2058	0.460155	0.00739176	u	6
1519	TCONS_00034322	XLOC_012124	SDOW01000085.1	3606255	3611207	-	2021	0.459673	-0.00107643	u	6
1520	TCONS_00034323	XLOC_012124	SDOW01000085.1	3606255	3611207	-	2024	0.467885	-0.0137276	u	6
1521	TCONS_00034326	XLOC_012124	SDOW01000085.1	3606255	3611207	-	1436	0.510446	-0.00682128	u	7
1522	TCONS_00034328	XLOC_012124	SDOW01000085.1	3606255	3611207	-	1475	0.511864	0.0119205	u	7
1523	TCONS_00034329	XLOC_012124	SDOW01000085.1	3606255	3611207	-	1900	0.480526	0.00985761	u	6
1524	TCONS_00034330	XLOC_012124	SDOW01000085.1	3606255	3611207	-	1929	0.481597	0.0182992	u	6
1525	TCONS_00034373	XLOC_012128	SDOW01000085.1	4140532	4146047	-	539	0.575139	-0.0129032	u	4
1526	TCONS_00034411	XLOC_012149	SDOW01000085.1	6366445	6370979	-	796	0.575377	-0.10917	x	5
1527	TCONS_00034418	XLOC_012152	SDOW01000085.1	6832065	6832481	-	244	0.495902	0.00826446	u	2
1528	TCONS_00034440	XLOC_012164	SDOW01000085.1	7537499	7539355	-	921	0.517915	-0.00209644	u	3
1529	TCONS_00034514	XLOC_012194	SDOW01000085.1	2254928	2255589	.	661	0.567322	0.232	u	1
1530	TCONS_00034515	XLOC_012195	SDOW01000085.1	3726377	3727006	.	629	0.54372	-0.0233918	u	1
1531	TCONS_00034516	XLOC_012196	SDOW01000085.1	3738458	3739049	.	591	0.715736	0.229314	u	1
1532	TCONS_00034517	XLOC_012197	SDOW01000085.1	4946133	4946603	.	470	0.470213	0.0316742	u	1
1533	TCONS_00034520	XLOC_012200	SDOW01000085.1	5970237	5971051	.	814	0.642506	0.296367	u	1
1534	TCONS_00034645	XLOC_012246	SDOW01000086.1	2931572	2933622	+	791	0.553729	-0.0958904	u	1
1535	TCONS_00034652	XLOC_012250	SDOW01000086.1	4661672	4664369	+	768	0.532552	-0.149144	u	2
1536	TCONS_00034653	XLOC_012250	SDOW01000086.1	4661672	4664369	+	426	0.5	-0.0234742	u	2
1537	TCONS_00034685	XLOC_012264	SDOW01000086.1	627835	630032	-	1587	0.432892	-0.0363901	u	2
1538	TCONS_00034821	XLOC_012306	SDOW01000086.1	853089	855705	.	365	0.372603	0.102941	u	1
1539	TCONS_00034822	XLOC_012307	SDOW01000086.1	1697641	1698105	.	464	0.62931	-0.0890411	u	1
1540	TCONS_00034824	XLOC_012309	SDOW01000086.1	2930567	2931031	.	464	0.543103	-0.015873	u	1
1541	TCONS_00034825	XLOC_012310	SDOW01000086.1	3881368	3882140	.	772	0.5	-0.196891	u	1
1542	TCONS_00034874	XLOC_012347	SDOW01000087.1	2194793	2196290	+	480	0.608333	0.0616438	x	2
1543	TCONS_00034895	XLOC_012358	SDOW01000087.1	3235358	3238341	+	682	0.451613	0.136364	u	2
1544	TCONS_00034975	XLOC_012375	SDOW01000087.1	5670721	5672544	+	491	0.541752	0.0601504	u	2
1545	TCONS_00035016	XLOC_012390	SDOW01000087.1	7375376	7376900	+	1283	0.469992	0.0414594	u	2
1546	TCONS_00035109	XLOC_012420	SDOW01000087.1	2381503	2386615	-	1044	0.442529	0.0779221	u	2
1547	TCONS_00035113	XLOC_012421	SDOW01000087.1	2395260	2398273	-	669	0.600897	-0.0547264	u	3
1548	TCONS_00035114	XLOC_012421	SDOW01000087.1	2395260	2398273	-	504	0.543651	-0.153285	u	1
1549	TCONS_00035146	XLOC_012430	SDOW01000087.1	3504975	3508506	-	3129	0.408437	0.0375587	u	1
1550	TCONS_00035147	XLOC_012430	SDOW01000087.1	3504975	3508506	-	2221	0.434489	-0.0341969	u	2
1551	TCONS_00035157	XLOC_012432	SDOW01000087.1	3533497	3536958	-	1762	0.508513	0.0200893	u	2
1552	TCONS_00035158	XLOC_012433	SDOW01000087.1	3542140	3547005	-	569	0.608084	-0.260116	u	3
1553	TCONS_00035159	XLOC_012433	SDOW01000087.1	3542140	3547005	-	796	0.577889	-0.152174	u	1
1554	TCONS_00035196	XLOC_012451	SDOW01000087.1	5670721	5672544	-	1583	0.477574	-0.005291	o	2
1555	TCONS_00035275	XLOC_012472	SDOW01000087.1	652886	654054	.	1168	0.46661	-0.111927	u	1
1556	TCONS_00035276	XLOC_012473	SDOW01000087.1	3542140	3547005	.	695	0.333813	-0.112069	u	1
1557	TCONS_00035278	XLOC_012475	SDOW01000087.1	3983243	3983516	.	273	0.395604	0	u	1
1558	TCONS_00035279	XLOC_012476	SDOW01000087.1	5318942	5319466	.	524	0.526718	0.0507246	u	1
1559	TCONS_00035280	XLOC_012477	SDOW01000087.1	5472754	5473683	.	929	0.461787	-0.002331	u	1
1560	TCONS_00035281	XLOC_012478	SDOW01000087.1	5476663	5477176	.	513	0.520468	-0.250936	u	1
1561	TCONS_00035282	XLOC_012479	SDOW01000087.1	6994745	6995118	.	373	0.49866	-0.139785	u	1
1562	TCONS_00035284	XLOC_012481	SDOW01000087.1	8258116	8258834	.	718	0.467967	0.0416667	u	1
1563	TCONS_00035425	XLOC_012511	SDOW01000088.1	4214738	4219049	+	518	0.432432	0.0267857	x	2
1564	TCONS_00035444	XLOC_012520	SDOW01000088.1	1007199	1010385	-	2856	0.481793	-0.0537791	u	4
1565	TCONS_00035448	XLOC_012523	SDOW01000088.1	1771034	1772341	-	508	0.647638	-0.197568	u	3
1566	TCONS_00035498	XLOC_012549	SDOW01000088.1	4492280	4494198	-	1294	0.501546	-0.0847458	u	2
1567	TCONS_00035499	XLOC_012549	SDOW01000088.1	4492280	4494198	-	1110	0.438739	0.00616016	u	1
1568	TCONS_00035511	XLOC_012552	SDOW01000088.1	490585	491696	.	1111	0.567057	-0.263492	u	1
1569	TCONS_00035512	XLOC_012553	SDOW01000088.1	1763510	1764039	.	529	0.353497	-0.0802139	u	1
1570	TCONS_00035513	XLOC_012554	SDOW01000088.1	4490745	4491590	.	845	0.504142	-0.13615	u	1
1571	TCONS_00035514	XLOC_012555	SDOW01000088.1	4491670	4492202	.	532	0.400376	0.211268	u	1
1572	TCONS_00035542	XLOC_012566	SDOW01000089.1	1293794	1297486	+	1154	0.496534	0.106457	x	3
1573	TCONS_00035651	XLOC_012605	SDOW01000089.1	5575536	5577891	+	1336	0.44012	0.0612245	u	1
1574	TCONS_00035656	XLOC_012606	SDOW01000089.1	5578098	5581483	+	621	0.483092	-0.0533333	u	2
1575	TCONS_00035669	XLOC_012610	SDOW01000089.1	6294050	6295891	+	943	0.496288	0.0512821	u	5
1576	TCONS_00035670	XLOC_012611	SDOW01000089.1	6445197	6448258	+	342	0.567251	-0.0618557	u	2
1577	TCONS_00035687	XLOC_012618	SDOW01000089.1	7717064	7722426	+	2992	0.400067	0.0125313	u	4
1578	TCONS_00035692	XLOC_012618	SDOW01000089.1	7717064	7722426	+	3043	0.400592	0.00902379	u	5
1579	TCONS_00035694	XLOC_012618	SDOW01000089.1	7717064	7722426	+	3007	0.399734	0.0116473	u	5
1580	TCONS_00035695	XLOC_012618	SDOW01000089.1	7717064	7722426	+	3050	0.400984	0.0122649	u	5
1581	TCONS_00035696	XLOC_012618	SDOW01000089.1	7717064	7722426	+	2032	0.424213	0.0116009	u	6
1582	TCONS_00035697	XLOC_012618	SDOW01000089.1	7717064	7722426	+	1296	0.472994	0.050571	u	6
1583	TCONS_00035698	XLOC_012618	SDOW01000089.1	7717064	7722426	+	694	0.485591	-0.0801187	u	2
1584	TCONS_00035758	XLOC_012645	SDOW01000089.1	348608	349378	-	653	0.503828	0.0638298	u	2
1585	TCONS_00035830	XLOC_012672	SDOW01000089.1	3053693	3054997	-	884	0.414027	0.20765	u	5
1586	TCONS_00035831	XLOC_012673	SDOW01000089.1	3055389	3055680	-	202	0.430693	0.0574713	u	2
1587	TCONS_00035867	XLOC_012695	SDOW01000089.1	4702438	4710039	-	811	0.552404	0.0491071	x	1
1588	TCONS_00035916	XLOC_012716	SDOW01000089.1	6279314	6285686	-	2738	0.417093	-0.0175131	j	5
1589	TCONS_00035919	XLOC_012716	SDOW01000089.1	6279314	6285686	-	1113	0.477987	-0.0075188	j	7
1590	TCONS_00035927	XLOC_012716	SDOW01000089.1	6279314	6285686	-	1973	0.438419	0.00115607	j	6
1591	TCONS_00035933	XLOC_012716	SDOW01000089.1	6279314	6285686	-	1252	0.480831	0.0531561	u	2
1592	TCONS_00035943	XLOC_012722	SDOW01000089.1	144593	145383	.	790	0.583544	-0.0672451	u	1
1593	TCONS_00035944	XLOC_012723	SDOW01000089.1	1710708	1711240	.	532	0.516917	-0.0181818	u	1
1594	TCONS_00035946	XLOC_012725	SDOW01000089.1	6224779	6225408	.	629	0.565978	-0.0280899	u	1
1595	TCONS_00035948	XLOC_012727	SDOW01000089.1	6297509	6297858	.	349	0.418338	-0.205479	u	1
1596	TCONS_00036006	XLOC_012748	SDOW01000090.1	2534498	2539626	+	459	0.686275	0.11746	u	2
1597	TCONS_00036105	XLOC_012794	SDOW01000090.1	3567479	3568567	-	919	0.550598	0.0434783	u	2
1598	TCONS_00036106	XLOC_012794	SDOW01000090.1	3567479	3568567	-	952	0.551471	0.0514286	u	2
1599	TCONS_00036129	XLOC_012802	SDOW01000090.1	578479	578863	.	384	0.583333	-0.00892857	u	1
1600	TCONS_00036130	XLOC_012803	SDOW01000090.1	2216450	2217059	.	609	0.410509	0.08	u	1
1601	TCONS_00036131	XLOC_012804	SDOW01000090.1	2724419	2724841	.	422	0.64455	0	u	1
1602	TCONS_00036133	XLOC_012806	SDOW01000090.1	4266291	4266829	.	538	0.574349	-0.0355987	u	1
1603	TCONS_00036254	XLOC_012832	SDOW01000091.1	2489138	2489828	+	436	0.527523	0.00869565	u	3
1604	TCONS_00036331	XLOC_012864	SDOW01000091.1	2831766	2835988	-	1096	0.494526	0.0405904	u	6
1605	TCONS_00036333	XLOC_012864	SDOW01000091.1	2831766	2835988	-	1191	0.492024	0.0375427	u	6
1606	TCONS_00036334	XLOC_012864	SDOW01000091.1	2831766	2835988	-	2204	0.436025	0.00728408	u	5
1607	TCONS_00036335	XLOC_012864	SDOW01000091.1	2831766	2835988	-	1193	0.492037	0.0357751	u	6
1608	TCONS_00036336	XLOC_012864	SDOW01000091.1	2831766	2835988	-	1991	0.441989	0.025	u	6
1609	TCONS_00036337	XLOC_012864	SDOW01000091.1	2831766	2835988	-	1243	0.491553	0.0245499	u	6
1610	TCONS_00036338	XLOC_012864	SDOW01000091.1	2831766	2835988	-	1247	0.49158	0.0277325	u	6
1611	TCONS_00036339	XLOC_012864	SDOW01000091.1	2831766	2835988	-	1274	0.489011	0.0208668	u	6
1612	TCONS_00036340	XLOC_012864	SDOW01000091.1	2831766	2835988	-	2247	0.436582	0.0030581	u	5
1613	TCONS_00036368	XLOC_012877	SDOW01000091.1	1037634	1038041	.	407	0.39312	-0.1625	u	1
1614	TCONS_00036369	XLOC_012878	SDOW01000091.1	1188316	1192414	.	544	0.446691	0.0452675	u	1
1615	TCONS_00036370	XLOC_012879	SDOW01000091.1	2831766	2835988	.	1135	0.334802	0.0157895	u	1
1616	TCONS_00036395	XLOC_012883	SDOW01000092.1	340671	343791	+	1362	0.538179	-0.053206	j	2
1617	TCONS_00036396	XLOC_012883	SDOW01000092.1	340671	343791	+	2227	0.500674	-0.0170404	j	4
1618	TCONS_00036398	XLOC_012883	SDOW01000092.1	340671	343791	+	1415	0.530742	-0.0306258	j	3
1619	TCONS_00036427	XLOC_012892	SDOW01000092.1	777949	783224	+	1608	0.481965	-0.0735484	o	3
1620	TCONS_00036495	XLOC_012923	SDOW01000092.1	1767722	1768262	+	448	0.671875	0.0431894	u	2
1621	TCONS_00036546	XLOC_012938	SDOW01000092.1	2913457	2917486	+	1497	0.505678	0.001321	u	6
1622	TCONS_00036547	XLOC_012938	SDOW01000092.1	2913457	2917486	+	1384	0.5	0.0317919	u	4
1623	TCONS_00036548	XLOC_012938	SDOW01000092.1	2913457	2917486	+	1323	0.50189	-0.00301205	u	6
1624	TCONS_00036549	XLOC_012938	SDOW01000092.1	2913457	2917486	+	1531	0.507511	0.00643501	u	6
1625	TCONS_00036550	XLOC_012938	SDOW01000092.1	2913457	2917486	+	1222	0.518822	0.0504732	u	6
1626	TCONS_00036551	XLOC_012938	SDOW01000092.1	2913457	2917486	+	1388	0.507925	-0.00992908	u	5
1627	TCONS_00036573	XLOC_012947	SDOW01000092.1	3347634	3355666	+	4961	0.43721	-0.032734	j	2
1628	TCONS_00036581	XLOC_012949	SDOW01000092.1	3735580	3736081	+	400	0.4075	0.00613497	u	2
1629	TCONS_00036608	XLOC_012955	SDOW01000092.1	4290332	4291710	+	444	0.599099	-0.0150376	o	2
1630	TCONS_00036611	XLOC_012957	SDOW01000092.1	4350620	4375819	+	1385	0.509025	-0.163121	x	2
1631	TCONS_00036662	XLOC_012974	SDOW01000092.1	5332407	5335335	+	735	0.466667	0.0787172	u	2
1632	TCONS_00036663	XLOC_012975	SDOW01000092.1	5438775	5441493	+	1168	0.666952	-0.029525	u	3
1633	TCONS_00036665	XLOC_012976	SDOW01000092.1	5441655	5442384	+	622	0.5209	0.111111	u	2
1634	TCONS_00036690	XLOC_012991	SDOW01000092.1	6243185	6245439	+	563	0.611012	0.284884	u	2
1635	TCONS_00036693	XLOC_012994	SDOW01000092.1	6972783	6974954	+	1971	0.508879	-0.170489	u	3
1636	TCONS_00036694	XLOC_012994	SDOW01000092.1	6972783	6974954	+	1835	0.506267	-0.143165	u	3
1637	TCONS_00036695	XLOC_012994	SDOW01000092.1	6972783	6974954	+	582	0.491409	-0.146853	u	2
1638	TCONS_00036717	XLOC_013000	SDOW01000092.1	7926509	7932023	+	650	0.432308	0.224199	u	3
1639	TCONS_00036732	XLOC_013008	SDOW01000092.1	529821	532702	-	2793	0.436448	0.0697293	j	2
1640	TCONS_00036735	XLOC_013009	SDOW01000092.1	534691	537718	-	1276	0.446708	0.0842105	j	6
1641	TCONS_00036739	XLOC_013009	SDOW01000092.1	534691	537718	-	888	0.503378	0.0201342	j	8
1642	TCONS_00036742	XLOC_013009	SDOW01000092.1	534691	537718	-	1747	0.44419	-0.0283505	j	5
1643	TCONS_00036744	XLOC_013009	SDOW01000092.1	534691	537718	-	2059	0.45119	0.0398278	j	5
1644	TCONS_00036745	XLOC_013009	SDOW01000092.1	534691	537718	-	1821	0.458539	0.0179641	j	5
1645	TCONS_00036748	XLOC_013009	SDOW01000092.1	534691	537718	-	1856	0.429418	0.0414053	j	6
1646	TCONS_00036761	XLOC_013015	SDOW01000092.1	861295	863647	-	858	0.465035	-0.0325815	u	2
1647	TCONS_00036764	XLOC_013015	SDOW01000092.1	861295	863647	-	1314	0.496195	-0.0460123	u	1
1648	TCONS_00036829	XLOC_013041	SDOW01000092.1	2885252	2894920	-	1123	0.429207	0.178423	x	3
1649	TCONS_00036830	XLOC_013041	SDOW01000092.1	2885252	2894920	-	1336	0.414671	0.216607	x	2
1650	TCONS_00036865	XLOC_013051	SDOW01000092.1	3385842	3398596	-	549	0.499089	0.138686	u	2
1651	TCONS_00036866	XLOC_013051	SDOW01000092.1	3385842	3398596	-	855	0.421053	0.127778	u	1
1652	TCONS_00036887	XLOC_013052	SDOW01000092.1	3401065	3403930	-	1206	0.393035	0.0506329	u	1
1653	TCONS_00036943	XLOC_013064	SDOW01000092.1	4350620	4375819	-	750	0.608	0.267544	u	2
1654	TCONS_00037074	XLOC_013083	SDOW01000092.1	5214380	5221916	-	2921	0.394043	0.0460469	j	4
1655	TCONS_00037170	XLOC_013107	SDOW01000092.1	6650237	6653157	-	562	0.574733	0.00309598	u	2
1656	TCONS_00037172	XLOC_013107	SDOW01000092.1	6650237	6653157	-	981	0.485219	0.0588235	u	2
1657	TCONS_00037173	XLOC_013107	SDOW01000092.1	6650237	6653157	-	978	0.485685	0.0568421	u	2
1658	TCONS_00037174	XLOC_013107	SDOW01000092.1	6650237	6653157	-	596	0.332215	0.10101	u	1
1659	TCONS_00037201	XLOC_013123	SDOW01000092.1	3103498	3104746	.	1248	0.443109	0.0271248	u	1
1660	TCONS_00037202	XLOC_013124	SDOW01000092.1	3385842	3398596	.	374	0.430481	-0.329193	u	1
1661	TCONS_00037203	XLOC_013125	SDOW01000092.1	3401065	3403930	.	222	0.364865	-0.185185	u	1
1662	TCONS_00037204	XLOC_013126	SDOW01000092.1	3422261	3423409	.	1148	0.383275	-0.159091	u	1
1663	TCONS_00037205	XLOC_013127	SDOW01000092.1	3424902	3425342	.	440	0.461364	0.123153	u	1
1664	TCONS_00037206	XLOC_013128	SDOW01000092.1	3933145	3933403	.	258	0.581395	0.04	u	1
1665	TCONS_00037207	XLOC_013129	SDOW01000092.1	4123641	4123868	.	227	0.506608	-0.0434783	u	1
1666	TCONS_00037208	XLOC_013130	SDOW01000092.1	4530965	4532188	.	1223	0.475061	-0.0154905	u	1
1667	TCONS_00037209	XLOC_013131	SDOW01000092.1	4901653	4904062	.	2409	0.487339	-0.011925	u	1
1668	TCONS_00037214	XLOC_013136	SDOW01000092.1	7896673	7901137	.	538	0.44052	0.0379747	u	1
1669	TCONS_00037215	XLOC_013137	SDOW01000092.1	7896673	7901137	.	342	0.400585	0.153285	u	1
1670	TCONS_00037216	XLOC_013138	SDOW01000092.1	7909331	7909968	.	637	0.398744	0.102362	u	1
1671	TCONS_00037218	XLOC_013140	SDOW01000092.1	7926125	7926407	.	282	0.72695	0.239024	u	1
1672	TCONS_00037219	XLOC_013141	SDOW01000092.1	8337740	8341911	.	545	0.348624	-0.0842105	u	1
1673	TCONS_00037276	XLOC_013154	SDOW01000093.1	1241164	1244519	+	3249	0.52293	-0.0818128	u	2
1674	TCONS_00037288	XLOC_013158	SDOW01000093.1	1492257	1500642	+	3801	0.403841	0.00456026	u	2
1675	TCONS_00037317	XLOC_013172	SDOW01000093.1	3693077	3703442	+	1665	0.384384	-0.1125	u	2
1676	TCONS_00037329	XLOC_013175	SDOW01000093.1	4700755	4701873	+	699	0.436338	0.0688525	u	2
1677	TCONS_00037333	XLOC_013179	SDOW01000093.1	230634	244412	-	1094	0.532907	-0.0566038	x	7
1678	TCONS_00037447	XLOC_013210	SDOW01000093.1	3693077	3703442	-	702	0.405983	0.101754	u	2
1679	TCONS_00037459	XLOC_013216	SDOW01000093.1	1919193	1919496	.	303	0.547855	-0.385542	u	1
1680	TCONS_00037460	XLOC_013217	SDOW01000093.1	3316361	3335632	.	319	0.583072	-0.225806	u	1
1681	TCONS_00037461	XLOC_013218	SDOW01000093.1	4304125	4304608	.	483	0.503106	0.168724	u	1
1682	TCONS_00037462	XLOC_013219	SDOW01000093.1	4589980	4590187	.	207	0.463768	0.0833333	u	1
1683	TCONS_00037463	XLOC_013220	SDOW01000093.1	4754232	4755323	.	1091	0.672777	-0.0108992	u	1
1684	TCONS_00037465	XLOC_013222	SDOW01000094.1	726570	728776	+	1977	0.509863	0.00992064	x	3
1685	TCONS_00037491	XLOC_013228	SDOW01000094.1	1528217	1529675	+	1143	0.417323	0.0272537	u	3
1686	TCONS_00037611	XLOC_013265	SDOW01000094.1	4686428	4687192	+	585	0.444444	-0.0230769	u	2
1687	TCONS_00037822	XLOC_013318	SDOW01000094.1	7276220	7277532	+	1076	0.497212	-0.13271	u	3
1688	TCONS_00037823	XLOC_013319	SDOW01000094.1	7295369	7296845	+	1150	0.453913	-0.0842912	u	2
1689	TCONS_00037824	XLOC_013319	SDOW01000094.1	7295369	7296845	+	542	0.501845	-0.102941	u	2
1690	TCONS_00037967	XLOC_013374	SDOW01000094.1	13642952	13643896	+	373	0.568365	-0.283019	u	2
1691	TCONS_00037968	XLOC_013374	SDOW01000094.1	13642952	13643896	+	530	0.541509	-0.254355	u	2
1692	TCONS_00037977	XLOC_013381	SDOW01000094.1	14940426	14941372	+	844	0.594787	-0.290837	u	2
1693	TCONS_00037978	XLOC_013381	SDOW01000094.1	14940426	14941372	+	867	0.594002	-0.293204	u	2
1694	TCONS_00037979	XLOC_013381	SDOW01000094.1	14940426	14941372	+	847	0.595041	-0.289683	u	2
1695	TCONS_00037980	XLOC_013381	SDOW01000094.1	14940426	14941372	+	848	0.595519	-0.287129	u	2
1696	TCONS_00038017	XLOC_013395	SDOW01000094.1	3722649	3727245	-	2186	0.406679	-0.0866142	u	3
1697	TCONS_00038068	XLOC_013414	SDOW01000094.1	4725094	4728139	-	358	0.653631	0.205128	o	3
1698	TCONS_00038118	XLOC_013438	SDOW01000094.1	6044568	6049227	-	1880	0.48617	0.0656455	x	7
1699	TCONS_00038119	XLOC_013438	SDOW01000094.1	6044568	6049227	-	1858	0.490312	0.0757409	x	7
1700	TCONS_00038121	XLOC_013438	SDOW01000094.1	6044568	6049227	-	2180	0.526147	0.0462075	x	7
1701	TCONS_00038122	XLOC_013438	SDOW01000094.1	6044568	6049227	-	2184	0.526099	0.0461271	x	7
1702	TCONS_00038123	XLOC_013438	SDOW01000094.1	6044568	6049227	-	2118	0.527384	0.042077	x	6
1703	TCONS_00038158	XLOC_013452	SDOW01000094.1	7295369	7296845	-	1378	0.460813	0.0929134	u	2
1704	TCONS_00038203	XLOC_013472	SDOW01000094.1	10678793	10680668	-	1240	0.41129	-0.0666667	u	2
1705	TCONS_00038249	XLOC_013489	SDOW01000094.1	11785660	11788556	-	1139	0.52151	0.023569	o	3
1706	TCONS_00038250	XLOC_013489	SDOW01000094.1	11785660	11788556	-	575	0.589565	0.00884956	o	2
1707	TCONS_00038251	XLOC_013489	SDOW01000094.1	11785660	11788556	-	1906	0.453305	0.0671296	o	2
1708	TCONS_00038252	XLOC_013489	SDOW01000094.1	11785660	11788556	-	810	0.579012	0.0490405	o	2
1709	TCONS_00038280	XLOC_013498	SDOW01000094.1	12386240	12390933	-	1699	0.418481	0.0323488	u	3
1710	TCONS_00038282	XLOC_013498	SDOW01000094.1	12386240	12390933	-	1703	0.418673	0.0350631	u	3
1711	TCONS_00038283	XLOC_013498	SDOW01000094.1	12386240	12390933	-	1438	0.433241	0.0304976	u	3
1712	TCONS_00038285	XLOC_013498	SDOW01000094.1	12386240	12390933	-	1446	0.505533	-0.0560875	u	6
1713	TCONS_00038287	XLOC_013498	SDOW01000094.1	12386240	12390933	-	1546	0.48577	-0.0439414	u	5
1714	TCONS_00038288	XLOC_013498	SDOW01000094.1	12386240	12390933	-	1450	0.505517	-0.053206	u	6
1715	TCONS_00038290	XLOC_013498	SDOW01000094.1	12386240	12390933	-	1223	0.500409	-0.00980392	u	2
1716	TCONS_00038315	XLOC_013511	SDOW01000094.1	15231404	15233178	-	1014	0.481262	-0.155738	u	3
1717	TCONS_00038316	XLOC_013511	SDOW01000094.1	15231404	15233178	-	1678	0.429678	-0.0984743	u	2
1718	TCONS_00038317	XLOC_013511	SDOW01000094.1	15231404	15233178	-	981	0.485219	-0.180672	u	2
1719	TCONS_00038318	XLOC_013511	SDOW01000094.1	15231404	15233178	-	1029	0.479106	-0.160243	u	3
1720	TCONS_00038322	XLOC_013515	SDOW01000094.1	1526357	1527036	.	679	0.474227	0.0559006	u	1
1721	TCONS_00038323	XLOC_013516	SDOW01000094.1	1527535	1527914	.	379	0.435356	0.272727	u	1
1722	TCONS_00038325	XLOC_013518	SDOW01000094.1	3292255	3292817	.	562	0.530249	-0.00671141	u	1
1723	TCONS_00038335	XLOC_013528	SDOW01000094.1	4655153	4655863	.	710	0.578873	0.0364963	u	1
1724	TCONS_00038336	XLOC_013529	SDOW01000094.1	4685039	4685367	.	328	0.512195	0.154762	u	1
1725	TCONS_00038337	XLOC_013530	SDOW01000094.1	4854960	4855441	.	481	0.513514	-0.190283	u	1
1726	TCONS_00038338	XLOC_013531	SDOW01000094.1	5338648	5338970	.	322	0.444099	-0.230769	u	1
1727	TCONS_00038339	XLOC_013532	SDOW01000094.1	5441576	5442304	.	728	0.517857	0.129973	u	1
1728	TCONS_00038340	XLOC_013533	SDOW01000094.1	5617606	5618345	.	739	0.488498	0.0581717	u	1
1729	TCONS_00038341	XLOC_013534	SDOW01000094.1	6082431	6082675	.	244	0.565574	-0.15942	u	1
1730	TCONS_00038342	XLOC_013535	SDOW01000094.1	6084961	6085473	.	512	0.464844	0.0336134	u	1
1731	TCONS_00038344	XLOC_013537	SDOW01000094.1	7344559	7344920	.	361	0.65374	-0.271186	u	1
1732	TCONS_00038345	XLOC_013538	SDOW01000094.1	9752316	9753014	.	698	0.436963	-0.127869	u	1
1733	TCONS_00038346	XLOC_013539	SDOW01000094.1	11193330	11193620	.	290	0.662069	-0.0520833	u	1
1734	TCONS_00038348	XLOC_013541	SDOW01000094.1	11294706	11295192	.	486	0.639918	-0.022508	u	1
1735	TCONS_00038349	XLOC_013542	SDOW01000094.1	11297946	11298182	.	236	0.368644	0.310345	u	1
1736	TCONS_00038360	XLOC_013545	SDOW01000095.1	879074	879993	+	828	0.52657	-0.0550459	u	2
1737	TCONS_00038361	XLOC_013546	SDOW01000095.1	880116	882194	+	1019	0.527969	-0.130112	u	3
1738	TCONS_00038362	XLOC_013546	SDOW01000095.1	880116	882194	+	1008	0.526786	-0.129943	u	3
1739	TCONS_00038363	XLOC_013546	SDOW01000095.1	880116	882194	+	830	0.486747	-0.0792079	u	2
1740	TCONS_00038395	XLOC_013560	SDOW01000095.1	1785197	1790188	+	1999	0.362181	-0.0552486	u	2
1741	TCONS_00038464	XLOC_013586	SDOW01000095.1	3176780	3178220	+	1357	0.441415	-0.00166945	u	2
1742	TCONS_00038465	XLOC_013586	SDOW01000095.1	3176780	3178220	+	1358	0.442563	-0.00166389	u	2
1743	TCONS_00038469	XLOC_013587	SDOW01000095.1	3183138	3185637	+	1272	0.490566	0.0192308	u	3
1744	TCONS_00038470	XLOC_013588	SDOW01000095.1	3252815	3254452	+	1176	0.445578	-0.0610687	u	2
1745	TCONS_00038471	XLOC_013589	SDOW01000095.1	3263611	3264820	+	1042	0.454894	-0.00421941	u	2
1746	TCONS_00038477	XLOC_013592	SDOW01000095.1	3381775	3383194	+	537	0.446927	-0.075	x	2
1747	TCONS_00038480	XLOC_013593	SDOW01000095.1	3389934	3394216	+	2660	0.354887	0.0614407	u	1
1748	TCONS_00038572	XLOC_013626	SDOW01000095.1	978374	982998	-	995	0.564824	-0.0640569	u	4
1749	TCONS_00038573	XLOC_013626	SDOW01000095.1	978374	982998	-	891	0.589226	-0.0704762	u	3
1750	TCONS_00038736	XLOC_013661	SDOW01000095.1	3313587	3314907	-	766	0.424282	-0.0338462	u	3
1751	TCONS_00038775	XLOC_013677	SDOW01000095.1	3817901	3822102	-	1624	0.475985	0.0504528	j	6
1752	TCONS_00038812	XLOC_013691	SDOW01000095.1	4112697	4115244	-	808	0.540842	0.107551	u	2
1753	TCONS_00038851	XLOC_013694	SDOW01000095.1	4408176	4409250	-	932	0.540773	-0.107143	u	2
1754	TCONS_00038852	XLOC_013694	SDOW01000095.1	4408176	4409250	-	985	0.548223	-0.122222	u	2
1755	TCONS_00038853	XLOC_013694	SDOW01000095.1	4408176	4409250	-	748	0.51738	-0.121447	u	2
1756	TCONS_00038869	XLOC_013704	SDOW01000095.1	1152274	1152708	.	434	0.559908	-0.168724	u	1
1757	TCONS_00038870	XLOC_013705	SDOW01000095.1	1465048	1465954	.	906	0.47351	0.0582751	u	1
1758	TCONS_00038871	XLOC_013706	SDOW01000095.1	1467781	1468517	.	736	0.456522	-0.0297619	u	1
1759	TCONS_00038872	XLOC_013707	SDOW01000095.1	1665949	1666292	.	343	0.364431	-0.088	u	1
1760	TCONS_00038873	XLOC_013708	SDOW01000095.1	1666410	1666647	.	237	0.405063	0.145833	u	1
1761	TCONS_00038875	XLOC_013710	SDOW01000095.1	2242697	2243225	.	528	0.501894	0.267925	u	1
1762	TCONS_00038876	XLOC_013711	SDOW01000095.1	3254742	3255367	.	625	0.4832	0.112583	u	1
1763	TCONS_00038877	XLOC_013712	SDOW01000095.1	3389934	3394216	.	303	0.339934	0.184466	u	1
1764	TCONS_00038889	XLOC_013720	SDOW01000096.1	1547196	1551239	+	1235	0.463968	-0.0331588	u	3
1765	TCONS_00038890	XLOC_013720	SDOW01000096.1	1547196	1551239	+	805	0.535404	-0.0301624	u	3
1766	TCONS_00038891	XLOC_013720	SDOW01000096.1	1547196	1551239	+	2366	0.446323	0.00568182	u	3
1767	TCONS_00038892	XLOC_013720	SDOW01000096.1	1547196	1551239	+	2371	0.446225	0.00567108	u	3
1768	TCONS_00038893	XLOC_013720	SDOW01000096.1	1547196	1551239	+	2670	0.430337	0.000870322	u	2
1769	TCONS_00038896	XLOC_013720	SDOW01000096.1	1547196	1551239	+	749	0.53004	0.02267	u	3
1770	TCONS_00038901	XLOC_013725	SDOW01000096.1	3034524	3037394	+	813	0.506765	0.126214	u	2
1771	TCONS_00038902	XLOC_013725	SDOW01000096.1	3034524	3037394	+	1241	0.542305	0.02526	u	2
1772	TCONS_00038903	XLOC_013725	SDOW01000096.1	3034524	3037394	+	2870	0.441463	-0.035517	u	1
1773	TCONS_00038991	XLOC_013755	SDOW01000096.1	5819515	5823199	-	2116	0.403592	0.0210773	j	5
1774	TCONS_00039003	XLOC_013756	SDOW01000096.1	1979174	1979886	.	712	0.59691	0.110588	u	1
1775	TCONS_00039004	XLOC_013757	SDOW01000096.1	2258043	2258390	.	347	0.432277	-0.186667	u	1
1776	TCONS_00039005	XLOC_013758	SDOW01000096.1	2684447	2684764	.	317	0.37224	0.0677966	u	1
1777	TCONS_00039006	XLOC_013759	SDOW01000096.1	2770279	2771042	.	763	0.625164	-0.140461	u	1
1778	TCONS_00039007	XLOC_013760	SDOW01000096.1	3047697	3048769	.	1072	0.351679	-0.167109	u	1
1779	TCONS_00039008	XLOC_013761	SDOW01000096.1	3049129	3049442	.	313	0.645367	0.277228	u	1
1780	TCONS_00039009	XLOC_013762	SDOW01000096.1	5564275	5564574	.	299	0.662207	0.20202	u	1
1781	TCONS_00039022	XLOC_013768	SDOW01000097.1	1827273	1828309	+	800	0.52375	-0.0405728	j	3
1782	TCONS_00039049	XLOC_013784	SDOW01000097.1	4553352	4556589	+	592	0.407095	-0.128631	u	2
1783	TCONS_00039050	XLOC_013784	SDOW01000097.1	4553352	4556589	+	759	0.405797	-0.0649351	u	2
1784	TCONS_00039131	XLOC_013813	SDOW01000097.1	4542256	4543747	-	813	0.421894	0.0553936	u	2
1785	TCONS_00039132	XLOC_013813	SDOW01000097.1	4542256	4543747	-	839	0.417163	0.0571429	u	2
1786	TCONS_00039133	XLOC_013813	SDOW01000097.1	4542256	4543747	-	1348	0.39911	0.0780669	u	2
1787	TCONS_00039146	XLOC_013823	SDOW01000097.1	4541450	4542044	.	594	0.590909	0.048433	u	1
1788	TCONS_00039147	XLOC_013824	SDOW01000097.1	4543798	4545215	.	1417	0.478476	0.0383481	u	1
1789	TCONS_00039150	XLOC_013827	SDOW01000097.1	4558699	4559420	.	721	0.656033	-0.0951374	u	1
1790	TCONS_00039152	XLOC_013829	SDOW01000097.1	4616325	4616761	.	436	0.548165	-0.154812	u	1
1791	TCONS_00039153	XLOC_013830	SDOW01000097.1	4982583	4983158	.	575	0.624348	-0.259053	u	1
1792	TCONS_00039154	XLOC_013831	SDOW01000097.1	4983222	4983732	.	510	0.478431	-0.139344	u	1
1793	TCONS_00039155	XLOC_013832	SDOW01000097.1	6042068	6042514	.	446	0.403587	0.166667	u	1
1794	TCONS_00039224	XLOC_013854	SDOW01000098.1	2872398	2882398	+	1418	0.43512	-0.0599676	x	2
1795	TCONS_00039227	XLOC_013856	SDOW01000098.1	3153923	3156447	+	276	0.431159	-0.092437	x	2
1796	TCONS_00039369	XLOC_013897	SDOW01000098.1	2190894	2194191	-	1638	0.465812	-0.0432503	j	3
1797	TCONS_00039370	XLOC_013897	SDOW01000098.1	2190894	2194191	-	1141	0.490798	-0.0214286	j	4
1798	TCONS_00039372	XLOC_013897	SDOW01000098.1	2190894	2194191	-	1553	0.469414	-0.0534979	j	3
1799	TCONS_00039384	XLOC_013903	SDOW01000098.1	2304070	2306378	-	767	0.483703	0.0188679	u	3
1800	TCONS_00039385	XLOC_013903	SDOW01000098.1	2304070	2306378	-	542	0.370849	0.0547264	u	1
1801	TCONS_00039386	XLOC_013903	SDOW01000098.1	2304070	2306378	-	708	0.44209	0.0415335	u	3
1802	TCONS_00039534	XLOC_013950	SDOW01000098.1	5896323	5896678	.	355	0.515493	-0.191257	u	1
1803	TCONS_00039535	XLOC_013951	SDOW01000098.1	5897162	5897492	.	330	0.493939	-0.0429448	u	1
1804	TCONS_00039536	XLOC_013952	SDOW01000098.1	5898295	5899171	.	876	0.560502	-0.201629	u	1
1805	TCONS_00039537	XLOC_013953	SDOW01000098.1	5900141	5900772	.	631	0.431062	-0.0147059	u	1
1806	TCONS_00039538	XLOC_013954	SDOW01000098.1	5973035	5973761	.	726	0.538567	-0.0485934	u	1
1807	TCONS_00039556	XLOC_013962	SDOW01000099.1	493016	493606	+	503	0.594433	0.0100334	u	2
1808	TCONS_00039573	XLOC_013975	SDOW01000099.1	3108234	3109796	+	1063	0.528692	-0.13879	u	5
1809	TCONS_00039574	XLOC_013975	SDOW01000099.1	3108234	3109796	+	1178	0.52292	-0.133117	u	4
1810	TCONS_00039575	XLOC_013975	SDOW01000099.1	3108234	3109796	+	1103	0.517679	-0.0788091	u	4
1811	TCONS_00039854	XLOC_014065	SDOW01000099.1	8944032	8945997	-	797	0.631117	-0.308151	u	2
1812	TCONS_00039860	XLOC_014070	SDOW01000099.1	2795470	2795720	.	250	0.468	-0.042735	u	1
1813	TCONS_00039861	XLOC_014071	SDOW01000099.1	3696194	3696988	.	794	0.551637	-0.246575	u	1
1814	TCONS_00039862	XLOC_014072	SDOW01000099.1	5091192	5091713	.	521	0.604607	0.301587	u	1
1815	TCONS_00039863	XLOC_014073	SDOW01000099.1	8595386	8595942	.	556	0.555755	0.0355987	u	1
1816	TCONS_00039872	XLOC_014075	SDOW01000100.1	154238	162172	+	955	0.412565	0.106599	u	4
1817	TCONS_00040110	XLOC_014130	SDOW01000100.1	2287382	2289329	.	1947	0.469954	0.0229508	u	1
1818	TCONS_00040111	XLOC_014131	SDOW01000100.1	2598111	2598764	.	653	0.555896	-0.157025	u	1
1819	TCONS_00040122	XLOC_014138	SDOW01000101.1	1727151	1731763	+	1483	0.480108	0.0589888	u	4
1820	TCONS_00040306	XLOC_014210	SDOW01000101.1	649567	650389	.	822	0.591241	-0.197531	u	1
1821	TCONS_00040308	XLOC_014212	SDOW01000101.1	1727151	1731763	.	483	0.434783	0.0190476	u	1
1822	TCONS_00040309	XLOC_014213	SDOW01000101.1	2273797	2274157	.	360	0.322222	0	u	1
1823	TCONS_00040310	XLOC_014214	SDOW01000101.1	2758561	2758837	.	276	0.40942	-0.433628	u	1
1824	TCONS_00040311	XLOC_014215	SDOW01000101.1	2786076	2787274	.	1198	0.323038	0.00775194	u	1
1825	TCONS_00040312	XLOC_014216	SDOW01000101.1	4167820	4168598	.	778	0.713368	0.135135	u	1
1826	TCONS_00040346	XLOC_014231	SDOW01000102.1	2779124	2781625	+	1386	0.47619	0.0939394	u	2
1827	TCONS_00040368	XLOC_014238	SDOW01000102.1	3765716	3767066	+	911	0.467618	-0.0938967	u	2
1828	TCONS_00040382	XLOC_014247	SDOW01000102.1	214611	215254	-	555	0.455856	0.130435	u	2
1829	TCONS_00040433	XLOC_014262	SDOW01000102.1	3047963	3048833	-	342	0.535088	-0.103825	u	2
1830	TCONS_00040544	XLOC_014303	SDOW01000103.1	4014633	4015687	-	392	0.52551	0.0194175	u	2
1831	TCONS_00040548	XLOC_014306	SDOW01000103.1	2378381	2379186	.	805	0.499379	-0.104478	u	1
1832	TCONS_00040549	XLOC_014307	SDOW01000103.1	4493722	4494627	.	905	0.487293	0.147392	u	1
1833	TCONS_00040555	XLOC_014311	SDOW01000104.1	672970	673818	+	657	0.549467	0.130194	u	2
1834	TCONS_00040672	XLOC_014345	SDOW01000104.1	4221200	4223879	+	1010	0.430693	0.108046	u	4
1835	TCONS_00040765	XLOC_014373	SDOW01000104.1	1362986	1365508	-	562	0.414591	0.175966	u	4
1836	TCONS_00040866	XLOC_014410	SDOW01000104.1	1384508	1385340	.	832	0.52524	0.0755149	u	1
1837	TCONS_00040871	XLOC_014412	SDOW01000105.1	27623	34068	+	722	0.325485	-0.0212766	u	1
1838	TCONS_00040875	XLOC_014414	SDOW01000105.1	50777	51189	+	309	0.482201	0.00671141	u	2
1839	TCONS_00040911	XLOC_014429	SDOW01000105.1	831006	833739	+	727	0.390646	0.169014	u	3
1840	TCONS_00040940	XLOC_014443	SDOW01000105.1	1403969	1413167	+	681	0.471366	0.0155763	x	2
1841	TCONS_00041120	XLOC_014528	SDOW01000105.1	2098	4312	-	1232	0.592532	0.00821918	u	2
1842	TCONS_00041121	XLOC_014529	SDOW01000105.1	25159	27284	-	1144	0.605769	0.021645	u	2
1843	TCONS_00041122	XLOC_014530	SDOW01000105.1	95276	96505	-	608	0.664474	-0.262376	u	2
1844	TCONS_00041158	XLOC_014543	SDOW01000105.1	861490	862018	-	417	0.446043	0.268817	u	2
1845	TCONS_00041178	XLOC_014556	SDOW01000105.1	1276358	1277444	-	821	0.546894	0.0334076	u	3
1846	TCONS_00041448	XLOC_014636	SDOW01000105.1	6785640	6787017	-	1164	0.560997	-0.200613	u	3
1847	TCONS_00041450	XLOC_014636	SDOW01000105.1	6785640	6787017	-	1219	0.555373	-0.193501	u	3
1848	TCONS_00041459	XLOC_014640	SDOW01000105.1	4588	10526	.	2020	0.388119	0.0867347	u	1
1849	TCONS_00041460	XLOC_014641	SDOW01000105.1	34577	35175	.	598	0.481605	0.0833333	u	1
1850	TCONS_00041461	XLOC_014642	SDOW01000105.1	94064	94920	.	856	0.404206	-0.144509	u	1
1851	TCONS_00041463	XLOC_014644	SDOW01000105.1	2310894	2311363	.	469	0.47548	0.0762332	u	1
1852	TCONS_00041464	XLOC_014645	SDOW01000105.1	3152009	3152368	.	359	0.392758	-0.106383	u	1
1853	TCONS_00041466	XLOC_014647	SDOW01000105.1	3155747	3156021	.	274	0.642336	0.125	u	1
1854	TCONS_00041468	XLOC_014649	SDOW01000105.1	3816111	3816858	.	747	0.605087	-0.0840708	u	1
1855	TCONS_00041469	XLOC_014650	SDOW01000105.1	6784809	6785223	.	414	0.635266	-0.026616	u	1
1856	TCONS_00041470	XLOC_014651	SDOW01000105.1	7185880	7186779	.	899	0.612903	0.0598911	u	1
1857	TCONS_00041527	XLOC_014669	SDOW01000106.1	1977976	1984868	+	1632	0.461397	-0.104914	u	2
1858	TCONS_00041529	XLOC_014669	SDOW01000106.1	1977976	1984868	+	1194	0.475712	-0.130282	u	3
1859	TCONS_00041628	XLOC_014707	SDOW01000106.1	1124342	1128955	-	972	0.502058	0.0532787	u	4
1860	TCONS_00041675	XLOC_014724	SDOW01000106.1	1882939	1883481	.	542	0.53321	0.0657439	u	1
1861	TCONS_00041676	XLOC_014725	SDOW01000106.1	1977976	1984868	.	269	0.342007	0.173913	u	1
1862	TCONS_00041678	XLOC_014726	SDOW01000107.1	40224	46450	+	1165	0.51073	0.0991597	u	4
1863	TCONS_00041679	XLOC_014726	SDOW01000107.1	40224	46450	+	1244	0.495177	0.0876623	u	7
1864	TCONS_00041732	XLOC_014745	SDOW01000107.1	3569394	3571884	+	642	0.562305	-0.113573	u	2
1865	TCONS_00041733	XLOC_014745	SDOW01000107.1	3569394	3571884	+	1301	0.53113	-0.0361795	u	5
1866	TCONS_00041734	XLOC_014745	SDOW01000107.1	3569394	3571884	+	731	0.54446	-0.0653266	u	5
1867	TCONS_00041772	XLOC_014762	SDOW01000107.1	915592	923960	-	688	0.578488	-0.0251256	u	3
1868	TCONS_00041776	XLOC_014762	SDOW01000107.1	915592	923960	-	686	0.565598	-0.00515464	u	3
1869	TCONS_00041779	XLOC_014762	SDOW01000107.1	915592	923960	-	1348	0.461424	-0.0675241	u	2
1870	TCONS_00041822	XLOC_014778	SDOW01000107.1	3655043	3659562	-	3438	0.400233	0.0101744	u	4
1871	TCONS_00041823	XLOC_014778	SDOW01000107.1	3655043	3659562	-	2059	0.441962	-0.0527473	u	3
1872	TCONS_00041824	XLOC_014778	SDOW01000107.1	3655043	3659562	-	3046	0.411687	-0.0175439	u	4
1873	TCONS_00041825	XLOC_014778	SDOW01000107.1	3655043	3659562	-	2448	0.437908	-0.0391791	u	4
1874	TCONS_00041826	XLOC_014778	SDOW01000107.1	3655043	3659562	-	2409	0.436696	-0.0342205	u	4
1875	TCONS_00041827	XLOC_014778	SDOW01000107.1	3655043	3659562	-	3651	0.398795	-0.0192308	u	3
1876	TCONS_00041829	XLOC_014778	SDOW01000107.1	3655043	3659562	-	2657	0.41099	-0.025641	u	3
1877	TCONS_00041830	XLOC_014778	SDOW01000107.1	3655043	3659562	-	1849	0.451055	-0.0719425	u	4
1878	TCONS_00041831	XLOC_014778	SDOW01000107.1	3655043	3659562	-	2004	0.443613	-0.064117	u	4
1879	TCONS_00041832	XLOC_014778	SDOW01000107.1	3655043	3659562	-	4381	0.393746	0.00289855	u	2
1880	TCONS_00041834	XLOC_014778	SDOW01000107.1	3655043	3659562	-	1863	0.447665	-0.0695444	u	4
1881	TCONS_00041836	XLOC_014778	SDOW01000107.1	3655043	3659562	-	1972	0.442698	-0.0652921	u	5
1882	TCONS_00041837	XLOC_014778	SDOW01000107.1	3655043	3659562	-	2500	0.4144	-0.042471	u	4
1883	TCONS_00041838	XLOC_014778	SDOW01000107.1	3655043	3659562	-	2461	0.41284	-0.0374016	u	4
1884	TCONS_00041839	XLOC_014778	SDOW01000107.1	3655043	3659562	-	1902	0.449001	-0.0749415	u	4
1885	TCONS_00041841	XLOC_014778	SDOW01000107.1	3655043	3659562	-	2628	0.410198	-0.0371057	u	4
1886	TCONS_00041842	XLOC_014778	SDOW01000107.1	3655043	3659562	-	3062	0.4226	-0.015456	u	3
1887	TCONS_00041844	XLOC_014778	SDOW01000107.1	3655043	3659562	-	4275	0.394854	0	u	2
1888	TCONS_00041846	XLOC_014778	SDOW01000107.1	3655043	3659562	-	3115	0.400642	-0.0352564	u	3
1889	TCONS_00041848	XLOC_014778	SDOW01000107.1	3655043	3659562	-	3517	0.399204	-0.0213675	u	3
1890	TCONS_00041873	XLOC_014786	SDOW01000107.1	3569394	3571884	.	358	0.399441	0.00699301	u	1
1891	TCONS_00041874	XLOC_014787	SDOW01000107.1	3653268	3654065	.	797	0.528231	-0.0688836	u	1
1892	TCONS_00041875	XLOC_014788	SDOW01000107.1	4231455	4231861	.	406	0.41133	0.101796	u	1
1893	TCONS_00041887	XLOC_014794	SDOW01000108.1	396914	400614	+	1681	0.403331	0.112094	u	3
1894	TCONS_00042007	XLOC_014832	SDOW01000108.1	3026037	3034875	+	828	0.359903	-0.0738255	u	1
1895	TCONS_00042042	XLOC_014842	SDOW01000108.1	3587794	3593878	+	1094	0.537477	0.0884354	u	4
1896	TCONS_00042043	XLOC_014842	SDOW01000108.1	3587794	3593878	+	1039	0.539942	0.083779	u	4
1897	TCONS_00042044	XLOC_014842	SDOW01000108.1	3587794	3593878	+	1368	0.495614	0.0678466	u	5
1898	TCONS_00042056	XLOC_014851	SDOW01000108.1	396914	400614	-	2356	0.393463	-0.0981661	u	2
1899	TCONS_00042057	XLOC_014851	SDOW01000108.1	396914	400614	-	920	0.521739	0.0583333	u	4
1900	TCONS_00042059	XLOC_014851	SDOW01000108.1	396914	400614	-	1023	0.521994	0.0337079	u	4
1901	TCONS_00042145	XLOC_014877	SDOW01000108.1	2569964	2574376	-	954	0.568134	0.169742	u	4
1902	TCONS_00042146	XLOC_014877	SDOW01000108.1	2569964	2574376	-	1740	0.514368	0.0949721	u	4
1903	TCONS_00042147	XLOC_014877	SDOW01000108.1	2569964	2574376	-	1179	0.583545	0.101744	u	5
1904	TCONS_00042148	XLOC_014877	SDOW01000108.1	2569964	2574376	-	1000	0.603	-0.00497512	u	2
1905	TCONS_00042177	XLOC_014887	SDOW01000108.1	3035013	3037184	-	911	0.391877	0.137255	u	5
1906	TCONS_00042193	XLOC_014893	SDOW01000108.1	476870	477373	.	503	0.628231	0.113924	u	1
1907	TCONS_00042194	XLOC_014894	SDOW01000108.1	1446883	1448108	.	1225	0.502041	0.0796748	u	1
1908	TCONS_00042196	XLOC_014896	SDOW01000108.1	1711248	1712368	.	1120	0.342857	-0.09375	u	1
1909	TCONS_00042197	XLOC_014897	SDOW01000108.1	1820463	1821604	.	1141	0.349693	0.132832	u	1
1910	TCONS_00042309	XLOC_014945	SDOW01000109.1	2453208	2458173	-	561	0.595365	-0.149701	o	2
1911	TCONS_00042311	XLOC_014945	SDOW01000109.1	2453208	2458173	-	780	0.55	-0.174825	u	1
1912	TCONS_00042410	XLOC_014976	SDOW01000109.1	559891	560610	.	719	0.617524	0.193694	u	1
1913	TCONS_00042411	XLOC_014977	SDOW01000109.1	3619281	3619956	.	675	0.58963	0.160804	u	1
1914	TCONS_00042413	XLOC_014979	SDOW01000109.1	4470529	4471323	.	794	0.503778	0.135	u	1
1915	TCONS_00042709	XLOC_015077	SDOW01000110.1	3801271	3802249	-	696	0.524425	-0.00273973	u	3
1916	TCONS_00042710	XLOC_015078	SDOW01000110.1	3806293	3806824	-	454	0.550661	0.136	u	2
1917	TCONS_00042791	XLOC_015102	SDOW01000110.1	1527579	1527997	.	418	0.578947	0.0578512	u	1
1918	TCONS_00042793	XLOC_015104	SDOW01000110.1	4771139	4771813	.	674	0.700297	0.322034	u	1
1919	TCONS_00042894	XLOC_015135	SDOW01000111.1	888501	888860	.	359	0.587744	0.0331754	u	1
1920	TCONS_00042895	XLOC_015136	SDOW01000111.1	888970	889632	.	662	0.575529	-0.0393701	u	1
1921	TCONS_00042896	XLOC_015137	SDOW01000111.1	2501798	2502155	.	357	0.691877	-0.40081	u	1
1922	TCONS_00042897	XLOC_015138	SDOW01000111.1	3586341	3586702	.	361	0.590028	-0.0516432	u	1
1923	TCONS_00042931	XLOC_015156	SDOW01000112.1	1589897	1590991	+	1002	0.532934	-0.243446	u	2
1924	TCONS_00043117	XLOC_015236	SDOW01000112.1	1052282	1052522	.	240	0.5625	-0.288889	u	1
1925	TCONS_00043118	XLOC_015237	SDOW01000112.1	4127681	4128407	.	726	0.629477	-0.190372	u	1
1926	TCONS_00043119	XLOC_015238	SDOW01000112.1	6344557	6345670	.	1113	0.389039	-0.0207852	u	1
1927	TCONS_00043121	XLOC_015240	SDOW01000113.1	151087	152955	+	1623	0.441158	0.027933	u	3
1928	TCONS_00043122	XLOC_015240	SDOW01000113.1	151087	152955	+	1729	0.42915	0.0619946	u	2
1929	TCONS_00043123	XLOC_015240	SDOW01000113.1	151087	152955	+	1228	0.389251	0.171548	u	2
1930	TCONS_00043124	XLOC_015241	SDOW01000113.1	240061	241927	+	1756	0.426538	0.046729	u	2
1931	TCONS_00043125	XLOC_015241	SDOW01000113.1	240061	241927	+	1637	0.428222	0.021398	u	2
1932	TCONS_00043126	XLOC_015241	SDOW01000113.1	240061	241927	+	1464	0.415984	0.0279146	u	2
1933	TCONS_00043127	XLOC_015241	SDOW01000113.1	240061	241927	+	1501	0.412392	0.0726979	u	2
1934	TCONS_00043141	XLOC_015248	SDOW01000113.1	1812578	1818382	+	1319	0.478393	0.0206022	u	3
1935	TCONS_00043142	XLOC_015248	SDOW01000113.1	1812578	1818382	+	1073	0.506058	-0.00552486	u	3
1936	TCONS_00043172	XLOC_015261	SDOW01000113.1	3368802	3372635	+	1187	0.451559	-0.0410448	u	3
1937	TCONS_00043173	XLOC_015261	SDOW01000113.1	3368802	3372635	+	677	0.536189	-0.0688705	u	4
1938	TCONS_00043174	XLOC_015261	SDOW01000113.1	3368802	3372635	+	580	0.525862	-0.140984	u	3
1939	TCONS_00043175	XLOC_015261	SDOW01000113.1	3368802	3372635	+	568	0.526408	-0.137124	u	3
1940	TCONS_00043261	XLOC_015283	SDOW01000113.1	1812578	1818382	-	978	0.485685	0.00210526	u	2
1941	TCONS_00043262	XLOC_015283	SDOW01000113.1	1812578	1818382	-	1359	0.479765	-0.0245399	u	2
1942	TCONS_00043263	XLOC_015283	SDOW01000113.1	1812578	1818382	-	1066	0.496248	0.0094518	u	2
1943	TCONS_00043285	XLOC_015292	SDOW01000113.1	2941686	2947117	-	3493	0.391068	0.130307	u	3
1944	TCONS_00043288	XLOC_015292	SDOW01000113.1	2941686	2947117	-	5085	0.381711	0.0561566	u	2
1945	TCONS_00043289	XLOC_015292	SDOW01000113.1	2941686	2947117	-	5431	0.380777	0.0444874	u	1
1946	TCONS_00043322	XLOC_015304	SDOW01000113.1	153662	154141	.	479	0.334029	0.0375	u	1
1947	TCONS_00043323	XLOC_015305	SDOW01000113.1	154633	155126	.	493	0.294118	-0.0344828	u	1
1948	TCONS_00043324	XLOC_015306	SDOW01000113.1	156348	157473	.	1125	0.334222	0.0212766	u	1
1949	TCONS_00043325	XLOC_015307	SDOW01000113.1	244855	245263	.	408	0.313725	-0.21875	u	1
1950	TCONS_00043326	XLOC_015308	SDOW01000113.1	245597	246184	.	587	0.30494	-0.0726257	u	1
1951	TCONS_00043327	XLOC_015309	SDOW01000113.1	246875	247281	.	406	0.401478	0.116564	u	1
1952	TCONS_00043328	XLOC_015310	SDOW01000113.1	2940413	2940955	.	542	0.542435	-0.0204082	u	1
1953	TCONS_00043329	XLOC_015311	SDOW01000113.1	3283031	3283978	.	947	0.571278	0.112754	u	1
1954	TCONS_00043341	XLOC_015316	SDOW01000114.1	469010	470411	+	777	0.377091	-0.0307167	u	4
1955	TCONS_00043342	XLOC_015317	SDOW01000114.1	471637	473999	+	567	0.425044	0.0871369	u	5
1956	TCONS_00043343	XLOC_015317	SDOW01000114.1	471637	473999	+	450	0.415556	0.026738	u	5
1957	TCONS_00043359	XLOC_015325	SDOW01000114.1	1117941	1122533	+	1752	0.51484	0.0110865	u	8
1958	TCONS_00043360	XLOC_015325	SDOW01000114.1	1117941	1122533	+	1783	0.514302	0.00981461	u	9
1959	TCONS_00043368	XLOC_015325	SDOW01000114.1	1117941	1122533	+	2514	0.462609	0.0300946	u	8
1960	TCONS_00043376	XLOC_015325	SDOW01000114.1	1117941	1122533	+	1881	0.494949	0.0161117	u	8
1961	TCONS_00043378	XLOC_015325	SDOW01000114.1	1117941	1122533	+	1566	0.385696	0	u	3
1962	TCONS_00043382	XLOC_015329	SDOW01000114.1	1513418	1514556	+	539	0.569573	-0.257329	u	2
1963	TCONS_00043492	XLOC_015367	SDOW01000114.1	1117941	1122533	-	2608	0.375767	-0.0510204	u	2
1964	TCONS_00043564	XLOC_015383	SDOW01000114.1	2716719	2722869	-	687	0.452693	0.022508	u	3
1965	TCONS_00043599	XLOC_015404	SDOW01000114.1	1112143	1112611	.	468	0.423077	-0.191919	u	1
1966	TCONS_00043600	XLOC_015405	SDOW01000114.1	1115602	1116315	.	713	0.469846	0.0746269	u	1
1967	TCONS_00043626	XLOC_015422	SDOW01000115.1	2046880	2048222	+	889	0.536558	0.0566038	u	2
1968	TCONS_00043627	XLOC_015423	SDOW01000115.1	2048489	2049445	+	645	0.511628	-0.0969697	u	2
1969	TCONS_00043799	XLOC_015489	SDOW01000115.1	2039729	2040293	.	564	0.492908	-0.0791367	u	1
1970	TCONS_00043800	XLOC_015490	SDOW01000115.1	3722383	3722827	.	444	0.511261	-0.0132159	u	1
1971	TCONS_00043807	XLOC_015495	SDOW01000116.1	446293	450544	+	1417	0.382498	-0.140221	u	2
1972	TCONS_00043819	XLOC_015502	SDOW01000116.1	1469147	1469867	+	640	0.6125	-0.229592	u	2
1973	TCONS_00043820	XLOC_015502	SDOW01000116.1	1469147	1469867	+	508	0.624016	-0.198738	u	3
1974	TCONS_00043889	XLOC_015528	SDOW01000116.1	4011892	4013270	+	1284	0.492991	-0.0963665	u	2
1975	TCONS_00043890	XLOC_015528	SDOW01000116.1	4011892	4013270	+	940	0.521277	-0.114286	u	3
1976	TCONS_00043940	XLOC_015551	SDOW01000116.1	457374	458568	-	1084	0.372694	0	u	1
1977	TCONS_00044022	XLOC_015583	SDOW01000116.1	451591	452072	.	481	0.598753	-0.00694444	u	1
1978	TCONS_00044024	XLOC_015585	SDOW01000116.1	2968056	2968288	.	232	0.331897	-0.168831	u	1
1979	TCONS_00044073	XLOC_015595	SDOW01000117.1	1491226	1495898	+	2460	0.485772	0.032636	u	3
1980	TCONS_00044075	XLOC_015595	SDOW01000117.1	1491226	1495898	+	2953	0.481206	0.0288529	u	3
1981	TCONS_00044077	XLOC_015595	SDOW01000117.1	1491226	1495898	+	2440	0.50123	0.0155356	u	6
1982	TCONS_00044078	XLOC_015595	SDOW01000117.1	1491226	1495898	+	2770	0.499278	0.0339841	u	5
1983	TCONS_00044079	XLOC_015595	SDOW01000117.1	1491226	1495898	+	2460	0.509756	0.0430622	u	5
1984	TCONS_00044080	XLOC_015595	SDOW01000117.1	1491226	1495898	+	2471	0.513962	0.0488189	u	6
1985	TCONS_00044081	XLOC_015595	SDOW01000117.1	1491226	1495898	+	2810	0.496085	0.0344333	u	4
1986	TCONS_00044082	XLOC_015595	SDOW01000117.1	1491226	1495898	+	2522	0.486122	0.0326264	u	3
1987	TCONS_00044083	XLOC_015595	SDOW01000117.1	1491226	1495898	+	3035	0.482702	0.0307167	u	3
1988	TCONS_00044084	XLOC_015595	SDOW01000117.1	1491226	1495898	+	2756	0.494194	0.0455213	u	4
1989	TCONS_00044151	XLOC_015616	SDOW01000117.1	3891702	3898553	+	969	0.52838	-0.125	u	3
1990	TCONS_00044152	XLOC_015617	SDOW01000117.1	4230903	4236122	+	571	0.499124	-0.108772	u	3
1991	TCONS_00044153	XLOC_015617	SDOW01000117.1	4230903	4236122	+	288	0.395833	-0.0701754	u	2
1992	TCONS_00044225	XLOC_015642	SDOW01000117.1	1802038	1807868	-	1031	0.468477	0.00621118	u	1
1993	TCONS_00044429	XLOC_015702	SDOW01000118.1	1639023	1647118	-	792	0.535354	0.0754717	u	4
1994	TCONS_00044486	XLOC_015729	SDOW01000118.1	2742254	2742536	.	282	0.464539	-0.0229008	u	1
1995	TCONS_00044487	XLOC_015730	SDOW01000118.1	2742869	2743100	.	231	0.614719	-0.169014	u	1
1996	TCONS_00044488	XLOC_015731	SDOW01000118.1	2744487	2745121	.	634	0.567823	0.05	u	1
1997	TCONS_00044489	XLOC_015732	SDOW01000118.1	2747614	2747877	.	263	0.429658	-0.00884956	u	1
1998	TCONS_00044490	XLOC_015733	SDOW01000118.1	4902278	4903628	.	1350	0.448148	-0.216529	u	1
[truncated: 7,416 more rows]
