# Supplementary material for: Transcriptome Screening of Long Noncoding RNAs and Their Target Protein-Coding Genes Unmasks a Dynamic Portrait of Seed Coat Coloration Associated with Anthocyanins in Tibetan Hulless Barley
Source: Int J Mol Sci. 2023 Jun 24;24(13):10587. doi: 10.3390/ijms241310587 (PMC10341697; doi:10.3390/ijms241310587)
Supplement: Supplementary file 1 [file ijms-24-10587-s001.zip › Table S2. Length distribution of lncRNAs in Tibetan hulless barley seed coats.xlsx]

## Sheet: Sheet1
Table S2. Length distribution of lncRNAs in Tibetan hulless barley seed coats.
Length (nt)	Numbers
200-399	1348
400-599	1607
600-799	1384
800-999	1076
1000-1199	855
1200-1399	589
1400-1599	424
1600-1799	377
1800-1999	321
2000-2999	969
>3000	464
