# Supplementary material for: Transcriptome Screening of Long Noncoding RNAs and Their Target Protein-Coding Genes Unmasks a Dynamic Portrait of Seed Coat Coloration Associated with Anthocyanins in Tibetan Hulless Barley
Source: Int J Mol Sci. 2023 Jun 24;24(13):10587. doi: 10.3390/ijms241310587 (PMC10341697; doi:10.3390/ijms241310587)
Supplement: Supplementary file 1 [file ijms-24-10587-s001.zip › Table S3. The exon number of lncRNAs in Tibetan hulless barley seed coats.xlsx]

## Sheet: Sheet1
Table S3. The exon number of lncRNAs in Tibetan hulless barley seed coats.
Exon number	Numbers
1	3282
2	2160
3	1405
4	986
5	631
6	451
7	261
8	115
9	58
10	25
11	17
12	7
13	5
14	3
15	2
16	1
17	3
19	2
