# Supplementary material for: Transcriptome Screening of Long Noncoding RNAs and Their Target Protein-Coding Genes Unmasks a Dynamic Portrait of Seed Coat Coloration Associated with Anthocyanins in Tibetan Hulless Barley
Source: Int J Mol Sci. 2023 Jun 24;24(13):10587. doi: 10.3390/ijms241310587 (PMC10341697; doi:10.3390/ijms241310587)
Supplement: Supplementary file 1 [file ijms-24-10587-s001.zip › Table S4. The number of homologous lncRNAs in Tibetan hulless barley seed coats compared with 39 other species.xlsx]

## Sheet: Sheet1
Table S4. The number of homologous lncRNAs in Tibetan hulless barley seed coats compared with 39 other species.
Species	Number
Amborella trichopoda	6
Ananas comosus	12
Arabidopsis lyrata	0
Arabidopsis thaliana	0
Brachypodium distachyon	102
Brassica napus	1
Brassica oleracea	1
Brassica rapa	1
Chenopodium quinoa	1
Chlamydomonas reinhardtii	0
Chondrus crispus	0
Corchorus capsularis	0
Cucumis sativus	0
Galdieria sulphuraria	0
Glycine max	0
Hordeum vulgare	3892
Leersia perrieri	33
Malus domestica	10
Manihot esculenta	0
Medicago truncatula	1
Musa acuminata	5
Oryza barthii	51
Oryza brachyantha	41
Oryza nivara	28
Oryza punctata	29
Oryza rufipogon	30
Oryza sativa Japonica	7
Physcomitrella patens	0
Populus trichocarpa	2
Prunus persica	1
Selaginella moellendorffii	0
Setaria italica	28
Solanum lycopersicum	0
Solanum tuberosum	0
Sorghum bicolor	18
Theobroma cacao	2
Trifolium pratense	1
Vitis vinifera	2
Zea mays	6
