# Supplementary material for: Transcriptome Screening of Long Noncoding RNAs and Their Target Protein-Coding Genes Unmasks a Dynamic Portrait of Seed Coat Coloration Associated with Anthocyanins in Tibetan Hulless Barley
Source: Int J Mol Sci. 2023 Jun 24;24(13):10587. doi: 10.3390/ijms241310587 (PMC10341697; doi:10.3390/ijms241310587)
Supplement: Supplementary file 1 [file ijms-24-10587-s001.zip › Table S5. Homologous lncRNAs in Tibetan hulless barley seed coats compared with 39 other species.xlsx]

## Sheet: Sheet1
Table S5. Homologous lncRNAs in Tibetan hulless barley seed coats compared with 39 other species.
Amborella trichopoda			Hordeum vulgare			Leersia perrieri			Malus domestica			Manihot esculenta		Musa acuminata			Oryza barthii			Oryza brachyantha			Oryza nivara			Oryza punctata			Oryza rufipogon			Oryza sativa Japonica			Populus trichocarpa			Setaria italica			Sorghum bicolor			Sorghum bicolor			Theobroma cacao
CNT2017273	TCONS_00091627		CNT20169075	TCONS_00127494		CNT20208324	TCONS_00089448		CNT2045864	TCONS_00023714		CNT20208922	TCONS_00092349	CNT20110081	TCONS_00044897		CNT20235061	TCONS_00047612		CNT20108800	TCONS_00146761		CNT2084768	TCONS_00036608		CNT20160953	TCONS_00105191		CNT20140554	TCONS_00156696		CNT20188162	TCONS_00015863		CNT2075246	TCONS_00023714		CNT2099766	TCONS_00023714		CNT20143258	TCONS_00174807		CNT20224135	TCONS_00023714		CNT20127952	TCONS_00023714
CNT2017273	TCONS_00091622		CNT20169073	TCONS_00115110		CNT20208314	TCONS_00084777		CNT2045856	TCONS_00023714				CNT20110081	TCONS_00044896		CNT20234877	TCONS_00201199		CNT20108215	TCONS_00169772		CNT2084578	TCONS_00036608		CNT20160938	TCONS_00023714		CNT20140481	TCONS_00049322		CNT20187544	TCONS_00135331		CNT2075246	TCONS_00023713		CNT2099766	TCONS_00023713		CNT20143258	TCONS_00174809		CNT20224135	TCONS_00023713
CNT2017273	TCONS_00091616		CNT20169073	TCONS_00115110		CNT20208314	TCONS_00084776		CNT2045847	TCONS_00023714				CNT20110081	TCONS_00044895		CNT20234392	TCONS_00179243		CNT20108126	TCONS_00003324		CNT2083588	TCONS_00161511		CNT20160938	TCONS_00023713		CNT20140062	TCONS_00012593		CNT20187516	TCONS_00120310					CNT2099480	TCONS_00038122		CNT20143258	TCONS_00174806
CNT2017273	TCONS_00023714		CNT20169073	TCONS_00115112		CNT20207891	TCONS_00138902		CNT2045702	TCONS_00194108				CNT20110081	TCONS_00103141		CNT20234392	TCONS_00179242		CNT20107887	TCONS_00109031		CNT2083453	TCONS_00066879		CNT20160900	TCONS_00049322		CNT20140037	TCONS_00061303		CNT20187249	TCONS_00110269					CNT2099480	TCONS_00038121		CNT20142970	TCONS_00178057
CNT2016520	TCONS_00194108		CNT20169073	TCONS_00115112		CNT20207768	TCONS_00032481		CNT2045701	TCONS_00194108				CNT20110080	TCONS_00044897		CNT20234392	TCONS_00103141		CNT20107777	TCONS_00186629		CNT2082687	TCONS_00114325		CNT20160860	TCONS_00174807		CNT20139597	TCONS_00049322		CNT20187249	TCONS_00110268		Prunus persica			CNT2099480	TCONS_00038119		CNT20142970	TCONS_00178056
CNT2015626	TCONS_00029293		CNT20169073	TCONS_00115111		CNT20207768	TCONS_00032480		CNT2045632	TCONS_00023714				CNT20110080	TCONS_00044896		CNT20234392	TCONS_00044897		CNT20107645	TCONS_00043564		CNT2082657	TCONS_00201199		CNT20160860	TCONS_00174809		CNT20139501	TCONS_00146227		CNT20187144	TCONS_00010938		CNT20190988	TCONS_00023714		CNT2099480	TCONS_00038118		CNT20142623	TCONS_00055601
			CNT20169073	TCONS_00115111		CNT20207683	TCONS_00115591		CNT2045631	TCONS_00023714				CNT20110080	TCONS_00044895		CNT20234392	TCONS_00044896		CNT20107588	TCONS_00112894		CNT2082484	TCONS_00061303		CNT20160860	TCONS_00174806		CNT20139338	TCONS_00200489		CNT20187138	TCONS_00138902					CNT2099480	TCONS_00038123		CNT20142623	TCONS_00055600
Ananas comosus			CNT20169073	TCONS_00115113		CNT20207682	TCONS_00115591		CNT2045630	TCONS_00023714				CNT20110080	TCONS_00103141		CNT20234392	TCONS_00044895		CNT20107380	TCONS_00127859		CNT2082160	TCONS_00169758		CNT20160741	TCONS_00034874		CNT20139048	TCONS_00146761								CNT2099197	TCONS_00036608		CNT20142615	TCONS_00152012
CNT20201566	TCONS_00036662		CNT20169073	TCONS_00115113		CNT20207680	TCONS_00115591		CNT2045629	TCONS_00023714				CNT20110079	TCONS_00044897		CNT20234000	TCONS_00089465		CNT20107349	TCONS_00094828		CNT2082160	TCONS_00169757		CNT20160670	TCONS_00164150		CNT20138895	TCONS_00047612								CNT2099196	TCONS_00036608		CNT20142590	TCONS_00043940
CNT20198449	TCONS_00013239		CNT20169073	TCONS_00106427		CNT20207679	TCONS_00115591		CNT2045625	TCONS_00023714				CNT20110079	TCONS_00044896		CNT20233961	TCONS_00134326		CNT20106908	TCONS_00120286		CNT2080781	TCONS_00087988		CNT20160667	TCONS_00164150		CNT20138894	TCONS_00047612								CNT2098993	TCONS_00129345		CNT20142590	TCONS_00148723
CNT20198448	TCONS_00013239		CNT20169073	TCONS_00106425		CNT20207657	TCONS_00116870		CNT2045624	TCONS_00023714				CNT20110079	TCONS_00044895		CNT20233961	TCONS_00134325		CNT20106908	TCONS_00120286		CNT2080699	TCONS_00032408		CNT20160602	TCONS_00061303		CNT20138371	TCONS_00049322								CNT2098778	TCONS_00038122		CNT20142590	TCONS_00171028
CNT20198447	TCONS_00013239		CNT20169072	TCONS_00115113		CNT20207414	TCONS_00026921		CNT2043055	TCONS_00088713				CNT20110079	TCONS_00103141		CNT20233961	TCONS_00134324		CNT20106908	TCONS_00120285		CNT2080697	TCONS_00032408		CNT20160601	TCONS_00061303		CNT20138262	TCONS_00104632								CNT2098778	TCONS_00038121		CNT20142313	TCONS_00011757
CNT20197407	TCONS_00132450		CNT20169072	TCONS_00115111		CNT20207267	TCONS_00129345		CNT2043031	TCONS_00023714							CNT20233828	TCONS_00034874		CNT20106907	TCONS_00120286		CNT2080697	TCONS_00032408		CNT20160599	TCONS_00061303		CNT20138261	TCONS_00104632								CNT2098778	TCONS_00038119		CNT20142311	TCONS_00011756
CNT20197406	TCONS_00132450		CNT20169072	TCONS_00115112		CNT20207082	TCONS_00108808		CNT2043030	TCONS_00023714							CNT20233827	TCONS_00034874		CNT20106907	TCONS_00120285		CNT2080696	TCONS_00037465		CNT20160595	TCONS_00014582		CNT20138260	TCONS_00104632								CNT2098778	TCONS_00038118		CNT20141153	TCONS_00111657
CNT20197329	TCONS_00073667		CNT20169072	TCONS_00115112		CNT20207082	TCONS_00108804		CNT2043029	TCONS_00023714							CNT20233749	TCONS_00124749		CNT20106906	TCONS_00120286		CNT2080418	TCONS_00164106		CNT20160579	TCONS_00114325		CNT20138259	TCONS_00104632								CNT2098778	TCONS_00038123		CNT20141153	TCONS_00111656
CNT20197329	TCONS_00073665		CNT20169072	TCONS_00115110		CNT20206864	TCONS_00047612		CNT2041240	TCONS_00023714							CNT20233519	TCONS_00017807		CNT20106906	TCONS_00120286		CNT2080302	TCONS_00104760		CNT20160530	TCONS_00138900		CNT20138258	TCONS_00104632								CNT2098777	TCONS_00038123		CNT20141153	TCONS_00111655
CNT20197328	TCONS_00073667		CNT20169072	TCONS_00115110		CNT20206768	TCONS_00079883		CNT2041240	TCONS_00023713							CNT20233305	TCONS_00112894		CNT20106906	TCONS_00120285		CNT2079496	TCONS_00111187		CNT20160529	TCONS_00138900		CNT20138236	TCONS_00032408								CNT2098777	TCONS_00038122		CNT20141151	TCONS_00111657
CNT20197328	TCONS_00073665		CNT20169070	TCONS_00094937		CNT20206768	TCONS_00079882		CNT2039437	TCONS_00023714							CNT20233304	TCONS_00112894		CNT20106849	TCONS_00049322		CNT2079373	TCONS_00034874		CNT20160521	TCONS_00094828		CNT20137955	TCONS_00058359								CNT2098777	TCONS_00038121		CNT20141151	TCONS_00111656
CNT20196976	TCONS_00091627		CNT20169070	TCONS_00175633		CNT20206768	TCONS_00079881		CNT2038005	TCONS_00025337							CNT20232775	TCONS_00091622		CNT20106498	TCONS_00109031		CNT2079372	TCONS_00034874		CNT20160521	TCONS_00094828		CNT20137866	TCONS_00049322								CNT2098777	TCONS_00038119		CNT20141151	TCONS_00111655
CNT20196976	TCONS_00091622		CNT20169070	TCONS_00175632		CNT20206768	TCONS_00079880		CNT2038002	TCONS_00025337							CNT20232775	TCONS_00091616		CNT20106498	TCONS_00124649		CNT2079371	TCONS_00034874		CNT20160520	TCONS_00094828		CNT20137666	TCONS_00152012								CNT2098777	TCONS_00038118		CNT20141150	TCONS_00111657
CNT20196976	TCONS_00091616		CNT20169070	TCONS_00175631		CNT20206768	TCONS_00079879		CNT2036974	TCONS_00091622							CNT20232775	TCONS_00091627		CNT20106495	TCONS_00124649		CNT2078993	TCONS_00202111		CNT20160520	TCONS_00094828		CNT20137665	TCONS_00152012								CNT2098735	TCONS_00116698		CNT20141150	TCONS_00111656
CNT20196976	TCONS_00023714		CNT20169070	TCONS_00175630		CNT20206768	TCONS_00079878		CNT2036974	TCONS_00091616							CNT20232568	TCONS_00110269		CNT20106247	TCONS_00111657		CNT2078783	TCONS_00032408		CNT20160473	TCONS_00049322		CNT20137664	TCONS_00152012								CNT20102806	TCONS_00025337		CNT20141150	TCONS_00111655
CNT20196262	TCONS_00161946		CNT20169070	TCONS_00167346		CNT20206735	TCONS_00014571		CNT2036974	TCONS_00091627							CNT20232568	TCONS_00110268		CNT20106247	TCONS_00111656		CNT2078776	TCONS_00115043		CNT20160439	TCONS_00017807		CNT20137520	TCONS_00044897								CNT20102657	TCONS_00078904		CNT20141098	TCONS_00124663
CNT20196262	TCONS_00161945		CNT20169070	TCONS_00116232		CNT20206231	TCONS_00026921		CNT2035780	TCONS_00044932							CNT20232332	TCONS_00026921		CNT20106247	TCONS_00111655		CNT2078775	TCONS_00115043		CNT20160439	TCONS_00023431		CNT20137520	TCONS_00044896								CNT20102431	TCONS_00160662
CNT20194603	TCONS_00076155		CNT20169070	TCONS_00017030		CNT20205652	TCONS_00008402										CNT20232332	TCONS_00115311		CNT20106042	TCONS_00104632		CNT2078774	TCONS_00115043		CNT20160419	TCONS_00179243		CNT20137520	TCONS_00044895								CNT20102241	TCONS_00026921
CNT20193710	TCONS_00161946		CNT20169070	TCONS_00072104		CNT20205417	TCONS_00104760										CNT20232262	TCONS_00152012		CNT20106041	TCONS_00104632		CNT2078771	TCONS_00115043		CNT20160419	TCONS_00179242		CNT20137520	TCONS_00103141								CNT20101996	TCONS_00161010
CNT20193710	TCONS_00161945		CNT20169070	TCONS_00072103		CNT20205201	TCONS_00058359										CNT20232261	TCONS_00152012		CNT20105935	TCONS_00097983		CNT2078770	TCONS_00115043		CNT20159972	TCONS_00045947		CNT20136120	TCONS_00044897								CNT20101996	TCONS_00161011
CNT20193709	TCONS_00161946		CNT20169070	TCONS_00065249		CNT20204761	TCONS_00014571										CNT20232018	TCONS_00045947		CNT20105775	TCONS_00094921		CNT2078768	TCONS_00115043		CNT20159762	TCONS_00047612		CNT20136120	TCONS_00044896								CNT20101990	TCONS_00161010
CNT20193709	TCONS_00161945		CNT20169070	TCONS_00065248		CNT20204757	TCONS_00014571										CNT20232005	TCONS_00024713		CNT20105775	TCONS_00094919		CNT2078748	TCONS_00068379		CNT20159419	TCONS_00134326		CNT20136120	TCONS_00044895								CNT20101990	TCONS_00161011
			CNT20169070	TCONS_00124473		CNT20203875	TCONS_00038251										CNT20232005	TCONS_00024712		CNT20105775	TCONS_00094918		CNT2078473	TCONS_00002552		CNT20159419	TCONS_00134325		CNT20136120	TCONS_00103141								CNT20101495	TCONS_00077744
Brachypodium distachyon			CNT20169070	TCONS_00124091		CNT20203364	TCONS_00090326										CNT20232005	TCONS_00024711		CNT20105381	TCONS_00094921		CNT2078451	TCONS_00049322		CNT20159419	TCONS_00134324		CNT20135919	TCONS_00115396								CNT20101495	TCONS_00077743
CNT2022364	TCONS_00117066		CNT20169069	TCONS_00096682		CNT20203364	TCONS_00090154										CNT20232005	TCONS_00024710		CNT20105381	TCONS_00094919		CNT2078359	TCONS_00111187		CNT20159064	TCONS_00094828		CNT20135850	TCONS_00066879								CNT20101475	TCONS_00086997
CNT2022311	TCONS_00197031		CNT20169069	TCONS_00096682		CNT20203363	TCONS_00090326										CNT20232005	TCONS_00024709		CNT20105381	TCONS_00094918		CNT2078011	TCONS_00105101		CNT20159064	TCONS_00094828		CNT20135715	TCONS_00115043								CNT20101400	TCONS_00100849
CNT2022295	TCONS_00094828		CNT20169069	TCONS_00096681		CNT20203363	TCONS_00090154										CNT20232005	TCONS_00024708		CNT20105322	TCONS_00085578		CNT2078011	TCONS_00105101		CNT20158654	TCONS_00014582		CNT20135190	TCONS_00010938								CNT20101398	TCONS_00094828
CNT2022295	TCONS_00094828		CNT20169069	TCONS_00096681		CNT20203334	TCONS_00122118										CNT20231952	TCONS_00068379		CNT20105165	TCONS_00091622		CNT2078011	TCONS_00105102		CNT20158592	TCONS_00152012		CNT20134677	TCONS_00036608								CNT20101398	TCONS_00094828
CNT2022295	TCONS_00094828		CNT20169069	TCONS_00096674		CNT20202918	TCONS_00108320										CNT20231630	TCONS_00104632		CNT20105165	TCONS_00091616		CNT2078011	TCONS_00105102		CNT20158298	TCONS_00090647		CNT20133145	TCONS_00002388								CNT20101380	TCONS_00188931
CNT2022265	TCONS_00152012		CNT20169069	TCONS_00096672		CNT20202757	TCONS_00023714										CNT20231558	TCONS_00104632		CNT20105165	TCONS_00091627		CNT2077619	TCONS_00081911		CNT20158276	TCONS_00019337		CNT20132795	TCONS_00049322								CNT20101380	TCONS_00188930
CNT2022129	TCONS_00112894		CNT20169068	TCONS_00016447		CNT20202757	TCONS_00023713										CNT20231298	TCONS_00015863		CNT20105098	TCONS_00043564		CNT2077518	TCONS_00087061		CNT20158089	TCONS_00172122		CNT20132631	TCONS_00049322								CNT20101379	TCONS_00081911
CNT2022122	TCONS_00146761		CNT20169068	TCONS_00016448		CNT20202756	TCONS_00023714										CNT20231058	TCONS_00092349		CNT20104848	TCONS_00122118		CNT2077502	TCONS_00089465		CNT20157974	TCONS_00063680		CNT20132475	TCONS_00077744								CNT20100499	TCONS_00104071
CNT2022122	TCONS_00146761		CNT20169067	TCONS_00016447		CNT20202756	TCONS_00023713										CNT20230557	TCONS_00049322		CNT20104372	TCONS_00068379		CNT2077487	TCONS_00114629		CNT20157973	TCONS_00063680		CNT20132475	TCONS_00077743								CNT20100499	TCONS_00104167
CNT2022116	TCONS_00183405		CNT20169066	TCONS_00003120		CNT20202237	TCONS_00165650										CNT20230371	TCONS_00002388		CNT20104371	TCONS_00068379		CNT2076816	TCONS_00158299					CNT20132189	TCONS_00077744								CNT20100311	TCONS_00069733
CNT2022035	TCONS_00094597		CNT20169066	TCONS_00003119		CNT20202236	TCONS_00165650										CNT20229570	TCONS_00122619		CNT20104245	TCONS_00036662		CNT2076648	TCONS_00063680					CNT20132189	TCONS_00077743
CNT2022035	TCONS_00094596		CNT20169065	TCONS_00197859		CNT20202048	TCONS_00167045										CNT20229527	TCONS_00153816		CNT20104179	TCONS_00114629		CNT2076392	TCONS_00179243					CNT20132158	TCONS_00049322
CNT2021992	TCONS_00178772		CNT20169065	TCONS_00197860													CNT20229288	TCONS_00085505		CNT20104178	TCONS_00114629		CNT2076392	TCONS_00179242					CNT20131869	TCONS_00081911
CNT2021992	TCONS_00178853		CNT20169058	TCONS_00201620													CNT20229288	TCONS_00085504		CNT20104178	TCONS_00114629		CNT2076392	TCONS_00103141					CNT20131373	TCONS_00105251
CNT2021956	TCONS_00023714		CNT20169058	TCONS_00201620													CNT20229288	TCONS_00019763		CNT20103906	TCONS_00111084		CNT2076392	TCONS_00044897					CNT20131240	TCONS_00049322
CNT2021956	TCONS_00023713		CNT20169058	TCONS_00201620													CNT20229288	TCONS_00019762		CNT20103906	TCONS_00111083		CNT2076392	TCONS_00044896					CNT20131218	TCONS_00048758
CNT2021956	TCONS_00091627		CNT20169058	TCONS_00201618													CNT20229235	TCONS_00058359		CNT20103889	TCONS_00079883		CNT2076392	TCONS_00044895					CNT20131218	TCONS_00048757
CNT2021956	TCONS_00091622		CNT20169058	TCONS_00201618													CNT20229231	TCONS_00130783		CNT20103889	TCONS_00079882		CNT2076390	TCONS_00179243					CNT20130869	TCONS_00063680
CNT2021956	TCONS_00091616		CNT20169058	TCONS_00201618													CNT20228957	TCONS_00089465		CNT20103889	TCONS_00079881		CNT2076390	TCONS_00179242					CNT20130868	TCONS_00063680
CNT2021949	TCONS_00124915		CNT20169058	TCONS_00158727													CNT20228813	TCONS_00161010		CNT20103889	TCONS_00079880		CNT2076390	TCONS_00103141					CNT20130615	TCONS_00115043
CNT2021940	TCONS_00087988		CNT20169058	TCONS_00188506													CNT20228813	TCONS_00161011		CNT20103889	TCONS_00079879		CNT2076390	TCONS_00044897
CNT2021900	TCONS_00129345		CNT20169054	TCONS_00153741													CNT20228813	TCONS_00161011		CNT20103889	TCONS_00079878		CNT2076390	TCONS_00044896
CNT2021856	TCONS_00159687		CNT20169054	TCONS_00158276													CNT20228799	TCONS_00108320		CNT20103888	TCONS_00079883		CNT2076390	TCONS_00044895
CNT2021856	TCONS_00159686		CNT20169054	TCONS_00063682													CNT20228771	TCONS_00076575		CNT20103888	TCONS_00079882		CNT2076363	TCONS_00161011
CNT2021856	TCONS_00159684		CNT20169049	TCONS_00197649													CNT20228375	TCONS_00108320		CNT20103888	TCONS_00079881		CNT2076363	TCONS_00161011
CNT2021856	TCONS_00159685		CNT20169049	TCONS_00197651													CNT20228300	TCONS_00019337		CNT20103888	TCONS_00079880		CNT2076363	TCONS_00161010
CNT2021686	TCONS_00122619		CNT20169049	TCONS_00197650													CNT20228206	TCONS_00104632		CNT20103888	TCONS_00079879		CNT2076361	TCONS_00161011
CNT2021652	TCONS_00122619		CNT20169049	TCONS_00067641													CNT20228205	TCONS_00104632		CNT20103888	TCONS_00079878		CNT2076361	TCONS_00161011
CNT2021639	TCONS_00093967		CNT20169049	TCONS_00067636													CNT20228085	TCONS_00124749		CNT20103636	TCONS_00089465		CNT2076361	TCONS_00161010
CNT2021612	TCONS_00147668		CNT20169049	TCONS_00067635																CNT20103563	TCONS_00117066		CNT2076122	TCONS_00084471
CNT2021428	TCONS_00183405		CNT20169049	TCONS_00067629																CNT20103143	TCONS_00089465		CNT2076121	TCONS_00084471
CNT2021413	TCONS_00183405		CNT20169049	TCONS_00029298																CNT20102975	TCONS_00146227
CNT2021316	TCONS_00108320		CNT20169049	TCONS_00148053
CNT2021312	TCONS_00111083		CNT20169049	TCONS_00201916
CNT2021124	TCONS_00011756		CNT20169049	TCONS_00201913
CNT2021124	TCONS_00011757		CNT20169048	TCONS_00012583
CNT2021041	TCONS_00011757		CNT20169048	TCONS_00201916
CNT2021041	TCONS_00011756		CNT20169048	TCONS_00201913
CNT2021022	TCONS_00111187		CNT20169048	TCONS_00201919
CNT2021022	TCONS_00111187		CNT20169048	TCONS_00201915
CNT2021006	TCONS_00070312		CNT20169048	TCONS_00201914
CNT2021006	TCONS_00070311		CNT20169048	TCONS_00201912
CNT2021001	TCONS_00070312		CNT20169048	TCONS_00201911
CNT2021001	TCONS_00070311		CNT20169048	TCONS_00201910
CNT2020998	TCONS_00070312		CNT20169047	TCONS_00197651
CNT2020998	TCONS_00070311		CNT20169047	TCONS_00197650
CNT2020996	TCONS_00070312		CNT20169047	TCONS_00197649
CNT2020996	TCONS_00070311		CNT20169047	TCONS_00012583
CNT2020995	TCONS_00070312		CNT20169047	TCONS_00067641
CNT2020995	TCONS_00070311		CNT20169047	TCONS_00067636
CNT2020879	TCONS_00094597		CNT20169047	TCONS_00067635
CNT2020879	TCONS_00094596		CNT20169047	TCONS_00067629
CNT2020811	TCONS_00103141		CNT20169045	TCONS_00096682
CNT2020811	TCONS_00044897		CNT20169045	TCONS_00096681
CNT2020811	TCONS_00044896		CNT20169045	TCONS_00096674
CNT2020811	TCONS_00044895		CNT20169045	TCONS_00096672
CNT2020785	TCONS_00201333		CNT20169043	TCONS_00038736
CNT2020785	TCONS_00201332		CNT20169043	TCONS_00038736
CNT2020735	TCONS_00152468		CNT20169043	TCONS_00156239
CNT2020735	TCONS_00152470		CNT20169043	TCONS_00156239
CNT2020735	TCONS_00152469		CNT20169043	TCONS_00200895
CNT2020635	TCONS_00183405		CNT20169043	TCONS_00200895
CNT2020633	TCONS_00183405		CNT20169043	TCONS_00200894
CNT2020631	TCONS_00183405		CNT20169043	TCONS_00200894
CNT2020587	TCONS_00011757		CNT20169043	TCONS_00200893
CNT2020587	TCONS_00011756		CNT20169043	TCONS_00200893
CNT2020505	TCONS_00111385		CNT20169041	TCONS_00066058
CNT2020505	TCONS_00111384		CNT20169039	TCONS_00175633
CNT2020339	TCONS_00097038		CNT20169039	TCONS_00175632
CNT2020339	TCONS_00097038		CNT20169039	TCONS_00175631
CNT2020339	TCONS_00097261		CNT20169039	TCONS_00175630
CNT2020337	TCONS_00097038		CNT20169039	TCONS_00047750
CNT2020228	TCONS_00094597		CNT20169036	TCONS_00149845
CNT2020228	TCONS_00094596		CNT20169035	TCONS_00133938
CNT2020227	TCONS_00094597		CNT20169035	TCONS_00149526
CNT2020227	TCONS_00094596		CNT20169035	TCONS_00177115
CNT2020127	TCONS_00047612		CNT20169035	TCONS_00133940
CNT2020127	TCONS_00047612		CNT20169035	TCONS_00149527
CNT2020122	TCONS_00174806		CNT20169031	TCONS_00072312
CNT2020122	TCONS_00174806		CNT20169031	TCONS_00072312
CNT2020122	TCONS_00174809		CNT20169031	TCONS_00072312
CNT2020122	TCONS_00174809		CNT20169031	TCONS_00072314
CNT2020122	TCONS_00174807		CNT20169031	TCONS_00133665
CNT2020122	TCONS_00174807		CNT20169031	TCONS_00185265
CNT2020117	TCONS_00174806		CNT20169031	TCONS_00104324
CNT2020117	TCONS_00174806		CNT20169031	TCONS_00104323
CNT2020117	TCONS_00174809		CNT20169031	TCONS_00006678
CNT2020117	TCONS_00174809		CNT20169031	TCONS_00006677
CNT2020117	TCONS_00174807		CNT20169031	TCONS_00006676
CNT2020117	TCONS_00174807		CNT20169031	TCONS_00006675
CNT2020036	TCONS_00080261		CNT20169031	TCONS_00006673
CNT2020035	TCONS_00080261		CNT20169031	TCONS_00133669
CNT2020010	TCONS_00079659		CNT20169031	TCONS_00133667
CNT2020009	TCONS_00183405		CNT20169031	TCONS_00133666
CNT2019854	TCONS_00014582		CNT20169031	TCONS_00133662
CNT2019739	TCONS_00174809		CNT20169031	TCONS_00133661
CNT2019739	TCONS_00174809		CNT20169031	TCONS_00133658
CNT2019739	TCONS_00174807		CNT20169031	TCONS_00006674
CNT2019739	TCONS_00174807		CNT20169031	TCONS_00185267
CNT2019739	TCONS_00174806		CNT20169031	TCONS_00185266
CNT2019739	TCONS_00174806		CNT20169031	TCONS_00185261
CNT2019720	TCONS_00036106		CNT20169031	TCONS_00185259
CNT2019618	TCONS_00111656		CNT20169031	TCONS_00185258
CNT2019618	TCONS_00111655		CNT20169031	TCONS_00133659
CNT2019618	TCONS_00111657		CNT20169031	TCONS_00185264
CNT2019618	TCONS_00111660		CNT20169030	TCONS_00072312
CNT2019618	TCONS_00111659		CNT20169030	TCONS_00072312
CNT2019618	TCONS_00111658		CNT20169030	TCONS_00072314
CNT2019472	TCONS_00062124		CNT20169030	TCONS_00133665
CNT2019310	TCONS_00085573		CNT20169030	TCONS_00185265
CNT2019298	TCONS_00169675		CNT20169030	TCONS_00104324
CNT2019298	TCONS_00169746		CNT20169030	TCONS_00104323
CNT2019298	TCONS_00169745		CNT20169030	TCONS_00006678
CNT2019247	TCONS_00062124		CNT20169030	TCONS_00006677
CNT2019199	TCONS_00088260		CNT20169030	TCONS_00006676
CNT2019113	TCONS_00192517		CNT20169030	TCONS_00006675
CNT2019113	TCONS_00192517		CNT20169030	TCONS_00006673
CNT2019113	TCONS_00192522		CNT20169030	TCONS_00133669
CNT2019113	TCONS_00192520		CNT20169030	TCONS_00133667
CNT2019113	TCONS_00192515		CNT20169030	TCONS_00133666
CNT2019113	TCONS_00192515		CNT20169030	TCONS_00133662
CNT2019113	TCONS_00192507		CNT20169030	TCONS_00133661
CNT2019113	TCONS_00192507		CNT20169030	TCONS_00133658
CNT2019113	TCONS_00192504		CNT20169030	TCONS_00006674
CNT2019113	TCONS_00192504		CNT20169030	TCONS_00185267
CNT2019113	TCONS_00192518		CNT20169030	TCONS_00185266
CNT2019113	TCONS_00192518		CNT20169030	TCONS_00185261
CNT2019113	TCONS_00192514		CNT20169030	TCONS_00185259
CNT2019113	TCONS_00192514		CNT20169030	TCONS_00185258
CNT2019113	TCONS_00192506		CNT20169030	TCONS_00133659
CNT2019113	TCONS_00192506		CNT20169030	TCONS_00185264
CNT2019113	TCONS_00192505		CNT20169029	TCONS_00072312
CNT2019113	TCONS_00192505		CNT20169029	TCONS_00072312
CNT2019113	TCONS_00192519		CNT20169029	TCONS_00072312
CNT2019113	TCONS_00192513		CNT20169029	TCONS_00072314
CNT2019113	TCONS_00192513		CNT20169029	TCONS_00072314
CNT2019113	TCONS_00192512		CNT20169029	TCONS_00133662
CNT2019113	TCONS_00192512		CNT20169029	TCONS_00006675
CNT2019113	TCONS_00073348		CNT20169029	TCONS_00133669
CNT2019113	TCONS_00073348		CNT20169029	TCONS_00133661
CNT2019113	TCONS_00073347		CNT20169029	TCONS_00133658
CNT2019113	TCONS_00073347		CNT20169029	TCONS_00104324
CNT2018937	TCONS_00190812		CNT20169029	TCONS_00104323
CNT2018937	TCONS_00190932		CNT20169029	TCONS_00006678
CNT2018849	TCONS_00163407		CNT20169029	TCONS_00006677
CNT2018774	TCONS_00159686		CNT20169029	TCONS_00006676
CNT2018774	TCONS_00159684		CNT20169029	TCONS_00006673
CNT2018774	TCONS_00159687		CNT20169029	TCONS_00133667
CNT2018774	TCONS_00159685		CNT20169029	TCONS_00133666
CNT2018639	TCONS_00120286		CNT20169029	TCONS_00185267
CNT2018639	TCONS_00120285		CNT20169029	TCONS_00185266
CNT2018566	TCONS_00055505		CNT20169029	TCONS_00185261
CNT2018566	TCONS_00055505		CNT20169029	TCONS_00185258
CNT2018566	TCONS_00055504		CNT20169029	TCONS_00185259
CNT2018566	TCONS_00055504		CNT20169029	TCONS_00133659
CNT2018565	TCONS_00055505		CNT20169029	TCONS_00006674
CNT2018565	TCONS_00055505		CNT20169029	TCONS_00185264
CNT2018565	TCONS_00055504		CNT20169029	TCONS_00133665
CNT2018565	TCONS_00055504		CNT20169029	TCONS_00185265
CNT2018564	TCONS_00055505		CNT20169028	TCONS_00072312
CNT2018564	TCONS_00055505		CNT20169028	TCONS_00072312
CNT2018564	TCONS_00055504		CNT20169028	TCONS_00072314
CNT2018564	TCONS_00055504		CNT20169028	TCONS_00072314
CNT2018546	TCONS_00043122		CNT20169028	TCONS_00133662
CNT2018546	TCONS_00043121		CNT20169028	TCONS_00006675
CNT2018413	TCONS_00094921		CNT20169028	TCONS_00133669
CNT2018413	TCONS_00094919		CNT20169028	TCONS_00133661
CNT2018413	TCONS_00094918		CNT20169028	TCONS_00133658
CNT2018383	TCONS_00087988		CNT20169028	TCONS_00104324
CNT2018383	TCONS_00201620		CNT20169028	TCONS_00104323
CNT2018383	TCONS_00201618		CNT20169028	TCONS_00006678
CNT2018322	TCONS_00087988		CNT20169028	TCONS_00006677
CNT2018322	TCONS_00201620		CNT20169028	TCONS_00006676
CNT2018322	TCONS_00201618		CNT20169028	TCONS_00006673
CNT2018286	TCONS_00096797		CNT20169028	TCONS_00133667
CNT2018234	TCONS_00070312		CNT20169028	TCONS_00133666
CNT2018234	TCONS_00070311		CNT20169028	TCONS_00185267
CNT2018185	TCONS_00105977		CNT20169028	TCONS_00185266
CNT2018182	TCONS_00170131		CNT20169028	TCONS_00185261
CNT2018182	TCONS_00170130		CNT20169028	TCONS_00185258
CNT2017898	TCONS_00111656		CNT20169028	TCONS_00185259
CNT2017898	TCONS_00111655		CNT20169028	TCONS_00133659
CNT2017898	TCONS_00111657		CNT20169028	TCONS_00006674
CNT2017898	TCONS_00111660		CNT20169028	TCONS_00185264
CNT2017898	TCONS_00111659		CNT20169028	TCONS_00133665
CNT2017898	TCONS_00111658		CNT20169028	TCONS_00185265
CNT2017885	TCONS_00034874		CNT20169022	TCONS_00074699
CNT2017812	TCONS_00001606		CNT20169022	TCONS_00147770
CNT2017685	TCONS_00099147		CNT20169022	TCONS_00081330
CNT2017621	TCONS_00111656		CNT20169021	TCONS_00200631
CNT2017621	TCONS_00111655		CNT20169021	TCONS_00200631
CNT2017621	TCONS_00111657		CNT20169021	TCONS_00200632
CNT2017621	TCONS_00111660		CNT20169021	TCONS_00200632
CNT2017621	TCONS_00111659		CNT20169021	TCONS_00200630
CNT2017621	TCONS_00111658		CNT20169021	TCONS_00200630
CNT2017602	TCONS_00023714		CNT20169021	TCONS_00013893
CNT2017602	TCONS_00091627		CNT20169021	TCONS_00014006
CNT2017602	TCONS_00091622		CNT20169021	TCONS_00014006
CNT2017602	TCONS_00091616		CNT20169021	TCONS_00007684
CNT2017602	TCONS_00023713		CNT20169021	TCONS_00007684
			CNT20169021	TCONS_00019012
Brassica napus			CNT20169021	TCONS_00019011
CNT20153692	TCONS_00023714		CNT20169021	TCONS_00019010
CNT20152139	TCONS_00023714		CNT20169021	TCONS_00019009
CNT20151983	TCONS_00023714		CNT20169021	TCONS_00019008
CNT20151982	TCONS_00023714		CNT20169021	TCONS_00019006
CNT20143617	TCONS_00023714		CNT20169021	TCONS_00019005
			CNT20169021	TCONS_00019004
Brassica oleracea			CNT20169021	TCONS_00019003
CNT20176372	TCONS_00023714		CNT20169021	TCONS_00132021
			CNT20169021	TCONS_00132021
Brassica rapa			CNT20169021	TCONS_00132022
CNT20120042	TCONS_00023714		CNT20169021	TCONS_00132022
CNT20118072	TCONS_00023714		CNT20169020	TCONS_00200632
			CNT20169020	TCONS_00200632
Chenopodium quinoa			CNT20169020	TCONS_00200631
CNT2055191	TCONS_00178056		CNT20169020	TCONS_00200631
CNT2055191	TCONS_00178057		CNT20169020	TCONS_00200631
			CNT20169020	TCONS_00200630
			CNT20169020	TCONS_00200630
			CNT20169020	TCONS_00200630
			CNT20169020	TCONS_00013893
			CNT20169020	TCONS_00013893
			CNT20169020	TCONS_00014006
			CNT20169020	TCONS_00007684
			CNT20169020	TCONS_00007684
			CNT20169020	TCONS_00019012
			CNT20169020	TCONS_00019011
			CNT20169020	TCONS_00019010
			CNT20169020	TCONS_00019009
			CNT20169020	TCONS_00019008
			CNT20169020	TCONS_00019006
			CNT20169020	TCONS_00019005
			CNT20169020	TCONS_00019004
			CNT20169020	TCONS_00019003
			CNT20169020	TCONS_00132021
			CNT20169020	TCONS_00132021
			CNT20169020	TCONS_00132022
			CNT20169020	TCONS_00132022
			CNT20169019	TCONS_00200630
			CNT20169019	TCONS_00200631
			CNT20169019	TCONS_00200631
			CNT20169019	TCONS_00200632
			CNT20169019	TCONS_00200632
			CNT20169019	TCONS_00013893
			CNT20169019	TCONS_00014006
			CNT20169019	TCONS_00007684
			CNT20169019	TCONS_00019012
			CNT20169019	TCONS_00019011
			CNT20169019	TCONS_00019010
			CNT20169019	TCONS_00019009
			CNT20169019	TCONS_00019008
			CNT20169019	TCONS_00019006
			CNT20169019	TCONS_00019005
			CNT20169019	TCONS_00019004
			CNT20169019	TCONS_00019003
			CNT20169019	TCONS_00132021
			CNT20169019	TCONS_00132021
			CNT20169019	TCONS_00132022
			CNT20169019	TCONS_00132022
			CNT20169017	TCONS_00140920
			CNT20169015	TCONS_00140920
			CNT20169012	TCONS_00114016
			CNT20169012	TCONS_00114016
			CNT20169012	TCONS_00114016
			CNT20169012	TCONS_00114016
			CNT20169012	TCONS_00114016
			CNT20169011	TCONS_00096682
			CNT20169011	TCONS_00096682
			CNT20169011	TCONS_00096682
			CNT20169011	TCONS_00096681
			CNT20169011	TCONS_00096681
			CNT20169011	TCONS_00096681
			CNT20169011	TCONS_00065994
			CNT20169011	TCONS_00065994
			CNT20169011	TCONS_00065994
			CNT20169011	TCONS_00065990
			CNT20169011	TCONS_00096780
			CNT20169011	TCONS_00096779
			CNT20169011	TCONS_00065992
			CNT20169011	TCONS_00191907
			CNT20169011	TCONS_00191907
			CNT20169011	TCONS_00191907
			CNT20169011	TCONS_00191906
			CNT20169011	TCONS_00191906
			CNT20169011	TCONS_00191906
			CNT20169011	TCONS_00191918
			CNT20169009	TCONS_00022266
			CNT20169009	TCONS_00022265
			CNT20169000	TCONS_00038017
			CNT20169000	TCONS_00038017
			CNT20169000	TCONS_00038896
			CNT20169000	TCONS_00038893
			CNT20169000	TCONS_00038892
			CNT20169000	TCONS_00038891
			CNT20169000	TCONS_00038890
			CNT20169000	TCONS_00038889
			CNT20169000	TCONS_00025578
			CNT20169000	TCONS_00199385
			CNT20168999	TCONS_00038017
			CNT20168999	TCONS_00038017
			CNT20168999	TCONS_00038896
			CNT20168999	TCONS_00038893
			CNT20168999	TCONS_00038892
			CNT20168999	TCONS_00038891
			CNT20168999	TCONS_00038890
			CNT20168999	TCONS_00038889
			CNT20168999	TCONS_00025578
			CNT20168999	TCONS_00199385
			CNT20168998	TCONS_00020025
			CNT20168997	TCONS_00038896
			CNT20168997	TCONS_00038893
			CNT20168997	TCONS_00038892
			CNT20168997	TCONS_00038891
			CNT20168997	TCONS_00038890
			CNT20168997	TCONS_00038889
			CNT20168997	TCONS_00025578
			CNT20168997	TCONS_00199385
			CNT20168997	TCONS_00038017
			CNT20168997	TCONS_00038017
			CNT20168996	TCONS_00038017
			CNT20168996	TCONS_00038017
			CNT20168996	TCONS_00038896
			CNT20168996	TCONS_00038893
			CNT20168996	TCONS_00038892
			CNT20168996	TCONS_00038891
			CNT20168996	TCONS_00038890
			CNT20168996	TCONS_00038889
			CNT20168996	TCONS_00025578
			CNT20168996	TCONS_00199385
			CNT20168995	TCONS_00038017
			CNT20168995	TCONS_00038017
			CNT20168995	TCONS_00025578
			CNT20168995	TCONS_00038896
			CNT20168995	TCONS_00038893
			CNT20168995	TCONS_00038892
			CNT20168995	TCONS_00038891
			CNT20168995	TCONS_00038890
			CNT20168995	TCONS_00038889
			CNT20168995	TCONS_00199385
			CNT20168994	TCONS_00038896
			CNT20168994	TCONS_00038893
			CNT20168994	TCONS_00038892
			CNT20168994	TCONS_00038891
			CNT20168994	TCONS_00038890
			CNT20168994	TCONS_00038889
			CNT20168994	TCONS_00025578
			CNT20168994	TCONS_00199385
			CNT20168994	TCONS_00038017
			CNT20168994	TCONS_00038017
			CNT20168993	TCONS_00106722
			CNT20168993	TCONS_00106722
			CNT20168993	TCONS_00106724
			CNT20168993	TCONS_00106724
			CNT20168993	TCONS_00106725
			CNT20168993	TCONS_00106725
			CNT20168993	TCONS_00106725
			CNT20168990	TCONS_00166081
			CNT20168990	TCONS_00024886
			CNT20168990	TCONS_00020025
			CNT20168990	TCONS_00040110
			CNT20168990	TCONS_00024508
			CNT20168990	TCONS_00024507
			CNT20168990	TCONS_00075735
			CNT20168988	TCONS_00014947
			CNT20168988	TCONS_00014948
			CNT20168988	TCONS_00014948
			CNT20168988	TCONS_00085620
			CNT20168988	TCONS_00175633
			CNT20168988	TCONS_00175632
			CNT20168988	TCONS_00175631
			CNT20168988	TCONS_00175630
			CNT20168988	TCONS_00116232
			CNT20168988	TCONS_00065249
			CNT20168988	TCONS_00065248
			CNT20168987	TCONS_00042177
			CNT20168987	TCONS_00042177
			CNT20168987	TCONS_00162314
			CNT20168987	TCONS_00162317
			CNT20168987	TCONS_00162317
			CNT20168987	TCONS_00162316
			CNT20168987	TCONS_00162315
			CNT20168986	TCONS_00167346
			CNT20168986	TCONS_00116232
			CNT20168986	TCONS_00116232
			CNT20168986	TCONS_00085620
			CNT20168986	TCONS_00094937
			CNT20168986	TCONS_00137967
			CNT20168986	TCONS_00137967
			CNT20168986	TCONS_00017954
			CNT20168986	TCONS_00175633
			CNT20168986	TCONS_00175632
			CNT20168986	TCONS_00175631
			CNT20168986	TCONS_00175630
			CNT20168986	TCONS_00017030
			CNT20168986	TCONS_00119782
			CNT20168986	TCONS_00119781
			CNT20168986	TCONS_00197359
			CNT20168986	TCONS_00109235
			CNT20168986	TCONS_00166081
			CNT20168986	TCONS_00048855
			CNT20168986	TCONS_00067784
			CNT20168986	TCONS_00170959
			CNT20168986	TCONS_00170957
			CNT20168986	TCONS_00051651
			CNT20168986	TCONS_00128567
			CNT20168986	TCONS_00039854
			CNT20168986	TCONS_00179964
			CNT20168986	TCONS_00046290
			CNT20168986	TCONS_00182426
			CNT20168986	TCONS_00182425
			CNT20168986	TCONS_00124091
			CNT20168986	TCONS_00075735
			CNT20168986	TCONS_00014902
			CNT20168985	TCONS_00017954
			CNT20168985	TCONS_00109235
			CNT20168985	TCONS_00051651
			CNT20168985	TCONS_00048855
			CNT20168984	TCONS_00197359
			CNT20168984	TCONS_00137967
			CNT20168984	TCONS_00046290
			CNT20168983	TCONS_00112026
			CNT20168983	TCONS_00112025
			CNT20168983	TCONS_00112022
			CNT20168981	TCONS_00020245
			CNT20168981	TCONS_00020245
			CNT20168981	TCONS_00020245
			CNT20168981	TCONS_00020245
			CNT20168981	TCONS_00020244
			CNT20168981	TCONS_00020244
			CNT20168981	TCONS_00020244
			CNT20168981	TCONS_00020244
			CNT20168981	TCONS_00020248
			CNT20168981	TCONS_00020248
			CNT20168981	TCONS_00020248
			CNT20168981	TCONS_00020248
			CNT20168980	TCONS_00020248
			CNT20168980	TCONS_00020248
			CNT20168980	TCONS_00020248
			CNT20168980	TCONS_00020245
			CNT20168980	TCONS_00020245
			CNT20168980	TCONS_00020245
			CNT20168980	TCONS_00020245
			CNT20168980	TCONS_00020244
			CNT20168980	TCONS_00020244
			CNT20168980	TCONS_00020244
			CNT20168980	TCONS_00020244
			CNT20168979	TCONS_00107799
			CNT20168979	TCONS_00107796
			CNT20168978	TCONS_00127550
			CNT20168978	TCONS_00127550
			CNT20168976	TCONS_00003194
			CNT20168976	TCONS_00003193
			CNT20168976	TCONS_00003192
			CNT20168976	TCONS_00003191
			CNT20168976	TCONS_00008860
			CNT20168976	TCONS_00171609
			CNT20168976	TCONS_00100956
			CNT20168976	TCONS_00100955
			CNT20168976	TCONS_00100953
			CNT20168976	TCONS_00100952
			CNT20168976	TCONS_00100951
			CNT20168976	TCONS_00100950
			CNT20168976	TCONS_00100946
			CNT20168975	TCONS_00008860
			CNT20168975	TCONS_00003194
			CNT20168975	TCONS_00003193
			CNT20168975	TCONS_00003192
			CNT20168975	TCONS_00003191
			CNT20168975	TCONS_00171609
			CNT20168975	TCONS_00100956
			CNT20168975	TCONS_00100955
			CNT20168975	TCONS_00100953
			CNT20168975	TCONS_00100952
			CNT20168975	TCONS_00100951
			CNT20168975	TCONS_00100950
			CNT20168975	TCONS_00100946
			CNT20168974	TCONS_00008860
			CNT20168974	TCONS_00003194
			CNT20168974	TCONS_00003193
			CNT20168974	TCONS_00003192
			CNT20168974	TCONS_00003191
			CNT20168970	TCONS_00125877
			CNT20168970	TCONS_00125881
			CNT20168970	TCONS_00125881
			CNT20168970	TCONS_00036829
			CNT20168970	TCONS_00036830
			CNT20168970	TCONS_00125878
			CNT20168970	TCONS_00125878
			CNT20168970	TCONS_00103184
			CNT20168970	TCONS_00103184
			CNT20168969	TCONS_00125881
			CNT20168969	TCONS_00125881
			CNT20168969	TCONS_00036830
			CNT20168969	TCONS_00036830
			CNT20168969	TCONS_00125877
			CNT20168969	TCONS_00125877
			CNT20168969	TCONS_00125877
			CNT20168969	TCONS_00036829
			CNT20168969	TCONS_00036829
			CNT20168969	TCONS_00036829
			CNT20168969	TCONS_00125878
			CNT20168969	TCONS_00125878
			CNT20168969	TCONS_00103184
			CNT20168969	TCONS_00103184
			CNT20168969	TCONS_00103184
			CNT20168963	TCONS_00160484
			CNT20168963	TCONS_00160468
			CNT20168963	TCONS_00160464
			CNT20168963	TCONS_00160482
			CNT20168963	TCONS_00160482
			CNT20168963	TCONS_00160479
			CNT20168963	TCONS_00160477
			CNT20168963	TCONS_00160472
			CNT20168963	TCONS_00160469
			CNT20168963	TCONS_00160469
			CNT20168963	TCONS_00160467
			CNT20168963	TCONS_00160467
			CNT20168963	TCONS_00160466
			CNT20168963	TCONS_00160465
			CNT20168963	TCONS_00160463
			CNT20168963	TCONS_00160459
			CNT20168963	TCONS_00160459
			CNT20168963	TCONS_00160458
			CNT20168963	TCONS_00160458
			CNT20168963	TCONS_00160456
			CNT20168963	TCONS_00160456
			CNT20168963	TCONS_00160449
			CNT20168963	TCONS_00160448
			CNT20168963	TCONS_00160445
			CNT20168963	TCONS_00160445
			CNT20168963	TCONS_00160460
			CNT20168963	TCONS_00160487
			CNT20168963	TCONS_00160486
			CNT20168963	TCONS_00160481
			CNT20168963	TCONS_00160455
			CNT20168963	TCONS_00160480
			CNT20168963	TCONS_00160478
			CNT20168963	TCONS_00160476
			CNT20168963	TCONS_00160462
			CNT20168963	TCONS_00160457
			CNT20168963	TCONS_00160446
			CNT20168956	TCONS_00079517
			CNT20168956	TCONS_00124473
			CNT20168954	TCONS_00105899
			CNT20168954	TCONS_00062360
			CNT20168954	TCONS_00152878
			CNT20168946	TCONS_00087335
			CNT20168946	TCONS_00064250
			CNT20168946	TCONS_00064250
			CNT20168945	TCONS_00003194
			CNT20168945	TCONS_00003194
			CNT20168945	TCONS_00003194
			CNT20168945	TCONS_00003193
			CNT20168945	TCONS_00003193
			CNT20168945	TCONS_00003193
			CNT20168945	TCONS_00003192
			CNT20168945	TCONS_00003192
			CNT20168945	TCONS_00003192
			CNT20168945	TCONS_00003191
			CNT20168945	TCONS_00003191
			CNT20168945	TCONS_00003191
			CNT20168944	TCONS_00173496
			CNT20168944	TCONS_00183880
			CNT20168944	TCONS_00129960
			CNT20168944	TCONS_00129960
			CNT20168944	TCONS_00129962
			CNT20168944	TCONS_00129962
			CNT20168944	TCONS_00034087
			CNT20168944	TCONS_00067875
			CNT20168944	TCONS_00054866
			CNT20168944	TCONS_00199400
			CNT20168944	TCONS_00183172
			CNT20168944	TCONS_00183171
			CNT20168944	TCONS_00199399
			CNT20168944	TCONS_00199397
			CNT20168944	TCONS_00199396
			CNT20168944	TCONS_00045052
			CNT20168944	TCONS_00095162
			CNT20168944	TCONS_00183193
			CNT20168944	TCONS_00024041
			CNT20168944	TCONS_00020801
			CNT20168944	TCONS_00021183
			CNT20168944	TCONS_00022076
			CNT20168944	TCONS_00033346
			CNT20168944	TCONS_00114622
			CNT20168944	TCONS_00129963
			CNT20168944	TCONS_00129961
			CNT20168944	TCONS_00200181
			CNT20168944	TCONS_00124092
			CNT20168944	TCONS_00010010
			CNT20168942	TCONS_00195490
			CNT20168942	TCONS_00102159
			CNT20168939	TCONS_00095162
			CNT20168939	TCONS_00022076
			CNT20168939	TCONS_00054866
			CNT20168939	TCONS_00021183
			CNT20168939	TCONS_00129962
			CNT20168939	TCONS_00129960
			CNT20168939	TCONS_00129963
			CNT20168939	TCONS_00129961
			CNT20168937	TCONS_00150489
			CNT20168937	TCONS_00059546
			CNT20168937	TCONS_00059545
			CNT20168937	TCONS_00059544
			CNT20168937	TCONS_00059543
			CNT20168937	TCONS_00059542
			CNT20168937	TCONS_00173348
			CNT20168937	TCONS_00173347
			CNT20168937	TCONS_00173346
			CNT20168937	TCONS_00173345
			CNT20168937	TCONS_00173344
			CNT20168937	TCONS_00131363
			CNT20168937	TCONS_00131362
			CNT20168937	TCONS_00131361
			CNT20168937	TCONS_00131360
			CNT20168937	TCONS_00131359
			CNT20168937	TCONS_00131358
			CNT20168937	TCONS_00131357
			CNT20168937	TCONS_00131356
			CNT20168937	TCONS_00131287
			CNT20168937	TCONS_00174122
			CNT20168937	TCONS_00199419
			CNT20168937	TCONS_00199418
			CNT20168937	TCONS_00199417
			CNT20168937	TCONS_00199416
			CNT20168937	TCONS_00199415
			CNT20168937	TCONS_00194380
			CNT20168937	TCONS_00105334
			CNT20168937	TCONS_00076647
			CNT20168937	TCONS_00108691
			CNT20168936	TCONS_00048560
			CNT20168936	TCONS_00048560
			CNT20168936	TCONS_00048560
			CNT20168936	TCONS_00048560
			CNT20168936	TCONS_00048560
			CNT20168936	TCONS_00048560
			CNT20168936	TCONS_00048563
			CNT20168936	TCONS_00048563
			CNT20168936	TCONS_00048563
			CNT20168936	TCONS_00048563
			CNT20168936	TCONS_00048563
			CNT20168936	TCONS_00048563
			CNT20168936	TCONS_00050095
			CNT20168936	TCONS_00050095
			CNT20168936	TCONS_00050095
			CNT20168936	TCONS_00050095
			CNT20168936	TCONS_00050095
			CNT20168936	TCONS_00050095
			CNT20168936	TCONS_00048567
			CNT20168936	TCONS_00048567
			CNT20168936	TCONS_00048567
			CNT20168936	TCONS_00048567
			CNT20168936	TCONS_00048567
			CNT20168936	TCONS_00048567
			CNT20168936	TCONS_00048567
			CNT20168936	TCONS_00048559
			CNT20168936	TCONS_00048559
			CNT20168936	TCONS_00048559
			CNT20168936	TCONS_00048559
			CNT20168936	TCONS_00048559
			CNT20168936	TCONS_00048666
			CNT20168936	TCONS_00048562
			CNT20168936	TCONS_00048562
			CNT20168936	TCONS_00048562
			CNT20168936	TCONS_00048562
			CNT20168935	TCONS_00050095
			CNT20168935	TCONS_00050095
			CNT20168935	TCONS_00050095
			CNT20168935	TCONS_00050095
			CNT20168935	TCONS_00050095
			CNT20168935	TCONS_00048559
			CNT20168935	TCONS_00048559
			CNT20168935	TCONS_00048559
			CNT20168935	TCONS_00048559
			CNT20168935	TCONS_00048567
			CNT20168935	TCONS_00048567
			CNT20168935	TCONS_00048567
			CNT20168935	TCONS_00048567
			CNT20168935	TCONS_00048567
			CNT20168935	TCONS_00048567
			CNT20168935	TCONS_00048567
			CNT20168935	TCONS_00048567
			CNT20168935	TCONS_00048560
			CNT20168935	TCONS_00048560
			CNT20168935	TCONS_00048560
			CNT20168935	TCONS_00048560
			CNT20168935	TCONS_00048560
			CNT20168935	TCONS_00048560
			CNT20168935	TCONS_00048560
			CNT20168935	TCONS_00048563
			CNT20168935	TCONS_00048563
			CNT20168935	TCONS_00048563
			CNT20168935	TCONS_00048563
			CNT20168935	TCONS_00048563
			CNT20168935	TCONS_00048563
			CNT20168935	TCONS_00048563
			CNT20168935	TCONS_00048666
			CNT20168935	TCONS_00048562
			CNT20168935	TCONS_00048562
			CNT20168935	TCONS_00048562
			CNT20168935	TCONS_00048562
			CNT20168935	TCONS_00048562
			CNT20168933	TCONS_00078564
			CNT20168930	TCONS_00021076
			CNT20168930	TCONS_00021076
			CNT20168930	TCONS_00021071
			CNT20168930	TCONS_00021071
			CNT20168930	TCONS_00021071
			CNT20168930	TCONS_00021075
			CNT20168930	TCONS_00021075
			CNT20168930	TCONS_00021072
			CNT20168930	TCONS_00021072
			CNT20168930	TCONS_00021070
			CNT20168930	TCONS_00021070
			CNT20168930	TCONS_00021070
			CNT20168930	TCONS_00035697
			CNT20168930	TCONS_00035696
			CNT20168930	TCONS_00035695
			CNT20168930	TCONS_00035694
			CNT20168930	TCONS_00035692
			CNT20168930	TCONS_00035687
			CNT20168927	TCONS_00047750
			CNT20168926	TCONS_00047750
			CNT20168924	TCONS_00194543
			CNT20168924	TCONS_00194542
			CNT20168921	TCONS_00070893
			CNT20168921	TCONS_00104835
			CNT20168921	TCONS_00104834
			CNT20168921	TCONS_00143008
			CNT20168921	TCONS_00103218
			CNT20168921	TCONS_00103217
			CNT20168921	TCONS_00103216
			CNT20168920	TCONS_00070893
			CNT20168920	TCONS_00104835
			CNT20168920	TCONS_00104834
			CNT20168920	TCONS_00143008
			CNT20168920	TCONS_00103218
			CNT20168920	TCONS_00103217
			CNT20168920	TCONS_00103216
			CNT20168919	TCONS_00104394
			CNT20168919	TCONS_00150560
			CNT20168919	TCONS_00150559
			CNT20168919	TCONS_00150558
			CNT20168916	TCONS_00109235
			CNT20168916	TCONS_00051651
			CNT20168916	TCONS_00017954
			CNT20168916	TCONS_00046290
			CNT20168916	TCONS_00079517
			CNT20168916	TCONS_00008651
			CNT20168914	TCONS_00121641
			CNT20168914	TCONS_00121641
			CNT20168914	TCONS_00121641
			CNT20168914	TCONS_00121641
			CNT20168914	TCONS_00121640
			CNT20168914	TCONS_00121640
			CNT20168914	TCONS_00121640
			CNT20168914	TCONS_00121640
			CNT20168914	TCONS_00121639
			CNT20168914	TCONS_00121639
			CNT20168914	TCONS_00121639
			CNT20168914	TCONS_00121639
			CNT20168914	TCONS_00121637
			CNT20168914	TCONS_00121637
			CNT20168914	TCONS_00121637
			CNT20168914	TCONS_00121637
			CNT20168914	TCONS_00173348
			CNT20168914	TCONS_00173346
			CNT20168914	TCONS_00173344
			CNT20168914	TCONS_00173347
			CNT20168914	TCONS_00173345
			CNT20168914	TCONS_00160533
			CNT20168914	TCONS_00160532
			CNT20168913	TCONS_00121637
			CNT20168913	TCONS_00121637
			CNT20168913	TCONS_00121637
			CNT20168913	TCONS_00121641
			CNT20168913	TCONS_00121641
			CNT20168913	TCONS_00121641
			CNT20168913	TCONS_00121641
			CNT20168913	TCONS_00121640
			CNT20168913	TCONS_00121640
			CNT20168913	TCONS_00121640
			CNT20168913	TCONS_00121640
			CNT20168913	TCONS_00121639
			CNT20168913	TCONS_00121639
			CNT20168913	TCONS_00121639
			CNT20168913	TCONS_00121639
			CNT20168913	TCONS_00173348
			CNT20168913	TCONS_00173346
			CNT20168913	TCONS_00173344
			CNT20168913	TCONS_00173347
			CNT20168913	TCONS_00173345
			CNT20168913	TCONS_00160533
			CNT20168913	TCONS_00160532
			CNT20168912	TCONS_00121637
			CNT20168912	TCONS_00121637
			CNT20168912	TCONS_00121637
			CNT20168912	TCONS_00121641
			CNT20168912	TCONS_00121641
			CNT20168912	TCONS_00121641
			CNT20168912	TCONS_00121641
			CNT20168912	TCONS_00121640
			CNT20168912	TCONS_00121640
			CNT20168912	TCONS_00121640
			CNT20168912	TCONS_00121640
			CNT20168912	TCONS_00121639
			CNT20168912	TCONS_00121639
			CNT20168912	TCONS_00121639
			CNT20168912	TCONS_00121639
			CNT20168912	TCONS_00173348
			CNT20168912	TCONS_00173346
			CNT20168912	TCONS_00173344
			CNT20168912	TCONS_00173347
			CNT20168912	TCONS_00173345
			CNT20168912	TCONS_00160533
			CNT20168912	TCONS_00160532
			CNT20168911	TCONS_00070893
			CNT20168911	TCONS_00104835
			CNT20168911	TCONS_00104834
			CNT20168911	TCONS_00143008
			CNT20168908	TCONS_00108955
			CNT20168907	TCONS_00166081
			CNT20168907	TCONS_00024886
			CNT20168907	TCONS_00024508
			CNT20168907	TCONS_00024507
			CNT20168907	TCONS_00075735
			CNT20168907	TCONS_00040110
			CNT20168907	TCONS_00137533
			CNT20168907	TCONS_00137532
			CNT20168907	TCONS_00137531
			CNT20168907	TCONS_00067875
			CNT20168907	TCONS_00020025
			CNT20168907	TCONS_00183172
			CNT20168907	TCONS_00183171
			CNT20168907	TCONS_00150252
			CNT20168907	TCONS_00199399
			CNT20168907	TCONS_00199397
			CNT20168907	TCONS_00199396
			CNT20168907	TCONS_00133136
			CNT20168907	TCONS_00183193
			CNT20168907	TCONS_00024041
			CNT20168907	TCONS_00020801
			CNT20168907	TCONS_00033346
			CNT20168907	TCONS_00104580
			CNT20168907	TCONS_00104579
			CNT20168907	TCONS_00104578
			CNT20168907	TCONS_00021183
			CNT20168907	TCONS_00132011
			CNT20168906	TCONS_00108955
			CNT20168903	TCONS_00103536
			CNT20168903	TCONS_00103536
			CNT20168902	TCONS_00103536
			CNT20168902	TCONS_00103536
			CNT20168881	TCONS_00158535
			CNT20168881	TCONS_00145775
			CNT20168880	TCONS_00199385
			CNT20168880	TCONS_00025578
			CNT20168880	TCONS_00160277
			CNT20168879	TCONS_00167722
			CNT20168879	TCONS_00167722
			CNT20168879	TCONS_00167722
			CNT20168879	TCONS_00167722
			CNT20168879	TCONS_00167718
			CNT20168879	TCONS_00167718
			CNT20168879	TCONS_00167718
			CNT20168879	TCONS_00167718
			CNT20168879	TCONS_00167706
			CNT20168879	TCONS_00167706
			CNT20168879	TCONS_00167706
			CNT20168879	TCONS_00167704
			CNT20168879	TCONS_00167704
			CNT20168879	TCONS_00167704
			CNT20168879	TCONS_00167704
			CNT20168879	TCONS_00167702
			CNT20168879	TCONS_00167702
			CNT20168879	TCONS_00167702
			CNT20168879	TCONS_00167695
			CNT20168879	TCONS_00167695
			CNT20168879	TCONS_00167695
			CNT20168879	TCONS_00167695
			CNT20168879	TCONS_00167700
			CNT20168879	TCONS_00167700
			CNT20168879	TCONS_00167700
			CNT20168879	TCONS_00167700
			CNT20168879	TCONS_00167697
			CNT20168879	TCONS_00167697
			CNT20168879	TCONS_00167697
			CNT20168879	TCONS_00167701
			CNT20168879	TCONS_00167701
			CNT20168879	TCONS_00167701
			CNT20168879	TCONS_00167701
			CNT20168879	TCONS_00167726
			CNT20168879	TCONS_00167726
			CNT20168879	TCONS_00167726
			CNT20168879	TCONS_00167720
			CNT20168879	TCONS_00167720
			CNT20168879	TCONS_00167720
			CNT20168879	TCONS_00167720
			CNT20168879	TCONS_00167723
			CNT20168879	TCONS_00167723
			CNT20168879	TCONS_00167723
			CNT20168879	TCONS_00167723
			CNT20168879	TCONS_00167717
			CNT20168879	TCONS_00167717
			CNT20168879	TCONS_00167717
			CNT20168879	TCONS_00167717
			CNT20168879	TCONS_00167712
			CNT20168879	TCONS_00167712
			CNT20168879	TCONS_00167712
			CNT20168879	TCONS_00167712
			CNT20168879	TCONS_00167705
			CNT20168879	TCONS_00167705
			CNT20168879	TCONS_00167705
			CNT20168879	TCONS_00167705
			CNT20168879	TCONS_00167705
			CNT20168879	TCONS_00167698
			CNT20168879	TCONS_00167698
			CNT20168879	TCONS_00167698
			CNT20168879	TCONS_00167698
			CNT20168879	TCONS_00167698
			CNT20168878	TCONS_00167722
			CNT20168878	TCONS_00167722
			CNT20168878	TCONS_00167722
			CNT20168878	TCONS_00167722
			CNT20168878	TCONS_00167722
			CNT20168878	TCONS_00167718
			CNT20168878	TCONS_00167718
			CNT20168878	TCONS_00167718
			CNT20168878	TCONS_00167718
			CNT20168878	TCONS_00167718
			CNT20168878	TCONS_00167706
			CNT20168878	TCONS_00167706
			CNT20168878	TCONS_00167706
			CNT20168878	TCONS_00167704
			CNT20168878	TCONS_00167704
			CNT20168878	TCONS_00167704
			CNT20168878	TCONS_00167704
			CNT20168878	TCONS_00167704
			CNT20168878	TCONS_00167702
			CNT20168878	TCONS_00167702
			CNT20168878	TCONS_00167702
			CNT20168878	TCONS_00167702
			CNT20168878	TCONS_00167695
			CNT20168878	TCONS_00167695
			CNT20168878	TCONS_00167695
			CNT20168878	TCONS_00167695
			CNT20168878	TCONS_00167695
			CNT20168878	TCONS_00167701
			CNT20168878	TCONS_00167701
			CNT20168878	TCONS_00167701
			CNT20168878	TCONS_00167701
			CNT20168878	TCONS_00167701
			CNT20168878	TCONS_00167700
			CNT20168878	TCONS_00167700
			CNT20168878	TCONS_00167700
			CNT20168878	TCONS_00167700
			CNT20168878	TCONS_00167700
			CNT20168878	TCONS_00167697
			CNT20168878	TCONS_00167697
			CNT20168878	TCONS_00167697
			CNT20168878	TCONS_00167726
			CNT20168878	TCONS_00167726
			CNT20168878	TCONS_00167726
			CNT20168878	TCONS_00167726
			CNT20168878	TCONS_00167720
			CNT20168878	TCONS_00167720
			CNT20168878	TCONS_00167720
			CNT20168878	TCONS_00167720
			CNT20168878	TCONS_00167720
			CNT20168878	TCONS_00167723
			CNT20168878	TCONS_00167723
			CNT20168878	TCONS_00167723
			CNT20168878	TCONS_00167723
			CNT20168878	TCONS_00167723
			CNT20168878	TCONS_00167717
			CNT20168878	TCONS_00167717
			CNT20168878	TCONS_00167717
			CNT20168878	TCONS_00167717
			CNT20168878	TCONS_00167717
			CNT20168878	TCONS_00167712
			CNT20168878	TCONS_00167712
			CNT20168878	TCONS_00167712
			CNT20168878	TCONS_00167712
			CNT20168878	TCONS_00167712
			CNT20168878	TCONS_00167705
			CNT20168878	TCONS_00167705
			CNT20168878	TCONS_00167705
			CNT20168878	TCONS_00167705
			CNT20168878	TCONS_00167705
			CNT20168878	TCONS_00167705
			CNT20168878	TCONS_00167698
			CNT20168878	TCONS_00167698
			CNT20168878	TCONS_00167698
			CNT20168878	TCONS_00167698
			CNT20168878	TCONS_00167698
			CNT20168878	TCONS_00167698
			CNT20168877	TCONS_00158843
			CNT20168877	TCONS_00146097
			CNT20168877	TCONS_00146097
			CNT20168877	TCONS_00179659
			CNT20168872	TCONS_00093955
			CNT20168872	TCONS_00093955
			CNT20168867	TCONS_00077796
			CNT20168867	TCONS_00077795
			CNT20168867	TCONS_00077794
			CNT20168867	TCONS_00077793
			CNT20168862	TCONS_00182116
			CNT20168862	TCONS_00182114
			CNT20168862	TCONS_00038290
			CNT20168862	TCONS_00038288
			CNT20168862	TCONS_00038285
			CNT20168862	TCONS_00038287
			CNT20168861	TCONS_00119149
			CNT20168852	TCONS_00140601
			CNT20168849	TCONS_00011014
			CNT20168848	TCONS_00190385
			CNT20168848	TCONS_00190385
			CNT20168846	TCONS_00017954
			CNT20168846	TCONS_00109235
			CNT20168846	TCONS_00051651
			CNT20168846	TCONS_00197359
			CNT20168846	TCONS_00137967
			CNT20168846	TCONS_00008651
			CNT20168846	TCONS_00046290
			CNT20168846	TCONS_00072104
			CNT20168846	TCONS_00072103
			CNT20168846	TCONS_00079517
			CNT20168845	TCONS_00133120
			CNT20168845	TCONS_00133116
			CNT20168845	TCONS_00133114
			CNT20168845	TCONS_00133111
			CNT20168845	TCONS_00133110
			CNT20168845	TCONS_00133109
			CNT20168826	TCONS_00202580
			CNT20168825	TCONS_00014846
			CNT20168825	TCONS_00014845
			CNT20168825	TCONS_00067708
			CNT20168824	TCONS_00078257
			CNT20168824	TCONS_00078257
			CNT20168823	TCONS_00194759
			CNT20168823	TCONS_00194759
			CNT20168823	TCONS_00187535
			CNT20168817	TCONS_00025578
			CNT20168817	TCONS_00199385
			CNT20168817	TCONS_00194565
			CNT20168817	TCONS_00194561
			CNT20168817	TCONS_00060166
			CNT20168817	TCONS_00060165
			CNT20168817	TCONS_00060164
			CNT20168817	TCONS_00135026
			CNT20168817	TCONS_00135024
			CNT20168816	TCONS_00025578
			CNT20168816	TCONS_00199385
			CNT20168816	TCONS_00194565
			CNT20168816	TCONS_00194561
			CNT20168816	TCONS_00060166
			CNT20168816	TCONS_00060165
			CNT20168816	TCONS_00060164
			CNT20168816	TCONS_00135026
			CNT20168816	TCONS_00135024
			CNT20168815	TCONS_00025578
			CNT20168815	TCONS_00199385
			CNT20168815	TCONS_00194565
			CNT20168815	TCONS_00194561
			CNT20168815	TCONS_00060166
			CNT20168815	TCONS_00060165
			CNT20168815	TCONS_00060164
			CNT20168815	TCONS_00135026
			CNT20168815	TCONS_00135024
			CNT20168813	TCONS_00109235
			CNT20168813	TCONS_00017954
			CNT20168813	TCONS_00048855
			CNT20168813	TCONS_00051651
			CNT20168813	TCONS_00182426
			CNT20168813	TCONS_00182425
			CNT20168813	TCONS_00046290
			CNT20168812	TCONS_00090043
			CNT20168812	TCONS_00090043
			CNT20168812	TCONS_00090043
			CNT20168812	TCONS_00090042
			CNT20168812	TCONS_00090042
			CNT20168812	TCONS_00090041
			CNT20168812	TCONS_00090041
			CNT20168812	TCONS_00008580
			CNT20168812	TCONS_00008580
			CNT20168812	TCONS_00008582
			CNT20168812	TCONS_00008582
			CNT20168812	TCONS_00090038
			CNT20168812	TCONS_00090038
			CNT20168812	TCONS_00090037
			CNT20168812	TCONS_00090037
			CNT20168812	TCONS_00090046
			CNT20168812	TCONS_00090046
			CNT20168812	TCONS_00199385
			CNT20168812	TCONS_00025578
			CNT20168812	TCONS_00052738
			CNT20168812	TCONS_00052733
			CNT20168812	TCONS_00052731
			CNT20168812	TCONS_00052728
			CNT20168812	TCONS_00052727
			CNT20168810	TCONS_00152386
			CNT20168810	TCONS_00102824
			CNT20168810	TCONS_00102824
			CNT20168810	TCONS_00102825
			CNT20168810	TCONS_00045667
			CNT20168810	TCONS_00045666
			CNT20168810	TCONS_00049927
			CNT20168810	TCONS_00043626
			CNT20168809	TCONS_00090043
			CNT20168809	TCONS_00090043
			CNT20168809	TCONS_00090043
			CNT20168809	TCONS_00090043
			CNT20168809	TCONS_00008580
			CNT20168809	TCONS_00008580
			CNT20168809	TCONS_00008582
			CNT20168809	TCONS_00008582
			CNT20168809	TCONS_00008582
			CNT20168809	TCONS_00090038
			CNT20168809	TCONS_00090038
			CNT20168809	TCONS_00090037
			CNT20168809	TCONS_00090037
			CNT20168809	TCONS_00090042
			CNT20168809	TCONS_00090042
			CNT20168809	TCONS_00090042
			CNT20168809	TCONS_00090041
			CNT20168809	TCONS_00090041
			CNT20168809	TCONS_00090041
			CNT20168809	TCONS_00199385
			CNT20168809	TCONS_00025578
			CNT20168809	TCONS_00090046
			CNT20168809	TCONS_00090046
			CNT20168809	TCONS_00052738
			CNT20168809	TCONS_00052733
			CNT20168809	TCONS_00052731
			CNT20168809	TCONS_00052728
			CNT20168809	TCONS_00052727
			CNT20168807	TCONS_00164504
			CNT20168807	TCONS_00066195
			CNT20168807	TCONS_00164516
			CNT20168806	TCONS_00164504
			CNT20168806	TCONS_00066195
			CNT20168806	TCONS_00164516
			CNT20168805	TCONS_00079517
			CNT20168805	TCONS_00094937
			CNT20168805	TCONS_00175633
			CNT20168805	TCONS_00175632
			CNT20168805	TCONS_00175631
			CNT20168805	TCONS_00175630
			CNT20168805	TCONS_00098610
			CNT20168805	TCONS_00098608
			CNT20168805	TCONS_00116232
			CNT20168805	TCONS_00072104
			CNT20168805	TCONS_00072103
			CNT20168804	TCONS_00164504
			CNT20168804	TCONS_00066195
			CNT20168804	TCONS_00164516
			CNT20168802	TCONS_00164504
			CNT20168802	TCONS_00066195
			CNT20168802	TCONS_00164516
			CNT20168800	TCONS_00017954
			CNT20168800	TCONS_00051651
			CNT20168800	TCONS_00109235
			CNT20168800	TCONS_00008651
			CNT20168796	TCONS_00145132
			CNT20168796	TCONS_00145131
			CNT20168796	TCONS_00145130
			CNT20168796	TCONS_00145129
			CNT20168796	TCONS_00145127
			CNT20168796	TCONS_00145126
			CNT20168796	TCONS_00145124
			CNT20168796	TCONS_00145123
			CNT20168796	TCONS_00145122
			CNT20168796	TCONS_00145120
			CNT20168796	TCONS_00145118
			CNT20168796	TCONS_00145117
			CNT20168796	TCONS_00145125
			CNT20168792	TCONS_00067723
			CNT20168792	TCONS_00067723
			CNT20168792	TCONS_00067725
			CNT20168792	TCONS_00067725
			CNT20168792	TCONS_00067726
			CNT20168792	TCONS_00067726
			CNT20168792	TCONS_00067721
			CNT20168792	TCONS_00067721
			CNT20168792	TCONS_00067721
			CNT20168792	TCONS_00067729
			CNT20168792	TCONS_00067729
			CNT20168792	TCONS_00067729
			CNT20168792	TCONS_00067728
			CNT20168792	TCONS_00067728
			CNT20168792	TCONS_00067728
			CNT20168792	TCONS_00067727
			CNT20168792	TCONS_00067727
			CNT20168792	TCONS_00067727
			CNT20168792	TCONS_00067724
			CNT20168792	TCONS_00067724
			CNT20168792	TCONS_00067724
			CNT20168790	TCONS_00147770
			CNT20168790	TCONS_00081330
			CNT20168789	TCONS_00172580
			CNT20168788	TCONS_00111179
			CNT20168788	TCONS_00111179
			CNT20168788	TCONS_00111182
			CNT20168788	TCONS_00111182
			CNT20168788	TCONS_00111181
			CNT20168788	TCONS_00111181
			CNT20168788	TCONS_00111180
			CNT20168788	TCONS_00111180
			CNT20168788	TCONS_00111178
			CNT20168788	TCONS_00111178
			CNT20168788	TCONS_00111177
			CNT20168788	TCONS_00111177
			CNT20168788	TCONS_00111176
			CNT20168788	TCONS_00111176
			CNT20168788	TCONS_00034034
			CNT20168788	TCONS_00034032
			CNT20168788	TCONS_00030136
			CNT20168787	TCONS_00111179
			CNT20168787	TCONS_00111179
			CNT20168787	TCONS_00111182
			CNT20168787	TCONS_00111182
			CNT20168787	TCONS_00111181
			CNT20168787	TCONS_00111181
			CNT20168787	TCONS_00111180
			CNT20168787	TCONS_00111180
			CNT20168787	TCONS_00111178
			CNT20168787	TCONS_00111178
			CNT20168787	TCONS_00111177
			CNT20168787	TCONS_00111177
			CNT20168787	TCONS_00111176
			CNT20168787	TCONS_00111176
			CNT20168787	TCONS_00034034
			CNT20168787	TCONS_00034032
			CNT20168787	TCONS_00030136
			CNT20168786	TCONS_00125153
			CNT20168782	TCONS_00046466
			CNT20168782	TCONS_00046465
			CNT20168782	TCONS_00055031
			CNT20168782	TCONS_00055030
			CNT20168782	TCONS_00033299
			CNT20168782	TCONS_00033298
			CNT20168782	TCONS_00033297
			CNT20168782	TCONS_00033294
			CNT20168782	TCONS_00033293
			CNT20168782	TCONS_00055032
			CNT20168782	TCONS_00039860
			CNT20168782	TCONS_00055034
			CNT20168780	TCONS_00191748
			CNT20168780	TCONS_00158886
			CNT20168776	TCONS_00064993
			CNT20168775	TCONS_00064993
			CNT20168773	TCONS_00164820
			CNT20168772	TCONS_00093832
			CNT20168772	TCONS_00039872
			CNT20168771	TCONS_00101489
			CNT20168770	TCONS_00083948
			CNT20168770	TCONS_00083948
			CNT20168770	TCONS_00083947
			CNT20168770	TCONS_00083947
			CNT20168770	TCONS_00084001
			CNT20168768	TCONS_00039003
			CNT20168768	TCONS_00188815
			CNT20168766	TCONS_00039003
			CNT20168764	TCONS_00146395
			CNT20168764	TCONS_00146399
			CNT20168764	TCONS_00146390
			CNT20168764	TCONS_00146397
			CNT20168764	TCONS_00146391
			CNT20168764	TCONS_00146391
			CNT20168764	TCONS_00146396
			CNT20168764	TCONS_00146396
			CNT20168764	TCONS_00146393
			CNT20168764	TCONS_00146393
			CNT20168764	TCONS_00146392
			CNT20168764	TCONS_00146392
			CNT20168764	TCONS_00146389
			CNT20168764	TCONS_00146389
			CNT20168764	TCONS_00146398
			CNT20168764	TCONS_00146398
			CNT20168764	TCONS_00146398
			CNT20168764	TCONS_00146394
			CNT20168764	TCONS_00146394
			CNT20168764	TCONS_00146400
			CNT20168763	TCONS_00039003
			CNT20168763	TCONS_00188815
			CNT20168761	TCONS_00137290
			CNT20168761	TCONS_00137289
			CNT20168761	TCONS_00137292
			CNT20168758	TCONS_00031219
			CNT20168756	TCONS_00147770
			CNT20168751	TCONS_00104033
			CNT20168751	TCONS_00104032
			CNT20168751	TCONS_00104031
			CNT20168751	TCONS_00104028
			CNT20168751	TCONS_00120525
			CNT20168751	TCONS_00120517
			CNT20168751	TCONS_00120516
			CNT20168751	TCONS_00055336
			CNT20168751	TCONS_00055334
			CNT20168751	TCONS_00055332
			CNT20168751	TCONS_00055331
			CNT20168751	TCONS_00117876
			CNT20168751	TCONS_00117875
			CNT20168751	TCONS_00117874
			CNT20168751	TCONS_00117872
			CNT20168751	TCONS_00117869
			CNT20168751	TCONS_00117868
			CNT20168751	TCONS_00117867
			CNT20168751	TCONS_00117865
			CNT20168751	TCONS_00117864
			CNT20168750	TCONS_00104031
			CNT20168750	TCONS_00104028
			CNT20168750	TCONS_00104032
			CNT20168750	TCONS_00139078
			CNT20168750	TCONS_00139080
			CNT20168750	TCONS_00139080
			CNT20168750	TCONS_00139080
			CNT20168750	TCONS_00139079
			CNT20168750	TCONS_00139079
			CNT20168750	TCONS_00139079
			CNT20168750	TCONS_00139077
			CNT20168750	TCONS_00139076
			CNT20168745	TCONS_00128567
			CNT20168745	TCONS_00018428
			CNT20168745	TCONS_00018426
			CNT20168745	TCONS_00018425
			CNT20168745	TCONS_00125359
			CNT20168745	TCONS_00017954
			CNT20168745	TCONS_00175633
			CNT20168745	TCONS_00175632
			CNT20168745	TCONS_00175631
			CNT20168745	TCONS_00175630
			CNT20168745	TCONS_00196791
			CNT20168738	TCONS_00097228
			CNT20168736	TCONS_00162317
			CNT20168736	TCONS_00162316
			CNT20168736	TCONS_00162315
			CNT20168736	TCONS_00162314
			CNT20168734	TCONS_00072423
			CNT20168734	TCONS_00072422
			CNT20168734	TCONS_00072422
			CNT20168734	TCONS_00072421
			CNT20168734	TCONS_00072421
			CNT20168734	TCONS_00012499
			CNT20168734	TCONS_00012498
			CNT20168734	TCONS_00072300
			CNT20168729	TCONS_00008497
			CNT20168729	TCONS_00008495
			CNT20168729	TCONS_00008496
			CNT20168727	TCONS_00125359
			CNT20168720	TCONS_00124030
			CNT20168720	TCONS_00095162
			CNT20168720	TCONS_00034087
			CNT20168720	TCONS_00104580
			CNT20168720	TCONS_00104579
			CNT20168720	TCONS_00104578
			CNT20168720	TCONS_00164489
			CNT20168720	TCONS_00164488
			CNT20168720	TCONS_00022076
			CNT20168720	TCONS_00183880
			CNT20168720	TCONS_00183172
			CNT20168720	TCONS_00183171
			CNT20168720	TCONS_00129963
			CNT20168720	TCONS_00129962
			CNT20168720	TCONS_00129961
			CNT20168720	TCONS_00129960
			CNT20168720	TCONS_00183879
			CNT20168720	TCONS_00102779
			CNT20168719	TCONS_00197984
			CNT20168718	TCONS_00167346
			CNT20168718	TCONS_00175633
			CNT20168718	TCONS_00175632
			CNT20168718	TCONS_00175631
			CNT20168718	TCONS_00175630
			CNT20168718	TCONS_00116232
			CNT20168718	TCONS_00116232
			CNT20168718	TCONS_00094937
			CNT20168718	TCONS_00085620
			CNT20168718	TCONS_00137967
			CNT20168718	TCONS_00137967
			CNT20168718	TCONS_00017954
			CNT20168718	TCONS_00072104
			CNT20168718	TCONS_00072103
			CNT20168718	TCONS_00116481
			CNT20168718	TCONS_00116480
			CNT20168718	TCONS_00109235
			CNT20168718	TCONS_00051651
			CNT20168718	TCONS_00202359
			CNT20168718	TCONS_00060719
			CNT20168718	TCONS_00039854
			CNT20168718	TCONS_00008651
			CNT20168718	TCONS_00048855
			CNT20168718	TCONS_00124091
			CNT20168718	TCONS_00182426
			CNT20168718	TCONS_00182425
			CNT20168717	TCONS_00017954
			CNT20168717	TCONS_00109235
			CNT20168717	TCONS_00051651
			CNT20168717	TCONS_00008651
			CNT20168717	TCONS_00048855
			CNT20168717	TCONS_00182426
			CNT20168717	TCONS_00182425
			CNT20168715	TCONS_00104394
			CNT20168713	TCONS_00179659
			CNT20168713	TCONS_00179659
			CNT20168713	TCONS_00179659
			CNT20168713	TCONS_00158843
			CNT20168713	TCONS_00158843
			CNT20168713	TCONS_00158843
			CNT20168713	TCONS_00146226
			CNT20168713	TCONS_00146226
			CNT20168713	TCONS_00146226
			CNT20168712	TCONS_00179659
			CNT20168712	TCONS_00158843
			CNT20168712	TCONS_00146226
			CNT20168709	TCONS_00087801
			CNT20168708	TCONS_00094937
			CNT20168708	TCONS_00175633
			CNT20168708	TCONS_00175633
			CNT20168708	TCONS_00175632
			CNT20168708	TCONS_00175632
			CNT20168708	TCONS_00175631
			CNT20168708	TCONS_00175631
			CNT20168708	TCONS_00175630
			CNT20168708	TCONS_00175630
			CNT20168708	TCONS_00167346
			CNT20168708	TCONS_00072104
			CNT20168708	TCONS_00072103
			CNT20168705	TCONS_00059456
			CNT20168704	TCONS_00020025
			CNT20168703	TCONS_00020025
			CNT20168701	TCONS_00087088
			CNT20168701	TCONS_00087086
			CNT20168701	TCONS_00087086
			CNT20168701	TCONS_00087090
			CNT20168701	TCONS_00087090
			CNT20168701	TCONS_00087089
			CNT20168701	TCONS_00087089
			CNT20168701	TCONS_00087087
			CNT20168701	TCONS_00087087
			CNT20168699	TCONS_00038017
			CNT20168699	TCONS_00038017
			CNT20168699	TCONS_00025578
			CNT20168699	TCONS_00038896
			CNT20168699	TCONS_00038893
			CNT20168699	TCONS_00038892
			CNT20168699	TCONS_00038891
			CNT20168699	TCONS_00038890
			CNT20168699	TCONS_00038889
			CNT20168699	TCONS_00199385
			CNT20168695	TCONS_00201552
			CNT20168695	TCONS_00034056
			CNT20168692	TCONS_00074699
			CNT20168692	TCONS_00154901
			CNT20168692	TCONS_00147770
			CNT20168692	TCONS_00116232
			CNT20168692	TCONS_00072302
			CNT20168692	TCONS_00066795
			CNT20168692	TCONS_00067784
			CNT20168692	TCONS_00017030
			CNT20168692	TCONS_00124091
			CNT20168691	TCONS_00012774
			CNT20168690	TCONS_00104169
			CNT20168690	TCONS_00012775
			CNT20168690	TCONS_00103536
			CNT20168689	TCONS_00087893
			CNT20168689	TCONS_00189679
			CNT20168689	TCONS_00189679
			CNT20168688	TCONS_00034319
			CNT20168688	TCONS_00034318
			CNT20168688	TCONS_00068129
			CNT20168688	TCONS_00068128
			CNT20168688	TCONS_00068122
			CNT20168688	TCONS_00114498
			CNT20168688	TCONS_00114498
			CNT20168688	TCONS_00114495
			CNT20168688	TCONS_00114494
			CNT20168688	TCONS_00114494
			CNT20168688	TCONS_00114493
			CNT20168688	TCONS_00114493
			CNT20168688	TCONS_00114491
			CNT20168688	TCONS_00114490
			CNT20168688	TCONS_00114489
			CNT20168688	TCONS_00114489
			CNT20168688	TCONS_00114487
			CNT20168688	TCONS_00114484
			CNT20168688	TCONS_00114484
			CNT20168688	TCONS_00114481
			CNT20168688	TCONS_00114481
			CNT20168688	TCONS_00114478
			CNT20168688	TCONS_00114477
			CNT20168688	TCONS_00114476
			CNT20168688	TCONS_00114476
			CNT20168688	TCONS_00034323
			CNT20168688	TCONS_00034320
			CNT20168688	TCONS_00034317
			CNT20168688	TCONS_00034314
			CNT20168688	TCONS_00114486
			CNT20168688	TCONS_00114486
			CNT20168688	TCONS_00114480
			CNT20168688	TCONS_00114480
			CNT20168688	TCONS_00034322
			CNT20168688	TCONS_00034321
			CNT20168688	TCONS_00068133
			CNT20168688	TCONS_00068132
			CNT20168688	TCONS_00068131
			CNT20168688	TCONS_00068126
			CNT20168688	TCONS_00068130
			CNT20168688	TCONS_00068127
			CNT20168688	TCONS_00068124
			CNT20168688	TCONS_00068123
			CNT20168688	TCONS_00068121
			CNT20168688	TCONS_00114496
			CNT20168688	TCONS_00114475
			CNT20168688	TCONS_00114497
			CNT20168688	TCONS_00114485
			CNT20168688	TCONS_00114488
			CNT20168688	TCONS_00114474
			CNT20168688	TCONS_00086274
			CNT20168687	TCONS_00118820
			CNT20168681	TCONS_00035109
			CNT20168681	TCONS_00035109
			CNT20168681	TCONS_00035109
			CNT20168681	TCONS_00035109
			CNT20168681	TCONS_00035109
			CNT20168681	TCONS_00035109
			CNT20168681	TCONS_00035114
			CNT20168681	TCONS_00035113
			CNT20168681	TCONS_00161249
			CNT20168673	TCONS_00008860
			CNT20168673	TCONS_00100953
			CNT20168673	TCONS_00100952
			CNT20168673	TCONS_00100951
			CNT20168673	TCONS_00100950
			CNT20168673	TCONS_00100946
			CNT20168672	TCONS_00013576
			CNT20168671	TCONS_00117867
			CNT20168671	TCONS_00117867
			CNT20168671	TCONS_00117867
			CNT20168671	TCONS_00117872
			CNT20168671	TCONS_00117872
			CNT20168671	TCONS_00117872
			CNT20168671	TCONS_00117872
			CNT20168671	TCONS_00117875
			CNT20168671	TCONS_00117875
			CNT20168671	TCONS_00117875
			CNT20168671	TCONS_00117875
			CNT20168671	TCONS_00117874
			CNT20168671	TCONS_00117874
			CNT20168671	TCONS_00117874
			CNT20168671	TCONS_00117874
			CNT20168671	TCONS_00117876
			CNT20168671	TCONS_00117876
			CNT20168671	TCONS_00117876
			CNT20168671	TCONS_00117865
			CNT20168671	TCONS_00117868
			CNT20168671	TCONS_00117868
			CNT20168671	TCONS_00117868
			CNT20168671	TCONS_00117868
			CNT20168671	TCONS_00117869
			CNT20168671	TCONS_00117869
			CNT20168671	TCONS_00117869
			CNT20168671	TCONS_00117869
			CNT20168671	TCONS_00117864
			CNT20168671	TCONS_00095324
			CNT20168671	TCONS_00095322
			CNT20168671	TCONS_00095321
			CNT20168671	TCONS_00095320
			CNT20168671	TCONS_00095319
			CNT20168671	TCONS_00071633
			CNT20168671	TCONS_00071630
			CNT20168671	TCONS_00071628
			CNT20168670	TCONS_00200141
			CNT20168670	TCONS_00038896
			CNT20168670	TCONS_00038893
			CNT20168670	TCONS_00038892
			CNT20168670	TCONS_00038891
			CNT20168670	TCONS_00038890
			CNT20168670	TCONS_00038889
			CNT20168670	TCONS_00025578
			CNT20168670	TCONS_00199385
			CNT20168670	TCONS_00196690
			CNT20168663	TCONS_00014948
			CNT20168663	TCONS_00014947
			CNT20168660	TCONS_00007720
			CNT20168660	TCONS_00007719
			CNT20168658	TCONS_00008860
			CNT20168658	TCONS_00100953
			CNT20168658	TCONS_00100952
			CNT20168658	TCONS_00100951
			CNT20168658	TCONS_00100950
			CNT20168658	TCONS_00100946
			CNT20168657	TCONS_00020025
			CNT20168657	TCONS_00103842
			CNT20168657	TCONS_00103841
			CNT20168657	TCONS_00021364
			CNT20168654	TCONS_00113129
			CNT20168653	TCONS_00113129
			CNT20168652	TCONS_00113129
			CNT20168651	TCONS_00020008
			CNT20168645	TCONS_00039574
			CNT20168645	TCONS_00039574
			CNT20168645	TCONS_00039574
			CNT20168645	TCONS_00039574
			CNT20168645	TCONS_00039574
			CNT20168645	TCONS_00039575
			CNT20168645	TCONS_00039575
			CNT20168645	TCONS_00039575
			CNT20168645	TCONS_00039575
			CNT20168645	TCONS_00039575
			CNT20168645	TCONS_00039573
			CNT20168645	TCONS_00039573
			CNT20168645	TCONS_00039573
			CNT20168645	TCONS_00039573
			CNT20168645	TCONS_00039573
			CNT20168645	TCONS_00039573
			CNT20168643	TCONS_00081190
			CNT20168643	TCONS_00081190
			CNT20168643	TCONS_00081191
			CNT20168643	TCONS_00081191
			CNT20168643	TCONS_00081189
			CNT20168643	TCONS_00081189
			CNT20168643	TCONS_00081188
			CNT20168643	TCONS_00081188
			CNT20168643	TCONS_00081186
			CNT20168643	TCONS_00081186
			CNT20168643	TCONS_00081187
			CNT20168642	TCONS_00081190
			CNT20168642	TCONS_00081190
			CNT20168642	TCONS_00081191
			CNT20168642	TCONS_00081191
			CNT20168642	TCONS_00081189
			CNT20168642	TCONS_00081189
			CNT20168642	TCONS_00081188
			CNT20168642	TCONS_00081188
			CNT20168642	TCONS_00081186
			CNT20168642	TCONS_00081186
			CNT20168642	TCONS_00081187
			CNT20168641	TCONS_00081191
			CNT20168641	TCONS_00081190
			CNT20168641	TCONS_00081189
			CNT20168641	TCONS_00081189
			CNT20168641	TCONS_00081188
			CNT20168641	TCONS_00081188
			CNT20168641	TCONS_00081186
			CNT20168641	TCONS_00081186
			CNT20168641	TCONS_00081187
			CNT20168639	TCONS_00022493
			CNT20168639	TCONS_00022296
			CNT20168638	TCONS_00022296
			CNT20168633	TCONS_00005370
			CNT20168633	TCONS_00005369
			CNT20168633	TCONS_00177299
			CNT20168633	TCONS_00177298
			CNT20168633	TCONS_00177296
			CNT20168633	TCONS_00177295
			CNT20168633	TCONS_00177294
			CNT20168633	TCONS_00177293
			CNT20168633	TCONS_00177291
			CNT20168633	TCONS_00005368
			CNT20168633	TCONS_00186769
			CNT20168633	TCONS_00186768
			CNT20168633	TCONS_00186764
			CNT20168633	TCONS_00186763
			CNT20168633	TCONS_00186761
			CNT20168633	TCONS_00186760
			CNT20168633	TCONS_00171042
			CNT20168633	TCONS_00186765
			CNT20168633	TCONS_00121426
			CNT20168633	TCONS_00121426
			CNT20168632	TCONS_00082650
			CNT20168632	TCONS_00002064
			CNT20168632	TCONS_00002065
			CNT20168632	TCONS_00002066
			CNT20168632	TCONS_00167076
			CNT20168632	TCONS_00167075
			CNT20168632	TCONS_00167077
			CNT20168632	TCONS_00187794
			CNT20168631	TCONS_00017954
			CNT20168631	TCONS_00109235
			CNT20168631	TCONS_00051651
			CNT20168631	TCONS_00048855
			CNT20168628	TCONS_00061059
			CNT20168628	TCONS_00149025
			CNT20168627	TCONS_00121637
			CNT20168627	TCONS_00121640
			CNT20168627	TCONS_00121641
			CNT20168627	TCONS_00121639
			CNT20168627	TCONS_00032529
			CNT20168627	TCONS_00032528
			CNT20168627	TCONS_00173347
			CNT20168627	TCONS_00173345
			CNT20168627	TCONS_00173348
			CNT20168627	TCONS_00173346
			CNT20168627	TCONS_00173344
			CNT20168627	TCONS_00160533
			CNT20168627	TCONS_00160532
			CNT20168624	TCONS_00116232
			CNT20168624	TCONS_00154901
			CNT20168624	TCONS_00167346
			CNT20168624	TCONS_00166051
			CNT20168624	TCONS_00154903
			CNT20168623	TCONS_00156031
			CNT20168623	TCONS_00156030
			CNT20168623	TCONS_00156029
			CNT20168623	TCONS_00096033
			CNT20168622	TCONS_00197359
			CNT20168622	TCONS_00046290
			CNT20168622	TCONS_00137967
			CNT20168620	TCONS_00167044
			CNT20168611	TCONS_00040110
			CNT20168611	TCONS_00183171
			CNT20168611	TCONS_00166081
			CNT20168611	TCONS_00024886
			CNT20168611	TCONS_00075735
			CNT20168611	TCONS_00024508
			CNT20168611	TCONS_00024507
			CNT20168611	TCONS_00150252
			CNT20168611	TCONS_00183172
			CNT20168611	TCONS_00183172
			CNT20168611	TCONS_00020025
			CNT20168611	TCONS_00067875
			CNT20168611	TCONS_00199399
			CNT20168611	TCONS_00133136
			CNT20168611	TCONS_00199397
			CNT20168611	TCONS_00199396
			CNT20168611	TCONS_00183173
			CNT20168608	TCONS_00038893
			CNT20168608	TCONS_00038892
			CNT20168608	TCONS_00038891
			CNT20168608	TCONS_00038890
			CNT20168608	TCONS_00038889
			CNT20168608	TCONS_00038896
			CNT20168607	TCONS_00151217
			CNT20168607	TCONS_00151218
			CNT20168607	TCONS_00151218
			CNT20168607	TCONS_00151219
			CNT20168607	TCONS_00151216
			CNT20168607	TCONS_00151216
			CNT20168606	TCONS_00151218
			CNT20168606	TCONS_00151218
			CNT20168606	TCONS_00151217
			CNT20168606	TCONS_00151217
			CNT20168606	TCONS_00151216
			CNT20168606	TCONS_00151216
			CNT20168606	TCONS_00151219
			CNT20168606	TCONS_00151219
			CNT20168605	TCONS_00113484
			CNT20168605	TCONS_00122530
			CNT20168604	TCONS_00161326
			CNT20168604	TCONS_00161326
			CNT20168604	TCONS_00080326
			CNT20168604	TCONS_00080326
			CNT20168603	TCONS_00068882
			CNT20168603	TCONS_00068883
			CNT20168603	TCONS_00068883
			CNT20168599	TCONS_00167346
			CNT20168599	TCONS_00137967
			CNT20168599	TCONS_00137967
			CNT20168599	TCONS_00116232
			CNT20168599	TCONS_00109235
			CNT20168599	TCONS_00051651
			CNT20168599	TCONS_00197359
			CNT20168599	TCONS_00046290
			CNT20168599	TCONS_00008651
			CNT20168597	TCONS_00160858
			CNT20168597	TCONS_00160858
			CNT20168596	TCONS_00041122
			CNT20168581	TCONS_00137869
			CNT20168580	TCONS_00066245
			CNT20168580	TCONS_00066245
			CNT20168580	TCONS_00066244
			CNT20168580	TCONS_00066244
			CNT20168578	TCONS_00003194
			CNT20168578	TCONS_00003194
			CNT20168578	TCONS_00003193
			CNT20168578	TCONS_00003193
			CNT20168578	TCONS_00003192
			CNT20168578	TCONS_00003192
			CNT20168578	TCONS_00003191
			CNT20168578	TCONS_00003191
			CNT20168575	TCONS_00015871
			CNT20168573	TCONS_00040309
			CNT20168572	TCONS_00133136
			CNT20168566	TCONS_00122422
			CNT20168566	TCONS_00122423
			CNT20168566	TCONS_00038903
			CNT20168566	TCONS_00038902
			CNT20168566	TCONS_00134939
			CNT20168561	TCONS_00051651
			CNT20168561	TCONS_00017954
			CNT20168561	TCONS_00109235
			CNT20168561	TCONS_00197359
			CNT20168561	TCONS_00137967
			CNT20168561	TCONS_00046290
			CNT20168561	TCONS_00008651
			CNT20168560	TCONS_00079517
			CNT20168560	TCONS_00197359
			CNT20168560	TCONS_00046290
			CNT20168555	TCONS_00054059
			CNT20168555	TCONS_00054063
			CNT20168555	TCONS_00054063
			CNT20168555	TCONS_00054051
			CNT20168555	TCONS_00054051
			CNT20168555	TCONS_00054029
			CNT20168555	TCONS_00054029
			CNT20168555	TCONS_00054029
			CNT20168555	TCONS_00054029
			CNT20168555	TCONS_00054028
			CNT20168555	TCONS_00054028
			CNT20168555	TCONS_00054028
			CNT20168555	TCONS_00054028
			CNT20168555	TCONS_00054018
			CNT20168555	TCONS_00054018
			CNT20168555	TCONS_00054018
			CNT20168555	TCONS_00054018
			CNT20168555	TCONS_00054013
			CNT20168555	TCONS_00054013
			CNT20168555	TCONS_00054013
			CNT20168555	TCONS_00054013
			CNT20168555	TCONS_00054024
			CNT20168555	TCONS_00054024
			CNT20168555	TCONS_00054024
			CNT20168555	TCONS_00054024
			CNT20168555	TCONS_00054024
			CNT20168555	TCONS_00054022
			CNT20168555	TCONS_00054022
			CNT20168555	TCONS_00054022
			CNT20168555	TCONS_00054022
			CNT20168555	TCONS_00054007
			CNT20168555	TCONS_00054007
			CNT20168555	TCONS_00054007
			CNT20168555	TCONS_00054007
			CNT20168555	TCONS_00054047
			CNT20168555	TCONS_00054047
			CNT20168555	TCONS_00054047
			CNT20168555	TCONS_00054047
			CNT20168555	TCONS_00054066
			CNT20168555	TCONS_00054066
			CNT20168555	TCONS_00054055
			CNT20168555	TCONS_00054055
			CNT20168555	TCONS_00054055
			CNT20168555	TCONS_00054032
			CNT20168555	TCONS_00054032
			CNT20168555	TCONS_00054032
			CNT20168555	TCONS_00054032
			CNT20168555	TCONS_00054041
			CNT20168555	TCONS_00054041
			CNT20168555	TCONS_00054041
			CNT20168555	TCONS_00054039
			CNT20168555	TCONS_00054039
			CNT20168555	TCONS_00054039
			CNT20168555	TCONS_00054039
			CNT20168555	TCONS_00054039
			CNT20168555	TCONS_00054067
			CNT20168555	TCONS_00054067
			CNT20168555	TCONS_00054067
			CNT20168555	TCONS_00054067
			CNT20168555	TCONS_00054067
			CNT20168555	TCONS_00054067
			CNT20168555	TCONS_00054061
			CNT20168555	TCONS_00054061
			CNT20168555	TCONS_00054061
			CNT20168555	TCONS_00054061
			CNT20168555	TCONS_00054061
			CNT20168555	TCONS_00054065
			CNT20168555	TCONS_00054065
			CNT20168555	TCONS_00054065
			CNT20168555	TCONS_00054064
			CNT20168555	TCONS_00054064
			CNT20168555	TCONS_00054064
			CNT20168555	TCONS_00054064
			CNT20168555	TCONS_00054062
			CNT20168555	TCONS_00054062
			CNT20168555	TCONS_00054062
			CNT20168555	TCONS_00054062
			CNT20168555	TCONS_00054062
			CNT20168555	TCONS_00054060
			CNT20168555	TCONS_00054060
			CNT20168555	TCONS_00054060
			CNT20168555	TCONS_00054060
			CNT20168555	TCONS_00054053
			CNT20168555	TCONS_00054053
			CNT20168555	TCONS_00054053
			CNT20168555	TCONS_00054050
			CNT20168555	TCONS_00054050
			CNT20168555	TCONS_00054050
			CNT20168555	TCONS_00054050
			CNT20168555	TCONS_00054031
			CNT20168555	TCONS_00054031
			CNT20168555	TCONS_00054031
			CNT20168555	TCONS_00054030
			CNT20168555	TCONS_00054030
			CNT20168555	TCONS_00054030
			CNT20168555	TCONS_00054030
			CNT20168555	TCONS_00054019
			CNT20168555	TCONS_00054019
			CNT20168555	TCONS_00054019
			CNT20168555	TCONS_00054019
			CNT20168555	TCONS_00054019
			CNT20168555	TCONS_00054017
			CNT20168555	TCONS_00054017
			CNT20168555	TCONS_00054017
			CNT20168555	TCONS_00054017
			CNT20168555	TCONS_00054017
			CNT20168555	TCONS_00054017
			CNT20168555	TCONS_00054016
			CNT20168555	TCONS_00054016
			CNT20168555	TCONS_00054016
			CNT20168555	TCONS_00054016
			CNT20168555	TCONS_00054016
			CNT20168555	TCONS_00054015
			CNT20168555	TCONS_00054015
			CNT20168555	TCONS_00054015
			CNT20168555	TCONS_00054015
			CNT20168555	TCONS_00054015
			CNT20168555	TCONS_00054015
			CNT20168555	TCONS_00054006
			CNT20168555	TCONS_00054006
			CNT20168555	TCONS_00054006
			CNT20168555	TCONS_00054006
			CNT20168555	TCONS_00054006
			CNT20168555	TCONS_00054006
			CNT20168555	TCONS_00054069
			CNT20168555	TCONS_00054069
			CNT20168555	TCONS_00054069
			CNT20168555	TCONS_00054069
			CNT20168555	TCONS_00054069
			CNT20168555	TCONS_00054069
			CNT20168555	TCONS_00054056
			CNT20168555	TCONS_00054056
			CNT20168555	TCONS_00054056
			CNT20168555	TCONS_00054056
			CNT20168555	TCONS_00054056
			CNT20168555	TCONS_00054056
			CNT20168555	TCONS_00054042
			CNT20168555	TCONS_00054042
			CNT20168555	TCONS_00054042
			CNT20168555	TCONS_00054042
			CNT20168555	TCONS_00054042
			CNT20168555	TCONS_00054049
			CNT20168555	TCONS_00054049
			CNT20168555	TCONS_00054049
			CNT20168555	TCONS_00054049
			CNT20168555	TCONS_00054049
			CNT20168555	TCONS_00054049
			CNT20168555	TCONS_00054045
			CNT20168555	TCONS_00054045
			CNT20168555	TCONS_00054045
			CNT20168555	TCONS_00054045
			CNT20168555	TCONS_00054045
			CNT20168555	TCONS_00054076
			CNT20168555	TCONS_00054076
			CNT20168555	TCONS_00054076
			CNT20168555	TCONS_00054076
			CNT20168555	TCONS_00054058
			CNT20168555	TCONS_00054058
			CNT20168555	TCONS_00054058
			CNT20168555	TCONS_00054058
			CNT20168555	TCONS_00054058
			CNT20168555	TCONS_00054046
			CNT20168555	TCONS_00054046
			CNT20168555	TCONS_00054046
			CNT20168555	TCONS_00054046
			CNT20168555	TCONS_00054070
			CNT20168555	TCONS_00054070
[truncated: 36,452 more rows]
[truncated: 4 more columns]
