# Supplementary material for: Transcriptome Screening of Long Noncoding RNAs and Their Target Protein-Coding Genes Unmasks a Dynamic Portrait of Seed Coat Coloration Associated with Anthocyanins in Tibetan Hulless Barley
Source: Int J Mol Sci. 2023 Jun 24;24(13):10587. doi: 10.3390/ijms241310587 (PMC10341697; doi:10.3390/ijms241310587)
Supplement: Supplementary file 1 [file ijms-24-10587-s001.zip › Table S6. FPKM values of 9414 lncRNAs in Tibetan hulless barley seed coats.xlsx]

## Sheet: Table S6. The FPKM value of 941
Table S6. FPKM values of 9414 lncRNAs in Tibetan hulless barley seed coats.
lncRNA	WC1	WC2	WC3	PC1	PC2	PC3
TCONS_00000111	0.237142	0.0125248	0.582832	0.679779	8.94e-05	0.384385
TCONS_00000167	64.8998	69.7095	46.3007	55.2744	63.7577	75.0138
TCONS_00000186	1.76685	2.74696	3.0885	3.17009	1.40854	2.58283
TCONS_00000248	0.489165	0.15778	0.502201	0.0645385	0.45058	0.231572
TCONS_00000249	1.43032	0.231009	2.78486	2.8724	0.963039	1.25428
TCONS_00000293	0.16628	0.182647	0.0524721	1.23944	0.328145	0.166877
TCONS_00000299	8.65901	0.748422	2.41275	5.70606	2.9978	3.34671
TCONS_00000328	0	0	0	0.449489	0.731386	0.815855
TCONS_00000330	0.594591	0.128144	0.918393	0.345052	1.90727	0.259027
TCONS_00000331	0.135715	0.0677076	0.261105	0.831096	0.217536	0
TCONS_00000360	0.00280597	0.00492591	0.00197324	0.004416	0.263836	0.559993
TCONS_00000361	0.0612904	0.323742	0.397074	0.59804	0.602773	0.674774
TCONS_00000410	86.7888	122.113	107.085	75.4189	99.5014	92.8163
TCONS_00000595	1.67238	1.4493	0.622257	3.11837	3.95263	3.35039
TCONS_00000596	2.17524	0.608217	1.18933	0.0774551	6.45e-05	0.103555
TCONS_00000597	4.70002	3.96485	1.92595	0.300763	1.61355	0.428404
TCONS_00000598	2.57845	2.15337	2.02645	0.12519	0.103497	0.0220099
TCONS_00000599	2.13277	1.53312	1.70733	2.6177	1.59032	2.16579
TCONS_00000601	0.0945043	0.686632	0.547336	0.183311	0.000639432	0.088975
TCONS_00000606	3.59635	5.10099	2.48793	2.41123	4.7078	7.50142
TCONS_00000607	5.48965	6.75231	11.6346	11.2411	12.933	12.2899
TCONS_00000618	0	0	0	0.0715028	0.768076	0
TCONS_00000639	2.70734	3.08648	2.40775	2.26883	1.33786	0.702211
TCONS_00000658	15.9057	8.19741	33.1508	10.9239	15.1089	8.03126
TCONS_00000661	0	0	0	10.7102	12.8045	13.5967
TCONS_00000662	0	0	0	15.9066	22.1225	26.3366
TCONS_00000663	0.740288	0.0299763	0.000178793	4.77858	0.688939	4.50527
TCONS_00000664	1.25561	0.625244	1.06206	0.000115956	0.735955	0.000180579
TCONS_00000665	14.4947	13.0509	18.5703	1.65356	1.19514	1.94334
TCONS_00000666	0	0	0	11.515	11.8545	12.557
TCONS_00000757	0	0	0	0.885554	0.413508	0.10857
TCONS_00000795	0	0.110483	1.16075	0	0.543026	0
TCONS_00000798	0	0	0	1.00809	1.57995	1.54516
TCONS_00000799	0	0	0	4.8044	7.10687	6.40725
TCONS_00000800	10.7151	0	0	0	0.789403	0
TCONS_00000801	0.166472	2.91103	16.799	0	2.8551	9.05473
TCONS_00001035	4.06903	17.9199	5.64264	1.02125	0.910349	0.10553
TCONS_00001044	37.3868	74.8549	67.2459	22.4525	38.5736	83.1828
TCONS_00001118	15.2565	10.3816	6.36389	8.86272	6.42023	40.15
TCONS_00001136	0.155467	0.336845	0.15843	1.03465	1.13235	0.270743
TCONS_00001161	8.95614	4.79226	3.81992	5.70194	5.23191	3.81303
TCONS_00001175	0.655595	0	0	0	0	0
TCONS_00001180	0.383	0.958956	0.455105	0.281079	0.260236	0.69371
TCONS_00001181	1.05951	1.01827	0.414154	0.698627	1.99712	1.20176
TCONS_00001182	3.92743	3.62578	2.48579	2.97191	1.56205	1.9183
TCONS_00001342	0	0	0.026674	10.8305	10.0098	7.00645
TCONS_00001348	0	0	0	2.84142	0.42425	3.29359
TCONS_00001349	0	0	0	6.82404	8.94458	1.69676
TCONS_00001350	0	0	0	51.8764	38.2581	25.1014
TCONS_00001364	5.64316	6.3592	5.6826	3.24668	2.87975	1.14129
TCONS_00001395	9.86103	76.551	283.049	4.14909	50.4885	52.6297
TCONS_00001584	0.14733	0.0491797	0.102501	0.802012	0.0176531	0.133918
TCONS_00001600	0.124037	0.519548	0	0	0.831809	0.127408
TCONS_00001603	0	0	0	28.3181	25.4178	21.551
TCONS_00001604	0	0	0	0.539929	2.50267	1.46804
TCONS_00001605	0	0	0	0.937865	2.77582	1.20627
TCONS_00001606	0.731612	0.940142	0.292448	1.39224	0.707315	0.299569
TCONS_00001607	0.165371	0.532838	0.148849	0.0379611	2.20948	0.291636
TCONS_00001608	0	0.114569	0.202427	0.0599417	1.07396	0.445674
TCONS_00001609	0	0	0	0.116501	0.573801	1.14329
TCONS_00001610	0	0.135526	0.177493	0	0.564313	1.33217
TCONS_00001611	0	0.0930105	0.707581	0.0889063	5.52149	4.16021
TCONS_00001612	0.440776	1.1283	0.838619	1.32023	0.485601	0.421053
TCONS_00001613	5.91959	4.23228	4.55357	5.72493	7.12776	7.60211
TCONS_00001614	1.05088	1.11152	0.4088	1.5184	2.40041	1.26462
TCONS_00001615	0.0438013	0.23117	0.281771	0.604221	0.531017	0.31618
TCONS_00001650	0.514809	0.650233	0.685295	0.598719	0.924738	0.777432
TCONS_00001817	0.382013	1.10218	0.522081	0.371515	0.0640284	0.189622
TCONS_00001865	0.76157	4.88966	5.0511	0.339679	3.43151	20.2509
TCONS_00001902	0	0	0	0.963892	1.93781	0.599533
TCONS_00001903	0	0	0	1.36187	0.784289	0.100892
TCONS_00001904	0	0	0	1.14852	1.69521	1.2231
TCONS_00001954	2.46414	2.26647	0.00315095	4.67491	0.816723	2.61296
TCONS_00001955	0.000120254	0	0.510107	0.232246	0.17929	0.214949
TCONS_00001992	0	0	0	0.994366	0.919516	1.44642
TCONS_00001993	0	0.549526	0.259718	0.0647598	1.86243	0.338815
TCONS_00001994	0	0	0	0.933212	0.505918	1.33906
TCONS_00001996	0.452082	0.5187	0.32832	0.683819	1.0553	0.560194
TCONS_00001998	38.5408	29.6822	39.4436	21.9293	7.67246	9.28038
TCONS_00002000	1.13987	0.636849	1.03314	1.95459	0	0.212281
TCONS_00002001	0.809104	5.60109	0	0	0	0
TCONS_00002002	2.03965	4.76987	0	0	0.803771	0
TCONS_00002003	0.189339	0.708618	1.82085	0.705556	2.43655	1.44714
TCONS_00002004	0	0	0	1.27303	1.15153	1.24123
TCONS_00002064	0.148578	0.0736635	0.810009	0.0541954	0.194342	0
TCONS_00002065	0.785973	9.32095	4.00661	10.4906	3.96706	2.97575
TCONS_00002066	1.50046	0.853054	0.834861	1.30586	1.11442	0.880836
TCONS_00002210	0.873074	0.331534	1.33795	0.237692	0.165092	0.0654153
TCONS_00002211	0.147233	0.131485	2.3919	1.40333	1.13972	2.99676
TCONS_00002212	0.512569	0	0.0234954	0.161114	0	0
TCONS_00002266	3.52836	2.40018	0.569175	0	0	0.455416
TCONS_00002267	1.75825	2.08263	3.5221	2.20073	1.8818	0.954652
TCONS_00002388	421.476	355.134	356.334	526.2	257.31	327.001
TCONS_00002472	0.278833	0.642065	0.246387	0.555021	0.273809	0.115279
TCONS_00002474	0.385744	0.157934	0.059683	0.689862	0.417429	0.533722
TCONS_00002475	0.299074	0.53363	0.569992	0.246956	0.647711	0.670017
TCONS_00002477	0.435816	0.227846	0.136957	0.1872	0.117092	0.00052153
TCONS_00002479	0.380488	0.047609	0.717202	0.169782	1.17316	0.611615
TCONS_00002531	0.610567	0.42151	0.271332	0.604639	0.189062	0.85033
TCONS_00002552	0.00257751	0	0.187025	0.473699	0.081823	1.95424
TCONS_00002560	0	3.91661	1.61169	0	0	1.47759
TCONS_00002562	0	0	0	2.72396	1.30972	0.610872
TCONS_00002563	0.293533	0.720414	0.862168	0.615215	1.15499	0.782884
TCONS_00002564	3.09227	2.49116	1.20228	3.27324	3.03555	2.40133
TCONS_00002677	0	0	0.0326175	1.32438	2.4642	0.709568
TCONS_00002819	0.88764	1.3967	0.550544	0.0238765	1.14153	0.119412
TCONS_00002820	0.954203	0.00121166	0.921926	1.20429	0.637751	0.309729
TCONS_00002821	0.424053	0.0804875	1.41e-05	0.074232	0	6.26e-05
TCONS_00002822	0.000844691	0.164627	0.0450713	0.172042	0	0.108298
TCONS_00002823	1.25118	1.3624	1.40486	1.33094	1.47657	1.54644
TCONS_00002824	13.0022	4.55206	7.02126	0.00330424	0.399397	0.0821065
TCONS_00002825	370.925	88.2145	84.5108	0.0743463	2.61962	0.453415
TCONS_00002932	1.51639	1.14457	3.48429	5.46297	4.12629	3.50385
TCONS_00002933	0.147365	0.258191	2.05985	0.265297	0	0.308966
TCONS_00002934	0.216295	0.743158	0.815931	0.475804	0.684903	0.772274
TCONS_00002935	22.391	28.7541	36.394	39.9719	43.6647	28.2737
TCONS_00002936	0.188093	0.0363745	0.103396	0.387336	0.297913	0.427893
TCONS_00003076	6.74672	8.18479	4.26164	4.88727	5.50356	8.4505
TCONS_00003119	3.65e-05	0.157737	0.0452984	0.582666	1.38738	0.695141
TCONS_00003120	0	1.15859	0.000138903	0.156181	0.0801264	0.968968
TCONS_00003129	0.186361	0.16815	0.0707932	0.263715	0.165326	0.52615
TCONS_00003175	2.14828	0.132349	3.29847	1.68994	0.773727	0.682568
TCONS_00003191	1.24104	1.25291	0.962633	1.00299	0.906194	0.0415223
TCONS_00003192	0.0934595	0.646303	0.383963	0.309614	0.00122051	0.449735
TCONS_00003193	14.1893	8.85434	8.60059	15.1816	12.9892	11.0877
TCONS_00003194	6.98973	6.05131	5.19425	10.1258	11.4333	9.95495
TCONS_00003320	0	7.4538	0	0.312682	0.974402	0
TCONS_00003321	0	0.883477	0.441989	0	0	0
TCONS_00003322	0	2.91292	0	0	0	0
TCONS_00003323	1.57479	2.10303	3.38095	2.02758	1.81324	2.45987
TCONS_00003324	0.182584	0.0961837	0.484293	0.0291142	0.0523585	0.745423
TCONS_00003377	0	0.0419944	0.687102	0.10166	0.219791	0.566906
TCONS_00003378	0.361364	0.0338677	0.135969	0.175365	0.177011	0.0327612
TCONS_00003479	2.67266	2.59561	2.02799	3.47022	3.18063	3.00824
TCONS_00003484	0.924256	0.352179	0.164371	0.225769	0.146126	0.243246
TCONS_00003573	1.1682	1.37423	1.17968	1.26704	1.24546	1.36404
TCONS_00003575	3.60834	1.45409	0.509169	4.70409	11.9971	24.9813
TCONS_00003576	0	0	0	0.936908	0.150987	0
TCONS_00003578	4.1212	0	0	0.712029	0.443399	0.509754
TCONS_00003653	2.50277	2.35778	5.65575	1.14532	1.69928	0.985711
TCONS_00003654	4.29229	3.41348	6.97255	1.28643	1.26915	2.00514
TCONS_00003655	0.658475	0.0415549	0.15985	0.352614	0.263717	0.157049
TCONS_00003665	0.177851	0.178043	0.480212	0.0929637	0	0.451893
TCONS_00003666	1.9987	0.867142	0.877908	2.09172	2.33318	1.29235
TCONS_00003667	0.122869	0.254752	0.226978	0.567162	0.00902506	0.0891778
TCONS_00003668	0	2.8e-05	0	0.195397	0.0650292	0.00488767
TCONS_00003669	0.597881	0.569108	0.384259	0.908238	0.777894	0.58944
TCONS_00003670	1.06646	1.09287	1.18427	0.49084	1.29422	2.07636
TCONS_00003671	0.465038	0.353347	2.68e-05	0.0326577	0.670765	0.128866
TCONS_00003673	0	3.25e-05	0.0470969	0.320991	0	0.334536
TCONS_00003674	0.0794606	0.122066	0.108322	0.213811	0.823398	0.25212
TCONS_00003678	0.0668826	0	0.0202414	0.124946	0.00495358	0
TCONS_00003679	0.356077	0.544006	0.00151952	1.17068	0.368275	0
TCONS_00003703	0.381226	0.386041	0.0138413	0.149014	0.318381	0.494208
TCONS_00003705	0.343192	0.00565624	0.130173	0.225908	0.145609	0.0315716
TCONS_00003745	0	0	0	0.206959	0.0064914	0.00351684
TCONS_00003746	2.40155	0.710716	0.547308	0.505681	0.634377	0.436287
TCONS_00003776	0	0	0	6.6974	1.03659	3.13265
TCONS_00003884	0	0	0	3.50161	3.51877	0
TCONS_00003939	0.13532	0.28528	0.56853	0.92106	0	0.203726
TCONS_00003949	0.144963	0.219117	0.294733	0.588217	1.89065	0.194329
TCONS_00003961	0	0.000180245	0	0.190618	0	0.296473
TCONS_00003965	0.240828	0.370228	0.318262	0.163476	0.12383	0.769822
TCONS_00003966	0.310108	0.315605	0.51804	0.96369	1.98641	0.492314
TCONS_00003967	0.579737	0.767044	0.637408	0.777042	0.669775	0.832075
TCONS_00003969	3.73997	5.5958	3.56212	4.80271	4.51621	2.19725
TCONS_00003970	1.86449	1.02565	0.579578	2.22585	0.872839	1.01613
TCONS_00003982	21.0657	14.6046	14.6189	11.6352	19.857	13.4747
TCONS_00003986	0.418742	0.794862	0.920774	0.763789	0.306806	0.0808943
TCONS_00003987	5.62191	7.40491	4.45704	6.9832	4.88557	2.774
TCONS_00004028	1.40601	0.882143	0.478373	0.156841	0.346249	0.23323
TCONS_00004059	0	0	0	4.27647	9.915	5.3441
TCONS_00004210	0.562408	0	0.0525767	0.244044	0.0522363	0.0243406
TCONS_00004211	0.704185	0	0.543313	0.273239	1.06988	0.0680429
TCONS_00004212	0.85754	0	0.221197	0.228393	1.17832	0.0141834
TCONS_00004239	7.61381	10.4062	14.2777	10.0256	7.95329	10.4766
TCONS_00004266	1.49943	0.944379	1.34496	2.63366	1.32975	0.29752
TCONS_00004267	0.144425	0.156263	3.13585	0.961495	0.264452	0
TCONS_00004268	0.112347	0.792069	0.470473	0.181294	0.506059	0.168014
TCONS_00004269	0.450209	0.644228	0.733143	0.127525	0.348406	0.963393
TCONS_00004270	0	0.455839	0	1.45902	0	0
TCONS_00004273	0	0.155196	0.335571	0	0	1.17313
TCONS_00004274	1.58712	0.202146	0.257374	0	0	0
TCONS_00004275	0.552218	0.925569	0.453324	0	0	0
TCONS_00004276	0	0	0	2.84895	3.37275	2.87076
TCONS_00004279	0	0	0	0.497769	0.283527	0.197783
TCONS_00004342	2.88359	2.89139	1.93819	3.65395	2.01071	2.13921
TCONS_00004364	0.380977	2.71905	2.05394	0.875731	3.51797	0.890262
TCONS_00004365	0	4.28e-05	5.22e-05	0	0.000317684	0.916136
TCONS_00004366	23.48	20.3612	14.9696	23.7418	16.6379	19.944
TCONS_00004367	3.66862	0.68009	0.89152	2.00778	1.18575	1.24512
TCONS_00004368	5.7863	2.28834	2.21441	8.56444	1.95542	2.68955
TCONS_00004369	0	1.26137	0	0.121963	0.185736	0.0804895
TCONS_00004439	0.0507894	0	0	0.591579	1.3714	0.452213
TCONS_00004459	0.25646	0.703559	0.555756	0.178902	0.245138	0.175826
TCONS_00004460	1.26313	0.443069	0.503001	0.293986	0.262586	0.0234803
TCONS_00004559	0.132585	0.0441747	0.860036	0	0.151289	0.0472313
TCONS_00004688	0.496892	0.202776	0.318743	0.59421	0.15548	0.481542
TCONS_00004689	0.660129	0.92522	0.848579	1.4795	0.920862	0.426718
TCONS_00004724	0.715781	0	0.211983	0.497095	1.65695	0.487428
TCONS_00004965	0	0	0	21.7808	24.1883	13.2539
TCONS_00004967	0	0	0	0	2.29198	0.108725
TCONS_00004968	0.09983	0	0	1.46932	0	0.946498
TCONS_00004969	0	0.0869363	0	0.0823952	1.25304	0
TCONS_00004971	0	2.47018	0	0	8.83292	0
TCONS_00004972	0.284903	0.452986	0.136573	0.871478	0.94063	1.28291
TCONS_00004974	1.69077	4.13909	2.57514	3.36554	1.99448	0.267828
TCONS_00004976	0.288547	1.48551	0	0.305229	0	0
TCONS_00004980	3.29655	2.49784	3.90432	3.50124	2.02114	1.89273
TCONS_00005026	0	0	0	0.148885	0	0
TCONS_00005027	0.197821	0.110811	0.274403	0.182824	0	1.52e-05
TCONS_00005028	0	1.47e-05	0.0601673	0.181187	0	4.73e-05
TCONS_00005029	0.00128612	0	0.0366245	0.434738	0.19737	0
TCONS_00005031	2.88541	1.62272	1.15871	2.5263	2.03876	1.26721
TCONS_00005032	0	0.13845	0.164579	0.150511	0.135887	0
TCONS_00005033	0.696174	0.398419	0.10444	0.45017	0.264106	0.151435
TCONS_00005034	9.13e-05	0.0511575	0.342119	0.240322	5.04e-05	0.326287
TCONS_00005035	0.000503997	0.0595504	0.241979	0.137238	0.25516	0
TCONS_00005036	0	0.281696	0.20228	0.226882	0.164834	0
TCONS_00005037	0.133839	0.192347	0.465503	0.087719	0.118208	0.0943245
TCONS_00005038	2.31e-05	0	0	0.291317	0	0.0478199
TCONS_00005040	1.54821	0.301149	0.444244	1.25316	1.32678	0.847109
TCONS_00005042	0.664287	0.932753	0.439909	0.445532	1.06774	0.631014
TCONS_00005043	0	0.247246	0.0959443	0.270245	0	0
TCONS_00005045	0.00037544	0.31653	0.0926708	0.0517137	0.0417575	1.16573
TCONS_00005046	0.141212	0.89689	0.40456	0.355702	0.472399	0.193811
TCONS_00005157	0.477508	0.63333	1.35366	0.958766	0.136339	0.331275
TCONS_00005158	0.352743	0.055701	0.312394	0.252903	1.25312	0.083085
TCONS_00005314	0.579737	0.689661	0.530606	0.407456	0.324974	0.484402
TCONS_00005368	36.3932	38.6268	37.1953	35.7508	31.723	38.2185
TCONS_00005369	0.177465	0.18799	0.148816	0.177826	0.096458	1.20168
TCONS_00005370	1.85424	1.24595	1.30889	1.90179	1.8291	1.51684
TCONS_00005376	0	0	0.27079	1.66772	0.3358	0.220431
TCONS_00005385	4.0983	3.18747	1.30774	1.45089	1.7754	0.92409
TCONS_00005405	0.148555	0.129941	0.0447236	0.786866	0.183306	0.120517
TCONS_00005407	0.846837	0.53662	1.09906	1.0103	1.06266	1.08313
TCONS_00005410	0	0	0.163199	0.44011	0.571109	0.38246
TCONS_00005412	0.107154	0.1114	1.07007	0.18278	0.294573	0.152895
TCONS_00005413	0.388144	0	2.21468	0	0	0
TCONS_00005414	0.322875	0.567167	0.0353006	0.103064	0.0579986	0.890693
TCONS_00005415	0	0	0	0.779213	0.164402	0
TCONS_00005416	1.24939	0	0	0.235923	0.153996	0.308589
TCONS_00005417	0.0540931	0.293777	0	0.0602396	0.962752	0
TCONS_00005518	2.6951	0.615008	0	0.537178	0.278866	0.436086
TCONS_00005892	0.00021181	0.0161627	0	0.285529	0.242105	0.209863
TCONS_00005893	0	0	0	1.01462	0.997229	0.365676
TCONS_00005902	0.289976	0	0	0.37537	0.0874825	0.781371
TCONS_00005903	4.77755	9.09491	14.2909	6.05826	4.82338	10.1133
TCONS_00005904	3.31539	4.26422	10.9314	2.06116	2.63123	8.20277
TCONS_00005911	9.96252	12.4008	7.70533	12.4273	6.05045	6.17126
TCONS_00005912	5.12145	2.25921	2.74856	1.82114	3.45102	1.70532
TCONS_00005913	0.113888	0	0	0	0	0.984626
TCONS_00005914	0	1.82875	0	0	0	0
TCONS_00005916	0	0.104695	0.210864	0.0540577	0.379836	0.0468064
TCONS_00005917	0.826022	0.121205	0.955246	0.0994197	0.187352	0
TCONS_00005919	0.14261	0.325108	1.30672	0.0577996	1.23923	1.006
TCONS_00005921	0.465624	0.0695373	0.0823822	0.525831	0.427649	0.399419
TCONS_00005923	1.44865	1.81998	1.79173	1.46184	1.5667	1.61469
TCONS_00005971	15.3087	15.4736	10.5667	13.1953	9.17381	17.364
TCONS_00006072	0	0	0	0.0707864	0.0630912	0
TCONS_00006085	0.149271	8.17e-05	0	0.16707	0.000698344	0.0603271
TCONS_00006088	0.1737	1.18501	0.207521	0.556565	0.475698	0
TCONS_00006089	0.0051789	0.126154	0.0960606	0.101814	0.0405854	0
TCONS_00006090	0	0	0	0.0920942	0	0
TCONS_00006093	0.338876	0.388915	0.0650876	0.985065	1.30593	0.277242
TCONS_00006098	0.275784	1.00944	0.357967	0.422216	0	0.500075
TCONS_00006099	0.625343	0.377465	0.365682	0.584798	0.529672	1.13293
TCONS_00006100	1.30747	0.661086	0.291934	1.19715	0.869579	0.959289
TCONS_00006101	0.186905	0.2323	0.166328	0.0679353	0.152951	0.113744
TCONS_00006102	0.606664	0.21022	0.556335	0.793554	0.4373	0.22576
TCONS_00006103	0.127068	0	0	0.0693116	8.56e-05	0.667325
TCONS_00006104	0.123652	0.18796	0.192778	0.156751	0.505156	0.863741
TCONS_00006105	0.193426	0.823314	0.313595	2.06463	0.561312	0
TCONS_00006107	0.109606	0	0.274489	0.406139	0.154166	0.000317377
TCONS_00006108	0.589919	1.16e-05	0.0917405	0.331913	0.126958	0
TCONS_00006110	0.190387	0	0.0236139	0.147368	0.0556092	0.00062766
TCONS_00006111	0.427194	0.283042	0.208608	0.113643	0	1.19674
TCONS_00006112	0.44127	0.703005	0.300396	0.0197058	0.000315038	7.29e-05
TCONS_00006114	0.0231761	0	0	0.252189	2.07e-05	0.395176
TCONS_00006198	0.286879	0.65059	0.355661	0.805213	0.804596	0.204552
TCONS_00006199	1.03307	0.176401	0.762346	0.0864564	0.00697606	0.843111
TCONS_00006200	0.543795	0.00690139	0.15519	0.323264	0.315486	0.30736
TCONS_00006433	0.0626719	0.394938	1.60415	0.20264	0.967407	1.95365
TCONS_00006536	0.0834637	1.33057	0.372638	1.19023	1.655	0.777044
TCONS_00006537	0.636196	0.578185	0.55434	1.20778	1.41694	0.919409
TCONS_00006538	0.025488	0.0582089	0.0843084	0.464352	0.547376	0.220299
TCONS_00006618	0	0.602218	0.755953	0.385841	1.19026	0.569965
TCONS_00006619	1.22958	1.79815	0.604972	1.30086	3.46228	0.462698
TCONS_00006622	0	0	0.335831	0.189685	0	1.1211
TCONS_00006623	0	22.8181	6.33523	2.99248	1.33548	0
TCONS_00006629	0	0.0852325	0.502868	0	0.969233	0
TCONS_00006631	0.444596	0	0	0	6.80968	0.312998
TCONS_00006632	0.121643	0	0	1.51763	0	0
TCONS_00006633	0.221508	1.78027	1.6205	6.23201	0	0
TCONS_00006635	0.24272	0.513884	0.919966	0.76991	1.13952	0.200451
TCONS_00006669	1.11349	1.82713	0.312909	0.0730362	2.12558	0.123169
TCONS_00006673	6.72567	8.18761	7.1969	9.44855	7.70542	6.4779
TCONS_00006674	0.0291144	0.645629	0.149403	0.360241	0.0678745	0
TCONS_00006675	0.835523	0.173775	1.09885	0.456707	0.201126	0.687916
TCONS_00006676	0	4.39e-05	0	0.310706	0.00963168	0.000170593
TCONS_00006677	0.645048	0.217512	0.64568	1.03294	0.409831	1.21381
TCONS_00006678	0.249418	0.0427585	0.0217283	0.227418	0.583201	0.572895
TCONS_00006686	16.0542	7.699	0	15.7429	1.0312	0.221923
TCONS_00006805	1.61e-05	0.197536	0.214998	0.730957	0.415914	0.620599
TCONS_00006962	3.46047	3.35782	5.18134	0.354204	6.40842	24.3306
TCONS_00006963	9.05381	9.22519	7.18491	2.88729	3.22291	11.7889
TCONS_00007075	3.63675	1.65865	1.20248	2.21451	1.34865	1.24007
TCONS_00007076	0.134119	0.192101	0.940822	1.57659	0.920664	1.61737
TCONS_00007077	1.03692	0.180264	0.0582203	0.852755	0.118003	0.452541
TCONS_00007078	5.89e-05	0.0739936	0	0.0943673	0.0536036	0.0661952
TCONS_00007079	0.000460003	0.144259	0.0297565	0.140036	0.431742	0.0416089
TCONS_00007080	3.11e-05	0.492146	0.514199	0.154159	0.206167	0.434599
TCONS_00007081	1.12176	3.69762	1.61811	1.09783	0.829263	0.39918
TCONS_00007082	0.22303	0.321049	0.106692	0.306753	0.00144463	0.760741
TCONS_00007083	0.141878	0.0474421	0	0.0976503	0.0430037	0.00485505
TCONS_00007307	0.712839	0	0.600161	0.0674055	0.170405	0.258973
TCONS_00007311	1.05611	0.137539	1.02905	0.713003	1.208	1.08647
TCONS_00007362	5.79016	0.268888	0	2.8078	0	0
TCONS_00007385	1.23176	1.35612	1.33578	1.27827	0.892797	1.62341
TCONS_00007386	0.252039	0.576149	1.03167	0.395141	0.135104	0.0410502
TCONS_00007413	7.82469	1.74034	2.0677	3.0795	5.44849	3.45128
TCONS_00007414	0.511644	0	0	2.08007	0.0683298	0
TCONS_00007415	0	0.851402	0.279464	0	0.0409043	0.0648575
TCONS_00007416	0.896794	0	0.540123	0.522741	1.86707	1.36449
TCONS_00007527	1.98995	1.70802	1.74215	1.53855	1.07449	0.945585
TCONS_00007591	17.1619	13.2954	16.8306	8.58378	13.8074	21.6694
TCONS_00007592	1.09659	0	1.80036	0.000117189	5.88542	2.82373
TCONS_00007602	0.0707784	0	0.0537338	0.0661096	0	0
TCONS_00007603	1.94025	1.89884	0.755032	2.67303	1.46566	1.20412
TCONS_00007604	4.33082	2.57835	1.49677	3.73439	2.24453	2.26293
TCONS_00007605	0.199073	0.344401	0.754723	0	0.16874	0
TCONS_00007606	2.77632	1.28192	0.191905	3.37753	2.25822	1.42406
TCONS_00007607	0.21575	0.201416	0.0327645	0.124576	0.725768	0.0986886
TCONS_00007608	0.13721	1.16252	0.148859	0.135789	3.8e-05	0.90861
TCONS_00007610	0	0.378025	0	0.588252	0	0.000148177
TCONS_00007611	1.77601	0.944219	1.12626	0.513803	0.601789	1.61843
TCONS_00007612	1.09954	1.56165	0.657975	2.64255	3.7265	0.828803
TCONS_00007613	0.0555327	0.766746	0.18924	0.329709	0.117111	0.0925072
TCONS_00007649	0	0	0	0.0743483	0.468863	0.814643
TCONS_00007682	0.0541519	2.91e-05	0.00624975	0.408756	0.456135	0.059495
TCONS_00007684	0.0512196	0.0237536	0.106748	0.327057	0.216254	0.055957
TCONS_00007719	62.4845	23.4097	24.1883	38.8899	25.203	32.4632
TCONS_00007720	35.8732	44.1531	39.2156	73.1044	33.7628	33.3004
TCONS_00007740	0	7.1853	0	1.01731	0	0
TCONS_00007782	0.678504	0.758364	0	0.949866	0	0
TCONS_00007934	0	2.57168	0	0	1.52873	0.624802
TCONS_00007948	0.16768	0	0	0.0739374	0	0
TCONS_00007996	0.973021	0	0.0808417	0.627038	0	0.23246
TCONS_00007999	0.433509	0.827338	0.299748	0.468805	0.556441	0.377871
TCONS_00008110	0.00174291	0.0964698	0	0.376494	4.78e-05	0.0311447
TCONS_00008111	2.37256	3.44504	3.28949	4.1482	3.26849	2.13698
TCONS_00008274	15.9703	31.0354	24.9132	26.6886	30.4152	31.584
TCONS_00008275	2.17194	2.72086	2.03653	3.84496	2.02533	2.71919
TCONS_00008279	7.82916	14.5753	17.4765	15.3601	1.81006	0.932924
TCONS_00008280	6.40161	3.0061	6.44563	6.58773	2.04281	2.50212
TCONS_00008288	0	0	0	0.100315	0.0501407	1.06929
TCONS_00008314	1.84312	1.95826	2.26856	2.76381	3.56936	3.45601
TCONS_00008402	24.0426	28.2872	46.5399	20.6668	27.1169	29.1249
TCONS_00008429	0.367493	1.37929	0.624846	0	0	0
TCONS_00008430	0.222954	0.0729689	0.750067	0	0	0
TCONS_00008443	1.50567	0.153769	0	3.56213	0.874695	0.452679
TCONS_00008444	0.101476	0.387379	0.501671	1.10401	0.509719	0.0568225
TCONS_00008445	1.35703	0	0.442675	0.103784	0	0
TCONS_00008446	0	0	0	0	5.37122	0
TCONS_00008455	2.61283	4.17253	4.03233	4.15418	1.38142	5.82375
TCONS_00008468	0.0151732	0.00350501	0.027979	0.141899	0.0216557	0
TCONS_00008469	2.05651	0.653449	0.45977	1.59368	0.705854	0.497555
TCONS_00008472	0.246141	0.188912	0.466925	0.31807	0.102519	0.890478
TCONS_00008473	1.0551	0.907064	3.35e-05	0.892584	0.907346	0.327996
TCONS_00008474	0	0	0.000219758	0.41394	0.335527	0.384094
TCONS_00008475	0.493258	0.284606	1.06122	1.56203	0.483906	0.151355
TCONS_00008477	0.236892	0.0889806	0.274143	0.25275	0	0.00033622
TCONS_00008480	0.001732	0.0500495	0.420242	0.00246598	0.683163	0.299693
TCONS_00008483	0.203774	0	2.46e-05	0.0633447	0	0.00539397
TCONS_00008484	4.34e-05	0.223174	0.120993	0.550372	0.253808	0.456373
TCONS_00008495	0.305184	0.201534	0.337728	0.328923	0.348776	0.179228
TCONS_00008496	3.79e-05	0.353296	5.46e-05	0.266888	0.27786	0.16387
TCONS_00008497	0.311285	0.333688	0.331525	0.506589	0.777297	1.01899
TCONS_00008503	9.18012	4.44675	10.6401	11.0554	6.32289	4.21192
TCONS_00008580	1.99027	0.359434	0.652098	2.04473	0.0440853	1.32111
TCONS_00008582	9.22091	3.72563	2.91131	3.60206	4.58587	2.15118
TCONS_00008651	2.23852	0.402939	0.533346	1.50343	0.0644185	0.0399806
TCONS_00008711	3.58276	5.16052	4.47049	0.764838	0.901037	0.301778
TCONS_00008712	0.942409	0.920458	0.762223	0.356495	0.701781	0.108235
TCONS_00008713	1.5751	0.939048	2.49255	1.22856	1.30932	2.61969
TCONS_00008715	0.807734	0.319943	0.307088	0.189947	0	0
TCONS_00008716	0.594699	0.227723	0.37892	0.0124033	0	0
TCONS_00008717	0.437256	0.672657	0.000959517	1.86644	2.76396	0.320938
TCONS_00008718	0	0.159158	1.29737	3.14866	0.996296	3.20564
TCONS_00008719	0	0.0616356	0	0.981596	0	0.166733
TCONS_00008722	2.47983	0.541875	0.453511	0.649948	3.17639	5.67507
TCONS_00008723	0.281547	0.0201309	0	0.131932	0.000317625	0
TCONS_00008726	3.45952	2.02941	1.68674	2.23666	2.3412	0.273113
TCONS_00008727	0.288915	0.466852	0.378775	0.283257	0.223971	0.143723
TCONS_00008728	0.652251	0.0720829	0.555198	0.00423285	0.414961	0.612758
TCONS_00008729	0.486454	0.00116708	0	0.080383	0.518108	0.230383
TCONS_00008732	0	0	0.187678	0.101939	0	0
TCONS_00008733	3.1521	1.33057	1.40772	2.83587	2.98256	2.51448
TCONS_00008734	0.100567	0.00116816	0.353022	0.313952	0.631091	0.170282
TCONS_00008735	2.2074	2.07289	1.46852	2.28911	0.856058	2.73463
TCONS_00008798	0	0	0	0.884393	1.41131	1.45035
TCONS_00008799	0.438762	0.490418	0.089801	0.224855	0.508063	0.368058
TCONS_00008854	153.374	105.872	19.0108	728.067	116.393	25.1967
TCONS_00008860	0.679054	0.437827	0.167816	0.799145	0.271511	0.179107
TCONS_00008862	1.11566	0.387701	0	0.22075	0.803001	0.248769
TCONS_00008863	0	0	0	0.121483	0.587357	5.63706
TCONS_00008864	0	0	0	0	1.2794	7.52021
TCONS_00008865	0	0	0	0.313954	0.966074	4.86872
TCONS_00008980	7.19648	5.75001	6.13962	8.52279	2.80303	2.41732
TCONS_00009019	3.62424	1.67502	4.47137	8.31443	3.62336	3.21474
TCONS_00009020	1.71701	2.21603	0.862666	2.07833	1.61532	0.211105
TCONS_00009034	5.52456	0	0	0.835464	0.990806	0
TCONS_00009035	0.362956	0	0.22473	0.321018	0.077787	0.554595
TCONS_00009036	7.58215	3.67125	5.00947	11.0074	6.52892	1.29637
TCONS_00009044	3.68945	0.860714	0.932932	4.65342	0.318558	2.49632
TCONS_00009116	3.30738	1.84637	2.40335	5.77396	3.77462	3.72428
TCONS_00009140	0.141763	0	0.110367	0.0879818	0.0443203	0.126982
TCONS_00009141	0.65228	0.217283	0.833025	0.958305	0.235709	0.10406
TCONS_00009142	3.03393	0.837692	0.858278	2.79877	0.542369	0.593828
TCONS_00009143	0.339092	1.39828	0.261787	0.375943	0.707623	0.421058
TCONS_00009157	0.971568	4.06331	0.0849423	1.13617	1.07933	1.2074
TCONS_00009191	6.27276	4.2057	0	22.4675	11.6696	15.5471
TCONS_00009192	0	0.913388	0.30961	0.402672	2.56484	0.414879
TCONS_00009204	0	0	0	0.657191	1.79458	0.316854
TCONS_00009205	0	0	0	0.618905	1.2e-05	1.33059
TCONS_00009307	0	0	0	0.632713	0.533134	0.792963
TCONS_00009308	0	0	0	0.627215	0.252223	0.211392
TCONS_00009309	0	0	0	0.0663716	0.295559	0.308649
TCONS_00009310	0	0	0	0.758556	0.586196	0.5747
TCONS_00009324	1.78825	0.78664	0.940349	0.826301	1.31849	0.134291
TCONS_00009381	4.48628	6.76773	7.77004	7.83334	5.56917	3.5466
TCONS_00009382	4.73108	4.65855	2.83684	6.9256	3.27559	2.04165
TCONS_00009383	0.552234	0.30885	0.0319701	0.510909	0.0916876	0.0616205
TCONS_00009384	0.94522	0.822081	0.951569	1.13649	1.39649	1.0879
TCONS_00009385	0.125747	0.000135319	0.406207	0.101225	0.140602	0.522931
TCONS_00009387	0.674004	0.700957	0.452569	1.15246	0.618062	0.594674
TCONS_00009388	0	0.758269	0.312854	0.209397	1.24592	1.41224
TCONS_00009394	0.654127	2.07975	0.174757	0.254276	0	0
TCONS_00009434	2.27186	2.03227	3.01354	0.479513	3.06845	4.87492
TCONS_00009457	7.86889	12.4624	6.15438	9.57894	13.3674	9.10194
TCONS_00009543	0	0	0	0	1.99198	0
TCONS_00009561	0.44532	0.284935	0.498428	0.552166	0.635351	0.326553
TCONS_00009669	4.39591	7.13616	2.4087	1.48793	7.97751	6.63528
TCONS_00009696	0.000385506	1.80314	0.00747983	1.19102	1.01875	0.00113237
TCONS_00009697	0.269068	2.68747	3.67573	3.45093	3.17303	1.48776
TCONS_00009700	0	0	0	0.950402	0.288823	0.204926
TCONS_00009712	0.281755	0.600452	0	0.160788	0.25581	2.64866
TCONS_00009713	0.163715	0.425362	0.739678	0	0	0.250857
TCONS_00009714	0.819638	0	0	0.057084	2.35314	0.484199
TCONS_00009716	0	0	0	0.903538	5.25969	0
TCONS_00009717	0.055952	0.362675	0.384858	0	1.06989	1.09772
TCONS_00009718	0	0	0	4.81142	3.72986	2.46867
TCONS_00009719	0	0	0	1.44386	2.5419	0.400661
TCONS_00009871	4.11822	4.17632	3.53166	4.41553	3.99845	15.9674
TCONS_00009872	1.72218	0.170686	0.800028	1.24577	1.26228	3.36999
TCONS_00009934	0.67941	0.988148	0.196288	1.42131	0.41568	0.639795
TCONS_00009935	0.293218	0.156357	0.37142	0.869493	1.16925	0.446276
TCONS_00009938	1.15891	0.971932	0.207606	1.18582	1.10317	0.819015
TCONS_00009967	0	0.347514	0	0.756806	0	0.0930134
TCONS_00010007	0.745797	0.368797	0.61126	0	0	0
TCONS_00010010	0	3.56583	0	0	0	0
TCONS_00010147	0.0983998	0.165773	0.184994	0.243879	0.660486	0.760809
TCONS_00010149	0.0567551	0.414006	0.019548	0.266992	5.61e-06	0.088984
TCONS_00010151	0.525027	0.121533	0.49149	0.0316433	0.224605	0.00842603
TCONS_00010152	0.455862	0.302475	0.320205	0.492529	0.511431	0.672115
TCONS_00010171	0.0273033	0.00945407	2.01e-05	0.094663	0.00191625	0
TCONS_00010184	0.145349	0.181363	0.108298	0.404979	0.12959	0.356636
TCONS_00010357	22.8416	0	2.66601	0.601804	4.14534	0
TCONS_00010358	0	0	0	0.158675	0.98976	0
TCONS_00010449	0	0	0	0.348315	0.267272	0.126664
TCONS_00010521	0.327144	0.166584	0.0734012	1.0609	0.674842	0.254774
TCONS_00010584	0.0165255	0.104837	0.0815785	0.0772534	0.0131018	0
TCONS_00010695	21.5059	19.1121	24.9918	24.7417	22.6008	28.1806
TCONS_00010696	1.04914	2.87524	0.345897	1.41923	0	1.62931
TCONS_00010724	3.41331	1.43173	0.427319	0	0	2.25638
TCONS_00010728	0.291881	0	0	0.149507	0.61326	0.463379
TCONS_00010729	0	0.809937	0.135581	0	0	0.121534
TCONS_00010730	0.506231	0.447294	0.725534	0.779178	0.236299	0.288213
TCONS_00010747	1.07751	0.216131	0.946413	0.569315	0.587433	0.294225
TCONS_00010748	6.68119	8.36402	14.1322	7.80738	5.18009	5.77123
TCONS_00010749	0.884636	0.797183	0.153518	0.332675	2.9445	0.998559
TCONS_00010760	0	0	0	0.920452	0.00970322	0.101684
TCONS_00010761	0	0	0	0.182373	0.769541	0.192749
TCONS_00010762	0.29968	0.130983	2.55e-06	1.41845	0.429012	0.495402
TCONS_00010763	0.000233979	0	0	0.467212	0.195469	0.0550251
TCONS_00010764	0	0	0	0.00913992	0.658287	0
TCONS_00010765	2.42e-05	2.41e-05	0	0.22057	0.535482	0.231973
TCONS_00010766	0.23716	0.0845071	0.0270847	0.652582	0.528541	0.755919
TCONS_00010768	0.081912	0	0	1.98047	1.59399	1.90427
TCONS_00010796	0	0	0	0.0539606	0	0
TCONS_00010866	1.06825	0.812056	0.554949	1.42157	0.490906	0.306747
TCONS_00010938	28.334	22.2184	19.4416	20.145	33.2577	18.8481
TCONS_00011010	0.614866	0.0599179	0.169332	0.465394	0.286825	0.285795
TCONS_00011011	1.12195	0.882614	0.900559	0.66809	1.07329	0.690072
TCONS_00011012	0.0197776	1.24905	0.364529	0.715357	0.351377	0.317093
TCONS_00011013	0.0713289	0.69373	0.289555	0.0802735	0.798298	0
TCONS_00011014	0.764414	0.836939	0.462499	1.95759	1.06696	0.477645
TCONS_00011016	0.585015	0.893215	0.234728	0.648431	0.123898	0
TCONS_00011058	0	0	0	0.426117	1.215	0.606859
TCONS_00011218	0.354164	0.333009	0.00673547	0.484655	0.00018875	0.327221
TCONS_00011220	0.702236	1.04488	0.5336	0.489163	2.04085	2.96646
TCONS_00011249	0	0	0	0.552908	0.789371	0.282917
TCONS_00011251	0	0	0	0.404919	0	4.83e-06
TCONS_00011252	0	0	0	0.258796	0.359078	0.470872
TCONS_00011376	0.489702	0.280411	0.0433287	0.769373	8.12e-05	0.926212
TCONS_00011410	1.79637	0.158147	0.603632	0.859654	0.229349	2.26727
TCONS_00011417	0.0662045	3.14667	0.245568	0.752449	0.242666	0.276732
TCONS_00011419	0	0	0	0.928671	0.0700539	0.0583167
TCONS_00011575	0.390193	1.3414	1.4223	0.36924	2.35893	1.63978
TCONS_00011616	1.28635	0.637712	0.0447125	0.242858	1.72911	0.557524
TCONS_00011698	13.0629	15.5517	3.96679	21.7037	5.04861	5.1211
TCONS_00011725	0.920849	1.67608	0.868173	0.923153	1.25117	0.0402
TCONS_00011726	0	1.62335	0.11695	0.140667	0	0
TCONS_00011735	0	2.96428	0.672826	0.108941	0.399446	0.730453
TCONS_00011755	0	0	0	0.109945	0.387786	0.817272
TCONS_00011756	11.9481	15.0737	14.3099	9.64562	8.42719	7.82969
TCONS_00011757	9.07774	7.09293	5.80811	3.34155	6.26442	3.52891
TCONS_00011822	2.9766	2.19001	3.79242	12.9865	9.5676	8.94832
TCONS_00011824	0.0971766	0	0	5.12451	1.53195	2.48357
TCONS_00011870	1.52687	0.00167421	1.43223	0.481787	8.64189	3.56849
TCONS_00012011	2.65778	1.29897	0.993568	1.44474	0.651138	0.724225
TCONS_00012204	15.4899	23.1947	18.6174	23.2373	16.5606	12.7682
TCONS_00012211	0.102409	0.0239529	0	0.10836	0.0742209	0.0693298
TCONS_00012212	0.293129	0.407975	0.305614	0.178783	1.16979	0.392791
TCONS_00012425	0.835625	0.365553	0	0.638557	0.227607	0.0383784
TCONS_00012498	0.554976	1.18558	0.808802	0.801427	0.182433	0.58284
TCONS_00012499	0.322613	0.00340187	0	0.175314	0.216588	0
TCONS_00012511	1.25101	0.652874	1.22674	0.830597	0.4768	0.50439
TCONS_00012582	0	0	0	0.583495	0	0
TCONS_00012583	6.91046	3.92783	5.12525	6.30571	0.880651	0.563159
TCONS_00012585	0	0	0	1.58171	1.27456	15.6453
TCONS_00012586	0.104198	0.320725	0.143567	6.43489	5.82836	4.68954
TCONS_00012587	0	0	0	11.7463	17.3212	9.67113
TCONS_00012588	0	0	0	32.6336	27.2648	24.3387
TCONS_00012591	1.97198	4.91936	5.40803	3.82322	14.3212	8.11077
TCONS_00012593	0.733796	0.923435	1.17851	0.474646	4.52995	8.30839
TCONS_00012594	0	0	0	0	0.816868	1.82729
TCONS_00012679	3.50811	2.2863	3.07961	6.53601	1.74427	1.73607
TCONS_00012774	2.84593	0.136995	0.0125043	1.51339	0	1.28698
TCONS_00012775	0.92081	0.183909	0.137882	1.38361	0.391376	0.627968
TCONS_00012860	12.558	13.6431	14.4143	10.8058	12.9578	12.9588
TCONS_00012863	1.42493	0.190284	0	0.791107	0	0.350773
TCONS_00012864	0.465202	0.0791516	0.424433	0.771691	0	0.215146
TCONS_00012865	0.243584	0.352114	0.13264	0	0.446416	1.4261
TCONS_00012866	1.35658	0.0822649	0.0860884	0.491197	0.319619	0.448669
TCONS_00012945	0.148404	0.366837	0.235398	0.257089	0.199935	0.112014
TCONS_00013010	3.35398	1.76898	2.28543	1.85825	2.27845	2.81625
TCONS_00013011	35.2448	21.717	25.9137	16.1016	22.6365	22.8286
TCONS_00013160	0	0	0.107215	0	0.191816	0.805371
TCONS_00013164	1.41403	1.6123	0.103374	0.107898	1.09381	0.648114
TCONS_00013165	0.157059	0.270812	0.429806	0.426922	0.295444	0.466987
TCONS_00013166	0.432479	0.542136	0.493058	0.210892	0.0738339	0.426477
TCONS_00013169	11.8325	5.43278	7.8445	5.97435	5.83453	8.32355
TCONS_00013170	2.12623	1.59491	3.90873	3.28034	2.49626	2.20268
TCONS_00013171	0.281829	0.252981	0.560747	0.582201	0.526088	0.467299
TCONS_00013172	1.20974	1.76635	0.444215	1.74345	0.562425	0.562381
TCONS_00013173	23.4644	2.15088	0.150511	14.7474	0.254736	0.400888
TCONS_00013186	2.55562	1.55272	1.00549	0	0	0
TCONS_00013193	0.0334129	0.0417314	1.65704	0.31739	0.694167	10.2424
TCONS_00013194	0.00105327	0	0.699046	0.0438892	0.870474	5.73465
TCONS_00013198	2.44871	8.22401	10.4603	1.39949	15.7283	139.609
TCONS_00013239	50.9432	63.0917	63.0476	61.4453	49.2797	36.2139
TCONS_00013296	2.23903	11.8645	10.9111	3.98178	3.94502	12.5666
TCONS_00013299	12.5723	20.4476	26.5817	14.2864	20.5805	12.3473
TCONS_00013317	10.3848	8.80805	9.08418	18.3934	9.76229	7.88488
TCONS_00013450	0.00929991	0.00483192	0.0688131	0.122186	0.0246238	0.019225
TCONS_00013479	0.0690243	0.0276168	0.150844	0.0564739	0.0416802	0.326757
TCONS_00013505	11.3346	33.118	32.3777	19.9263	13.229	25.4549
TCONS_00013506	0	0	0	0.0551688	0.103543	2.13e-06
TCONS_00013507	0	0	0	0.694552	0.853785	0.108265
TCONS_00013508	0	0	0	0.637677	2.28661	0
TCONS_00013509	0	0	0	0.403583	0.485952	0.0708332
TCONS_00013515	2.83256	2.55142	4.32737	3.30091	2.26499	1.7486
TCONS_00013576	0.472473	0.654216	0.771556	0.425142	0.714984	0.156604
TCONS_00013627	0	0	0	11.4047	7.06837	2.34189
TCONS_00013629	0	0.023268	0.0335493	0	0.093118	0.539367
TCONS_00013631	3.40858	0.246038	0.267906	1.90162	1.18289	1.22232
TCONS_00013632	33.6482	35.681	30.6451	40.1683	26.6104	19.7718
TCONS_00013638	8.92e-06	7.7e-06	0.174764	6.57e-06	0.0582625	0.552428
TCONS_00013639	0.534072	0.816353	0.429512	0.520454	2.66049	0.486661
TCONS_00013658	0	0	0.0315358	0.65166	0.0766598	0.0783929
TCONS_00013669	0.122186	0.0600474	0.0621251	0.180754	0.232514	0.349441
TCONS_00013727	0.0901649	0.152651	0.0806859	0.0588194	0	0.0911597
TCONS_00013737	2.17633	4.80382	2.00327	1.74067	1.11411	1.68843
TCONS_00013738	25.4881	33.8355	29.0887	22.5492	23.9898	17.1942
TCONS_00013823	1.29604	1.6187	1.78262	0.524535	0.240462	0.676156
TCONS_00013893	0.474021	0.328401	0.0630987	0.636104	0.409082	0.223223
TCONS_00014002	0	0	0	0.891007	0.456556	0.32672
TCONS_00014004	0	0	0	0.103873	2.37448	0
TCONS_00014005	0.116457	0	0.205254	0.742367	0.445327	0
TCONS_00014006	0.502646	0.408234	0.476958	0.609943	0.0920754	0
TCONS_00014092	0.257532	0.0792936	0.0872414	0.558653	0.1431	0.116688
TCONS_00014104	6.83211	6.12886	3.01207	8.0137	4.00159	3.8566
TCONS_00014106	0.221142	0.450744	0.0782136	0.247922	0.288353	0.258266
TCONS_00014141	1.38295	1.72885	0.0367949	0.135806	1.04296	1.36566
TCONS_00014297	35.0838	23.2763	15.0979	20.9083	23.9219	27.9932
TCONS_00014311	0.950868	0.150015	0.501832	0.158982	0.901919	0.616917
TCONS_00014369	0.143631	0.324471	0.243546	0.145249	0.327617	0.186571
TCONS_00014390	93.8825	80.0258	67.7237	149.855	135.447	126.356
TCONS_00014404	0.000398404	0.0211749	0.3811	0.227089	0.576884	0.373344
TCONS_00014440	0	0	0	3.58335	3.33187	1.27691
TCONS_00014479	0.34793	2.69526	2.32489	4.09563	6.19464	9.68271
TCONS_00014481	0.541297	0.0807126	0.755299	0.262682	1.08223	0.601774
TCONS_00014566	0	0.20399	0.296148	0.0534396	0.896269	0.279589
TCONS_00014567	0.190783	0	1.41115	0	0	0
TCONS_00014568	1.4127	1.84637	1.97337	0	0	0
TCONS_00014569	0.589541	1.71282	0.854634	1.62524	1.17086	2.53624
TCONS_00014570	4.79362	0.389662	0	0.27425	0	0
TCONS_00014571	0.830582	3.85847	0.268955	0	0.051425	0
TCONS_00014576	0.000326186	1.26e-06	0.483779	3.85e-05	0.601938	0.631629
TCONS_00014582	2.86229	1.73811	1.45486	2.52763	1.32823	2.17083
TCONS_00014610	0.12066	0.12485	0.222518	0.0618889	0.602051	0.747003
TCONS_00014611	0.344808	0.171516	0.176857	0.166956	0.367935	0.233806
TCONS_00014634	11.0784	8.35766	7.79942	11.4805	11.6847	10.7176
TCONS_00014635	2.85309	2.55641	1.24695	0.617446	0.412588	0.875672
TCONS_00014637	5.51419	4.68131	3.06939	1.90598	3.23234	0.52574
TCONS_00014639	1.04139	6.4e-05	0.367998	3.14708	1.36829	1.12535
TCONS_00014640	0.0895288	0	0	0.0750353	0.0458781	0.111508
TCONS_00014641	1.00689	3.48052	1.16588	2.33755	2.70051	2.31831
TCONS_00014642	0.632255	0.0474834	0.340516	0	0	0.439859
TCONS_00014698	0.0525841	0.82737	0.318827	0.352918	0.136104	0.00123207
TCONS_00014699	0.0433211	0.25731	0.122725	0.700736	0.407745	0.440794
TCONS_00014700	1.02586	0.444834	0.690609	1.03096	0.934149	0.853519
TCONS_00014733	1.15609	3.56938	2.45892	2.74227	2.83933	1.09253
TCONS_00014781	0	0	0	0.0634588	1.05064	0.195926
TCONS_00014793	1.48e-05	1.41615	0	0	0	0
TCONS_00014794	0.141976	1.81905	0	0	0	0
TCONS_00014797	2.58932	3.18893	2.98878	4.1269	3.13405	1.41752
TCONS_00014810	6.21e-05	3.13e-06	0.231103	0.298188	0.198336	0.155519
TCONS_00014811	0.777777	0.200997	0.124067	0.0863123	0.704982	0.174503
TCONS_00014819	0.640602	1.13322	2.04353	1.28546	1.31975	0.762623
TCONS_00014836	4.22193	1.68996	1.57606	1.19416	2.10665	1.1322
TCONS_00014845	0.738018	0.677248	0.399971	0.885091	1.10018	0.39104
TCONS_00014846	4.61879	2.52785	2.44833	3.71798	3.4861	1.80838
TCONS_00014890	0	20.894	0	0	0	0
TCONS_00014893	0.190521	0.667084	0.588066	0.46295	0.292837	0.281546
TCONS_00014894	0	0	4.29858	0	0	0
TCONS_00014895	0.188734	0	0	0.270626	0.94001	0.0887765
TCONS_00014896	0.886258	0.899876	0.853688	0.383063	0.175682	0.141961
TCONS_00014897	0.0969413	0.104162	0.597953	0.126926	0.141829	0.20535
TCONS_00014898	0.221652	0.614696	0.221011	0.705956	0.101814	0
TCONS_00014899	0	0	0	0.965969	0.547513	0.250431
TCONS_00014901	0	0	0	0.0747055	0.896151	0
TCONS_00014902	3.14183	1.47325	0.995701	0.58543	1.72595	0.643422
TCONS_00014947	7.68415	19.6282	8.25101	30.7196	8.44238	8.78869
TCONS_00014948	2.37058	3.68187	2.54518	12.3992	4.48382	3.29997
TCONS_00014996	0	0	0	0.442441	0.248296	0.0175172
TCONS_00015006	0.421695	0.418304	0.157744	0.256975	0.62013	0.685721
TCONS_00015012	0	0.12661	0	0	1.27162	0.279589
TCONS_00015013	0	0	0	0.406337	1.08376	1.21349
TCONS_00015044	0.374743	0	2.2892	0	0	0.097975
TCONS_00015109	0	0.188546	0.213972	0.0517142	0	0.137218
TCONS_00015110	25.537	19.4701	20.4832	25.0387	25.0932	30.3843
TCONS_00015111	32.9543	40.5042	30.3249	41.0294	39.0294	30.4975
TCONS_00015129	0.168029	0.0781779	0.692485	0.093478	0.0385615	0.706751
TCONS_00015130	0	0	0	0.76913	0	0.342714
TCONS_00015131	0.248477	0.286699	0.918248	0.123213	0	0.553534
TCONS_00015231	3.48297	1.82971	4.80909	2.76206	3.51179	1.27637
TCONS_00015233	0.477637	1.613	2.30801	0.703377	1.21007	0.720857
TCONS_00015349	0	0	0	2.46314	2.24805	4.93026
TCONS_00015360	6.39868	2.45526	4.13746	3.14758	3.92032	4.12435
TCONS_00015445	1.53917	0.978448	1.49532	0.752112	2.77576	0
TCONS_00015478	5.14257	2.46086	2.10445	5.65514	3.77869	2.97355
TCONS_00015479	1.82243	1.86664	1.57095	4.13424	1.44367	1.68103
TCONS_00015480	1.87722	0.443355	1.23466	1.97346	0.92633	1.18145
TCONS_00015481	2.46263	3.41299	2.1729	4.36636	3.03622	2.48263
TCONS_00015482	0.259281	0.455183	0.0253105	1.17987	0.374236	0.569229
TCONS_00015483	0	0.566453	0.196816	0	0.224231	0.156725
TCONS_00015484	0	0.713125	0.0763834	0.0119319	0	0.511085
TCONS_00015485	1.11475	0.982277	0.924663	1.83545	0.961206	0.00916652
TCONS_00015577	0.607193	0.257329	0.0538649	1.38003	0.897311	0.169932
TCONS_00015578	0.14747	0.310974	0.180627	0.297672	0.225136	0.543497
TCONS_00015584	4.66e-05	0.000165583	0	0.224229	0.104187	0.0204904
TCONS_00015585	0	0.0241284	0	0.367915	0.0878455	0.370474
TCONS_00015586	0.136392	0.0740286	0.0139909	0.226814	0.285524	0.0491958
TCONS_00015588	0.12614	0.272377	0.179265	0.0649439	0.00301498	0
TCONS_00015590	0	0	0	0.11052	0.163091	0.078279
TCONS_00015591	0.0917899	2.88e-06	0.00047629	0.258173	0.0573878	0.291696
TCONS_00015595	0.0758225	0.219965	0.00855299	0.108194	0	0.0266136
TCONS_00015633	0.397216	0.453413	0.38312	0.424488	1.4522	0.675448
TCONS_00015694	1.07037	1.51528	1.96777	1.5948	0.775219	0.568424
TCONS_00015771	4.69e-05	0.611949	0.475947	0.603182	0.416374	0.203702
TCONS_00015772	2.15066	0.767231	0.82716	0.562187	1.23875	0.564972
TCONS_00015775	0.0638036	0.194513	0.191195	0.182151	0.163753	0.284197
TCONS_00015776	0.810413	0.645876	0.998498	0.143339	0.342203	0.952978
TCONS_00015777	0.133149	0.0504935	0.0179806	0.066084	0.100183	0.112011
TCONS_00015780	0	8.28e-05	0	0.11156	0	0.015498
TCONS_00015855	0.338643	0.370381	0.333412	0.387443	0.696214	0.596666
TCONS_00015857	0	0	0	0	0	1.09075
TCONS_00015858	0	0	0.658629	0	0	1.55458
TCONS_00015859	1.69753	2.60848	0.786515	2.12908	1.22925	0.0800512
TCONS_00015860	1.93398	3.33888	1.18283	1.78376	1.00974	1.42882
TCONS_00015861	0.164811	1.19667	1.2384	1.29921	1.00941	1.2804
TCONS_00015862	0.478014	0.20794	0.454624	0.628116	0.717847	0.960142
TCONS_00015863	1.7614	1.39651	2.235	1.04602	0.450633	0.669376
TCONS_00015864	0.578716	0.822482	0.973133	0.239268	0.39114	0.129869
TCONS_00015865	0.588339	0	0	0	5.90302	0
TCONS_00015866	0	0	0	3.7564	0.728914	0.730516
TCONS_00015867	4.32103	0.146133	1.53626	7.23569	2.80495	1.38608
TCONS_00015868	1.47466	1.57609	1.19816	1.97858	0.985043	0.602835
TCONS_00015869	1.9553	0.0713602	0	0	0	0
TCONS_00015871	0.0342202	0.233739	0.304758	0.538879	0.34122	0.676742
TCONS_00015892	0.0418473	0.0771541	0	0.624687	0.73865	0.310798
TCONS_00015905	0.357795	0.179109	0.453391	0.540732	0.812186	0.385196
TCONS_00015925	4.59027	6.30088	5.28677	7.42324	5.66111	4.39715
TCONS_00015948	0.442652	0	0	0.590377	0.426072	7.51661
TCONS_00015971	0	0	0	1.57913	0.515203	0
TCONS_00016113	3.08451	1.52234	2.94594	0.369749	0	0.778574
TCONS_00016233	0.624029	0.6132	0.607548	0.11612	0	0
TCONS_00016256	0	0	0	1.29993	0	0
TCONS_00016257	0.288728	0	0	0.148714	0.123893	0.332891
TCONS_00016258	0.256059	0.415609	0	0.0840129	0.678223	0.0791881
TCONS_00016259	0	0	0.0859756	0.0878804	1.37905	0.279891
TCONS_00016261	0.230336	0.206348	0.0706198	0	0.0527249	0.847203
TCONS_00016265	0.441683	0	0.08166	0.0790394	0.63205	0.122443
TCONS_00016266	2.00539	2.33725	1.9346	3.76326	1.55654	1.95873
TCONS_00016305	0	0	0	0	2.57263	0
TCONS_00016312	0	0.81978	0.222098	0	0.847468	1.8005
TCONS_00016321	0.661333	0.361921	0.225318	0.644391	0.0371208	0.202041
TCONS_00016347	2.73125	1.24104	0.101656	1.96176	0.0298032	0.185192
TCONS_00016415	0	0	0	17.1352	12.0096	4.18501
TCONS_00016422	0.326256	0	0	0.607429	0.707318	1.19917
TCONS_00016426	0.0316745	0	0	0.510059	0.696208	0.681912
TCONS_00016445	1.37842	1.1002	0.167529	2.12762	0.349998	0.0263682
TCONS_00016447	6.96942	1.11185	3.7e-05	5.06414	7.19e-05	5.65e-06
TCONS_00016448	8.27247	1.17693	0.478926	16.9919	0.846196	0.0194175
TCONS_00016451	4.99287	3.0545	2.76762	6.46041	9.27885	1.37345
TCONS_00016452	0.000634317	1.07857	0.583672	0.00104634	0.985397	0.0506517
TCONS_00016455	1.58125	1.75562	0.144616	1.67843	1.3775	0.694323
TCONS_00016491	0.203897	0.336008	0.0903863	0.235905	0.357587	0.186522
TCONS_00016492	0.158593	0.0113656	0.157102	0.207524	0.168343	0
TCONS_00016493	0.532864	0.389988	0.784597	0.720018	0.506732	0.641849
TCONS_00016494	0.00632363	0.000454112	0.0345673	0.115371	0.134779	0.0552631
TCONS_00016548	4.96197	11.1463	5.06909	4.96084	4.62621	4.19602
TCONS_00016549	21.3247	20.7718	18.1687	31.4227	19.4295	12.3917
TCONS_00016552	9.2261	8.2431	6.85989	12.5348	7.26399	6.97088
TCONS_00016553	1.01056	2.54808	1.19004	4.81268	2.50778	1.49753
TCONS_00016554	4.21349	4.79476	1.75519	7.59404	3.45619	1.76628
TCONS_00016643	4.19477	9.60327	6.14053	5.28732	4.0671	4.9716
TCONS_00016752	1.59e-05	1.93e-05	2.22e-05	0.252541	0.644654	0.535145
TCONS_00016754	0	1.73e-06	4.89e-07	0.0633326	0.0919011	0.677063
TCONS_00016755	0.593976	0.279206	0.557509	0.545031	1.98624	1.25302
TCONS_00016756	0.0125595	0	0	0.247096	1.32862	0.82647
TCONS_00016852	0.450657	0.231242	0.251271	0.206994	0.267793	0.121395
TCONS_00016856	2.03155	0.901988	0.706376	0.86764	0.390942	0.34784
TCONS_00016857	0.500397	0.192716	0	0.409686	0	0
TCONS_00016858	0.159664	0	0	0.41518	0.0601194	1.04857
TCONS_00016859	1.00897	0.133505	0.0976363	0.318633	0.251933	0.249341
TCONS_00016861	1.38672	1.58476	3.41919	0	0	0
TCONS_00016862	0.730299	1.22734	1.60455	0	0	0
TCONS_00016874	0.156598	0.393685	1.10877	0.240115	0	0.57687
TCONS_00016932	0.143658	0.00701584	0.0793408	0.278581	0.439446	0.11135
TCONS_00016933	0.141729	0.308256	0.146426	0.269762	0.0169578	0.268084
TCONS_00016934	0.466905	0.42686	0.325413	0.418828	0.146869	0.0241787
TCONS_00016935	0.794718	1.1497	0.796969	1.65959	0.806346	0.288843
TCONS_00016938	0.566187	0.368661	0.274615	0.512809	0.487685	0.371669
TCONS_00016939	0.108188	0.0150363	0.0399148	0.130449	0.0186534	0
TCONS_00016940	0.307057	0.342057	0.388071	0.407331	0.584217	0.121108
TCONS_00016944	0.053154	0.251652	0.281425	0.449805	0.369226	0.320533
TCONS_00016947	0.508912	0.0603953	0.25547	0.211659	0.116534	0.501346
TCONS_00017025	0.204979	0.277445	0.981763	0.244258	0.428964	1.43569
TCONS_00017030	10.0966	6.43311	6.55321	9.53875	8.63078	6.72836
TCONS_00017039	2.70448	1.66228	1.81051	2.64441	2.40898	2.36721
TCONS_00017062	0.645218	1.0381	0.803362	1.0796	0.586523	0.464877
TCONS_00017063	0	4.62037	0	0.331846	0.734468	0
TCONS_00017064	0.225086	0.535849	0.277082	0.214484	0.85238	0.732573
TCONS_00017066	0	0	0.151244	0	0	4.04209
TCONS_00017283	2.13887	1.04873	0	0.542379	0.18124	0.0499105
TCONS_00017353	0	0.163533	0	0.794131	0.0730707	1.202
TCONS_00017365	5.6377	6.3414	3.14573	14.5748	14.3174	6.30333
TCONS_00017366	0	0	0	0.371638	1.49043	0.405124
TCONS_00017371	1.87038	1.09792	0.510284	0.372037	1.25458	1.39549
TCONS_00017372	1.25188	1.48193	0.629001	1.57908	1.80281	1.24792
TCONS_00017374	0.000610036	0.147415	0.217561	0.0521057	0.156521	0.108815
TCONS_00017441	1.50838	2.73646	1.36599	1.8194	0.733893	1.00816
TCONS_00017478	0.0369655	0.0668645	0	0.195199	0.000394927	0.0460216
TCONS_00017506	0.0556805	0.0111541	0.0223794	0.0531686	0.0538993	0.0889664
TCONS_00017679	0.0542751	0	0.663639	0	0.0927576	0
TCONS_00017750	0.141683	0.0551151	0.0816706	0.117254	0.118951	0.0935204
TCONS_00017753	9.63374	10.0303	10.3278	9.16217	5.55224	13.6357
TCONS_00017767	0.842105	0.219892	1.16e-05	0.274854	0.552401	9.19e-06
TCONS_00017768	0.702215	0.127099	0.140855	0.331906	0.158947	0.34684
TCONS_00017769	0.315026	0.193663	0.310344	0.17224	0.316789	0.161817
TCONS_00017770	0.267189	0.337344	0.135221	0.253	0.140722	0.136749
TCONS_00017771	1.62504	1.33667	1.18349	5.18921	0.964554	2.37092
TCONS_00017807	42.525	49.1555	47.5548	60.4089	24.5382	39.1672
TCONS_00017848	2.97214	0.629537	1.91067	0.500193	6.64265	0.585118
TCONS_00017849	0	0	1.01947	0	0	0.148906
TCONS_00017943	1.06219	1.21644	0.382608	2.05715	0	0
TCONS_00017944	0	0	0.17085	0	0.0896959	2.59183
TCONS_00017945	0	0	1.03243	0.236886	0	0
TCONS_00017946	0.13017	0.705115	0.424038	1.17447	0.951233	0.857513
TCONS_00017947	0.0863274	0.321402	0.127562	0.0527574	0.238598	0.551417
TCONS_00017948	0.0954178	1.19927	0	0.294685	0.0876687	0
TCONS_00017949	0.446812	0.0879956	0	1.27741	0.0365448	0
TCONS_00017950	0	0	0	21.7771	9.51656	10.9067
TCONS_00017951	0.227004	0.600936	0.260873	0.128743	0.231445	0.177387
TCONS_00017953	0	0.122219	0.298003	0.166759	1.03358	0.0634206
TCONS_00017954	3.47837	5.72675	3.28886	5.79651	2.89506	1.68756
TCONS_00017994	0.670028	2.0807	1.50193	1.11913	2.00393	0.522569
TCONS_00018071	0.0666716	0.24296	0.236733	0.335498	1.25e-05	0.341238
TCONS_00018073	2.21097	6.52332	5.80842	5.38848	3.45133	2.02147
TCONS_00018074	11.5686	10.7092	12.4446	11.6806	9.90058	14.1526
TCONS_00018075	11.0117	7.01497	8.23626	6.01866	4.0685	20.1839
TCONS_00018080	3.15562	1.60887	0.79122	3.68113	1.69739	0.313769
TCONS_00018165	0.393984	0.973917	0.412979	0.0579184	0.544645	1.40001
TCONS_00018167	0.389802	0.842869	1.98818	0.270931	1.46907	4.60442
TCONS_00018256	0.182856	0.141444	0.521261	1.02254	0.672974	0.546091
TCONS_00018258	1.70962	1.12518	1.468	0.717574	1.90549	0.670943
TCONS_00018276	1.00285	1.67308	0.615334	2.80527	2.71249	1.58849
TCONS_00018277	0.0819089	0.191578	1.3578	0.974093	0.296241	0.818676
TCONS_00018278	0.515048	0.310317	0.160264	0.756121	0.868513	1.58264
TCONS_00018281	0	0	0	0.13487	0.235256	0.181212
TCONS_00018282	0	0	0	0.285655	0	0.0705309
TCONS_00018283	0	0	0	0.254704	0.0856531	0
TCONS_00018359	0.0503816	0.477131	0.845847	0.444044	0.0443486	0.393806
TCONS_00018366	1.88252	1.86614	1.63597	1.08623	0.865536	3.57498
TCONS_00018367	3.75395	2.2433	4.04763	3.0229	3.57788	1.8142
TCONS_00018368	3.1705	3.13083	1.53817	3.89256	1.89382	3.03184
TCONS_00018369	6.72922	2.41079	2.25755	6.30793	3.18824	3.10936
TCONS_00018370	0.767851	0.700114	0.636614	0.747256	0.562406	0.706912
TCONS_00018371	0.615871	0.950642	0.589863	0.779195	0.546995	0.479972
TCONS_00018425	1.21685	1.19523	0.414519	5.6521	3.27181	2.10968
TCONS_00018426	0.000461834	0.655134	0.604943	0.233933	0.615299	1.87484
TCONS_00018428	0.339298	0.301785	0.155176	1.02469	0.633524	0.906325
TCONS_00018429	3.42138	0.975562	2.17248	6.9931	3.82487	2.49028
TCONS_00018430	0.348365	1.55	1.90613	1.70535	0.891955	2.07966
TCONS_00018434	0	0	0	18.9505	8.61825	10.4789
TCONS_00018435	0	0	0	1.37988	0.908216	0.640688
TCONS_00018437	0.163434	0.00684127	0.0432276	0.254651	0.141386	0.00459618
TCONS_00018460	1.16167	0.481291	0.179545	2.96735	0.668505	0.0989364
TCONS_00018553	1.05321	0.44551	0.154128	0.211376	0	0.0473721
TCONS_00018556	0	4.15486	0	0	0	0
TCONS_00018557	1.89346	1.62205	0	0.401964	0.419329	0.964164
TCONS_00018558	0	0	0	0.894107	0.250509	0.731393
TCONS_00018559	0	0	0	0.0953084	0	0.855515
TCONS_00018560	0	0	0	0.131025	0.402955	0
TCONS_00018561	0	0	0.0705612	0	0.226641	0.948758
TCONS_00018562	0.304759	1.90379	0.110412	0	0	0
TCONS_00018563	2.74287	0.922864	0.322378	0.624837	1.66517	3.11758
TCONS_00018590	0.762485	1.57908	0.903417	2.1591	0.0730871	0.726232
TCONS_00018635	1.22724	0	0.102528	0	0	0
TCONS_00018698	0.515535	0.231284	0.0358416	0.332813	0.47363	0.119295
TCONS_00018886	0.0512098	0	0	2.64693	0.407892	0.214224
TCONS_00018889	2.91526	2.11554	1.91302	0.998597	3.24573	2.90566
TCONS_00018998	0	0	1.06635	0	0.375938	1.96572
TCONS_00019003	0.281749	0.443756	0.0196852	1.30137	0.710867	0.526557
TCONS_00019004	0.26897	0.0376932	0.118839	0.247805	0.150718	0
TCONS_00019005	0.211221	0.215349	0.00590157	0.0480325	0.691662	0.000663008
TCONS_00019006	0.379281	0.134491	0.288905	0.336937	0.25821	0.310892
TCONS_00019008	1.439	1.23696	0.955334	1.29706	0.407273	0.953401
TCONS_00019009	0.120584	0.179922	0.0385495	0.408433	0.266651	0.330271
TCONS_00019010	0.176478	0	0.157953	0.150422	0.475115	0.203264
TCONS_00019011	0.145173	0.00212397	0.185012	0.886963	0	0
TCONS_00019012	0.0937602	0.0900698	0.082136	0.279079	0.268419	0.377981
TCONS_00019032	1.02683	0.881953	0.880894	1.45339	1.12064	1.20797
TCONS_00019048	4.98748	1.25415	0	3.11008	0	0
TCONS_00019084	0	0	0	1.06356	0.644544	0.180798
TCONS_00019088	0	0	0	0.281286	0.971284	0.818187
TCONS_00019095	0	0	0	1.36408	2.57372	1.47012
TCONS_00019096	0	0.0317535	0.22058	0	0.0853047	0.871415
TCONS_00019097	0.017653	0.200446	0.859015	0	0.0962594	1.23455
TCONS_00019098	0	0	0	0.3657	2.50889	0
TCONS_00019099	3.71206	3.5667	3.93492	4.27788	6.32084	4.65955
TCONS_00019218	0.0456598	0	0.153851	0.0823834	0.0980971	0.534684
TCONS_00019221	0.698636	1.06813	0.267638	0.301789	0.171147	0.136569
TCONS_00019297	4.48672	2.56253	3.03331	3.38895	1.9111	1.01092
TCONS_00019298	0.642195	0.8902	0.486691	0.142571	3.07853	0.528855
TCONS_00019321	0.260909	0.0717058	0.139586	0.115458	0.0553237	0.307634
TCONS_00019322	0.279505	0.183189	0.215153	0.107263	0.214173	0.215195
TCONS_00019323	0.438659	0.123395	0.000198004	0.157406	0.263175	0.235559
TCONS_00019337	0.177234	0.00785867	0.137263	0.141991	0.182842	0.076915
TCONS_00019463	1.27033	1.85131	1.48089	1.55305	0.350122	0.301119
TCONS_00019499	2.36283	2.87552	3.03627	3.16547	3.16893	2.49094
TCONS_00019501	0.500069	0.919149	0.915682	0.0866262	1.13179	0.822236
TCONS_00019508	0.000469211	0.282977	0.153116	0.317172	8.95e-06	0.0739133
TCONS_00019512	1.00972	0.0786418	0.229675	0.378105	0.360024	0.34709
TCONS_00019514	0.113704	0.342928	0	0.120171	0.597035	0.00153049
TCONS_00019515	0.0181171	0.0209181	0	0.199102	8.2e-05	0.0472217
TCONS_00019520	0.942393	1.61682	1.57838	1.739	2.41238	2.29087
TCONS_00019523	0	0	0	0.0927814	0	1.57e-05
TCONS_00019526	0.266113	0	0.286145	0.353937	1.10831	0.396015
TCONS_00019527	0.00686858	0	0.317405	0.30013	0	0.691207
TCONS_00019528	1.79926	1.56413	1.36769	0.470997	0.21614	0.648015
TCONS_00019529	0.0440944	0	0.0376343	1.45478	0.488272	1.16938
TCONS_00019565	1.9947	2.25295	1.15374	1.21488	1.7804	2.65219
TCONS_00019570	0.458534	1.04041	0.904414	0.46789	1.93961	1.17833
TCONS_00019591	0.306146	0.189008	0.0887844	0.58362	0.86634	0.410954
TCONS_00019592	0.386751	0.938347	0.0844586	0.184564	0.767997	0.599677
TCONS_00019593	0	0.129005	0.027006	0	0.220621	0.972125
TCONS_00019594	1.02787	0	0.239798	0	0	0
TCONS_00019595	2.47752	0.626791	0	0	0	0
TCONS_00019596	3.33143	0	0	0	0	0
TCONS_00019600	1.28902	0.963802	0.774354	1.55842	0.565443	0.365946
TCONS_00019602	2.12665	7.80893	0	0.826759	19.756	1.09772
TCONS_00019604	0.382215	0.0288167	0.0151376	0.25654	0	0
TCONS_00019605	0.647212	13.0518	0	0	0	0
TCONS_00019606	0	0	0	0	4.04916	0
TCONS_00019607	0.702929	0.204511	0.803413	0.0823749	0.446923	0.20671
TCONS_00019608	0	0.123362	0.271259	5.20901	0	0
TCONS_00019609	0.373774	0	0.0995062	0.883765	0.206126	0.289816
TCONS_00019691	0	0	0	50.5932	51.1721	20.4895
TCONS_00019704	0	0	0	2.74365	3.14524	3.69794
TCONS_00019705	0	0	0	0.165017	0	0.908809
TCONS_00019723	1.25002	0.17899	0.450303	0.315681	0.335342	1.00263
TCONS_00019726	3.13301	6.04374	5.25536	5.7924	7.35799	6.40236
TCONS_00019762	5.10699	2.42583	1.90871	5.40638	9.10604	2.51414
TCONS_00019763	1.2386	2.13486	0.238019	0.105104	0.101854	1.99e-05
TCONS_00019790	5.2429	6.86076	6.78321	4.80957	7.74485	5.76938
TCONS_00019797	1.69545	3.82838	2.80704	1.15063	2.57875	1.77372
TCONS_00019798	2.54901	3.93159	1.72944	1.79235	1.46267	1.93111
TCONS_00019799	4.10857	1.15899	0.928901	2.70654	1.43155	4.07869
TCONS_00019870	0.185721	0.42639	0.0792846	0.104239	0.0703	0.638776
TCONS_00019935	0.461958	0.1735	0.510606	0.411961	0.0642821	0
TCONS_00020008	0.191805	0.789957	0.151688	0.0529808	0.733822	0.580063
TCONS_00020015	0.237607	0.521825	0.946324	0.952086	0.788854	0
TCONS_00020016	0	0	0	0.623046	0	0
TCONS_00020018	0	0	0	0.0578848	0.672141	0.936911
TCONS_00020019	0.974617	4.92457	2.99311	0	1.29528	0.730766
TCONS_00020020	0	0	0	1.75928	0.222145	2.07191
TCONS_00020025	0.574783	0.269537	0	0.575921	0.0513703	0.165383
TCONS_00020051	3.09239	3.59013	5.70596	2.68496	4.64676	3.54908
TCONS_00020052	0.00285862	0	0.224823	0.412036	0.141213	0.451559
TCONS_00020244	0.655948	0.409669	0.338103	2.13413	0.975102	0.976792
TCONS_00020245	2.19535	0.201302	0.621787	1.82753	2.46465	1.50506
TCONS_00020248	0.0154554	0.647931	0.494185	0.649328	0.995493	0.307302
TCONS_00020272	0.217618	1.41015	1.02482	0.422041	2.59315	1.11321
TCONS_00020390	0.646137	0.487492	0	0.168716	0	0.033952
TCONS_00020395	1.42253	0.874072	0.512376	0.242605	0.266259	0.181029
TCONS_00020432	0.111051	0.266184	0.0288106	0.330721	0.286686	0.317395
TCONS_00020514	0.202568	0.644924	1.97553	0.455576	0.597205	0
TCONS_00020515	0.113512	0.187199	0.567361	0.654472	0.885544	0.381129
TCONS_00020523	0.934747	1.17353	1.32232	1.73287	1.6487	2.06439
TCONS_00020665	0.817712	0.314716	0.948647	0.603371	0.542092	0.240262
TCONS_00020697	0.0669204	0.529254	0.128189	0.384705	0.428204	0.086723
TCONS_00020698	0.646711	0.249464	0	0.0762548	0.0647977	0.0371901
TCONS_00020745	0.268564	2.10935	7.63538	0	0	0
TCONS_00020797	0	0	0	0.524702	0.0822411	0.0954499
TCONS_00020798	0	0	0	0.473914	1.22917	0.142004
TCONS_00020800	0	0	0	1.91045	10.6974	2.82689
TCONS_00020801	0	0	0	0.410675	2.09185	0.475074
TCONS_00020845	0.741409	1.36009	0.775919	0.664138	0.948437	0.976601
TCONS_00020872	10.8222	10.0302	8.56721	13.4643	11.2292	9.98413
TCONS_00020931	0	1.08941	1.356	0.359486	0.705435	0.518928
TCONS_00020932	1.19882	1.82851	1.72482	0.712044	1.14495	0.913304
TCONS_00020934	0.171387	2.26066	0.127557	0.615144	0	0.491909
TCONS_00020935	0.299421	7.48051	0	0	0	0
TCONS_00020936	3.23926	0.627974	0	2.98366	0	1.32642
TCONS_00020938	0.0786519	1.4021	0.286267	0.0875889	0.0464918	0
TCONS_00020939	3.31993	0.491837	1.28281	1.0112	1.43815	1.21434
TCONS_00020940	0.0458634	0.566476	1.55522	0.226469	0.724683	0.613204
TCONS_00020942	7.18999	4.62427	2.97375	4.3195	5.82423	3.14187
TCONS_00021045	5.03247	3.79646	3.39439	3.94104	6.87376	5.67384
TCONS_00021046	3.4305	2.47973	3.0513	2.70327	4.81676	2.75056
TCONS_00021070	0.338523	0.370318	0.372507	0.272739	1.1317	0.849279
TCONS_00021071	0.0822433	0	0.0185088	0.226365	0.557225	0.028201
TCONS_00021072	0.220478	0.689009	0.644475	1.36991	0.424508	0.288793
TCONS_00021075	0	0.000141155	0.53727	0.0573182	0.223623	0.0484058
TCONS_00021076	0.619332	0.24671	0.121344	0.568495	0.931642	1.29831
TCONS_00021183	0.138103	0.321111	0.175123	0.97301	1.54516	3.96024
TCONS_00021184	0	10.0739	0	0	0	0
TCONS_00021185	0	0	0	1.45616	1.79874	0.598261
TCONS_00021271	0.152774	0.833807	0.808527	0.815055	0.894248	0.636861
TCONS_00021272	0.258908	0.46666	0.433962	0.0646622	0.350587	0.126185
TCONS_00021274	0.333665	0	0.140555	0.599137	0.0641483	0
TCONS_00021364	0.00913727	0.104325	0.571307	0.260424	0.311541	2.47329
TCONS_00021365	0.277971	0.926314	3.81071	0.175134	0.772564	4.54989
TCONS_00021374	4.52542	7.11662	5.25367	5.98819	4.41722	4.55678
TCONS_00021540	0.0240072	0	0	0.116823	1.81867	0.375426
TCONS_00021541	0.00129937	0	0	3.28988	3.85189	4.55935
TCONS_00021631	0.625269	1.42546	0.694324	0.920556	0.188517	0.133462
TCONS_00021632	0.898362	0.375358	0	0.348185	0.313436	0.253023
TCONS_00021652	0	0	0	0.297794	2.67568	0
TCONS_00021653	0.830044	0.225769	0	0.225138	0.157694	0
TCONS_00021654	3.44762	0	0	0.877769	0	0
TCONS_00021655	0	3.61827	0.42693	0.283497	0.458108	0
TCONS_00021656	2.18111	0	0	0	0	0
TCONS_00021657	0.282171	0.076988	0	2.4961	0	0
TCONS_00021658	1.67329	3.16433	0.672081	0.900107	0.143481	0
TCONS_00021677	0	0	0	0.632271	0.262289	0.545082
TCONS_00021681	1.10534	0.900582	0.343998	0.910771	1.64336	2.47936
TCONS_00021682	0.234353	3.5e-05	0	1.10268	0.609887	0.355735
TCONS_00021683	8.30964	7.29769	8.88031	7.03571	9.04983	10.1885
TCONS_00021730	0	0	0	0.636554	1.18106	0.570752
TCONS_00021776	1.0234	0.975983	0.523479	0	0	0
TCONS_00021782	4.88047	9.18107	9.49795	6.99976	4.92639	3.65552
TCONS_00021802	13.6171	12.8114	10.1225	9.89823	21.9468	25.3869
TCONS_00021805	1.31347	1.75191	2.49593	1.3312	1.98857	6.20737
TCONS_00021854	1.74533	1.02543	0	0.118619	0.466328	0.583475
TCONS_00021880	1.19964	1.47523	3.1918	1.50323	2.72316	2.57399
TCONS_00021914	0.87916	3.43193	2.04208	2.58281	1.78434	1.00318
TCONS_00022009	0	0	0	0.291865	1.25171	0.558239
TCONS_00022010	0	0	0	1.47115	0.787919	0.516561
TCONS_00022076	0.106454	0.663393	0.600941	0.261327	0.332603	0.955277
TCONS_00022218	4.64231	1.563	8.73375	2.72661	10.045	9.1823
TCONS_00022220	0	0	0	6.625	0.563372	2.72661
TCONS_00022222	1.43143	0.703873	0	0.445564	0.367608	0
TCONS_00022223	0.0665369	0.116624	0.350987	0.577999	0.0454827	0.296434
TCONS_00022224	0	0	0	0	0	10.1316
TCONS_00022265	0.707775	0.286046	0.70689	0.443771	0.322415	1.31793
TCONS_00022266	8.59256	6.26399	4.64823	8.13462	7.94405	5.12302
TCONS_00022278	59.9594	28.2207	21.7621	36.4374	31.0188	25.035
TCONS_00022296	1.83579	0.968349	2.8488	0.910037	1.45872	0.913655
TCONS_00022394	0.988018	0.306572	0.493463	1.84829	1.76112	1.34526
TCONS_00022395	2.78652	2.39326	1.53651	2.30225	0.99337	3.97735
TCONS_00022402	6.82392	5.50814	4.36173	10.736	4.25248	1.50457
TCONS_00022403	3.178	8.09035	5.23382	1.53668	6.74236	4.8249
TCONS_00022404	3.178	8.09035	5.23382	1.53668	6.74236	4.8249
TCONS_00022411	0.603534	0.730389	0.352781	0.806395	1.00774	0.0569393
TCONS_00022479	4.11749	2.85737	1.11495	4.92597	2.2427	2.69307
TCONS_00022484	0	0	0	9.10005	8.73252	6.11113
TCONS_00022485	0	4.23622	0	0	0	0
TCONS_00022486	2.69453	0	0.229631	0.0940694	0.275788	0.126549
TCONS_00022487	0.083853	0.112158	0.508142	0.188487	0.667957	0.557138
TCONS_00022488	0.247193	0	0.0481195	0.174028	1.19803	0.0585286
TCONS_00022489	0.542131	0.0626899	0.0687945	0.37236	0	0.262964
TCONS_00022490	0	0	1.06703	0.229959	0.185304	0.296384
TCONS_00022491	0.691613	0.380989	0.52522	0.320175	1.27374	0.998981
TCONS_00022492	0.373965	0.365316	0.207376	0.286647	1.32013	0.234938
TCONS_00022493	0.19809	0.896708	0.498413	0.0889276	0.142112	0
TCONS_00022494	5.16763	0	0.724108	0	0	0
TCONS_00022520	0	0	0	49.4009	32.8995	11.8786
TCONS_00022552	0.846968	2.80425	3.65578	0.763728	2.4287	0
TCONS_00022573	0.247645	0.148755	0.25531	0.302119	0.246077	0.0941623
TCONS_00022610	1.28837	1.46255	0.550382	1.08969	0.378938	0.000264806
TCONS_00022651	0.628492	0	0	0.790175	0.264973	0.3044
TCONS_00022652	0.160515	0.357247	3.0453	0	0	0
TCONS_00022904	17.8141	42.1017	36.1288	25.9	36.679	50.6233
TCONS_00022976	0.234804	1.81793	1.36171	0	0.172258	0.601584
TCONS_00022977	0	0.102836	0	0.056563	0	0.0124878
TCONS_00022981	1.1647	1.58862	2.12942	1.56366	0.858499	1.47423
TCONS_00022982	0	0.796077	0.589826	0.148321	5.44e-05	0.0567901
TCONS_00022983	2.96e-05	0.629927	0.512844	0.00026125	0.00149658	0.111099
TCONS_00022984	1.09289	0.732082	0.724388	0.678666	0.792504	0.841525
TCONS_00022985	0.482046	0.794216	0.810862	0.429831	0.757717	1.35173
TCONS_00022986	0.937929	1.00767	0.86209	0.161387	0.984391	1.07836
TCONS_00023043	6.17773	7.08547	4.39606	6.54917	6.59264	6.24737
TCONS_00023069	0.264609	0.265499	0.0612719	0.627154	0.778877	104.318
TCONS_00023070	1.16275	4.22839	6.70035	0.699737	8.57458	56.0785
TCONS_00023079	11.5557	11.4265	9.6504	16.5305	10.1443	7.13316
TCONS_00023080	25.854	24.8151	19.4112	36.2853	23.0985	17.8952
TCONS_00023174	3.89934	3.28213	3.89851	5.29802	2.55529	3.11375
TCONS_00023373	15.2478	29.9382	32.4615	20.6126	25.4847	33.0927
TCONS_00023428	0.117223	1.17947	0.271093	0.126923	0.413503	0.913266
TCONS_00023431	3.56063	2.87537	1.78169	1.6084	3.10571	1.98136
TCONS_00023433	0.895002	0.140567	0	2.05181	4.76977	2.28119
TCONS_00023435	10.4185	0	0.871287	0	0	0
TCONS_00023436	0.383877	0.454947	0.158909	0.64315	0.144926	0.120595
TCONS_00023437	5.39001	1.29897	0	1.32709	0	0
TCONS_00023438	0.751876	0	0.349566	0.410473	1.57706	2.55468
TCONS_00023457	2.72865	0.292894	0.94437	3.3894	0.382953	0.313354
TCONS_00023513	0	0	0	0.0449329	0.592179	3.12315
TCONS_00023627	1.19209	0.27282	0.799886	0.68462	0	0.790514
TCONS_00023628	0	0	0	0	0.677308	0.114149
TCONS_00023630	0	0.282294	0.891665	0.315713	0.984585	0.104371
TCONS_00023679	0.172454	0.150158	0.240747	0.380243	0.532543	0.465072
TCONS_00023680	0.0841614	0.0794109	0.206149	0.212678	0.0109291	7.04e-05
TCONS_00023682	0.255801	0.0469373	0.627686	0.327842	0.233613	0.427552
TCONS_00023683	0.119817	0.40105	0.288451	0.0838342	0.224508	1.04282
TCONS_00023684	0.224113	0.00347032	0.0416361	0.195801	0.345339	0.0370552
TCONS_00023713	74.0445	43.3552	6.87881	22.9056	14.0836	26.0347
TCONS_00023714	113.291	95.7708	106.425	158.852	94.6879	80.671
TCONS_00023731	2.84671	2.782	2.02066	4.15261	1.76185	1.51969
TCONS_00023779	0.549669	0.251945	0.297758	0.241799	0.859195	0.564955
TCONS_00023780	0.902253	0.519708	0.368475	0.622372	0.380776	0.274908
TCONS_00023781	2.05305	2.56276	2.12357	1.73929	1.43084	0.661936
TCONS_00023843	0.154649	0.462696	0.689966	0.201201	0.00112539	0.383069
TCONS_00023844	1.47406	1.01924	0.996909	1.19385	1.63203	0.916346
TCONS_00023852	0.270248	0.244103	0.205875	0.367834	0.52294	0.473773
TCONS_00023853	0.0912506	0.0810536	0.0501294	0.176362	0.0266876	0.127546
TCONS_00023988	0.368793	0.521928	0.375587	1.01054	0.110868	0.277564
TCONS_00023989	2.44439	0.302832	0.0899731	1.36907	3.78e-05	0.0630158
TCONS_00024037	0.369178	0.100249	1.40418	0.590484	0.362501	1.10555
TCONS_00024038	16.2856	15.9941	17.4516	7.18057	5.97084	5.74282
TCONS_00024039	3.91186	0	0	0	0	0
TCONS_00024040	0	0.507331	2.81577	0.228718	0	0.280809
TCONS_00024041	0.103858	0.887543	1.7282	0.161568	1.02702	0.762111
TCONS_00024042	0.0741475	0.604501	0.236056	0.172832	0.576941	0.233204
TCONS_00024043	0	1.27543	0	0	0	0
TCONS_00024044	3.62533	0.920772	0.620188	3.39576	0.321236	0.368659
TCONS_00024244	0	0	0	4.12024	4.81703	4.20722
TCONS_00024245	0	0	0	1.92005	0.715651	2.12792
TCONS_00024246	0	0	0	0.867336	0.0081758	0.000719656
TCONS_00024247	0	0	0	0.854555	0.88297	1.73493
TCONS_00024248	0	0	0	7.64028	2.63614	1.99397
TCONS_00024250	0	0	0	4.58735	4.55146	4.86114
TCONS_00024251	0	0	0	0.0580833	0.829857	0.508242
TCONS_00024252	0	0	4.72e-05	2.76842	2.1128	2.5922
TCONS_00024253	0	0	0	4.92387	4.40725	4.27904
TCONS_00024255	0	0	0	5.13168	2.78241	2.04905
TCONS_00024256	0	0	0.00603211	2.2358	3.79645	3.17196
TCONS_00024288	0	0.380585	0.239744	0.0548677	0.187241	0.198507
TCONS_00024289	0.0980359	0.374859	0	0.101451	0.0194051	0.224613
TCONS_00024299	0.546464	0.467382	0.257752	1.56303	1.38615	0.45159
TCONS_00024300	0	0.0368612	0.0597955	0.0158847	0.949704	0.165706
TCONS_00024301	0	0	0	0.477775	0.726405	1.55458
TCONS_00024302	0	0.812151	0.158384	0.174992	0.29939	1.13389
TCONS_00024303	0	0.205402	0.947413	0.0465333	0.233366	0.510304
TCONS_00024445	1.28437	0.975658	1.23694	0.615052	0.429142	0.678621
TCONS_00024463	29.4294	44.9161	31.0372	48.6392	23.3043	23.1383
TCONS_00024507	1.5811	0	0	0	0	1.29211
TCONS_00024508	11.4783	11.3618	8.9124	24.5409	29.0822	16.1348
TCONS_00024581	0.385978	0.177338	0.91511	0.945894	2.28283	0.686944
TCONS_00024595	0.346841	0.218761	0.120064	1.6221	0.368077	0
TCONS_00024597	1.89575	6.06938	8.23513	0	0	0
TCONS_00024598	0	0.0438753	0.488592	0.0404051	0.795904	0.611337
TCONS_00024599	0	0.402929	0.0581153	0.289324	0.186415	0.735433
TCONS_00024600	0	0.913637	1.10818	0	1.40978	0.048483
TCONS_00024679	0.351847	0.251207	0.173255	1.38048	0.6688	0.347564
TCONS_00024708	4.56858	2.11779	3.14262	2.82706	2.81947	4.6089
TCONS_00024709	3.24397	6.30791	3.40383	5.33979	4.11258	2.71903
TCONS_00024710	3.07218	1.70235	3.28696	3.82326	2.56569	1.16045
TCONS_00024711	4.61185	6.02813	7.69745	4.45987	4.15904	4.43775
TCONS_00024712	0.776355	0.71121	0.890191	0.490936	0.809013	0.650335
TCONS_00024713	3.34799	1.83705	1.32034	2.72598	2.87373	2.41504
TCONS_00024855	0.416948	0.540086	0.873983	0.474018	0.489899	0.0262215
TCONS_00024856	0.370072	0.517059	0.332286	0.699756	0.0137334	0.344572
TCONS_00024857	1.47018	0.000362194	0.00210015	1.05059	0.182452	0.630468
TCONS_00024858	1.76821	0.480382	0.211976	0.142649	0.350482	0.179939
TCONS_00024859	0.300966	0.407834	0.666214	0.00435237	0.0129249	0.272187
TCONS_00024860	0.0717757	0.0610437	0.131848	0.468244	1.27138	0.500995
TCONS_00024861	5.95496	3.9895	3.16573	6.82462	4.72765	5.03537
TCONS_00024862	3.9e-05	2.1696	0.980833	2.3455	0.750955	0.18551
TCONS_00024868	1.24511	2.21268	1.76541	3.6818	2.8645	2.17552
TCONS_00024874	0.158192	0.113563	0.107148	0.298609	0.102298	0.491415
TCONS_00024879	1.02641	0.264316	0.116331	0.564812	0.332364	0
TCONS_00024881	0.142724	0.393932	1.04417	0.104507	0.222294	0.216122
TCONS_00024882	0.0569266	0.247088	0.964356	0.191302	0.588904	0.116602
TCONS_00024883	0.248927	0.149724	0.350361	0.0604354	0.110249	0
TCONS_00024884	0	0.245324	0.118383	0	1.32814	0.891366
TCONS_00024885	0.373511	0.406321	0.995565	0	3.25815	1.45184
TCONS_00024886	0.937636	0.755699	0.790367	0.604635	1.28723	1.79838
TCONS_00025017	0	0	0	3.82707	2.69273	1.46115
TCONS_00025018	0	0	0	5.63329	5.93827	6.64046
TCONS_00025095	1.34644	1.51592	0.978474	0.513977	1.86411	0.190195
TCONS_00025096	0.160963	0.750955	0.190969	0.56963	0.12182	1.30618
TCONS_00025097	0.370658	0.385613	0.753936	0.160521	0.326816	0.416749
TCONS_00025217	3.30691	2.78616	1.79574	1.40136	0.972581	2.38339
TCONS_00025218	0	2.5041	3.63689	4.60769	3.77302	1.88804
TCONS_00025337	29.4545	16.8668	24.9491	10.2873	21.1291	51.8669
TCONS_00025340	4.98626	12.5907	21.7576	1.27176	37.7044	72.5243
TCONS_00025341	0	0	0.536093	3.17881	23.0689	2.17125
TCONS_00025343	6.38287	11.0209	13.5258	0	0	0
TCONS_00025344	0	0	0	3.37866	3.74467	3.40992
TCONS_00025345	1.0811	0.538606	0.892957	0.872161	0.467404	0.850043
TCONS_00025346	0.493278	1.02493	0.723916	0.400017	2.65984	2.7556
TCONS_00025367	3.10692	8.18573	0.395297	5.12709	0.0129466	1.73883
TCONS_00025431	0.0234231	0	0.0230446	0.577035	0	0.278176
TCONS_00025432	0.3321	0.158946	0.141781	0.0736216	0	0.262617
TCONS_00025433	2.93883	1.55409	1.46361	3.77625	1.94206	1.9576
TCONS_00025454	0.0895491	0.890911	0.619367	0.495417	0.629933	0.409589
TCONS_00025457	0.0588779	0.0660315	0.391059	0.0763211	1.04181	0.256799
TCONS_00025464	0.227543	0.804979	0.170991	0	0	0.0839667
TCONS_00025531	1.53732	0.994054	0.897022	1.93836	1.1658	2.20145
TCONS_00025573	0.089348	1.28987	0.337017	0.0615836	0.45453	1.42599
TCONS_00025578	1.8461	0.721019	0.748731	0.849242	0.698455	0.077506
TCONS_00025756	6.91139	0.644611	1.02062	0.11124	0	0
TCONS_00025882	0.0110809	0.0407051	0.120369	0	0.940478	0.331265
TCONS_00025883	0.0545087	0.000496739	0.280229	0.176699	0.0357781	0.388054
TCONS_00025885	6.63e-06	0.0696204	0.0629665	1.5e-05	0	0.58217
TCONS_00025925	108.045	112.998	39.1808	205.921	40.3341	74.708
TCONS_00025985	0	0	0.0281364	0	0.0329074	0.54862
TCONS_00025986	0	0	0	0	0.661569	3.09274
TCONS_00025988	0	0.915912	0.59415	0.252537	0.472242	0.962556
TCONS_00026185	0	0.0464783	1.50936	0.126934	0.264074	0.542666
TCONS_00026200	2.15931	0	0	0.379703	0	0.84808
TCONS_00026201	1.20396	0.503801	0.933957	0.188871	0.421597	0.481782
TCONS_00026272	1.21023	19.0423	46.7983	0.728083	3.43428	2.12291
TCONS_00026343	0.229416	0.602362	0.344267	0.617925	0.70549	0.222534
TCONS_00026447	0.791391	1.33396	0.68216	0.94483	0.796214	1.56638
TCONS_00026569	0.352468	0.702849	0.190751	0.207714	0.138456	0.344138
TCONS_00026659	8.75397	3.7697	3.25403	1.44065	3.29173	4.51929
TCONS_00026703	0	0	1.38771	0	0.087874	0
TCONS_00026777	0.407405	0.124818	0.0763863	0.196214	0.144739	0.0994886
TCONS_00026843	0.0745398	0	0.236093	0.238844	0.222394	0.116485
TCONS_00026844	0.475755	0.12923	0.408472	0.0829989	0.00380041	0.0647416
TCONS_00026847	0.891699	0.678677	0.878502	0.815766	0.703599	0.721006
TCONS_00026892	0.224988	0.938484	0.806774	0.459755	0.501521	1.03964
TCONS_00026893	0	0	0.0342296	0.371765	0	2.49e-05
TCONS_00026894	0.615977	0.0867892	0.515971	0.285378	0.857987	0.965226
TCONS_00026895	0.256995	0.98895	0.442713	0.0540705	0.0848919	0.000142103
TCONS_00026896	0.0672748	0.185328	0.0364169	0.401513	0.000288825	0
TCONS_00026897	1.48685	0.291385	0.224513	0.912843	0.311538	0.61249
TCONS_00026898	1.07099	1.42343	0.156804	2.4796	1.09154	0.369341
TCONS_00026899	0.506612	1.16768	0.61897	0.12432	0.26201	0.442157
TCONS_00026900	0.214286	0.106875	0	0.0662292	0	0.00412261
TCONS_00026901	0.709837	0.719578	0.820913	0.454709	1.00223	0.760924
TCONS_00026902	0	0.0961407	0.0506833	0.213943	0.043073	1.07e-05
TCONS_00026904	1.25398	0.110916	0.152143	1.49125	0.932796	0.18485
TCONS_00026905	0.536677	0.176209	0.122722	0.173868	0.00380776	0.113095
TCONS_00026907	1.33758	4.70178	1.4956	1.61674	0.870752	1.02882
TCONS_00026908	0.789451	0.48752	0.353885	0.203492	0.126539	1.28353
TCONS_00026909	0	0.150316	1.41397	0.860796	1.3657	0.212343
TCONS_00026910	6.4408	5.00616	6.56703	5.10567	6.69754	5.27214
TCONS_00026911	0.512626	0.037642	0.446712	0.119202	0.393893	0.149649
TCONS_00026912	0	0.668535	0.624928	0	1.72665	4.4307
TCONS_00026913	167.139	78.7579	16.0849	70.1778	16.3026	15.0113
TCONS_00026914	0	0	0	0	1.01135	0
TCONS_00026915	0.428074	0.286793	0.316063	0.643603	0.0271534	0.199386
TCONS_00026916	1.54618	1.78965	0.9351	1.20375	0.73394	0.467823
TCONS_00026918	1.20678	1.57628	1.38918	1.47167	1.56645	1.48481
TCONS_00026921	0.628829	0.235093	0.168582	0.186747	0.246889	0.223872
TCONS_00026922	0	0	0	0	1.20023	0
TCONS_00026923	0	0	0	0.0517664	0.494544	0
TCONS_00027135	0.108883	0	0	0.219244	0.752403	0.226493
TCONS_00027166	0.835804	0.273091	0.561522	0.152177	0	3.47e-05
TCONS_00027167	5.87725	5.21215	9.55865	6.00082	8.47861	6.73543
TCONS_00027168	0.0598878	0	0.542449	0	1.72753	1.48918
TCONS_00027195	0.433995	0.681427	1.20594	0.915835	0.51816	1.09218
TCONS_00027196	0.844818	0.604522	0.44247	0.763056	0.952361	0.819336
TCONS_00027447	90.2533	59.8826	47.4784	67.9301	59.4913	49.0824
TCONS_00027753	0.0360851	0.685354	0.35972	0	2.15e-05	0.133412
TCONS_00027756	0.0647647	0.539402	0.590377	0.0628423	0.0936639	0.332769
TCONS_00027820	1.36276	0.703894	0.0582669	1.10046	0.23086	0
TCONS_00027835	0	0	0.189885	0	0.485601	1.08567
TCONS_00027836	0.646658	0.0981604	0.04062	0.541413	0.117959	0.189183
TCONS_00027837	0.332409	0.242815	0	0	0.0745901	1.4021
TCONS_00027838	0.0819843	2.3438	0.365757	0.451529	0.300505	0
TCONS_00027839	0	0	0	1.85989	1.65965	0
TCONS_00027843	0.0506775	0.188468	0.0854058	0.112872	0.838766	0.544601
TCONS_00027844	0	18.2142	0	0.825888	0	0
TCONS_00027847	0.217917	0.182017	0.876776	0.062222	0	0
TCONS_00027848	0.146258	0.758676	0.689284	0.612769	0.55403	0.277238
TCONS_00027849	0.92677	3.05914	9.51754	2.49198	1.29201	0.695091
TCONS_00027850	0.0832752	0	0	0.0878141	1.0134	0.12427
TCONS_00027851	0	0.710408	0.425005	0.0786601	0.584737	0.795797
TCONS_00027852	1.03913	1.39892	1.07893	0.897703	0.776209	0.864137
TCONS_00027853	0.201461	1.93322	1.05064	0	1.86691	36.0318
TCONS_00027854	0.33621	0.110047	0.772715	0.617278	1.37201	0.190664
TCONS_00027855	0.552792	0	0	0.726471	0.102085	0
TCONS_00027856	0	6.96652	0	1.63752	0	0
TCONS_00028016	1.26605	1.81442	0	8.50459	0	0
TCONS_00028017	0	12.4155	4.25364	0	0	0
TCONS_00028018	0.539096	0.836647	3.96556	0	0	0
TCONS_00028019	0.544582	3.21824	1.14497	1.06134	0.629749	0.776868
TCONS_00028184	0.824586	0	0	0	0	0
TCONS_00028220	1.57874	1.85117	2.53001	1.54665	2.04947	1.73119
TCONS_00028243	3.06819	2.71086	5.21378	3.19285	0	0.0680479
TCONS_00028379	0	0	0	1.76164	2.41792	1.17482
TCONS_00028434	0.102028	0.0353567	0.192345	0.799684	0.0623288	0.260918
TCONS_00028436	0	0	0	0	1.40521	0.928729
TCONS_00028439	25.8115	17.7248	3.07339	4.09947	3.80628	3.05405
TCONS_00028440	0	0.501478	0.073192	0.262472	0	0
TCONS_00028687	0.333898	0.184125	0	0.260277	0.210472	0.053945
TCONS_00028690	0.269167	0.487027	0.706209	0.835805	0.564999	0.549531
TCONS_00028785	0.159672	0.789476	1.1014	0.330073	1.12376	1.4155
TCONS_00028786	0	0	0	0.740384	0.631814	0.77107
TCONS_00028787	0	0	0	3.75817	1.80685	4.75254
TCONS_00029047	0.514986	2.314	3.08281	2.46953	3.37732	10.3578
TCONS_00029096	0.377997	0.15182	0.319646	0.298542	0.150044	0.0775711
TCONS_00029097	0.22136	0.373342	0.249961	0.603055	0.686815	0.250809
TCONS_00029258	0.362871	1.05693	0.509953	0.113867	0.170951	0.351511
TCONS_00029259	0.918187	0.411136	0.880495	0.484278	0.412982	0.274179
TCONS_00029288	0.616088	0.0892181	0	0.103083	0.291814	0.720042
TCONS_00029289	0	0.16964	0	0	0.995786	6.07642
TCONS_00029290	0.565406	2.07822	4.34726	0.0796735	4.5538	29.9286
TCONS_00029292	0.0211923	0.274708	0.496442	0.0777179	0.0798099	0.0511006
TCONS_00029293	2.22807	3.78575	0.644373	0.971508	3.10432	1.0441
TCONS_00029296	0	0	0.0293529	0	0.0955535	1.10518
TCONS_00029298	1.14955	1.45417	0.491174	0.465862	0.572014	0.788019
TCONS_00029299	0.14726	0.184215	1.62396	0.166157	0	0.422151
TCONS_00029300	0	0.364493	0.655949	0	0.263196	0.628219
TCONS_00029517	10.542	8.05454	5.02324	4.94111	5.17475	5.73599
TCONS_00029518	10.9939	13.4029	6.79718	12.7456	5.28561	8.12188
TCONS_00029532	0.0593113	0.636078	0.396645	0.485066	0.428695	1.43476
TCONS_00029535	0	0.75937	0.355498	1.92232	1.27617	4.31642
TCONS_00029659	1.80782	1.5098	1.29701	1.17877	2.48833	1.44263
TCONS_00029830	0.808018	0.405305	0.0221062	0.0234688	0.0578087	0.0486276
TCONS_00029839	12.2439	17.3704	17.6801	21.398	16.0859	18.0658
TCONS_00029840	1.09443	0.639792	0.461069	0.547018	0.314719	0.851949
TCONS_00029888	0.0849487	0	0	1.07552	0	0
TCONS_00029889	0.274942	0.387345	0.571877	0.1911	0.0613741	0.643457
TCONS_00029890	0	0	0	4.95181	1.1422	1.70222
TCONS_00029891	1.77484	0.623821	0.25662	1.85646	0.682217	1.98765
TCONS_00029893	1.31425	0.666518	0	2.03322	0	0
TCONS_00030084	8.14768	15.5289	7.10696	18.7206	13.0308	12.1657
TCONS_00030085	0.089678	0.0960984	0.694669	0.611767	0.759318	0.219611
TCONS_00030086	2.44264	0.652901	1.63316	1.43738	1.46411	0.189802
TCONS_00030087	5.82242	1.50081	1.33598	3.62846	2.59487	0.96546
TCONS_00030088	0	0	0	19.8092	12.807	31.9657
TCONS_00030089	0	0	0	4.63913	1.35374	0.230358
TCONS_00030136	1.48012	2.78122	1.32512	1.64824	1.11064	0.831291
TCONS_00030226	25.9386	41.8763	23.3295	24.0085	34.1145	28.6741
TCONS_00030227	22.4452	29.7632	33.0464	14.0139	33.0002	37.6033
TCONS_00030255	0.074644	1.03917	0.506155	0	0.37339	0
TCONS_00030257	0.21085	1.00989	0.093716	0	0.134569	0.127912
TCONS_00030296	3.38482	4.19993	1.05753	3.54259	11.1071	6.02035
TCONS_00030301	0.0384796	0.44793	0.416008	0.117035	0.821099	0.450471
TCONS_00030302	0.132776	0.14607	0.208622	0.0935215	0.401433	0.42593
TCONS_00030305	1.71196	0.264431	0.0764994	3.00448	0.450697	0.463602
TCONS_00030306	0.327053	0.871699	0.108911	2.31226	1.04334	2.66e-05
TCONS_00030475	1.64214	1.14049	0.347636	1.46138	0.253029	0.0256887
TCONS_00030487	11.3705	21.3295	19.4501	10.4397	27.8523	9.59814
TCONS_00030488	0.151681	5.1435	0.954024	1.25302	4.63276	2.41048
TCONS_00030550	0.130301	0.0643515	0.184634	0.083188	0.502278	0.334592
TCONS_00030551	0.0719927	0.649252	1.21618	0.0317977	0.909002	0.698019
TCONS_00030552	0.122996	0.0229286	0.534399	1.29e-05	0.161562	0.147559
TCONS_00030553	0.259167	0.76218	0.948681	0.148338	1.1472	1.3841
TCONS_00030555	0.0156429	0.16758	0.248382	0.179152	0.954787	0.404183
TCONS_00030566	3.05697	9.96956	9.68548	6.74645	5.11934	8.12637
TCONS_00030606	0.940665	0.407248	0.29864	0.0615391	0.0809659	0.0101481
TCONS_00030610	0.280343	0.213764	0.193986	0.404932	0.336057	0
TCONS_00030611	0.116858	0.202277	0.290413	0.0782826	0.076752	0.000241841
TCONS_00030612	0.352666	0.502841	0.214967	0	0.042897	0
TCONS_00030615	20.2317	23.0772	12.1945	20.586	17.6883	10.6442
TCONS_00030656	0	0.0810972	0.332976	0	2.30252	0.114861
TCONS_00030777	4.7275	4.98372	0.769764	2.49325	1.1532	1.73199
TCONS_00030778	0.267195	0.618151	0.988528	0.172181	4.18982	1.58281
TCONS_00030779	0.0645593	1.10487	1.70815	0.231298	4.89192	1.35226
TCONS_00030867	4.52131	4.58555	5.90597	4.32663	5.40869	5.3381
TCONS_00030882	3.47054	3.86168	3.09103	1.67708	2.45447	3.27625
TCONS_00031008	2.10167	1.84052	1.31655	1.14725	0.434639	0.282531
TCONS_00031009	0	0	0	0	1.39314	0.161
TCONS_00031025	0.267774	0.89666	0.766641	0.779812	1.09797	0.60527
TCONS_00031026	0.00575189	0.0100614	0.123689	0.465855	0.00760861	0.0068224
TCONS_00031042	5.08771	3.0654	4.02826	6.15156	3.70968	3.44152
TCONS_00031046	7.50875	0	0	1.16254	0	0.308154
TCONS_00031066	29.7696	44.6828	13.948	60.3527	31.4416	28.8781
TCONS_00031116	0	1.00978	7.4104	0.289518	3.86643	4.50598
TCONS_00031149	0	0	0	0.528401	0.690297	0
TCONS_00031150	0	0	0	3.90727	3.37673	1.81416
TCONS_00031151	0	0	0	3.93217	5.29122	5.31358
TCONS_00031169	0	0	0	0.556751	0.221308	0
TCONS_00031171	0.856201	1.36308	1.46486	0	0	0
TCONS_00031172	0	0	0	0.575895	0.407942	0.12626
TCONS_00031173	1.28047	0.844941	0.907933	1.42549	0.924947	0.46471
TCONS_00031175	1.30421	0.993672	0.70213	1.77423	0.663443	0.325141
TCONS_00031177	0	0	0	2.9772	0.707284	0.727107
TCONS_00031181	2.29809	1.62801	1.71877	1.78236	3.22567	1.01473
TCONS_00031182	0.00512514	0.0352727	0	0.0817258	0.381634	0
TCONS_00031183	3.27312	1.06363	1.22357	2.13189	1.52869	2.94492
TCONS_00031186	0.0978284	0	0	0.169272	0	0.21006
TCONS_00031188	0.400332	0.33603	0.683234	0.658351	0.284602	0.208561
TCONS_00031219	0.246577	0.317464	0.122358	0.217397	0.282702	0.232626
TCONS_00031250	20.9243	14.0186	15.4983	14.4637	20.4117	24.973
TCONS_00031252	1.04021	0.457382	0.0164392	0.208092	0.840892	0.265991
TCONS_00031258	0.717183	1.9447	1.45713	1.9549	2.6623	0.42061
TCONS_00031272	1.62806	2.30741	2.07487	2.06207	0.68944	0.991656
TCONS_00031276	1.06674	0.227516	0.703538	0.167145	0	0.507262
TCONS_00031278	1.01287	0.0180022	1.03733	1.33766	2.5498	1.28192
TCONS_00031279	1.28904	0.0040885	0	0.320844	0.355213	0.539537
TCONS_00031280	0.302379	0.667357	0.00315066	0	0.0985916	0
TCONS_00031281	6.93352	4.30983	5.3155	10.3104	3.64146	4.18402
TCONS_00031282	2.04659	0.137318	0	1.17183	0.520643	1.90028
TCONS_00031284	0	0.211494	7.95e-05	0.164069	0.102294	0
TCONS_00031285	0.772572	0.180585	0.829808	1.05343	0.958997	1.20397
TCONS_00031286	0	0.0138202	0	0.591845	0	0.102126
TCONS_00031288	2.91037	1.25271	0.310871	1.38579	0.951805	0.434887
TCONS_00031289	0	0	0	0.0643907	0	0.190759
TCONS_00031291	0.0486294	0	0.0935913	0.10452	0.48259	0.0612442
TCONS_00031294	0	0.545486	0.0584346	0	0.0106889	0.351405
TCONS_00031296	3.89995	3.30427	3.3269	4.54203	5.47394	6.22989
TCONS_00031297	0	0	0.53449	0	0	0
TCONS_00031298	1.06967	0.0556646	0.4127	0.386899	1.8302	0.909983
TCONS_00031299	0.15995	0.408129	0.985488	1.38915	2.52838	0.61738
TCONS_00031301	0.0362504	0.365692	0.365907	0.423099	0.332058	0.804756
TCONS_00031302	2.23031	8.95619	3.03912	5.99787	5.41782	4.61646
TCONS_00031303	0.588191	2.23838	0.249699	0.723738	0.225399	2.28061
TCONS_00031304	1.54097	0.499234	0.0328813	1.07571	0.0709138	0.243056
TCONS_00031305	0	0.0364312	0.123338	0.486218	0	0
TCONS_00031306	0.372749	0.429946	0.820822	0.0812221	2.02666	0.932095
TCONS_00031307	0.00672244	0.594891	0.0291207	0.41089	1.37133	0.144345
TCONS_00031388	0.58022	2.46472	2.0112	1.17004	1.77208	1.10744
TCONS_00031389	0	0	0	0	0	1.16524
TCONS_00031390	0.485855	0.95563	1.61753	1.31092	4.02565	1.83062
TCONS_00031486	2.21864	1.85232	1.55953	0.333656	1.63997	0.742017
TCONS_00031608	2.83563	10.6418	8.12727	1.96495	4.00217	1.94897
TCONS_00031654	0	0.231441	0.0280092	0	1.76859	0.746621
TCONS_00031655	0	0.137512	0.180319	0	0.811866	0.0940139
TCONS_00031685	0.0963595	0.122087	0.20922	0.350759	0.174069	0.177648
TCONS_00031696	0.0938815	0.233434	0.211363	4.34078	2.56608	0.986178
TCONS_00031697	0	0.0347063	0.0472534	0.993176	0	0.184626
TCONS_00031756	0	0	0	0	0	0.76222
TCONS_00031757	0	0	0	0	0.126132	0.618214
TCONS_00031761	1.28e-07	0.0643382	0.160426	0.948319	1.42166	1.45587
TCONS_00031762	0.0290579	0.0247276	0.0488412	0.0718868	0.335999	1.00558
TCONS_00031763	0	0.182893	0.0380801	1.03169	1.26292	1.10049
TCONS_00031805	4.09416	2.57069	1.12103	3.03012	1.60994	3.84435
TCONS_00031852	0.358432	0.561385	0.266348	0.386595	0.397834	0.692737
TCONS_00031853	0.334447	0.305924	0.356229	0.518226	0.661692	0.208466
TCONS_00031854	0.11176	0.0250021	0.336329	0.283944	0.0617626	0.410645
TCONS_00032003	11.3767	24.8373	22.8807	10.093	29.6403	41.9791
TCONS_00032007	0.227482	0	0	0.205099	0	0
TCONS_00032009	0	0	0	0.0545147	0.305295	1.47077
TCONS_00032010	0.0647924	0	0	1.05033	0	0
TCONS_00032118	4.4807	0	0	0.656505	0	0
TCONS_00032158	0.116143	0	0	0.422375	0.696806	0.586432
TCONS_00032160	0	0	0	1.63437	0.879948	3.40885
TCONS_00032166	7.11241	3.24133	7.75162	0	0	0
TCONS_00032255	0	0	0	18.4474	22.8877	3.84393
TCONS_00032258	0.377714	0.19562	0.0621948	0.336757	0.427996	0.623279
TCONS_00032279	0	0	0	0	0.0865743	2.82195
TCONS_00032322	0.0274241	0.137063	0.210565	0	0.10052	0.883793
TCONS_00032323	0.455552	0.0657115	0	0.0704084	0	0.823877
TCONS_00032325	1.29191	1.70091	1.76116	0	0	0
TCONS_00032326	5.57124	3.05881	4.84179	0	0	0
TCONS_00032342	4.50887	4.88105	2.59521	4.0335	1.13417	5.58625
TCONS_00032408	4.90337	24.9137	13.419	15.7624	16.8903	27.2025
TCONS_00032417	1.54622	2.54719	1.81553	2.86178	3.80395	2.27443
TCONS_00032477	0	0	0	0.740713	0.895465	0
TCONS_00032479	0	0	0	0.638132	0.932128	0.0115575
TCONS_00032480	0.0513562	0	0.198394	0.087579	0.146319	0.000265491
TCONS_00032481	3.3707	5.59343	5.22321	3.11161	6.05489	9.0243
TCONS_00032489	8.58054	28.2373	17.0892	18.4205	26.7412	21.0047
TCONS_00032503	0.413545	0.1503	0.0500466	0.405195	0.213816	0.440944
TCONS_00032504	3.33236	0.993194	0.998037	2.08947	1.4412	0.858719
TCONS_00032528	0	0	0	2.11166	2.5299	1.1859
TCONS_00032529	0	0	0	0.48898	9.16e-06	0.769178
TCONS_00032530	0	0	0	0.523854	0.977027	0.185997
TCONS_00032531	0	0	0	0.567764	0.202071	0.12738
TCONS_00032532	0	0	0	0.170413	0	0.0460208
TCONS_00032533	0	0	0	0.201151	0	0.0315474
TCONS_00032534	0	0	0	0.12091	0.0269845	0.000315281
TCONS_00032535	0	0	0	1.74217	1.88095	0.897339
TCONS_00032542	0.633768	1.02443	1.06579	0.755923	1.37117	1.06219
TCONS_00032543	0.487061	0.929303	1.03025	0.373199	0.398399	1.70436
TCONS_00032609	0.0118309	0.0345342	0.125432	0.103179	0.066901	0.266204
TCONS_00032625	0	0	0	0.13124	0.0238095	0
TCONS_00032628	0.968104	9.3e-05	0.33825	0.000321119	0.155353	0.749574
TCONS_00032629	0.858277	2.91164	2.97373	2.45541	2.26114	0.862664
TCONS_00032630	1.29391	1.1297	0.584003	0.723011	0.671538	2.09497
TCONS_00032634	0.215676	0.124027	0.254137	0.529737	0.960483	0.000175287
TCONS_00032635	1.31345	0.71203	1.13692	0.824135	1.00971	0.830326
TCONS_00032636	1.3046	1.32673	1.3417	1.85931	1.6104	1.01809
TCONS_00032638	0.813032	0.819894	0.447145	0.330566	0.560879	0.218834
TCONS_00032639	0	1.21413	0.604278	1.2655	1.07356	0.590373
TCONS_00032645	1.70505	0.697398	0.702058	1.12058	1.54664	1.6092
TCONS_00032727	0	0	0	2.73119	3.15133	3.84916
TCONS_00032728	0	1.5967	2.09254	0	0	0
TCONS_00032730	0	0	0	0.556192	0.289127	0.582303
TCONS_00032731	0	0	0	0.585717	0.224877	0.205576
TCONS_00032732	1.08118	1.73865	1.94739	1.35519	1.20721	1.06943
TCONS_00032733	1.27753	0.122443	0.165938	0.259431	0.197337	0.525605
TCONS_00032766	0	0	0.759752	0	0.882188	1.18567
TCONS_00032767	0	0.40662	2.39664	0	2.68268	17.3671
TCONS_00032768	0	0.065171	2.85936	0	1.98754	7.67364
TCONS_00032770	0	0.149884	0.572019	0	0.707297	4.24557
TCONS_00032842	2.51435	1.33253	2.85068	4.02247	1.50448	1.92795
TCONS_00032879	0.211259	0	0.757191	0.241151	1.17744	0
TCONS_00032881	0.970287	1.81637	2.6291	2.8633	1.63781	1.06438
TCONS_00032883	0.101491	0.667274	0	1.26768	0.580265	0
TCONS_00032988	0	0	0	0	0	1.53436
TCONS_00033061	0.156868	0.356916	0.240801	0.196191	0.717835	0.573446
TCONS_00033071	0.107183	0.0758066	0.0867437	0.100597	0	0
TCONS_00033086	0.278071	0.0164088	0.0957929	0.297595	0.261501	0.305275
TCONS_00033100	0.997672	1.34709	1.02494	1.61796	1.09118	0.837974
TCONS_00033177	0	0	0	1.64935	0.757384	3.21319
TCONS_00033178	0	0	0	0	1.68892	1.30357
TCONS_00033190	1.42878	4.39063	3.562	1.24154	2.88067	6.03911
TCONS_00033207	3.28555	2.5877	1.74679	3.15894	2.57458	0.592861
TCONS_00033214	1.6713	0.737896	1.36875	0.604718	2.50371	0.452657
TCONS_00033215	1.52354	4.45337	4.14716	2.33749	2.36466	0.860561
TCONS_00033228	0.344485	0.96491	0.59094	1.3336	0.812732	0.668441
TCONS_00033246	2.07549	1.32191	0.136487	4.20114	1.29802	0
TCONS_00033293	0	0.0118774	0.0286791	0.224966	0	0.691712
TCONS_00033294	0.0845825	0.0347146	0.450403	0.254399	0.699316	0.656984
TCONS_00033297	0.301231	0.240806	0.290846	0.121648	0.464245	0.605487
TCONS_00033298	0.456183	0.00232241	0.143453	0.478753	0.62138	0.780352
TCONS_00033299	0.720076	0.54065	0.000899584	0.204281	0.240035	0.067865
TCONS_00033308	0.361227	0.397161	0.714862	1.16898	1.09541	0.272238
TCONS_00033346	0.257069	0.0991793	1.46326	0	0	0
TCONS_00033349	0.322738	0.206336	1.2645	0	0	0
TCONS_00033350	2.50788	2.05012	1.39216	2.29583	1.93366	0.96419
TCONS_00033351	0	0	0	1.34159	0.94229	0.685745
TCONS_00033352	4.15643	2.24465	2.31311	5.03768	2.06773	1.25398
TCONS_00033354	0	1.04412	0	0	0	0
TCONS_00033385	11.1857	62.7566	89.475	11.1228	34.3886	58.2489
TCONS_00033389	0.581734	0.582313	0.28863	0.28665	0.594262	0.392454
TCONS_00033529	0.346756	0.422886	0.399154	0.191602	0.424106	0.0188938
TCONS_00033530	1.34578	0.79099	1.34706	1.75338	1.31211	1.96284
TCONS_00033531	1.20991	0.171187	0.333018	0.0169973	0.38478	0.552041
TCONS_00033532	0.251246	2.83493	0.317837	0.957565	0.00762252	0.152219
TCONS_00033533	1.21827	0.613855	1.43647	0.709215	1.3566	0.263199
TCONS_00033534	1.35582	0.993525	0.115939	0.68263	0.541346	0.514923
TCONS_00033535	0.657706	0.289316	0.284412	0.852073	0.681288	0.846168
TCONS_00033536	2.35055	3.39762	3.14842	2.79914	3.53002	2.72674
TCONS_00033538	1.54996	0.399759	0.590493	1.34255	0.609435	1.31094
TCONS_00033564	0.214222	0.537899	0.602663	0.124872	0.146147	0.833373
TCONS_00033648	0.261824	0.343861	0.462049	0.278156	0.828811	0.390034
TCONS_00033651	0	0.905242	0.340418	0.27582	0.177931	0
TCONS_00033732	0.348697	0	0.142226	0	3.18372	2.39337
TCONS_00033767	67.5155	121.108	89.9832	105.31	85.8592	50.623
TCONS_00033822	0	0	0.219344	0	0	0.892824
TCONS_00033823	0.301681	3.93449	6.81379	1.18279	0.276583	2.58803
TCONS_00033825	9.39532	14.51	9.42416	0.455296	6.49105	0.309045
TCONS_00033826	0	0	0	2.44051	5.18943	7.80465
TCONS_00033827	2.87227	6.9154	1.22626	0.552212	8.72469	6.26612
TCONS_00033830	0.860326	0.363649	0	0.580902	0.370614	0.162723
TCONS_00033831	0	0	0	0	0	0.96204
TCONS_00033832	0	1.13696	0.816594	0.370798	1.10475	0.0682931
TCONS_00033866	0.144421	0.202624	0.139467	0.0709045	0.00839051	0.0841045
TCONS_00033964	0.848316	0.123549	0	8.72e-06	2.12e-06	0
TCONS_00033965	0.50172	0.0448973	0.144687	0.0112026	0.0404059	0
TCONS_00033967	0.271057	0.68642	0.195301	8.59e-06	1.41e-06	0
TCONS_00033969	0.340257	0.838525	0.472574	0	8.82e-06	0
TCONS_00033977	2.96408	4.83464	5.60648	0	0	0
TCONS_00034028	2.86455	0.344427	4.08273	0.724657	0	0
TCONS_00034032	0.746143	0.107948	0.224733	0.6178	0.644409	0.352626
TCONS_00034034	0	0.592347	0.0689553	8.35e-05	0.0331625	0.0350433
TCONS_00034056	0.846756	1.08534	0.662061	0.660334	0.755233	0.422974
TCONS_00034057	0.698648	0.250241	1.50267	0.400363	3.41471	0
TCONS_00034087	0.100615	0.146554	0.103575	0.0858021	0.912408	0.0233197
TCONS_00034151	0.928465	0.97058	1.09078	0.799628	0.966438	0.851129
TCONS_00034240	0.192088	0.106006	0.0753924	0.0575083	0	0.083065
TCONS_00034242	5.83552	4.37038	1.01251	4.82014	5.48904	4.52955
TCONS_00034244	4.14156	0.161748	1.92195	1.37774	1.78907	2.4567
TCONS_00034249	9.454	6.93069	2.69496	5.79337	9.32633	7.34431
TCONS_00034250	0.0436537	0.647504	0.410525	0.822153	0.172742	0.123113
TCONS_00034251	0.255988	0.0615299	1.01914	0.894097	0.270776	0.492811
TCONS_00034253	1.46696	1.39815	1.03754	1.76434	0.196474	1.32335
TCONS_00034267	20.7555	22.0524	16.528	22.9527	17.5293	15.5693
TCONS_00034268	1.17843	1.46677	3.62862	1.55941	2.06719	1.17645
TCONS_00034314	0.212829	0.113187	0.180765	0.556669	0.865408	0.152621
TCONS_00034317	0.324201	0.0407349	0.0926473	0.0570026	0.154837	0.136214
TCONS_00034318	0.373322	0.136514	0.0757959	0.16665	0.902098	0.600853
TCONS_00034319	0.32754	0.719383	0.393408	0.336221	0.50879	0.394085
TCONS_00034320	0.0955252	0.138264	0.102401	0.104918	0.0613738	0.157907
TCONS_00034321	0.148087	0.092832	0.0917309	0.131245	0	0.0958474
TCONS_00034322	0	0.173938	0	0.263054	0	0
TCONS_00034323	0.0137419	0.0563845	0.178003	0.494058	0.164689	0.508867
TCONS_00034326	0.394707	0	0	0.122208	0.0173382	0.0340315
TCONS_00034328	7.18e-05	0.242097	0	0.221904	0.292417	0
TCONS_00034329	0	0	0.00019683	0.269916	0.11561	0
TCONS_00034330	0	1.12e-05	0.0523467	0.212595	0.00457437	0.043403
TCONS_00034373	0.562445	0	0.366136	0.410876	0.171473	0.119215
TCONS_00034411	15.988	27.2086	30.9092	14.6217	31.5206	54.6546
TCONS_00034418	0	6.3363	0	0	0	0
TCONS_00034440	20.3112	32.0582	32.0766	14.8295	48.8258	34.7253
TCONS_00034514	0.440853	0.672966	0.401079	0.491065	0.469711	0.59816
TCONS_00034515	0	0	0	0.52895	0	0.0293073
TCONS_00034516	0.210257	0	0	0.79731	1.02878	0.922581
TCONS_00034517	0.0785869	1.48514	0.321338	0.0361779	0.378435	0.523349
TCONS_00034520	0	0	0	3.22996	4.58744	5.29659
TCONS_00034645	1.69941	0.897607	1.17119	0.927732	0.396653	0.606485
TCONS_00034652	0.535525	0.288388	0.245511	0.684019	2.54181	2.43407
TCONS_00034653	0.0315503	0.0549184	1.12265	0.510201	0.0398646	0.939521
TCONS_00034685	0	0.0982944	0	0	0.480675	2.56011
TCONS_00034821	0.647899	2.81254	2.17873	2.01675	0.763467	2.73785
TCONS_00034822	0	1.23767	0.730935	0	1.37237	0.0551944
TCONS_00034824	0	0.285616	0.253769	0.328218	1.5869	0.210493
TCONS_00034825	0.338148	0.23662	0.328516	0.451669	0.140585	0.225371
TCONS_00034874	40.539	81.6515	29.5848	43.7235	21.8267	18.3516
TCONS_00034895	56.4368	30.9839	22.3956	78.355	43.5674	47.8687
TCONS_00034975	0.179789	1.09338	0.301146	0.168749	0.940854	1.03567
TCONS_00035016	0.0439158	0.356731	0.378615	0.0813092	0.537524	0.278044
TCONS_00035109	1.79078	4.08542	4.50499	3.82515	6.57064	3.34156
TCONS_00035113	0.061489	0.877342	0.842302	0.567638	0.0781023	0.140714
TCONS_00035114	2.35285	3.05896	4.04368	1.39171	2.70682	1.99716
TCONS_00035146	0.172018	0.150886	0.155869	0.21979	0.37264	0.63662
TCONS_00035147	0.109432	0.0313433	0.0696596	0.058344	0.455364	0.176342
TCONS_00035157	0.687646	0.459994	0.369899	0.941371	0.65067	0.296321
TCONS_00035158	0.78514	1.36837	0.916782	1.25459	0.430428	1.24228
TCONS_00035159	0.7341	0.584943	0.573542	0.63733	0.802259	0.098896
TCONS_00035196	0.30809	0.161803	0.193727	0.33455	0.793322	0.33112
TCONS_00035275	0.682838	0.651251	0.385645	1.07211	0.479428	0.73652
TCONS_00035276	0.0980916	0.956663	0.483721	0.830325	0.518979	0.292692
TCONS_00035278	82.8672	75.8122	51.7558	85.822	75.9919	83.5328
TCONS_00035279	0.696364	2.18342	1.48912	1.032	5.29527	1.018
TCONS_00035280	2.70531	0.408857	0.0825969	4.05014	0.354377	0.0721677
TCONS_00035281	1.8041	0.376991	0	0.0339309	0.218621	0
TCONS_00035282	0	0	0	0	0	2.17058
TCONS_00035284	0	0	0	0.196545	0.737732	0.152936
TCONS_00035425	1.91741	0.477907	0.912237	1.20427	1.34128	0.642081
TCONS_00035444	0.37572	0.60068	0.408121	0.418539	1.21483	1.76381
TCONS_00035448	8.5933	10.2503	11.5991	6.54164	13.1676	10.6038
TCONS_00035498	0.0810475	0.236614	0.291032	0.302883	0.665285	0.104756
TCONS_00035499	0.675939	0.421373	0.211674	0.0976175	0.205381	0.586797
TCONS_00035511	0	0	0	18.0149	4.78354	9.66972
TCONS_00035512	2.3458	6.33913	6.57858	3.08132	6.32007	4.64126
TCONS_00035513	1.10087	0.653724	0.50785	0.404109	0.502813	0.803689
TCONS_00035514	1.1144	0.597102	0.070285	0.23494	0.403059	0.327445
TCONS_00035542	0.652838	0.518004	0.535021	0.481706	0.661356	0.471562
TCONS_00035651	4.56902	6.75225	5.0888	6.85021	9.79125	8.06408
TCONS_00035656	1.06347	0.40743	0.489459	0.270491	0.329214	0
TCONS_00035669	0.751718	5.37677	1.07572	0.00183208	0.000526684	2.01262
TCONS_00035670	0	3.05829	0.678589	0	0	0
TCONS_00035687	0.869821	0.250608	0.35806	0.0643357	0.9086	0.435551
TCONS_00035692	0.347985	0.0349045	0	0.127611	8.73e-05	7.75e-05
TCONS_00035694	3.5e-05	0.020017	0.000127618	0.502331	0.306399	0.00410761
TCONS_00035695	0.0506032	0.0104298	0	1.00477	1.83e-05	0.0735811
TCONS_00035696	0.167232	0.438193	0.0422264	0.194241	0.0688482	0.0195168
TCONS_00035697	9.01e-06	0.0916732	0.0293399	0.0868207	0	0.00429819
TCONS_00035698	1.62162	0.21151	0.46807	0.245778	0.362192	0.0953938
TCONS_00035758	2.37962	0.513998	0.398008	2.05432	1.87976	0.985061
TCONS_00035830	0.892594	0.441285	0.274673	4.78881	3.17788	3.47327
TCONS_00035831	5.95885	12.5231	0	43.7442	16.3732	15.8906
TCONS_00035867	0.338526	0.881632	0.372244	0.0173144	2.31371	5.28688
TCONS_00035916	0	0.502984	0.452289	0.458585	0.289621	1.37224
TCONS_00035919	0	0.0796342	0	0.227095	0.310016	0.0641675
TCONS_00035927	0.00103896	0.150035	0.172048	0.0538447	0.643423	0.446837
TCONS_00035933	1.70929	2.44484	1.29504	3.15286	3.62466	2.69614
TCONS_00035943	0.219147	0.493154	0.739889	0.666653	0.35843	0.0462154
TCONS_00035944	0.279434	0.802595	0.366061	1.57976	0.231217	0.377003
TCONS_00035946	0.147049	0.662197	1.3031	0.364694	0.62	0.183477
TCONS_00035948	0	0	0	0	1.8104	0.216204
TCONS_00036006	6.63499	1.36394	1.23707	3.05493	7.78617	4.87766
TCONS_00036105	1.82483	3.17518	3.21576	1.52855	1.95272	0.991048
TCONS_00036106	28.4936	25.5833	24.2666	22.45	20.5412	3.12866
TCONS_00036129	0.626168	1.63183	0.559803	1.34722	0	0
TCONS_00036130	2.53597	1.52363	2.19931	0.958331	1.08276	2.36202
TCONS_00036131	0.42572	0.747992	1.53007	0.859879	0.288394	0
TCONS_00036133	6.44243	3.29184	3.84175	5.13263	5.93443	5.92799
TCONS_00036254	0.655338	0	0.0806356	2.46146	0.359563	0
TCONS_00036331	0	0.512222	0	0.00868744	0.0142347	0
TCONS_00036333	0	0	0	0.0552647	0.352567	0.00540884
TCONS_00036334	3.88106	3.73665	2.60234	1.24555	2.56926	1.57385
TCONS_00036335	0.654946	0	0.776047	0	0.34747	0.96602
TCONS_00036336	0.218723	0	0.0908566	0.157851	0.498104	0.10577
TCONS_00036337	5.53157	10.0894	7.47218	5.41856	3.24115	3.57826
TCONS_00036338	13.647	13.4836	10.987	6.91256	2.65702	2.40142
TCONS_00036339	0.133788	0.0434654	0.172597	0.121249	0	0
TCONS_00036340	1.6113	1.76554	0.753385	0.7158	0.259193	1.30107
TCONS_00036368	0.345569	0	1.36117	0.41338	0.894348	0
TCONS_00036369	0	0	0	0	0.703952	3.52861
TCONS_00036370	4.52715	6.90871	4.3439	3.54896	2.2747	2.50897
TCONS_00036395	1.10819	2.14143	3.13935	1.32119	0.569067	2.106
TCONS_00036396	1.54434	1.38613	0.679942	1.58996	1.80527	1.07781
TCONS_00036398	2.32537	1.49506	1.00689	0.891168	2.07604	0.194197
TCONS_00036427	4.29451	3.48871	4.51761	4.07075	3.16579	2.02728
TCONS_00036495	20.0405	15.4619	9.25257	27.0061	15.8572	10.8259
TCONS_00036546	0.609654	5.74e-06	0.167153	8.01e-05	0.060464	1.23e-05
TCONS_00036547	1.81807	0.468486	0.712372	1.64173	0.751956	0.701617
TCONS_00036548	0.0659739	0.0366754	0	0.280339	1.03e-05	0.0271843
TCONS_00036549	0.0147305	2.44e-05	0.000100288	0.551361	0.156595	0
TCONS_00036550	0.249232	0.872393	0.621031	0.223902	0.600535	0.408313
TCONS_00036551	0.662819	0.221002	0.128686	1.58459	0.591116	0.540636
TCONS_00036573	0.0377038	0.0200425	0.0707403	0.0700803	0.0872617	0.0342928
TCONS_00036581	9.55398	4.50399	0.112659	8.30589	0.89386	0
TCONS_00036608	0.709375	7.34254	20.0542	2.05551	19.5516	5.41574
TCONS_00036611	2.21488	1.83949	2.05798	0.0380103	0.222669	0.361244
TCONS_00036662	181.909	187.799	130.219	166.358	148.996	122.386
TCONS_00036663	0	0	0.192663	0.248241	1.12675	1.96593
TCONS_00036665	0.748884	1.32731	1.67472	0.741792	1.84155	8.18385
TCONS_00036690	0.711558	0.818659	0.183771	0.167747	0.165855	0.573751
TCONS_00036693	0.523082	0.140523	0.16858	0.392945	8.51e-05	4.75e-05
TCONS_00036694	0.101695	0.167596	0.320221	1.11907	0.564717	0.298078
TCONS_00036695	0.147079	0.543451	0.224482	0.562455	0.504755	0.201868
TCONS_00036717	8.56164	19.8683	19.1126	15.9403	9.54014	14.7444
TCONS_00036732	0.150286	0.156322	0.0417603	0.201754	0.21338	0.129013
TCONS_00036735	0.160503	0	0.076499	0.170285	0	0
TCONS_00036739	0.660584	0.149433	0.563518	0.478843	0.0904351	0.624684
TCONS_00036742	0.10868	0.192652	0.0301897	0.175146	0.249153	0.21218
TCONS_00036744	0.119617	0.0231126	0	0.0552159	0.0919714	0.100126
TCONS_00036745	7.69e-05	0.222162	0	0.0548999	5.62e-05	0.0117204
TCONS_00036748	0.0460262	0.192886	0.0931263	0.416076	0.145178	0.183512
TCONS_00036761	0.328596	0.13113	0.143546	1.17112	0.0444111	0.237815
TCONS_00036764	0.0679457	0.0871207	0	0.16858	1.21e-06	0.0375429
TCONS_00036829	0.212674	0.226308	0.219983	0.84795	0.462958	0.334216
TCONS_00036830	0.227121	0.112225	5.71e-06	0.32668	0.0774622	0.22955
TCONS_00036865	0.693819	1.24641	0.187127	2.39825	1.32482	1.27979
TCONS_00036866	0.458197	1.21631	1.28424	2.9646	2.85243	3.37242
TCONS_00036887	2.15326	1.40257	1.59366	2.06417	1.7359	2.2334
TCONS_00036943	25.0001	25.731	18.4391	0.880862	0.127887	0.27873
TCONS_00037074	0.0209491	0.0502574	0.00665258	0.148141	0.154953	0.0197157
TCONS_00037170	2.40495	1.01845	1.75633	2.33048	2.03654	2.32948
TCONS_00037172	0.952116	1.31961	1.9153	1.41112	1.43032	1.28744
TCONS_00037173	1.29666	1.90365	0.51587	1.0998	0.880325	0.887791
TCONS_00037174	0.941128	0.862086	0.691969	0.95536	0.438737	1.17841
TCONS_00037201	0	0	0	0	0.757524	0.148481
TCONS_00037202	0.69154	4.93171	3.00391	6.58706	7.48813	7.37686
TCONS_00037203	18.6231	19.5848	4.88412	2.83325	11.0452	10.2624
TCONS_00037204	8.611	15.4884	13.5098	11.4391	11.7104	10.3573
TCONS_00037205	0.156935	0.643232	0.0916487	0.181057	1.46118	0.493218
TCONS_00037206	1.19697	7.55352	0	0	0	0.286851
TCONS_00037207	10.8692	2.84844	2.50551	5.85998	8.60312	0.529168
TCONS_00037208	0.565073	0.388564	1.30068	0.692231	0.550372	1.28112
TCONS_00037209	0.030382	0.147178	0.179837	0.159883	0.217311	0.957217
TCONS_00037214	0.747733	0	0	0.0564105	0.493392	0.601685
TCONS_00037215	0.0743709	0.0775725	0	1.01885	0.684295	1.55734
TCONS_00037216	0.308544	0.500206	0	0.108907	0.380065	0.791702
TCONS_00037218	3.89916	0.523109	1.6123	1.10493	0.671326	2.36398
TCONS_00037219	7.54263	7.24346	5.37737	8.20231	10.1362	8.44543
TCONS_00037276	1.36912	1.79441	3.64165	0.649968	1.49789	1.33303
TCONS_00037288	0.272889	0.32961	0.224991	0.273134	0.365936	0.392913
TCONS_00037317	3.27469	3.71706	2.87879	4.03353	4.28125	3.09134
TCONS_00037329	1.29092	0	0	0	0	0
TCONS_00037333	0	0	0.174612	0	0	1.49279
TCONS_00037447	5.91455	13.226	8.38296	10.1143	8.06646	6.09623
TCONS_00037459	0.546425	1.47783	0	0.483185	1.00268	1.17315
TCONS_00037460	3.98867	2.32081	1.65525	5.61228	1.68084	3.53278
TCONS_00037461	0	0.554051	0.215536	0.885089	0.709781	0.200093
TCONS_00037462	0	13.7192	0	0	0	0
TCONS_00037463	1.18854	0.561197	0.185215	1.66455	0.779259	0.620794
TCONS_00037465	4.80584	0.275524	0.948462	0	0.111103	2.16943
TCONS_00037491	8.19116	7.86118	5.98061	10.7537	7.25195	7.5133
TCONS_00037611	0	0	0	0.0256153	0	0.982773
TCONS_00037822	2.41533	2.66193	3.74325	0.731263	4.02656	5.52929
TCONS_00037823	0.581358	0.852207	0.515287	0.245795	1.07438	0.213356
TCONS_00037824	6.90571	8.60437	12.1304	9.63725	10.4394	15.578
TCONS_00037967	3.89954	2.87743	2.50836	1.95899	4.3115	5.59546
TCONS_00037968	2.75161	3.48986	2.75451	2.4748	2.08202	2.09513
TCONS_00037977	1.08691	1.0173	1.28252	1.66281	0.980898	0.518254
TCONS_00037978	0.320372	0.000687363	0.229981	0.674491	0.0969053	0.118693
TCONS_00037979	2.30194	1.23583	0.45074	1.54924	0.899328	1.06335
TCONS_00037980	0.482508	0.919075	0.833877	0.187426	0.298841	0.314161
TCONS_00038017	0.74326	2.49768	1.50242	2.43784	2.94433	3.5102
TCONS_00038068	17.1034	62.8862	64.9714	29.4674	53.6716	48.4893
TCONS_00038118	1.17992	0.637538	0.515336	0.838383	0.00466869	0.957366
TCONS_00038119	1.65562	2.0381	0.229125	1.72852	1.10481	0.368503
TCONS_00038121	0.845881	0.127379	0.612811	0.19283	1.33325	0.263348
TCONS_00038122	0.149176	0.173613	0.389959	0.280235	0.405745	0.244173
TCONS_00038123	1.98206	0.575505	0.815224	2.04893	0.146983	0.106678
TCONS_00038158	0.168666	0.600059	0	0.202143	0.267166	0.0354148
TCONS_00038203	0	0	0.192283	0	0.471193	0.695435
TCONS_00038249	0.440114	0.276294	0.106462	0.130338	0.383402	0.0146713
TCONS_00038250	1.51479	0.300589	0.161738	0.114787	0.84087	0.0173397
TCONS_00038251	0.50175	0.205635	0.0892851	0.0992296	0	0.407436
TCONS_00038252	2.16189	1.44561	3.48032	2.35839	0.670246	0.947671
TCONS_00038280	0.432898	0.317001	0.0236017	0.0907426	0.199777	5.04e-05
TCONS_00038282	0.0188645	0.267851	0.0502892	0.0507122	0.254596	0.36789
TCONS_00038283	0.174842	0.099094	0.327579	0.108322	0.0475006	0.434086
TCONS_00038285	0.0955805	0.194901	0	0.361622	0	0
TCONS_00038287	0.437816	0.429966	0.421106	0.215524	0.0919269	0.0570008
TCONS_00038288	0.126589	0.0315363	0	0.188407	0	0
TCONS_00038290	0.411865	0.674313	1.20791	0.943708	1.69502	0.841103
TCONS_00038315	4.35e-05	0.0529925	0.000325152	0.609023	0.0426146	0.0748971
TCONS_00038316	0.575673	0.299647	0.25997	0.679492	0.471768	0.649356
TCONS_00038317	3.95671	3.17429	3.45333	1.74104	1.08536	2.42853
TCONS_00038318	0.348067	0.353613	0.332027	0.962428	1.09133	0.0160215
TCONS_00038322	0.425966	0.260053	0.433771	0.104601	0.644056	0.246586
TCONS_00038323	0.778723	0.614875	0.387223	0.193141	0.535351	1.74191
TCONS_00038325	1.70236	3.87774	0.200439	4.23284	2.01035	1.38292
TCONS_00038335	0.193229	0	0.455853	0.505641	0.229169	0.970644
TCONS_00038336	0	0	0	0	0	2.3329
TCONS_00038337	0	0	0.230269	0.650206	0	0
TCONS_00038338	1.96929	0	0	0	0.478029	0
TCONS_00038339	7.08431	3.66477	4.1437	1.71066	4.71967	2.58728
TCONS_00038340	8.18174	6.28452	16.0207	5.44742	7.21994	15.4565
TCONS_00038341	2.2956	7.31711	0	1.49551	0	0.741077
TCONS_00038342	0.519767	3.14611	0	1.15432	0.601456	0.0918434
TCONS_00038344	3.7564	1.01673	0	0.825709	1.55972	2.07861
TCONS_00038345	0.0351708	0	0	0	0.439944	1.67032
TCONS_00038346	0	3.54126	0.278197	0.142367	0	0.386189
TCONS_00038348	1.31213	0.41442	0.282293	1.19866	0.748101	0.573638
TCONS_00038349	0	13.1441	0	0	0	0
TCONS_00038360	29.5612	11.092	6.22099	9.33438	4.6305	3.6808
TCONS_00038361	67.5742	64.9153	51.4789	51.1258	49.4156	51.438
TCONS_00038362	25.414	28.4224	26.5167	21.0011	18.3587	19.4389
TCONS_00038363	2.85536	2.07319	2.38069	6.27694	1.54975	3.49067
TCONS_00038395	0.797833	1.78323	1.75501	2.5542	4.42703	2.3037
TCONS_00038464	1.87961	11.7403	9.16611	2.89511	16.8824	3.15068
TCONS_00038465	1.68775	13.4507	8.98748	2.78086	11.947	5.10197
TCONS_00038469	18.6428	117.916	86.6325	0	0.0202221	0.197616
TCONS_00038470	35.6254	161.223	253.953	16.97	81.8573	234.89
TCONS_00038471	99.6747	683.786	1112.38	95.2058	585.749	2657.67
TCONS_00038477	5.83845	24.947	60.4557	3.52704	36.2315	259.433
TCONS_00038480	1.06546	1.07011	0.456095	0.00817741	0.03059	3.33e-07
TCONS_00038572	0.55126	0.338503	0.327038	0.449129	0.563119	0.472123
TCONS_00038573	18.8349	11.9618	9.37656	18.9662	9.58225	6.61663
TCONS_00038736	0.241203	1.13448	0.442755	1.92245	1.07107	1.68844
TCONS_00038775	0.403185	0.287771	0.703687	0.159181	0.39577	1.81463
TCONS_00038812	1.33008	2.24353	1.64389	2.82982	4.16009	3.17988
TCONS_00038851	0.437253	1.44741	0.0106587	0	0.0711561	6.5e-06
TCONS_00038852	0.0120953	0.360328	1.57337	0	2.61e-05	3.87e-07
TCONS_00038853	0	0.104156	0.830771	0	0.0321192	0.124856
TCONS_00038869	1.23241	0.0544917	0.0901983	0	1.27405	0.730273
TCONS_00038870	1.06834	2.5882	3.09944	1.54021	4.62188	11.6677
TCONS_00038871	0	0.615092	0.0734637	0.440221	0.437481	3.78
TCONS_00038872	1.25759	2.86525	4.41508	0.168238	1.22527	0
TCONS_00038873	11.6258	2.53391	0.679663	0	0	1.87585
TCONS_00038875	1.90439	0	0	0.86857	0.0755927	0.0825115
TCONS_00038876	0.0427146	0.510709	0.167267	0	0	0
TCONS_00038877	0.62084	0	3.21486	0	0	0
TCONS_00038889	1.20441	0.198066	0.00026217	0.142307	0.413329	0.493791
TCONS_00038890	2.05463	9.40272	6.46399	5.22499	7.90751	6.21253
TCONS_00038891	0.212275	0.165592	0.273587	0.340699	0.372028	3.88e-05
TCONS_00038892	0.241136	0.609187	1.15739	0.270931	0.218711	0.458754
TCONS_00038893	6.68048	4.41325	2.92111	4.49991	5.59561	4.92134
TCONS_00038896	0.214035	0.726622	0.774301	2.51537	1.47323	1.13988
TCONS_00038901	0.456232	0.225629	0.0168049	0.107854	0.117422	0.472195
TCONS_00038902	1.11177	1.32241	1.23545	1.78122	1.16823	0.601373
TCONS_00038903	1.0273	1.12992	0.42714	0.892562	0.639725	0.437311
TCONS_00038991	0.194911	0.17329	0.0660138	1.08103	0.522154	0.0334799
TCONS_00039003	0	0	0	0.159195	1.33273	0.932705
TCONS_00039004	0	0	0	0.220935	2.03161	0
TCONS_00039005	0	0	0.107226	0	0	2.17552
TCONS_00039006	0.063293	0.291758	0.261485	1.20155	0.66754	1.16753
TCONS_00039007	0.654656	0.763022	0.763831	1.02418	0.664543	0.787102
TCONS_00039008	7.2957	2.77079	8.87193	11.6206	5.65188	13.5374
TCONS_00039009	0	0.357311	2.61404	0.130313	3.50946	0.798732
TCONS_00039022	0.25394	0.571635	1.11377	0.227278	1.02607	0.537065
TCONS_00039049	1.45849	3.8605	2.74885	1.26759	1.58535	2.27401
TCONS_00039050	0.898499	0.331653	0.0434065	0.472677	0.308978	0
TCONS_00039131	1.11958	1.42231	0.0836314	0.486413	1.1601	0.20768
TCONS_00039132	12.9627	11.7573	12.7006	12.8388	11.0967	8.97165
TCONS_00039133	1.63242	2.10427	0.821524	2.117	1.4987	1.82706
TCONS_00039146	0.435969	0.903439	0.654111	0.566314	1.23104	0.42318
TCONS_00039147	0.760833	0.287846	0.132309	0.413599	0.338642	0.805178
TCONS_00039150	0.311616	0	0.116782	0.278865	0.062964	0.703371
TCONS_00039152	1.09698	0	0.044609	0.601099	0	0
TCONS_00039153	0.455007	0.392438	1.121	1.12246	1.85041	0.951273
TCONS_00039154	0.299134	0.130961	0	0	0.126364	1.13722
TCONS_00039155	1.01823	0	0	0	0.142902	0
TCONS_00039224	2.24356	3.49747	2.26165	4.13038	3.05461	2.47769
TCONS_00039227	0.0101657	8.00537	6.76039	6.86669	2.24614	2.79168
TCONS_00039369	0.37091	0.764884	0.0886459	0.823752	0.78394	0.258376
TCONS_00039370	2.31047	0.346961	1.0157	3.185	1.6013	2.4889
TCONS_00039372	0.000867937	0.345454	0.249543	0.240348	0.399994	0.238015
TCONS_00039384	0.0552094	0.00729815	0	0.160377	0.648815	0.0404606
TCONS_00039385	0	0	0	0.719934	0.265529	0.042295
TCONS_00039386	0	0.00753593	0	0.387394	0.317054	0.0951759
TCONS_00039534	0.334397	1.58045	0.0765817	0.518868	1.84896	0.77512
TCONS_00039535	0.907742	2.67881	0.284424	0.649443	0.553744	0.230013
TCONS_00039536	0.339439	0.265399	0.159154	0.340501	0.486149	0.82095
TCONS_00039537	0	0.0656303	0.278243	0.136694	0.726381	0.544607
TCONS_00039538	0.557955	0.401594	0.8054	0.173244	0.555885	1.04142
TCONS_00039556	11.228	4.58603	6.5121	11.8323	4.79258	5.15142
TCONS_00039573	0.0451164	0.255658	0.159022	0.457562	0.225455	0.336466
TCONS_00039574	0.917171	0.605095	0.331483	1.35655	1.43613	1.38786
TCONS_00039575	0.0517968	0.832433	0.980461	0.761925	1.24927	0.145593
TCONS_00039854	0.728567	0.819027	2.3229	0.94503	1.07157	1.18898
TCONS_00039860	0	0	0	0.524632	2.78566	4.7542
TCONS_00039861	0	0	0	0.875881	0.120294	0.0230117
TCONS_00039862	1.25055	0.366889	0.96996	1.10652	1.17054	2.18941
TCONS_00039863	0.53663	0.278734	0.147733	0.0532918	0.6732	1.18379
TCONS_00039872	0.436759	2.62258	1.41519	4.02615	1.10653	1.47588
TCONS_00040110	0.651775	0.0626169	0.0659737	0.232958	0.04012	0.429635
TCONS_00040111	0.0996398	1.35921	0.921363	0.979257	0.0798648	0.639148
TCONS_00040122	12.4416	8.35642	4.78451	10.7946	7.85142	4.18707
TCONS_00040306	0.240475	0.090184	0.251967	0.977568	0.038025	0.0415053
TCONS_00040308	1.36161	1.10723	0.167916	0.45211	1.22502	0.195602
TCONS_00040309	5.02878	5.00225	1.75384	4.09338	2.53412	1.96738
TCONS_00040310	0	0	0	4.59701	0	0.233189
TCONS_00040311	0.0679847	0	0	0.616193	0.414973	0.383243
TCONS_00040312	1.11383	0.263148	0.418314	0	0	0
TCONS_00040346	0.0626974	0.0603456	0.0140655	0.433375	0.141097	0.0205389
TCONS_00040368	0	0	0	0.115938	0.0434568	0.893047
TCONS_00040382	1.17611	0	0	0.407773	0	0
TCONS_00040433	0	1.97151	0	0	0	0
TCONS_00040544	2.99458	1.57868	3.44998	0.726127	1.62241	2.12159
TCONS_00040548	0.899362	2.72585	3.65377	0.130665	1.65933	3.88491
TCONS_00040549	0.767662	1.16831	0.445581	1.40359	0.629147	0.072797
TCONS_00040555	1.42412	2.93266	3.2778	1.6088	2.34681	1.81647
TCONS_00040672	8.2437	5.16908	7.98732	9.39758	2.21858	6.44321
TCONS_00040765	1.38742	2.63366	2.27541	3.13622	3.1998	0.868792
TCONS_00040866	0.741514	2.2428	1.36587	2.22895	2.1818	1.89663
TCONS_00040871	0.279375	0	0.0167592	1.33569	0.860721	1.24306
TCONS_00040875	0	0	0	4.15175	4.11581	0.388859
TCONS_00040911	0	0.0799823	0.257643	0.73206	0.116981	0.0538911
TCONS_00040940	1.0101	0.293255	0.638406	0.789238	0.544331	0.107015
TCONS_00041120	0.544141	0.97271	1.31414	0.553808	0.55862	0.153687
TCONS_00041121	0.783508	1.29724	0.814823	0.626362	0.48074	0.311405
TCONS_00041122	1.30523	1.84619	2.58696	1.80146	2.38184	1.85044
TCONS_00041158	1.25274	0	0.202752	1.20745	0.427196	0.381144
TCONS_00041178	1.14848	0.712222	0.142951	0.903757	0.482767	0.143333
TCONS_00041448	1.1303	1.74773	3.57109	0	0	0
TCONS_00041450	0.503374	1.5884	3.15e-05	0	0	0
TCONS_00041459	0.0235618	0.0391133	0.016114	1.78917	1.05523	0.238898
TCONS_00041460	0	0	0	0.949678	0.444372	0.448981
TCONS_00041461	0.346606	0.405397	0.52805	0.554592	0.982452	0.641199
TCONS_00041463	0.0706444	0.373797	2.55653	0.0786717	0.223757	0.698823
TCONS_00041464	0.130363	3.35676	0.612103	0.0725765	1.4264	0.660405
TCONS_00041466	4.53132	0.510438	0.725779	0.353951	0.635811	1.81375
TCONS_00041468	0.127339	0.646157	0.261059	0.561281	1.39316	0.284007
TCONS_00041469	0	1.19931	0	0	0	0
TCONS_00041470	0.130815	0.706148	0.19161	1.61037	1.38318	1.58841
TCONS_00041527	0.120142	0.155644	0.522418	0.391756	0.379477	0.753197
TCONS_00041529	0.0300852	0.432151	1.12939	0.207097	0.315841	0.0899291
TCONS_00041628	28.3379	31.8917	26.5263	23.4567	25.2336	27.4395
TCONS_00041675	0	0.60271	1.4748	0.424224	1.00601	0.998577
TCONS_00041676	0	0	0	2.72651	0	1.777
TCONS_00041678	2.68274	0.708769	0.955727	1.29106	0.469501	1.44291
TCONS_00041679	1.49465	1.73916	0.893079	1.05695	1.81164	0.962445
TCONS_00041732	0.473709	0.00381339	1.07255	0.200655	1.10447	0.353113
TCONS_00041733	0.541036	0.335251	0.848512	0.190544	0.326428	0.325436
TCONS_00041734	0.00620759	0.071824	0.0544463	0.275825	0.791613	0.207156
TCONS_00041772	1.34292	0.142605	0.114916	0.115885	0.50862	0.88246
TCONS_00041776	0.495523	1.96851	2.50565	0.213773	0.344568	0.0233256
TCONS_00041779	0.102595	0	0.0399509	0.625096	0.806385	3.25714
TCONS_00041822	0.112427	0.0403814	0.0310767	0.485692	0.125762	0.0263279
TCONS_00041823	0.331509	0.111415	0.125875	0.508897	0.666381	0.119701
TCONS_00041824	0.513649	0.309102	0.251384	0.954012	0.631839	0.929044
TCONS_00041825	0.215957	0.440789	0.257678	0.140998	0.525696	0.56111
TCONS_00041826	0.184808	0	0	0.221406	0.174806	0.154401
TCONS_00041827	4.5e-05	0.0608847	0.145937	0.205984	0.16441	0.246585
TCONS_00041829	0.111001	0.291983	0.111424	0.215397	0.296747	0.146548
TCONS_00041830	1.13245	0.47869	0.0413181	1.41462	0.843594	0.418827
TCONS_00041831	0.130073	0.140535	0.105216	0.421624	0.308577	0
TCONS_00041832	0.695029	0.411657	0.266164	1.20001	1.47124	0.492507
TCONS_00041834	0.0718988	0	0.25698	0.139026	0.0966218	0.104783
TCONS_00041836	0.0158339	0.0931379	0	0.0987589	0.0181837	0.0665056
TCONS_00041837	0.0152192	0.586726	0.17556	0.621999	0.112914	0.510266
TCONS_00041838	0.0879487	0.407913	0.000871648	0.103533	0.139762	0.204071
TCONS_00041839	0.677798	0.394006	0.227324	0.841584	1.52755	0.785329
TCONS_00041841	0.0139588	0.0354374	0.0864204	0.0668878	0.0877901	0.0308042
TCONS_00041842	1.75268	0.921273	0.26775	1.34861	1.35221	0.452135
TCONS_00041844	2.22689	0.75633	0.469918	0.920028	1.44355	1.77058
TCONS_00041846	0.14857	0.154141	0.384458	0.180637	0.926007	0.372884
TCONS_00041848	0.00213249	0.346426	0	0.0623587	0	0.133413
TCONS_00041873	0.454045	0.204887	0.393107	0.292551	1.4853	0
TCONS_00041874	1.0028	0.62186	1.29305	0.524222	0.52359	0.426238
TCONS_00041875	3.34263	1.60114	1.02811	0.434112	1.13444	0.434385
TCONS_00041887	0.420464	0.322876	0.172678	0.417121	0.0515524	0.532655
TCONS_00042007	2.18687	5.76217	5.00947	2.36265	1.64348	3.23816
TCONS_00042042	0.222795	0.251021	0.342473	0.794758	0.0813799	1.14523
TCONS_00042043	1.09253	0.376919	0.302517	0.36228	0.499369	0.199697
TCONS_00042044	0.416045	0.928131	0.544521	1.1844	1.02204	0.622212
TCONS_00042056	0.493272	0.554361	0.224271	0.193779	0.218272	0.13539
TCONS_00042057	0.218666	1.01822	0.76096	0.807221	0.300287	0.599871
TCONS_00042059	1.12451	0.490909	0.238246	1.28155	0.0753911	0.597362
TCONS_00042145	0.349505	0.0202757	0.0325543	0.686211	0.020162	0.0222729
TCONS_00042146	0.619457	0.0415751	0.12609	0.543235	0.0188948	0.170235
TCONS_00042147	0.0740615	0.0139179	4.69e-06	0.123298	0.0399459	0
TCONS_00042148	0.986511	0.0327518	0.274189	0.373776	0.0548018	0.000574578
TCONS_00042177	0	0	0	0.762951	1.36565	0.564467
TCONS_00042193	0.0905135	0	0	0	0.154609	2.15794
TCONS_00042194	0.868005	0.337242	0.246174	0.234046	0.217148	0.178608
TCONS_00042196	0	0.108771	0.553148	0.0210992	0.496079	0.127656
TCONS_00042197	0.154414	1.01974	1.69558	0.210713	1.71829	0.599655
TCONS_00042309	1.04333	0.589818	1.26526	3.94505	1.48157	0.891595
TCONS_00042311	0.0776821	0.0370388	0.34346	1.41711	0.560393	0.143915
TCONS_00042410	5.54547	2.45735	4.49012	6.06659	0.524738	0.552122
TCONS_00042411	1.20108	0.550223	0.12391	0	0	0
TCONS_00042413	0.458828	0.297456	0.613566	0.773098	0.698559	0.535465
TCONS_00042709	0	0.0777675	0.0930453	0	0	0.689897
TCONS_00042710	0	0	0	0	0	0.918438
TCONS_00042791	2.1887	4.34048	5.20953	2.51927	3.54792	2.45421
TCONS_00042793	0.918267	0.0618993	0.231152	1.0985	0.294234	0.603281
TCONS_00042894	0.765893	0.418787	0	2.0521	1.47876	0
TCONS_00042895	0.174858	0.0202944	0.27194	0.531082	0.149739	0.206833
TCONS_00042896	6.37742	1.2173	0	2.75661	0.557672	3.19547
TCONS_00042897	0	0.0697258	0.183274	0.51105	0	1.17549
TCONS_00042931	1.48423	0.408122	0.0252001	1.87189	0.39563	0.0354805
TCONS_00043117	0	0	0	1.49728	11.1615	4.16967
TCONS_00043118	1.77297	0.41841	0.303452	0.485947	0.569308	0.172081
TCONS_00043119	1.53854	1.69427	1.11588	3.30716	3.45594	0.748981
TCONS_00043121	4.46775	5.48647	1.5609	3.3924	2.69316	2.37152
TCONS_00043122	2.77981	2.25141	2.6419	4.32834	2.63811	8.4929
TCONS_00043123	5.72213	8.13223	4.61705	8.20209	5.21759	10.9819
TCONS_00043124	2.43241	1.99777	1.55037	2.56189	2.73181	4.48623
TCONS_00043125	1.65573	2.08214	0.880727	2.34427	1.45581	1.25352
TCONS_00043126	0.617604	0.946664	1.11693	0.75962	0.91467	4.9117
TCONS_00043127	0.046819	0.832282	0.595171	1.05739	1.67066	0.465917
TCONS_00043141	0	0	0	0.693193	0.463424	0.49369
TCONS_00043142	0	0	0	0.02821	0.144866	0.790069
TCONS_00043172	0.675773	0.642753	0.582209	1.16182	1.82015	1.17269
TCONS_00043173	1.14104	2.37752	2.52098	3.45949	1.90502	2.82697
TCONS_00043174	0.000324961	0.337796	0.491928	0.401382	0.105464	0.494037
TCONS_00043175	0.419085	0.301754	0.423131	0.295074	0.763495	0.315086
TCONS_00043261	0	0	0	0.61846	0.359169	0.224
TCONS_00043262	0	0	0	0.433866	0.64848	0.494134
TCONS_00043263	0	0	0	0.817456	0.368186	0.338377
TCONS_00043285	0	0.0118623	0.0595497	0.00109292	0.167198	0.696556
TCONS_00043288	0	0.245426	0.963317	0.00812148	0.698587	0.060644
TCONS_00043289	0	1.02e-05	0.960788	3.2e-06	1.7889	2.46919
TCONS_00043322	0	0.0448331	0.615071	0.0771031	0.311481	0.410884
TCONS_00043323	0	0	0.183178	0.0730307	0.0758162	0.88611
TCONS_00043324	0.184746	0.0204643	0	0.107124	0.158152	0.548819
TCONS_00043325	0	0	0	0	0.347784	1.7268
TCONS_00043326	0.184477	0	0.0514965	0	0.173251	0.761843
TCONS_00043327	0.903771	3.88165	0.920798	0.705906	2.29656	1.55749
TCONS_00043328	0	0	0.0617291	0	0.843056	0.120427
TCONS_00043329	0.630887	0.481031	0.805638	0.443894	0.387033	0.0817602
TCONS_00043341	0	0.0551984	0	0.0645401	0.534129	0.124163
TCONS_00043342	0	0	0	1.71e-06	0	0.525859
TCONS_00043343	0.28253	0	0	0.0441371	1.62772	0.410701
TCONS_00043359	0.00756254	0.67401	0.00625728	0	0	0
TCONS_00043360	0	0.275212	0.604147	0	0	0
TCONS_00043368	0.338489	0.754802	0.530508	0	0	0
TCONS_00043376	0.726203	0.0615235	0.225925	0	0	0
TCONS_00043378	1.36509	0.573824	0.687821	0	0	0
TCONS_00043382	0.56838	0	0	0.226761	0.24919	0.120616
TCONS_00043492	0.719438	1.75207	1.26123	0	0	0
TCONS_00043564	10.348	15.6992	14.9422	16.2431	16.4889	8.70116
TCONS_00043599	0.23014	0.0737525	1.05813	0	0	0
TCONS_00043600	0.568054	0.937036	0.469292	0	0	0
TCONS_00043626	0	0	0	28.1516	22.3874	11.5886
TCONS_00043627	0	0.122078	0	2.21973	4.02293	1.497
TCONS_00043799	0	0	0	1.73966	3.54498	2.80225
TCONS_00043800	0	0	0	3.45504	1.71554	4.48034
TCONS_00043807	0.99667	2.08729	2.76978	1.20604	0.333719	2.24001
TCONS_00043819	1.36931	1.56535	1.12623	0	0	0
TCONS_00043820	0.640705	0.633398	0.454648	0	0	0
TCONS_00043889	1.47811	1.85171	1.72176	2.51831	2.83946	3.97754
TCONS_00043890	0.0711951	1.90443	1.81129	0.831343	1.29531	0.946502
TCONS_00043940	0.475355	0.0982806	0.28793	0.113269	0.136223	0.53629
TCONS_00044022	0.888555	0.182659	0.383901	0.224724	0.784204	0.782091
TCONS_00044024	0.66338	5.2132	2.9912	2.85877	0	0
TCONS_00044073	0.1763	0.0212268	1.72e-05	0.138915	0.0815429	0.24941
TCONS_00044075	0.000685577	0.004053	0.317528	0.17519	0.119772	0.0931704
TCONS_00044077	0.00413724	0.137998	0.0758702	0.0579537	0	0.130388
TCONS_00044078	0.577028	0.736365	0.300682	0.486238	0.0769807	0.806845
TCONS_00044079	0.364033	0.00279443	0.247447	0.057568	0.408676	0.142626
TCONS_00044080	0.200426	0.190257	0.152442	0.277839	0	0.246205
TCONS_00044081	2.0548	1.39561	1.37511	2.47682	3.12277	3.59803
TCONS_00044082	0.065308	0.18591	0.304152	0.25961	0	0.0895871
TCONS_00044083	0	0.142486	0	0.211152	0	0
TCONS_00044084	8.86e-05	0.368158	0.0819805	0.0549035	0.259309	0.0300211
TCONS_00044151	9.17977	12.1139	10.2159	11.8344	5.7826	1.76747
TCONS_00044152	95.2884	76.4841	77.417	82.985	66.6476	72.9335
TCONS_00044153	0	8.58858	0	2.69408	0	5.97793
TCONS_00044225	3.95455	3.08151	3.39722	4.21208	2.99861	6.42264
TCONS_00044429	0	0.075215	0	1.50564	3.73722	2.08781
TCONS_00044486	3.18582	0	0	0.158069	1.11827	0.796684
TCONS_00044487	8.54385	0	3.03165	0	1.27456	0.531972
TCONS_00044488	0.123259	0	0.0909986	0.260203	0.518426	0.0583376
TCONS_00044489	5.23965	0.391264	0.268484	0	0	0
TCONS_00044490	0.112933	0.0490548	0.0171792	0.403446	0.523766	0.657935
[truncated: 7,416 more rows]
