# Supplementary material for: Transcriptome Screening of Long Noncoding RNAs and Their Target Protein-Coding Genes Unmasks a Dynamic Portrait of Seed Coat Coloration Associated with Anthocyanins in Tibetan Hulless Barley
Source: Int J Mol Sci. 2023 Jun 24;24(13):10587. doi: 10.3390/ijms241310587 (PMC10341697; doi:10.3390/ijms241310587)
Supplement: Supplementary file 1 [file ijms-24-10587-s001.zip › Table S7. FPKM values of DElncRNAs in Tibetan hulless barley seed coats.xlsx]

## Sheet: Sheet1
Table S7. FPKM values of DElncRNAs in Tibetan hulless barley seed coats.
test_id	sample_1	sample_2	value_1	value_2	log2(fold_change)	test_stat	p_value	q_value	significant
TCONS_00115384	PC1	WC1	45.878	0.342332	-7.06626	-4.55595	0.00015	0.00295356	yes
TCONS_00089058	PC1	WC1	31.8131	1.26247	-4.6553	-1.85257	0.00095	0.0148168	yes
TCONS_00178074	PC1	WC1	0.893043	0.0458035	-4.2852	-2.32053	0.00045	0.00778222	yes
TCONS_00141819	PC1	WC1	4.75224	0.320542	-3.89002	-2.43271	0.00215	0.0294176	yes
TCONS_00125359	PC1	WC1	16.8916	1.33467	-3.66175	-2.33395	0.00035	0.00624916	yes
TCONS_00170143	PC1	WC1	1.05782	0.0845798	-3.64464	-2.32663	0.0007	0.0114022	yes
TCONS_00036694	PC1	WC1	1.11907	0.101695	-3.45998	-0.504337	0.0036	0.0448229	yes
TCONS_00108306	PC1	WC1	10.6411	0.982467	-3.43709	-2.57276	5e-05	0.0010838	yes
TCONS_00162132	PC1	WC1	8.41296	0.795853	-3.40204	-2.5946	5e-05	0.0010838	yes
TCONS_00048232	PC1	WC1	2.95835	0.308978	-3.25921	-1.95794	0.00085	0.013489	yes
TCONS_00021657	PC1	WC1	2.4961	0.282171	-3.14504	-1.89474	0.0026	0.0344151	yes
TCONS_00092629	PC1	WC1	5.3572	0.640681	-3.0638	-2.51425	5e-05	0.0010838	yes
TCONS_00167045	PC1	WC1	0.691871	0.0952558	-2.86062	-1.47621	0.00105	0.01612	yes
TCONS_00021183	PC1	WC1	0.97301	0.138103	-2.81671	-2.18886	5e-05	0.0010838	yes
TCONS_00170317	PC1	WC1	13.1447	1.90769	-2.78458	-2.25146	0.0036	0.0448229	yes
TCONS_00090662	PC1	WC1	1.82349	0.273128	-2.73905	-1.68589	0.00245	0.0327643	yes
TCONS_00166634	PC1	WC1	10.4801	1.75568	-2.57755	-2.47515	5e-05	0.0010838	yes
TCONS_00132931	PC1	WC1	4.13917	0.714433	-2.53447	-1.57047	0.00355	0.0443126	yes
TCONS_00035830	PC1	WC1	4.78881	0.892594	-2.42359	-1.86779	5e-05	0.0010838	yes
TCONS_00014948	PC1	WC1	12.3992	2.37058	-2.38693	-1.58813	0.00095	0.0148168	yes
TCONS_00183689	PC1	WC1	6.1092	1.19305	-2.35634	-1.62332	0.00015	0.00295356	yes
TCONS_00165686	PC1	WC1	1.47298	0.299037	-2.30034	-1.59604	0.00035	0.00624916	yes
TCONS_00151925	PC1	WC1	3.30098	0.691588	-2.25491	-1.86165	0.0003	0.00546436	yes
TCONS_00052427	PC1	WC1	5755.54	1279.3	-2.1696	-3.05404	5e-05	0.0010838	yes
TCONS_00101074	PC1	WC1	1.94409	0.433597	-2.16467	-1.6521	0.00025	0.00465413	yes
TCONS_00093648	PC1	WC1	3.72631	0.974974	-1.93431	-1.97929	5e-05	0.0010838	yes
TCONS_00101944	PC1	WC1	1.76024	0.474089	-1.89255	-1.34728	0.0015	0.0217644	yes
TCONS_00062359	PC1	WC1	23.5056	6.71884	-1.80672	-1.45141	0.0025	0.0333277	yes
TCONS_00102657	PC1	WC1	68.2332	21.3221	-1.67812	-1.88576	0.0001	0.00204929	yes
TCONS_00105448	PC1	WC1	31.6337	11.487	-1.46146	-1.37646	0.0019	0.0265243	yes
TCONS_00138045	PC1	WC1	8.90318	3.45635	-1.36507	-1.39914	0.0006	0.00998639	yes
TCONS_00047612	PC1	WC1	20.2969	8.62277	-1.23504	-1.64561	0.0002	0.00382244	yes
TCONS_00099748	PC1	WC1	29.5422	12.7904	-1.20771	-1.57374	0.00015	0.00295356	yes
TCONS_00169772	PC1	WC1	35.2646	15.3588	-1.19916	-1.25029	0.0023	0.031102	yes
TCONS_00165688	PC1	WC1	13.6846	6.48718	-1.07689	-1.35375	0.0012	0.0180478	yes
TCONS_00007720	PC1	WC1	73.1044	35.8732	-1.02705	-1.40451	0.00155	0.0223609	yes
TCONS_00179242	PC1	WC1	45.0269	22.4877	-1.00165	-1.39212	0.00055	0.00926455	yes
TCONS_00038470	PC1	WC1	16.97	35.6254	1.06992	1.50153	0.00035	0.00624916	yes
TCONS_00161584	PC1	WC1	4.37047	10.1051	1.20923	1.29814	0.00235	0.0316758	yes
TCONS_00026913	PC1	WC1	70.1778	167.139	1.25196	1.9686	5e-05	0.0010838	yes
TCONS_00127767	PC1	WC1	6.78878	16.7568	1.30352	1.53502	0.00035	0.00624916	yes
TCONS_00116898	PC1	WC1	3.20309	8.48647	1.4057	1.36903	0.00245	0.0327643	yes
TCONS_00157651	PC1	WC1	20.3334	57.443	1.49828	1.36925	0.0007	0.0114022	yes
TCONS_00025337	PC1	WC1	10.2873	29.4545	1.51762	1.54939	0.00045	0.00778222	yes
TCONS_00052970	PC1	WC1	8.43515	24.3832	1.5314	1.81292	5e-05	0.0010838	yes
TCONS_00068219	PC1	WC1	37.0891	108.15	1.54397	1.63249	5e-05	0.0010838	yes
TCONS_00052926	PC1	WC1	6.02239	18.6249	1.62882	1.69905	0.00025	0.00465413	yes
TCONS_00006963	PC1	WC1	2.88729	9.05381	1.64881	1.50835	0.0003	0.00546436	yes
TCONS_00058713	PC1	WC1	0.691948	2.17796	1.65424	1.64949	0.00045	0.00778222	yes
TCONS_00038360	PC1	WC1	9.33438	29.5612	1.66308	2.12118	5e-05	0.0010838	yes
TCONS_00100489	PC1	WC1	3.80861	12.1379	1.67218	1.81491	0.0001	0.00204929	yes
TCONS_00140186	PC1	WC1	14.8741	48.6637	1.71004	1.99459	5e-05	0.0010838	yes
TCONS_00068606	PC1	WC1	1.94285	6.47667	1.73708	1.66381	0.00115	0.0174045	yes
TCONS_00118135	PC1	WC1	6.44127	21.5946	1.74525	2.18449	5e-05	0.0010838	yes
TCONS_00053393	PC1	WC1	8.7565	29.9674	1.77497	1.41938	0.00395	0.0482792	yes
TCONS_00200104	PC1	WC1	0.53867	1.90262	1.82052	1.25087	0.0034	0.0428066	yes
TCONS_00068611	PC1	WC1	0.888802	3.15906	1.82956	1.46559	0.0018	0.0253677	yes
TCONS_00154980	PC1	WC1	0.274743	1.01452	1.88464	1.52406	0.0018	0.0253677	yes
TCONS_00152386	PC1	WC1	2.50214	9.53627	1.93026	1.87324	5e-05	0.0010838	yes
TCONS_00128749	PC1	WC1	1.21631	4.73116	1.95969	1.27921	0.0024	0.032224	yes
TCONS_00192308	PC1	WC1	1.64179	6.41184	1.96547	1.89244	0.0001	0.00204929	yes
TCONS_00137839	PC1	WC1	1.48855	5.815	1.96587	1.45053	0.0019	0.0265243	yes
TCONS_00103555	PC1	WC1	0.481173	1.98479	2.04436	1.5252	0.00065	0.0106968	yes
TCONS_00197848	PC1	WC1	0.732297	3.03817	2.0527	1.44932	0.0004	0.00701967	yes
TCONS_00134600	PC1	WC1	6.00462	25.2456	2.07189	2.06308	5e-05	0.0010838	yes
TCONS_00078688	PC1	WC1	1.29937	5.6252	2.11409	1.88818	5e-05	0.0010838	yes
TCONS_00058985	PC1	WC1	0.538682	2.35417	2.12771	1.57291	0.00355	0.0443126	yes
TCONS_00081792	PC1	WC1	1.38216	6.51166	2.2361	1.89369	5e-05	0.0010838	yes
TCONS_00166113	PC1	WC1	17.7351	88.5622	2.32009	2.18273	5e-05	0.0010838	yes
TCONS_00014902	PC1	WC1	0.58543	3.14183	2.42404	2.12788	5e-05	0.0010838	yes
TCONS_00179964	PC1	WC1	0.1706	0.986862	2.53223	2.15055	5e-05	0.0010838	yes
TCONS_00028439	PC1	WC1	4.09947	25.8115	2.65451	2.47376	5e-05	0.0010838	yes
TCONS_00118086	PC1	WC1	5.68769	41.9061	2.88125	2.87908	5e-05	0.0010838	yes
TCONS_00184100	PC1	WC1	1.82336	14.6782	3.009	2.54282	5e-05	0.0010838	yes
TCONS_00156848	PC1	WC1	0.624928	5.71656	3.19339	2.17094	0.0006	0.00998639	yes
TCONS_00103666	PC1	WC1	0.107336	1.00151	3.22197	2.07216	0.00035	0.00624916	yes
TCONS_00147375	PC1	WC1	0.206243	2.94239	3.83457	3.09003	5e-05	0.0010838	yes
TCONS_00156308	PC1	WC1	1.89432	27.2568	3.84686	3.18169	5e-05	0.0010838	yes
TCONS_00062469	PC1	WC1	0.214691	3.42049	3.99387	2.01706	0.0024	0.032224	yes
TCONS_00182496	PC1	WC1	0.0882033	1.43036	4.0194	2.2974	0.00045	0.00778222	yes
TCONS_00053668	PC1	WC1	3.64996	72.2993	4.30803	4.73361	0.0007	0.0114022	yes
TCONS_00149652	PC1	WC1	1.17831	24.6553	4.3871	3.74379	5e-05	0.0010838	yes
TCONS_00004274	PC1	WC1	0	1.58712	inf	#NAME?	5e-05	0.0010838	yes
TCONS_00010724	PC1	WC1	0	3.41331	inf	#NAME?	5e-05	0.0010838	yes
TCONS_00013186	PC1	WC1	0	2.55562	inf	#NAME?	5e-05	0.0010838	yes
TCONS_00014568	PC1	WC1	0	1.4127	inf	#NAME?	5e-05	0.0010838	yes
TCONS_00014571	PC1	WC1	0	0.830582	inf	#NAME?	5e-05	0.0010838	yes
TCONS_00016861	PC1	WC1	0	1.38672	inf	#NAME?	5e-05	0.0010838	yes
TCONS_00016862	PC1	WC1	0	0.730299	inf	#NAME?	5e-05	0.0010838	yes
TCONS_00018635	PC1	WC1	0	1.22724	inf	#NAME?	5e-05	0.0010838	yes
TCONS_00020019	PC1	WC1	0	0.974617	inf	#NAME?	5e-05	0.0010838	yes
TCONS_00021776	PC1	WC1	0	1.0234	inf	#NAME?	5e-05	0.0010838	yes
TCONS_00028184	PC1	WC1	0	0.824586	inf	#NAME?	5e-05	0.0010838	yes
TCONS_00031171	PC1	WC1	0	0.856201	inf	#NAME?	5e-05	0.0010838	yes
TCONS_00032166	PC1	WC1	0	7.11241	inf	#NAME?	5e-05	0.0010838	yes
TCONS_00032325	PC1	WC1	0	1.29191	inf	#NAME?	5e-05	0.0010838	yes
TCONS_00032326	PC1	WC1	0	5.57124	inf	#NAME?	5e-05	0.0010838	yes
TCONS_00037329	PC1	WC1	0	1.29092	inf	#NAME?	5e-05	0.0010838	yes
TCONS_00038469	PC1	WC1	0	18.6428	inf	#NAME?	5e-05	0.0010838	yes
TCONS_00038873	PC1	WC1	0	11.6258	inf	#NAME?	5e-05	0.0010838	yes
TCONS_00040312	PC1	WC1	0	1.11383	inf	#NAME?	5e-05	0.0010838	yes
TCONS_00041448	PC1	WC1	0	1.1303	inf	#NAME?	5e-05	0.0010838	yes
TCONS_00042411	PC1	WC1	0	1.20108	inf	#NAME?	5e-05	0.0010838	yes
TCONS_00043492	PC1	WC1	0	0.719438	inf	#NAME?	5e-05	0.0010838	yes
TCONS_00044489	PC1	WC1	0	5.23965	inf	#NAME?	5e-05	0.0010838	yes
TCONS_00044944	PC1	WC1	0	1.94829	inf	#NAME?	5e-05	0.0010838	yes
TCONS_00045675	PC1	WC1	0	4.21194	inf	#NAME?	5e-05	0.0010838	yes
TCONS_00049322	PC1	WC1	0	1.61001	inf	#NAME?	5e-05	0.0010838	yes
TCONS_00051651	PC1	WC1	0	3.63444	inf	#NAME?	5e-05	0.0010838	yes
TCONS_00052043	PC1	WC1	0	19.4293	inf	#NAME?	5e-05	0.0010838	yes
TCONS_00052458	PC1	WC1	0	10.0049	inf	#NAME?	5e-05	0.0010838	yes
TCONS_00054409	PC1	WC1	0	0.794563	inf	#NAME?	5e-05	0.0010838	yes
TCONS_00054737	PC1	WC1	0	1.51883	inf	#NAME?	5e-05	0.0010838	yes
TCONS_00054757	PC1	WC1	0	20.2186	inf	#NAME?	5e-05	0.0010838	yes
TCONS_00055518	PC1	WC1	0	1.30049	inf	#NAME?	5e-05	0.0010838	yes
TCONS_00056657	PC1	WC1	0	1.28806	inf	#NAME?	5e-05	0.0010838	yes
TCONS_00056727	PC1	WC1	0	1.93445	inf	#NAME?	5e-05	0.0010838	yes
TCONS_00058134	PC1	WC1	0	4.11094	inf	#NAME?	5e-05	0.0010838	yes
TCONS_00058712	PC1	WC1	0	5.87576	inf	#NAME?	5e-05	0.0010838	yes
TCONS_00060164	PC1	WC1	0	2.70415	inf	#NAME?	5e-05	0.0010838	yes
TCONS_00060166	PC1	WC1	0	5.61846	inf	#NAME?	5e-05	0.0010838	yes
TCONS_00061165	PC1	WC1	0	0.941201	inf	#NAME?	5e-05	0.0010838	yes
TCONS_00063689	PC1	WC1	0	2.83075	inf	#NAME?	5e-05	0.0010838	yes
TCONS_00067758	PC1	WC1	0	8.51961	inf	#NAME?	5e-05	0.0010838	yes
TCONS_00068022	PC1	WC1	0	18.4553	inf	#NAME?	5e-05	0.0010838	yes
TCONS_00068209	PC1	WC1	0	6.68224	inf	#NAME?	5e-05	0.0010838	yes
TCONS_00069772	PC1	WC1	0	27.6861	inf	#NAME?	5e-05	0.0010838	yes
TCONS_00069868	PC1	WC1	0	3.51727	inf	#NAME?	5e-05	0.0010838	yes
TCONS_00071088	PC1	WC1	0	4.72281	inf	#NAME?	5e-05	0.0010838	yes
TCONS_00072180	PC1	WC1	0	1.49179	inf	#NAME?	5e-05	0.0010838	yes
TCONS_00072294	PC1	WC1	0	1.04666	inf	#NAME?	5e-05	0.0010838	yes
TCONS_00072295	PC1	WC1	0	0.816091	inf	#NAME?	5e-05	0.0010838	yes
TCONS_00077406	PC1	WC1	0	8.94417	inf	#NAME?	5e-05	0.0010838	yes
TCONS_00077925	PC1	WC1	0	8.05163	inf	#NAME?	5e-05	0.0010838	yes
TCONS_00078162	PC1	WC1	0	3.60978	inf	#NAME?	5e-05	0.0010838	yes
TCONS_00078194	PC1	WC1	0	14.5383	inf	#NAME?	5e-05	0.0010838	yes
TCONS_00078195	PC1	WC1	0	1.82013	inf	#NAME?	5e-05	0.0010838	yes
TCONS_00078196	PC1	WC1	0	1.27612	inf	#NAME?	5e-05	0.0010838	yes
TCONS_00080042	PC1	WC1	0	8.85776	inf	#NAME?	5e-05	0.0010838	yes
TCONS_00080830	PC1	WC1	0	10.5128	inf	#NAME?	5e-05	0.0010838	yes
TCONS_00081701	PC1	WC1	0	4.96889	inf	#NAME?	5e-05	0.0010838	yes
TCONS_00085179	PC1	WC1	0	1.05523	inf	#NAME?	5e-05	0.0010838	yes
TCONS_00085577	PC1	WC1	0	1.02606	inf	#NAME?	5e-05	0.0010838	yes
TCONS_00090664	PC1	WC1	0	1.80371	inf	#NAME?	5e-05	0.0010838	yes
TCONS_00092826	PC1	WC1	0	2.63004	inf	#NAME?	5e-05	0.0010838	yes
TCONS_00092827	PC1	WC1	0	1.3227	inf	#NAME?	5e-05	0.0010838	yes
TCONS_00092828	PC1	WC1	0	1.02174	inf	#NAME?	5e-05	0.0010838	yes
TCONS_00092965	PC1	WC1	0	2.35087	inf	#NAME?	5e-05	0.0010838	yes
TCONS_00093513	PC1	WC1	0	7.68791	inf	#NAME?	5e-05	0.0010838	yes
TCONS_00093861	PC1	WC1	0	8.68425	inf	#NAME?	5e-05	0.0010838	yes
TCONS_00093938	PC1	WC1	0	7.90941	inf	#NAME?	5e-05	0.0010838	yes
TCONS_00094541	PC1	WC1	0	1.15205	inf	#NAME?	5e-05	0.0010838	yes
TCONS_00095164	PC1	WC1	0	0.876136	inf	#NAME?	5e-05	0.0010838	yes
TCONS_00096361	PC1	WC1	0	2.91936	inf	#NAME?	5e-05	0.0010838	yes
TCONS_00096777	PC1	WC1	0	1.29592	inf	#NAME?	5e-05	0.0010838	yes
TCONS_00098067	PC1	WC1	0	0.845591	inf	#NAME?	5e-05	0.0010838	yes
TCONS_00098627	PC1	WC1	0	2.00728	inf	#NAME?	5e-05	0.0010838	yes
TCONS_00101099	PC1	WC1	0	2.1365	inf	#NAME?	5e-05	0.0010838	yes
TCONS_00102563	PC1	WC1	0	1.19044	inf	#NAME?	5e-05	0.0010838	yes
TCONS_00102698	PC1	WC1	0	1.73212	inf	#NAME?	5e-05	0.0010838	yes
TCONS_00108110	PC1	WC1	0	2.47661	inf	#NAME?	5e-05	0.0010838	yes
TCONS_00108307	PC1	WC1	0	3.87646	inf	#NAME?	5e-05	0.0010838	yes
TCONS_00109193	PC1	WC1	0	1.35927	inf	#NAME?	5e-05	0.0010838	yes
TCONS_00110818	PC1	WC1	0	1.90475	inf	#NAME?	5e-05	0.0010838	yes
TCONS_00112527	PC1	WC1	0	16.5749	inf	#NAME?	5e-05	0.0010838	yes
TCONS_00113460	PC1	WC1	0	1.29721	inf	#NAME?	5e-05	0.0010838	yes
TCONS_00116069	PC1	WC1	0	15.4511	inf	#NAME?	5e-05	0.0010838	yes
TCONS_00118085	PC1	WC1	0	5.67553	inf	#NAME?	5e-05	0.0010838	yes
TCONS_00119860	PC1	WC1	0	3.93453	inf	#NAME?	5e-05	0.0010838	yes
TCONS_00121937	PC1	WC1	0	1.49378	inf	#NAME?	5e-05	0.0010838	yes
TCONS_00122288	PC1	WC1	0	2.33126	inf	#NAME?	5e-05	0.0010838	yes
TCONS_00122522	PC1	WC1	0	28.4555	inf	#NAME?	5e-05	0.0010838	yes
TCONS_00122646	PC1	WC1	0	5.25856	inf	#NAME?	5e-05	0.0010838	yes
TCONS_00124373	PC1	WC1	0	2.42307	inf	#NAME?	5e-05	0.0010838	yes
TCONS_00126917	PC1	WC1	0	1.09774	inf	#NAME?	5e-05	0.0010838	yes
TCONS_00127577	PC1	WC1	0	1.25872	inf	#NAME?	5e-05	0.0010838	yes
TCONS_00128169	PC1	WC1	0	4.63213	inf	#NAME?	5e-05	0.0010838	yes
TCONS_00128350	PC1	WC1	0	0.617794	inf	#NAME?	5e-05	0.0010838	yes
TCONS_00130474	PC1	WC1	0	1.90086	inf	#NAME?	5e-05	0.0010838	yes
TCONS_00132522	PC1	WC1	0	0.905756	inf	#NAME?	5e-05	0.0010838	yes
TCONS_00136846	PC1	WC1	0	16.476	inf	#NAME?	5e-05	0.0010838	yes
TCONS_00143532	PC1	WC1	0	0.882874	inf	#NAME?	5e-05	0.0010838	yes
TCONS_00145804	PC1	WC1	0	0.925313	inf	#NAME?	5e-05	0.0010838	yes
TCONS_00146097	PC1	WC1	0	0.774159	inf	#NAME?	5e-05	0.0010838	yes
TCONS_00146225	PC1	WC1	0	1.80156	inf	#NAME?	5e-05	0.0010838	yes
TCONS_00146226	PC1	WC1	0	10.235	inf	#NAME?	5e-05	0.0010838	yes
TCONS_00148886	PC1	WC1	0	3.9952	inf	#NAME?	5e-05	0.0010838	yes
TCONS_00149492	PC1	WC1	0	1.37072	inf	#NAME?	5e-05	0.0010838	yes
TCONS_00152731	PC1	WC1	0	2.90922	inf	#NAME?	5e-05	0.0010838	yes
TCONS_00152941	PC1	WC1	0	1.36042	inf	#NAME?	5e-05	0.0010838	yes
TCONS_00154461	PC1	WC1	0	3.14308	inf	#NAME?	5e-05	0.0010838	yes
TCONS_00160214	PC1	WC1	0	1.74559	inf	#NAME?	5e-05	0.0010838	yes
TCONS_00160658	PC1	WC1	0	1.3907	inf	#NAME?	5e-05	0.0010838	yes
TCONS_00160774	PC1	WC1	0	2.76428	inf	#NAME?	5e-05	0.0010838	yes
TCONS_00163929	PC1	WC1	0	11.1736	inf	#NAME?	5e-05	0.0010838	yes
TCONS_00164104	PC1	WC1	0	1.41506	inf	#NAME?	5e-05	0.0010838	yes
TCONS_00164431	PC1	WC1	0	1.97315	inf	#NAME?	5e-05	0.0010838	yes
TCONS_00164654	PC1	WC1	0	9.83558	inf	#NAME?	5e-05	0.0010838	yes
TCONS_00167757	PC1	WC1	0	20.8904	inf	#NAME?	5e-05	0.0010838	yes
TCONS_00168039	PC1	WC1	0	1.95494	inf	#NAME?	5e-05	0.0010838	yes
TCONS_00170100	PC1	WC1	0	4.87432	inf	#NAME?	5e-05	0.0010838	yes
TCONS_00175605	PC1	WC1	0	0.831987	inf	#NAME?	5e-05	0.0010838	yes
TCONS_00175735	PC1	WC1	0	2.25032	inf	#NAME?	5e-05	0.0010838	yes
TCONS_00177396	PC1	WC1	0	51.0983	inf	#NAME?	5e-05	0.0010838	yes
TCONS_00178826	PC1	WC1	0	7.65329	inf	#NAME?	5e-05	0.0010838	yes
TCONS_00179974	PC1	WC1	0	1.17897	inf	#NAME?	5e-05	0.0010838	yes
TCONS_00180141	PC1	WC1	0	17.4343	inf	#NAME?	5e-05	0.0010838	yes
TCONS_00180290	PC1	WC1	0	3.39358	inf	#NAME?	5e-05	0.0010838	yes
TCONS_00183072	PC1	WC1	0	1.7116	inf	#NAME?	5e-05	0.0010838	yes
TCONS_00187362	PC1	WC1	0	0.617747	inf	#NAME?	5e-05	0.0010838	yes
TCONS_00194241	PC1	WC1	0	1.83286	inf	#NAME?	5e-05	0.0010838	yes
TCONS_00196991	PC1	WC1	0	26.0521	inf	#NAME?	5e-05	0.0010838	yes
TCONS_00197680	PC1	WC1	0	11.3622	inf	#NAME?	5e-05	0.0010838	yes
TCONS_00199045	PC1	WC1	0	2.09881	inf	#NAME?	5e-05	0.0010838	yes
TCONS_00200128	PC1	WC1	0	3.78215	inf	#NAME?	5e-05	0.0010838	yes
TCONS_00200174	PC1	WC1	0	1.52723	inf	#NAME?	5e-05	0.0010838	yes
TCONS_00200546	PC1	WC1	0	0.697062	inf	#NAME?	5e-05	0.0010838	yes
TCONS_00200547	PC1	WC1	0	0.88503	inf	#NAME?	5e-05	0.0010838	yes
TCONS_00200548	PC1	WC1	0	0.895678	inf	#NAME?	5e-05	0.0010838	yes
TCONS_00201138	PC1	WC1	0	2.97015	inf	#NAME?	5e-05	0.0010838	yes
TCONS_00118997	PC1	WC1	0	1.15358	inf	#NAME?	0.0001	0.00204929	yes
TCONS_00126947	PC1	WC1	0	1.06974	inf	#NAME?	0.0001	0.00204929	yes
TCONS_00176805	PC1	WC1	0	1.72689	inf	#NAME?	0.0001	0.00204929	yes
TCONS_00179640	PC1	WC1	0	2.71812	inf	#NAME?	0.0001	0.00204929	yes
TCONS_00043378	PC1	WC1	0	1.36509	inf	#NAME?	0.0002	0.00382244	yes
TCONS_00043819	PC1	WC1	0	1.36931	inf	#NAME?	0.00025	0.00465413	yes
TCONS_00060165	PC1	WC1	0	2.04126	inf	#NAME?	0.00025	0.00465413	yes
TCONS_00180282	PC1	WC1	0	0.837622	inf	#NAME?	0.0013	0.0192926	yes
TCONS_00093858	PC1	WC1	0	1.98596	inf	#NAME?	0.00245	0.0327643	yes
TCONS_00153578	PC1	WC1	0	3.53614	inf	#NAME?	0.00305	0.0392091	yes
TCONS_00128162	PC1	WC1	0	1.64349	inf	#NAME?	0.00315	0.040227	yes
TCONS_00000661	PC1	WC1	10.7102	0	#NAME?	#NAME?	5e-05	0.0010838	yes
TCONS_00000662	PC1	WC1	15.9066	0	#NAME?	#NAME?	5e-05	0.0010838	yes
TCONS_00000798	PC1	WC1	1.00809	0	#NAME?	#NAME?	5e-05	0.0010838	yes
TCONS_00000799	PC1	WC1	4.8044	0	#NAME?	#NAME?	5e-05	0.0010838	yes
TCONS_00001342	PC1	WC1	10.8305	0	#NAME?	#NAME?	5e-05	0.0010838	yes
TCONS_00001350	PC1	WC1	51.8764	0	#NAME?	#NAME?	5e-05	0.0010838	yes
TCONS_00001603	PC1	WC1	28.3181	0	#NAME?	#NAME?	5e-05	0.0010838	yes
TCONS_00001994	PC1	WC1	0.933212	0	#NAME?	#NAME?	5e-05	0.0010838	yes
TCONS_00002004	PC1	WC1	1.27303	0	#NAME?	#NAME?	5e-05	0.0010838	yes
TCONS_00002677	PC1	WC1	1.32438	0	#NAME?	#NAME?	5e-05	0.0010838	yes
TCONS_00003884	PC1	WC1	3.50161	0	#NAME?	#NAME?	5e-05	0.0010838	yes
TCONS_00004059	PC1	WC1	4.27647	0	#NAME?	#NAME?	5e-05	0.0010838	yes
TCONS_00004276	PC1	WC1	2.84895	0	#NAME?	#NAME?	5e-05	0.0010838	yes
TCONS_00004965	PC1	WC1	21.7808	0	#NAME?	#NAME?	5e-05	0.0010838	yes
TCONS_00005376	PC1	WC1	1.66772	0	#NAME?	#NAME?	5e-05	0.0010838	yes
TCONS_00005415	PC1	WC1	0.779213	0	#NAME?	#NAME?	5e-05	0.0010838	yes
TCONS_00008798	PC1	WC1	0.884393	0	#NAME?	#NAME?	5e-05	0.0010838	yes
TCONS_00009310	PC1	WC1	0.758556	0	#NAME?	#NAME?	5e-05	0.0010838	yes
TCONS_00009700	PC1	WC1	0.950402	0	#NAME?	#NAME?	5e-05	0.0010838	yes
TCONS_00009718	PC1	WC1	4.81142	0	#NAME?	#NAME?	5e-05	0.0010838	yes
TCONS_00009967	PC1	WC1	0.756806	0	#NAME?	#NAME?	5e-05	0.0010838	yes
TCONS_00011419	PC1	WC1	0.928671	0	#NAME?	#NAME?	5e-05	0.0010838	yes
TCONS_00013627	PC1	WC1	11.4047	0	#NAME?	#NAME?	5e-05	0.0010838	yes
TCONS_00014899	PC1	WC1	0.965969	0	#NAME?	#NAME?	5e-05	0.0010838	yes
TCONS_00015349	PC1	WC1	2.46314	0	#NAME?	#NAME?	5e-05	0.0010838	yes
TCONS_00016415	PC1	WC1	17.1352	0	#NAME?	#NAME?	5e-05	0.0010838	yes
TCONS_00017950	PC1	WC1	21.7771	0	#NAME?	#NAME?	5e-05	0.0010838	yes
TCONS_00019084	PC1	WC1	1.06356	0	#NAME?	#NAME?	5e-05	0.0010838	yes
TCONS_00019095	PC1	WC1	1.36408	0	#NAME?	#NAME?	5e-05	0.0010838	yes
TCONS_00019608	PC1	WC1	5.20901	0	#NAME?	#NAME?	5e-05	0.0010838	yes
TCONS_00019691	PC1	WC1	50.5932	0	#NAME?	#NAME?	5e-05	0.0010838	yes
TCONS_00019704	PC1	WC1	2.74365	0	#NAME?	#NAME?	5e-05	0.0010838	yes
TCONS_00020020	PC1	WC1	1.75928	0	#NAME?	#NAME?	5e-05	0.0010838	yes
TCONS_00020800	PC1	WC1	1.91045	0	#NAME?	#NAME?	5e-05	0.0010838	yes
TCONS_00021185	PC1	WC1	1.45616	0	#NAME?	#NAME?	5e-05	0.0010838	yes
TCONS_00022010	PC1	WC1	1.47115	0	#NAME?	#NAME?	5e-05	0.0010838	yes
TCONS_00022220	PC1	WC1	6.625	0	#NAME?	#NAME?	5e-05	0.0010838	yes
TCONS_00022484	PC1	WC1	9.10005	0	#NAME?	#NAME?	5e-05	0.0010838	yes
TCONS_00022520	PC1	WC1	49.4009	0	#NAME?	#NAME?	5e-05	0.0010838	yes
TCONS_00024250	PC1	WC1	4.58735	0	#NAME?	#NAME?	5e-05	0.0010838	yes
TCONS_00025017	PC1	WC1	3.82707	0	#NAME?	#NAME?	5e-05	0.0010838	yes
TCONS_00025018	PC1	WC1	5.63329	0	#NAME?	#NAME?	5e-05	0.0010838	yes
TCONS_00025344	PC1	WC1	3.37866	0	#NAME?	#NAME?	5e-05	0.0010838	yes
TCONS_00027839	PC1	WC1	1.85989	0	#NAME?	#NAME?	5e-05	0.0010838	yes
TCONS_00028379	PC1	WC1	1.76164	0	#NAME?	#NAME?	5e-05	0.0010838	yes
TCONS_00029890	PC1	WC1	4.95181	0	#NAME?	#NAME?	5e-05	0.0010838	yes
TCONS_00030088	PC1	WC1	19.8092	0	#NAME?	#NAME?	5e-05	0.0010838	yes
TCONS_00030089	PC1	WC1	4.63913	0	#NAME?	#NAME?	5e-05	0.0010838	yes
TCONS_00031177	PC1	WC1	2.9772	0	#NAME?	#NAME?	5e-05	0.0010838	yes
TCONS_00032255	PC1	WC1	18.4474	0	#NAME?	#NAME?	5e-05	0.0010838	yes
TCONS_00032528	PC1	WC1	2.11166	0	#NAME?	#NAME?	5e-05	0.0010838	yes
TCONS_00032535	PC1	WC1	1.74217	0	#NAME?	#NAME?	5e-05	0.0010838	yes
TCONS_00032727	PC1	WC1	2.73119	0	#NAME?	#NAME?	5e-05	0.0010838	yes
TCONS_00033351	PC1	WC1	1.34159	0	#NAME?	#NAME?	5e-05	0.0010838	yes
TCONS_00033826	PC1	WC1	2.44051	0	#NAME?	#NAME?	5e-05	0.0010838	yes
TCONS_00034520	PC1	WC1	3.22996	0	#NAME?	#NAME?	5e-05	0.0010838	yes
TCONS_00035511	PC1	WC1	18.0149	0	#NAME?	#NAME?	5e-05	0.0010838	yes
TCONS_00037461	PC1	WC1	0.885089	0	#NAME?	#NAME?	5e-05	0.0010838	yes
TCONS_00039861	PC1	WC1	0.875881	0	#NAME?	#NAME?	5e-05	0.0010838	yes
TCONS_00040310	PC1	WC1	4.59701	0	#NAME?	#NAME?	5e-05	0.0010838	yes
TCONS_00040875	PC1	WC1	4.15175	0	#NAME?	#NAME?	5e-05	0.0010838	yes
TCONS_00041460	PC1	WC1	0.949678	0	#NAME?	#NAME?	5e-05	0.0010838	yes
TCONS_00043626	PC1	WC1	28.1516	0	#NAME?	#NAME?	5e-05	0.0010838	yes
TCONS_00043627	PC1	WC1	2.21973	0	#NAME?	#NAME?	5e-05	0.0010838	yes
TCONS_00043799	PC1	WC1	1.73966	0	#NAME?	#NAME?	5e-05	0.0010838	yes
TCONS_00043800	PC1	WC1	3.45504	0	#NAME?	#NAME?	5e-05	0.0010838	yes
TCONS_00045980	PC1	WC1	1.86872	0	#NAME?	#NAME?	5e-05	0.0010838	yes
TCONS_00045981	PC1	WC1	0.790875	0	#NAME?	#NAME?	5e-05	0.0010838	yes
TCONS_00046411	PC1	WC1	2.74757	0	#NAME?	#NAME?	5e-05	0.0010838	yes
TCONS_00047750	PC1	WC1	2.22464	0	#NAME?	#NAME?	5e-05	0.0010838	yes
TCONS_00048399	PC1	WC1	7.89061	0	#NAME?	#NAME?	5e-05	0.0010838	yes
TCONS_00049432	PC1	WC1	13.2243	0	#NAME?	#NAME?	5e-05	0.0010838	yes
TCONS_00049829	PC1	WC1	3.59185	0	#NAME?	#NAME?	5e-05	0.0010838	yes
TCONS_00049910	PC1	WC1	31.6805	0	#NAME?	#NAME?	5e-05	0.0010838	yes
TCONS_00050095	PC1	WC1	0.872838	0	#NAME?	#NAME?	5e-05	0.0010838	yes
TCONS_00050097	PC1	WC1	1.27321	0	#NAME?	#NAME?	5e-05	0.0010838	yes
TCONS_00050430	PC1	WC1	7.34676	0	#NAME?	#NAME?	5e-05	0.0010838	yes
TCONS_00052471	PC1	WC1	1.71137	0	#NAME?	#NAME?	5e-05	0.0010838	yes
TCONS_00052969	PC1	WC1	1.50987	0	#NAME?	#NAME?	5e-05	0.0010838	yes
TCONS_00053288	PC1	WC1	2.58477	0	#NAME?	#NAME?	5e-05	0.0010838	yes
TCONS_00054756	PC1	WC1	1.55915	0	#NAME?	#NAME?	5e-05	0.0010838	yes
TCONS_00055226	PC1	WC1	2.77839	0	#NAME?	#NAME?	5e-05	0.0010838	yes
TCONS_00056021	PC1	WC1	1.00849	0	#NAME?	#NAME?	5e-05	0.0010838	yes
TCONS_00056025	PC1	WC1	4.15926	0	#NAME?	#NAME?	5e-05	0.0010838	yes
TCONS_00056466	PC1	WC1	1.20163	0	#NAME?	#NAME?	5e-05	0.0010838	yes
TCONS_00057655	PC1	WC1	7.33374	0	#NAME?	#NAME?	5e-05	0.0010838	yes
TCONS_00058707	PC1	WC1	0.841433	0	#NAME?	#NAME?	5e-05	0.0010838	yes
TCONS_00058708	PC1	WC1	5.76722	0	#NAME?	#NAME?	5e-05	0.0010838	yes
TCONS_00059449	PC1	WC1	10.7228	0	#NAME?	#NAME?	5e-05	0.0010838	yes
TCONS_00060010	PC1	WC1	1.54674	0	#NAME?	#NAME?	5e-05	0.0010838	yes
TCONS_00060541	PC1	WC1	4.85862	0	#NAME?	#NAME?	5e-05	0.0010838	yes
TCONS_00060874	PC1	WC1	1.01723	0	#NAME?	#NAME?	5e-05	0.0010838	yes
TCONS_00061047	PC1	WC1	0.842161	0	#NAME?	#NAME?	5e-05	0.0010838	yes
TCONS_00062781	PC1	WC1	1.31018	0	#NAME?	#NAME?	5e-05	0.0010838	yes
TCONS_00063682	PC1	WC1	1.10005	0	#NAME?	#NAME?	5e-05	0.0010838	yes
TCONS_00064259	PC1	WC1	0.645655	0	#NAME?	#NAME?	5e-05	0.0010838	yes
TCONS_00064263	PC1	WC1	10.8525	0	#NAME?	#NAME?	5e-05	0.0010838	yes
TCONS_00065428	PC1	WC1	0.771491	0	#NAME?	#NAME?	5e-05	0.0010838	yes
TCONS_00066572	PC1	WC1	15.9544	0	#NAME?	#NAME?	5e-05	0.0010838	yes
TCONS_00067452	PC1	WC1	0.888191	0	#NAME?	#NAME?	5e-05	0.0010838	yes
TCONS_00067885	PC1	WC1	4.11883	0	#NAME?	#NAME?	5e-05	0.0010838	yes
TCONS_00071091	PC1	WC1	0.980391	0	#NAME?	#NAME?	5e-05	0.0010838	yes
TCONS_00071944	PC1	WC1	18.2652	0	#NAME?	#NAME?	5e-05	0.0010838	yes
TCONS_00073076	PC1	WC1	2.5372	0	#NAME?	#NAME?	5e-05	0.0010838	yes
TCONS_00073482	PC1	WC1	0.899464	0	#NAME?	#NAME?	5e-05	0.0010838	yes
TCONS_00073483	PC1	WC1	1.63706	0	#NAME?	#NAME?	5e-05	0.0010838	yes
TCONS_00076211	PC1	WC1	1.58632	0	#NAME?	#NAME?	5e-05	0.0010838	yes
TCONS_00076647	PC1	WC1	0.855923	0	#NAME?	#NAME?	5e-05	0.0010838	yes
TCONS_00077350	PC1	WC1	1.97749	0	#NAME?	#NAME?	5e-05	0.0010838	yes
TCONS_00078805	PC1	WC1	7.86739	0	#NAME?	#NAME?	5e-05	0.0010838	yes
TCONS_00078861	PC1	WC1	1.95693	0	#NAME?	#NAME?	5e-05	0.0010838	yes
TCONS_00079890	PC1	WC1	2.41664	0	#NAME?	#NAME?	5e-05	0.0010838	yes
TCONS_00080691	PC1	WC1	3.64963	0	#NAME?	#NAME?	5e-05	0.0010838	yes
TCONS_00080823	PC1	WC1	1.02467	0	#NAME?	#NAME?	5e-05	0.0010838	yes
TCONS_00080899	PC1	WC1	1.54458	0	#NAME?	#NAME?	5e-05	0.0010838	yes
TCONS_00081445	PC1	WC1	10.6701	0	#NAME?	#NAME?	5e-05	0.0010838	yes
TCONS_00081639	PC1	WC1	11.4127	0	#NAME?	#NAME?	5e-05	0.0010838	yes
TCONS_00081644	PC1	WC1	1.92172	0	#NAME?	#NAME?	5e-05	0.0010838	yes
TCONS_00081912	PC1	WC1	1.82879	0	#NAME?	#NAME?	5e-05	0.0010838	yes
TCONS_00082554	PC1	WC1	0.765845	0	#NAME?	#NAME?	5e-05	0.0010838	yes
TCONS_00083948	PC1	WC1	5.48107	0	#NAME?	#NAME?	5e-05	0.0010838	yes
TCONS_00084001	PC1	WC1	2.75646	0	#NAME?	#NAME?	5e-05	0.0010838	yes
TCONS_00084008	PC1	WC1	3.21456	0	#NAME?	#NAME?	5e-05	0.0010838	yes
TCONS_00084518	PC1	WC1	2.04355	0	#NAME?	#NAME?	5e-05	0.0010838	yes
TCONS_00084520	PC1	WC1	0.794789	0	#NAME?	#NAME?	5e-05	0.0010838	yes
TCONS_00085942	PC1	WC1	1.11839	0	#NAME?	#NAME?	5e-05	0.0010838	yes
TCONS_00087171	PC1	WC1	6.2866	0	#NAME?	#NAME?	5e-05	0.0010838	yes
TCONS_00087962	PC1	WC1	2.14566	0	#NAME?	#NAME?	5e-05	0.0010838	yes
TCONS_00090923	PC1	WC1	2.2696	0	#NAME?	#NAME?	5e-05	0.0010838	yes
TCONS_00092964	PC1	WC1	1.09772	0	#NAME?	#NAME?	5e-05	0.0010838	yes
TCONS_00093510	PC1	WC1	1.38138	0	#NAME?	#NAME?	5e-05	0.0010838	yes
TCONS_00093651	PC1	WC1	4.41282	0	#NAME?	#NAME?	5e-05	0.0010838	yes
TCONS_00093944	PC1	WC1	6.88054	0	#NAME?	#NAME?	5e-05	0.0010838	yes
TCONS_00094449	PC1	WC1	8.9613	0	#NAME?	#NAME?	5e-05	0.0010838	yes
TCONS_00094872	PC1	WC1	1.97717	0	#NAME?	#NAME?	5e-05	0.0010838	yes
TCONS_00095168	PC1	WC1	4.94807	0	#NAME?	#NAME?	5e-05	0.0010838	yes
TCONS_00096366	PC1	WC1	1.69566	0	#NAME?	#NAME?	5e-05	0.0010838	yes
TCONS_00097313	PC1	WC1	1.8132	0	#NAME?	#NAME?	5e-05	0.0010838	yes
TCONS_00097314	PC1	WC1	4.01781	0	#NAME?	#NAME?	5e-05	0.0010838	yes
TCONS_00098094	PC1	WC1	8.96321	0	#NAME?	#NAME?	5e-05	0.0010838	yes
TCONS_00098322	PC1	WC1	1.66656	0	#NAME?	#NAME?	5e-05	0.0010838	yes
TCONS_00098325	PC1	WC1	5.60292	0	#NAME?	#NAME?	5e-05	0.0010838	yes
TCONS_00100370	PC1	WC1	3.49786	0	#NAME?	#NAME?	5e-05	0.0010838	yes
TCONS_00100683	PC1	WC1	9.39347	0	#NAME?	#NAME?	5e-05	0.0010838	yes
TCONS_00100766	PC1	WC1	2.8449	0	#NAME?	#NAME?	5e-05	0.0010838	yes
TCONS_00102673	PC1	WC1	13.0978	0	#NAME?	#NAME?	5e-05	0.0010838	yes
TCONS_00104168	PC1	WC1	1.40634	0	#NAME?	#NAME?	5e-05	0.0010838	yes
TCONS_00104173	PC1	WC1	1.0621	0	#NAME?	#NAME?	5e-05	0.0010838	yes
TCONS_00105898	PC1	WC1	1.31609	0	#NAME?	#NAME?	5e-05	0.0010838	yes
TCONS_00106692	PC1	WC1	2.87612	0	#NAME?	#NAME?	5e-05	0.0010838	yes
TCONS_00106693	PC1	WC1	2.40421	0	#NAME?	#NAME?	5e-05	0.0010838	yes
TCONS_00106864	PC1	WC1	3.51645	0	#NAME?	#NAME?	5e-05	0.0010838	yes
TCONS_00107447	PC1	WC1	0.986639	0	#NAME?	#NAME?	5e-05	0.0010838	yes
TCONS_00107948	PC1	WC1	1.92713	0	#NAME?	#NAME?	5e-05	0.0010838	yes
TCONS_00110284	PC1	WC1	2.68607	0	#NAME?	#NAME?	5e-05	0.0010838	yes
TCONS_00110493	PC1	WC1	1.4254	0	#NAME?	#NAME?	5e-05	0.0010838	yes
TCONS_00111896	PC1	WC1	0.815335	0	#NAME?	#NAME?	5e-05	0.0010838	yes
TCONS_00112127	PC1	WC1	2.66552	0	#NAME?	#NAME?	5e-05	0.0010838	yes
TCONS_00115104	PC1	WC1	3.42282	0	#NAME?	#NAME?	5e-05	0.0010838	yes
TCONS_00118203	PC1	WC1	1.98409	0	#NAME?	#NAME?	5e-05	0.0010838	yes
TCONS_00118282	PC1	WC1	0.883136	0	#NAME?	#NAME?	5e-05	0.0010838	yes
TCONS_00118598	PC1	WC1	1.72908	0	#NAME?	#NAME?	5e-05	0.0010838	yes
TCONS_00118999	PC1	WC1	2.86438	0	#NAME?	#NAME?	5e-05	0.0010838	yes
TCONS_00119107	PC1	WC1	0.843499	0	#NAME?	#NAME?	5e-05	0.0010838	yes
TCONS_00119862	PC1	WC1	20.0145	0	#NAME?	#NAME?	5e-05	0.0010838	yes
TCONS_00120690	PC1	WC1	1.25593	0	#NAME?	#NAME?	5e-05	0.0010838	yes
TCONS_00120985	PC1	WC1	1.47803	0	#NAME?	#NAME?	5e-05	0.0010838	yes
TCONS_00120986	PC1	WC1	1.39674	0	#NAME?	#NAME?	5e-05	0.0010838	yes
TCONS_00121117	PC1	WC1	1.01935	0	#NAME?	#NAME?	5e-05	0.0010838	yes
TCONS_00121455	PC1	WC1	1.55098	0	#NAME?	#NAME?	5e-05	0.0010838	yes
TCONS_00121456	PC1	WC1	5.91062	0	#NAME?	#NAME?	5e-05	0.0010838	yes
TCONS_00121938	PC1	WC1	2.73122	0	#NAME?	#NAME?	5e-05	0.0010838	yes
TCONS_00121939	PC1	WC1	3.98723	0	#NAME?	#NAME?	5e-05	0.0010838	yes
TCONS_00122184	PC1	WC1	1.0392	0	#NAME?	#NAME?	5e-05	0.0010838	yes
TCONS_00125186	PC1	WC1	4.34865	0	#NAME?	#NAME?	5e-05	0.0010838	yes
TCONS_00125859	PC1	WC1	2.17789	0	#NAME?	#NAME?	5e-05	0.0010838	yes
TCONS_00125938	PC1	WC1	1.10976	0	#NAME?	#NAME?	5e-05	0.0010838	yes
TCONS_00126061	PC1	WC1	7.44586	0	#NAME?	#NAME?	5e-05	0.0010838	yes
TCONS_00126074	PC1	WC1	11.4809	0	#NAME?	#NAME?	5e-05	0.0010838	yes
TCONS_00126395	PC1	WC1	0.776247	0	#NAME?	#NAME?	5e-05	0.0010838	yes
TCONS_00126582	PC1	WC1	1.14273	0	#NAME?	#NAME?	5e-05	0.0010838	yes
TCONS_00126687	PC1	WC1	1.8813	0	#NAME?	#NAME?	5e-05	0.0010838	yes
TCONS_00127087	PC1	WC1	0.762963	0	#NAME?	#NAME?	5e-05	0.0010838	yes
TCONS_00127571	PC1	WC1	1.16912	0	#NAME?	#NAME?	5e-05	0.0010838	yes
TCONS_00127997	PC1	WC1	1.60604	0	#NAME?	#NAME?	5e-05	0.0010838	yes
TCONS_00128773	PC1	WC1	2.08668	0	#NAME?	#NAME?	5e-05	0.0010838	yes
TCONS_00130655	PC1	WC1	1.30405	0	#NAME?	#NAME?	5e-05	0.0010838	yes
TCONS_00131509	PC1	WC1	3.64959	0	#NAME?	#NAME?	5e-05	0.0010838	yes
TCONS_00131512	PC1	WC1	6.68014	0	#NAME?	#NAME?	5e-05	0.0010838	yes
TCONS_00131604	PC1	WC1	9.82426	0	#NAME?	#NAME?	5e-05	0.0010838	yes
TCONS_00133324	PC1	WC1	1.28883	0	#NAME?	#NAME?	5e-05	0.0010838	yes
TCONS_00134337	PC1	WC1	1.73859	0	#NAME?	#NAME?	5e-05	0.0010838	yes
TCONS_00134834	PC1	WC1	0.710841	0	#NAME?	#NAME?	5e-05	0.0010838	yes
TCONS_00135649	PC1	WC1	46.0548	0	#NAME?	#NAME?	5e-05	0.0010838	yes
TCONS_00135657	PC1	WC1	3.21522	0	#NAME?	#NAME?	5e-05	0.0010838	yes
TCONS_00135658	PC1	WC1	3.91647	0	#NAME?	#NAME?	5e-05	0.0010838	yes
TCONS_00137187	PC1	WC1	13.067	0	#NAME?	#NAME?	5e-05	0.0010838	yes
TCONS_00137419	PC1	WC1	4.37066	0	#NAME?	#NAME?	5e-05	0.0010838	yes
TCONS_00137843	PC1	WC1	1.60413	0	#NAME?	#NAME?	5e-05	0.0010838	yes
TCONS_00139566	PC1	WC1	0.855342	0	#NAME?	#NAME?	5e-05	0.0010838	yes
TCONS_00143537	PC1	WC1	1.09583	0	#NAME?	#NAME?	5e-05	0.0010838	yes
TCONS_00143830	PC1	WC1	5.48015	0	#NAME?	#NAME?	5e-05	0.0010838	yes
TCONS_00144684	PC1	WC1	1.08402	0	#NAME?	#NAME?	5e-05	0.0010838	yes
TCONS_00144860	PC1	WC1	0.963656	0	#NAME?	#NAME?	5e-05	0.0010838	yes
TCONS_00144865	PC1	WC1	1.55834	0	#NAME?	#NAME?	5e-05	0.0010838	yes
TCONS_00147012	PC1	WC1	2.72669	0	#NAME?	#NAME?	5e-05	0.0010838	yes
TCONS_00147772	PC1	WC1	3.96695	0	#NAME?	#NAME?	5e-05	0.0010838	yes
TCONS_00147773	PC1	WC1	8.56769	0	#NAME?	#NAME?	5e-05	0.0010838	yes
TCONS_00148123	PC1	WC1	1.60809	0	#NAME?	#NAME?	5e-05	0.0010838	yes
TCONS_00148725	PC1	WC1	1.01985	0	#NAME?	#NAME?	5e-05	0.0010838	yes
TCONS_00149362	PC1	WC1	8.3103	0	#NAME?	#NAME?	5e-05	0.0010838	yes
TCONS_00150248	PC1	WC1	1.13398	0	#NAME?	#NAME?	5e-05	0.0010838	yes
TCONS_00153346	PC1	WC1	1.81722	0	#NAME?	#NAME?	5e-05	0.0010838	yes
TCONS_00153515	PC1	WC1	5.25439	0	#NAME?	#NAME?	5e-05	0.0010838	yes
TCONS_00153742	PC1	WC1	1.56586	0	#NAME?	#NAME?	5e-05	0.0010838	yes
TCONS_00154316	PC1	WC1	1.03491	0	#NAME?	#NAME?	5e-05	0.0010838	yes
TCONS_00156030	PC1	WC1	1.41889	0	#NAME?	#NAME?	5e-05	0.0010838	yes
TCONS_00156589	PC1	WC1	1.18514	0	#NAME?	#NAME?	5e-05	0.0010838	yes
TCONS_00157777	PC1	WC1	1.95319	0	#NAME?	#NAME?	5e-05	0.0010838	yes
TCONS_00157779	PC1	WC1	1.8156	0	#NAME?	#NAME?	5e-05	0.0010838	yes
TCONS_00158886	PC1	WC1	1.34591	0	#NAME?	#NAME?	5e-05	0.0010838	yes
TCONS_00158997	PC1	WC1	1.24498	0	#NAME?	#NAME?	5e-05	0.0010838	yes
TCONS_00159448	PC1	WC1	8.9561	0	#NAME?	#NAME?	5e-05	0.0010838	yes
TCONS_00159942	PC1	WC1	0.849074	0	#NAME?	#NAME?	5e-05	0.0010838	yes
TCONS_00159986	PC1	WC1	5.03066	0	#NAME?	#NAME?	5e-05	0.0010838	yes
TCONS_00160212	PC1	WC1	1.79869	0	#NAME?	#NAME?	5e-05	0.0010838	yes
TCONS_00160609	PC1	WC1	1.693	0	#NAME?	#NAME?	5e-05	0.0010838	yes
TCONS_00160657	PC1	WC1	4.60378	0	#NAME?	#NAME?	5e-05	0.0010838	yes
TCONS_00162350	PC1	WC1	12.6218	0	#NAME?	#NAME?	5e-05	0.0010838	yes
TCONS_00162402	PC1	WC1	17.2319	0	#NAME?	#NAME?	5e-05	0.0010838	yes
TCONS_00162465	PC1	WC1	3.05057	0	#NAME?	#NAME?	5e-05	0.0010838	yes
TCONS_00162466	PC1	WC1	1.75081	0	#NAME?	#NAME?	5e-05	0.0010838	yes
TCONS_00162467	PC1	WC1	1.13813	0	#NAME?	#NAME?	5e-05	0.0010838	yes
TCONS_00162468	PC1	WC1	1.46215	0	#NAME?	#NAME?	5e-05	0.0010838	yes
TCONS_00162473	PC1	WC1	2.33417	0	#NAME?	#NAME?	5e-05	0.0010838	yes
TCONS_00164183	PC1	WC1	2.20566	0	#NAME?	#NAME?	5e-05	0.0010838	yes
TCONS_00164334	PC1	WC1	1.3586	0	#NAME?	#NAME?	5e-05	0.0010838	yes
TCONS_00167801	PC1	WC1	29.2429	0	#NAME?	#NAME?	5e-05	0.0010838	yes
TCONS_00168155	PC1	WC1	2.35604	0	#NAME?	#NAME?	5e-05	0.0010838	yes
TCONS_00168577	PC1	WC1	8.70688	0	#NAME?	#NAME?	5e-05	0.0010838	yes
TCONS_00170518	PC1	WC1	1.77736	0	#NAME?	#NAME?	5e-05	0.0010838	yes
TCONS_00170533	PC1	WC1	1.68409	0	#NAME?	#NAME?	5e-05	0.0010838	yes
TCONS_00172072	PC1	WC1	12.0439	0	#NAME?	#NAME?	5e-05	0.0010838	yes
TCONS_00172868	PC1	WC1	2.23976	0	#NAME?	#NAME?	5e-05	0.0010838	yes
TCONS_00173046	PC1	WC1	18.4508	0	#NAME?	#NAME?	5e-05	0.0010838	yes
TCONS_00173316	PC1	WC1	0.860415	0	#NAME?	#NAME?	5e-05	0.0010838	yes
TCONS_00173352	PC1	WC1	1.62867	0	#NAME?	#NAME?	5e-05	0.0010838	yes
TCONS_00173421	PC1	WC1	1.03982	0	#NAME?	#NAME?	5e-05	0.0010838	yes
TCONS_00174670	PC1	WC1	9.19198	0	#NAME?	#NAME?	5e-05	0.0010838	yes
TCONS_00175059	PC1	WC1	5.2942	0	#NAME?	#NAME?	5e-05	0.0010838	yes
TCONS_00175402	PC1	WC1	1.02823	0	#NAME?	#NAME?	5e-05	0.0010838	yes
TCONS_00176740	PC1	WC1	1.10724	0	#NAME?	#NAME?	5e-05	0.0010838	yes
TCONS_00177397	PC1	WC1	10.1286	0	#NAME?	#NAME?	5e-05	0.0010838	yes
TCONS_00177610	PC1	WC1	21.3936	0	#NAME?	#NAME?	5e-05	0.0010838	yes
TCONS_00179641	PC1	WC1	1.64929	0	#NAME?	#NAME?	5e-05	0.0010838	yes
TCONS_00180183	PC1	WC1	8.14565	0	#NAME?	#NAME?	5e-05	0.0010838	yes
TCONS_00180817	PC1	WC1	0.92403	0	#NAME?	#NAME?	5e-05	0.0010838	yes
TCONS_00181119	PC1	WC1	0.855351	0	#NAME?	#NAME?	5e-05	0.0010838	yes
TCONS_00184409	PC1	WC1	1.13302	0	#NAME?	#NAME?	5e-05	0.0010838	yes
TCONS_00184499	PC1	WC1	5.96911	0	#NAME?	#NAME?	5e-05	0.0010838	yes
TCONS_00185219	PC1	WC1	4.64398	0	#NAME?	#NAME?	5e-05	0.0010838	yes
TCONS_00186133	PC1	WC1	3.60248	0	#NAME?	#NAME?	5e-05	0.0010838	yes
TCONS_00189271	PC1	WC1	14.1389	0	#NAME?	#NAME?	5e-05	0.0010838	yes
TCONS_00189507	PC1	WC1	0.814432	0	#NAME?	#NAME?	5e-05	0.0010838	yes
TCONS_00192305	PC1	WC1	0.759409	0	#NAME?	#NAME?	5e-05	0.0010838	yes
TCONS_00192307	PC1	WC1	3.03395	0	#NAME?	#NAME?	5e-05	0.0010838	yes
TCONS_00192880	PC1	WC1	9.03964	0	#NAME?	#NAME?	5e-05	0.0010838	yes
TCONS_00193266	PC1	WC1	4.11398	0	#NAME?	#NAME?	5e-05	0.0010838	yes
TCONS_00194380	PC1	WC1	12.29	0	#NAME?	#NAME?	5e-05	0.0010838	yes
TCONS_00194663	PC1	WC1	1.07838	0	#NAME?	#NAME?	5e-05	0.0010838	yes
TCONS_00194811	PC1	WC1	0.896539	0	#NAME?	#NAME?	5e-05	0.0010838	yes
TCONS_00194855	PC1	WC1	1.65309	0	#NAME?	#NAME?	5e-05	0.0010838	yes
TCONS_00196275	PC1	WC1	3.28172	0	#NAME?	#NAME?	5e-05	0.0010838	yes
TCONS_00196580	PC1	WC1	4.26069	0	#NAME?	#NAME?	5e-05	0.0010838	yes
TCONS_00196941	PC1	WC1	3.39217	0	#NAME?	#NAME?	5e-05	0.0010838	yes
TCONS_00198188	PC1	WC1	0.7569	0	#NAME?	#NAME?	5e-05	0.0010838	yes
TCONS_00198589	PC1	WC1	1.44555	0	#NAME?	#NAME?	5e-05	0.0010838	yes
TCONS_00199094	PC1	WC1	10.3434	0	#NAME?	#NAME?	5e-05	0.0010838	yes
TCONS_00200011	PC1	WC1	7.76095	0	#NAME?	#NAME?	5e-05	0.0010838	yes
TCONS_00200436	PC1	WC1	30.5548	0	#NAME?	#NAME?	5e-05	0.0010838	yes
TCONS_00200549	PC1	WC1	2.40182	0	#NAME?	#NAME?	5e-05	0.0010838	yes
TCONS_00200951	PC1	WC1	1.90171	0	#NAME?	#NAME?	5e-05	0.0010838	yes
TCONS_00024248	PC1	WC1	7.64028	0	#NAME?	#NAME?	0.0001	0.00204929	yes
TCONS_00024252	PC1	WC1	2.76842	0	#NAME?	#NAME?	0.0001	0.00204929	yes
TCONS_00026909	PC1	WC1	0.860796	0	#NAME?	#NAME?	0.0001	0.00204929	yes
TCONS_00067888	PC1	WC1	9.91909	0	#NAME?	#NAME?	0.0001	0.00204929	yes
TCONS_00085356	PC1	WC1	2.70958	0	#NAME?	#NAME?	0.0001	0.00204929	yes
TCONS_00102556	PC1	WC1	3.01168	0	#NAME?	#NAME?	0.0001	0.00204929	yes
TCONS_00103083	PC1	WC1	1.71895	0	#NAME?	#NAME?	0.0001	0.00204929	yes
TCONS_00137972	PC1	WC1	2.90656	0	#NAME?	#NAME?	0.0001	0.00204929	yes
TCONS_00153815	PC1	WC1	6.23526	0	#NAME?	#NAME?	0.0001	0.00204929	yes
TCONS_00199376	PC1	WC1	1.74008	0	#NAME?	#NAME?	0.0001	0.00204929	yes
TCONS_00116553	PC1	WC1	0.95661	0	#NAME?	#NAME?	0.00015	0.00295356	yes
TCONS_00158730	PC1	WC1	1.00281	0	#NAME?	#NAME?	0.00015	0.00295356	yes
TCONS_00009719	PC1	WC1	1.44386	0	#NAME?	#NAME?	0.0002	0.00382244	yes
TCONS_00170519	PC1	WC1	4.51283	0	#NAME?	#NAME?	0.00025	0.00465413	yes
TCONS_00021730	PC1	WC1	0.636554	0	#NAME?	#NAME?	0.0003	0.00546436	yes
TCONS_00162233	PC1	WC1	0.597858	0	#NAME?	#NAME?	0.00035	0.00624916	yes
TCONS_00029535	PC1	WC1	1.92232	0	#NAME?	#NAME?	0.00055	0.00926455	yes
TCONS_00049381	PC1	WC1	4.55583	0	#NAME?	#NAME?	0.0006	0.00998639	yes
TCONS_00148917	PC1	WC1	0.90979	0	#NAME?	#NAME?	0.0006	0.00998639	yes
TCONS_00001349	PC1	WC1	6.82404	0	#NAME?	#NAME?	0.00065	0.0106968	yes
TCONS_00057657	PC1	WC1	1.16653	0	#NAME?	#NAME?	0.00065	0.0106968	yes
TCONS_00057652	PC1	WC1	2.9654	0	#NAME?	#NAME?	0.00085	0.013489	yes
TCONS_00031151	PC1	WC1	3.93217	0	#NAME?	#NAME?	0.0009	0.0141491	yes
TCONS_00048433	PC1	WC1	0.655173	0	#NAME?	#NAME?	0.00095	0.0148168	yes
TCONS_00172869	PC1	WC1	2.47578	0	#NAME?	#NAME?	0.00095	0.0148168	yes
TCONS_00001902	PC1	WC1	0.963892	0	#NAME?	#NAME?	0.001	0.0154678	yes
TCONS_00001903	PC1	WC1	1.36187	0	#NAME?	#NAME?	0.0012	0.0180478	yes
TCONS_00138489	PC1	WC1	1.68868	0	#NAME?	#NAME?	0.00135	0.0199119	yes
TCONS_00001348	PC1	WC1	2.84142	0	#NAME?	#NAME?	0.00155	0.0223609	yes
TCONS_00075225	PC1	WC1	1.6088	0	#NAME?	#NAME?	0.0017	0.0241687	yes
TCONS_00024256	PC1	WC1	2.2358	0	#NAME?	#NAME?	0.0019	0.0265243	yes
TCONS_00124663	PC1	WC1	23.7191	0	#NAME?	#NAME?	0.00205	0.0282712	yes
TCONS_00194618	PC1	WC1	0.728048	0	#NAME?	#NAME?	0.0021	0.0288575	yes
TCONS_00009307	PC1	WC1	0.632713	0	#NAME?	#NAME?	0.00215	0.0294176	yes
TCONS_00103521	PC1	WC1	0.765988	0	#NAME?	#NAME?	0.0022	0.0299734	yes
TCONS_00180182	PC1	WC1	1.07528	0	#NAME?	#NAME?	0.00275	0.0360455	yes
TCONS_00143829	PC1	WC1	1.01789	0	#NAME?	#NAME?	0.00285	0.0371111	yes
TCONS_00083947	PC1	WC1	1.76545	0	#NAME?	#NAME?	0.0032	0.0407546	yes
TCONS_00127987	PC1	WC1	1.31695	0	#NAME?	#NAME?	0.00325	0.0412715	yes
TCONS_00156029	PC1	WC1	1.72754	0	#NAME?	#NAME?	0.0034	0.0428066	yes
TCONS_00001904	PC1	WC1	1.14852	0	#NAME?	#NAME?	0.00385	0.04732	yes
TCONS_00162403	PC1	WC1	1.88677	0	#NAME?	#NAME?	0.0039	0.0478061	yes
