# Supplementary material for: Transcriptome Screening of Long Noncoding RNAs and Their Target Protein-Coding Genes Unmasks a Dynamic Portrait of Seed Coat Coloration Associated with Anthocyanins in Tibetan Hulless Barley
Source: Int J Mol Sci. 2023 Jun 24;24(13):10587. doi: 10.3390/ijms241310587 (PMC10341697; doi:10.3390/ijms241310587)
Supplement: Supplementary file 1 [file ijms-24-10587-s001.zip › Table S8. Cis-regulated target DEPCGs and their DElncRNAs.xlsx]

## Sheet: Sheet1
Table S8. Cis-regulated target DEPCGs and their DElncRNAs.
Early milk			Late milk			Soft dough
DElncRNAs	Cis-regulated target DEPCGs		DElncRNAs	Cis-regulated target DEPCGs		DElncRNAs	Cis-regulated target DEPCGs
TCONS_00043626	D1007_13541		TCONS_00116896	D1007_35836		TCONS_00035282	D1007_10989
TCONS_00043627	D1007_13541		TCONS_00116897	D1007_35836		TCONS_00181766	D1007_55876
TCONS_00043799	D1007_13541		TCONS_00107791	D1007_33260		TCONS_00181813	D1007_55876
TCONS_00107807	D1007_33270		TCONS_00107796	D1007_33260		TCONS_00181815	D1007_55876
TCONS_00107811	D1007_33270		TCONS_00107799	D1007_33260		TCONS_00181816	D1007_55876
TCONS_00107812	D1007_33270		TCONS_00107791	D1007_33261		TCONS_00181766	D1007_55877
TCONS_00107813	D1007_33270		TCONS_00107796	D1007_33261		TCONS_00181813	D1007_55877
TCONS_00108018	D1007_33270		TCONS_00107799	D1007_33261		TCONS_00181815	D1007_55877
TCONS_00108303	D1007_33270		TCONS_00107791	D1007_33258		TCONS_00181816	D1007_55877
TCONS_00108306	D1007_33270		TCONS_00107796	D1007_33258		TCONS_00181766	D1007_55875
TCONS_00107446	D1007_33151		TCONS_00107799	D1007_33258		TCONS_00181813	D1007_55875
TCONS_00107447	D1007_33151		TCONS_00200011	D1007_61761		TCONS_00181815	D1007_55875
TCONS_00107546	D1007_33151		TCONS_00200013	D1007_61761		TCONS_00181816	D1007_55875
TCONS_00009700	D1007_02890		TCONS_00169078	D1007_51943		TCONS_00074170	D1007_22971
TCONS_00009719	D1007_02890		TCONS_00169079	D1007_51943		TCONS_00058032	D1007_18021
TCONS_00073482	D1007_22707		TCONS_00169080	D1007_51943		TCONS_00058315	D1007_18021
TCONS_00028379	D1007_08746		TCONS_00169082	D1007_51943		TCONS_00058032	D1007_18025
TCONS_00084518	D1007_25876		TCONS_00004965	D1007_01274		TCONS_00058315	D1007_18025
TCONS_00049829	D1007_15292		TCONS_00097659	D1007_30234		TCONS_00058032	D1007_18023
TCONS_00050097	D1007_15292		TCONS_00097660	D1007_30234		TCONS_00058315	D1007_18023
TCONS_00050098	D1007_15292		TCONS_00109542	D1007_33725		TCONS_00116896	D1007_35838
TCONS_00106864	D1007_33021		TCONS_00109543	D1007_33725		TCONS_00116897	D1007_35838
TCONS_00106865	D1007_33021		TCONS_00109547	D1007_33725		TCONS_00116896	D1007_35836
TCONS_00019084	D1007_05812		TCONS_00072292	D1007_22230		TCONS_00116897	D1007_35836
TCONS_00019088	D1007_05812		TCONS_00072293	D1007_22230		TCONS_00126609	D1007_38915
TCONS_00139566	D1007_42880		TCONS_00077821	D1007_24005		TCONS_00158672	D1007_48723
TCONS_00172072	D1007_52823		TCONS_00077822	D1007_24005		TCONS_00119858	D1007_36727
TCONS_00144860	D1007_44511		TCONS_00154864	D1007_47591		TCONS_00119858	D1007_36728
TCONS_00144861	D1007_44511		TCONS_00154865	D1007_47591		TCONS_00126605	D1007_38960
TCONS_00144864	D1007_44511		TCONS_00154867	D1007_47591		TCONS_00169028	D1007_51938
TCONS_00144865	D1007_44511		TCONS_00154868	D1007_47591		TCONS_00169067	D1007_51938
TCONS_00144866	D1007_44511		TCONS_00154869	D1007_47591		TCONS_00169078	D1007_51938
TCONS_00098322	D1007_30332		TCONS_00154864	D1007_47594		TCONS_00169079	D1007_51938
TCONS_00098323	D1007_30332		TCONS_00154865	D1007_47594		TCONS_00169080	D1007_51938
TCONS_00098324	D1007_30332		TCONS_00154867	D1007_47594		TCONS_00107791	D1007_33260
TCONS_00098325	D1007_30332		TCONS_00154868	D1007_47594		TCONS_00107796	D1007_33260
TCONS_00098326	D1007_30332		TCONS_00154869	D1007_47594		TCONS_00107799	D1007_33260
TCONS_00098327	D1007_30332		TCONS_00052981	D1007_16400		TCONS_00107791	D1007_33261
TCONS_00000799	D1007_00171		TCONS_00049168	D1007_15129		TCONS_00107796	D1007_33261
TCONS_00047612	D1007_14588		TCONS_00049169	D1007_15129		TCONS_00107799	D1007_33261
TCONS_00063682	D1007_19476		TCONS_00195063	D1007_60169		TCONS_00200011	D1007_61761
TCONS_00057649	D1007_17874		TCONS_00195096	D1007_60169		TCONS_00200013	D1007_61761
TCONS_00057650	D1007_17874		TCONS_00067855	D1007_20999		TCONS_00061128	D1007_18926
TCONS_00057651	D1007_17874		TCONS_00067857	D1007_20999		TCONS_00061129	D1007_18926
TCONS_00057652	D1007_17874		TCONS_00067862	D1007_20999		TCONS_00061162	D1007_18926
TCONS_00057655	D1007_17874		TCONS_00067864	D1007_20999		TCONS_00061165	D1007_18926
TCONS_00057657	D1007_17874		TCONS_00067887	D1007_20999		TCONS_00169078	D1007_51943
TCONS_00057658	D1007_17874		TCONS_00067888	D1007_20999		TCONS_00169079	D1007_51943
TCONS_00057659	D1007_17874		TCONS_00067889	D1007_20999		TCONS_00169080	D1007_51943
TCONS_00057777	D1007_17874		TCONS_00138926	D1007_42774		TCONS_00169082	D1007_51943
TCONS_00009718	D1007_02817		TCONS_00138927	D1007_42774		TCONS_00103216	D1007_31918
TCONS_00174670	D1007_53518		TCONS_00139067	D1007_42774		TCONS_00103217	D1007_31918
TCONS_00194618	D1007_60044		TCONS_00139068	D1007_42774		TCONS_00103218	D1007_31918
TCONS_00194629	D1007_60044		TCONS_00139069	D1007_42774		TCONS_00067369	D1007_20831
TCONS_00194618	D1007_60045		TCONS_00139076	D1007_42774		TCONS_00067370	D1007_20831
TCONS_00194629	D1007_60045		TCONS_00139077	D1007_42774		TCONS_00145643	D1007_44806
TCONS_00053288	D1007_16562		TCONS_00139078	D1007_42774		TCONS_00145646	D1007_44806
TCONS_00053289	D1007_16562		TCONS_00139079	D1007_42774		TCONS_00145775	D1007_44806
TCONS_00198134	D1007_61123		TCONS_00139080	D1007_42774		TCONS_00160276	D1007_49230
TCONS_00198135	D1007_61123		TCONS_00138926	D1007_42772		TCONS_00038870	D1007_11913
TCONS_00198136	D1007_61123		TCONS_00138927	D1007_42772		TCONS_00038871	D1007_11913
TCONS_00198188	D1007_61123		TCONS_00139067	D1007_42772		TCONS_00067242	D1007_20857
TCONS_00100307	D1007_30979		TCONS_00139068	D1007_42772		TCONS_00067251	D1007_20857
TCONS_00100370	D1007_30979		TCONS_00139069	D1007_42772		TCONS_00067412	D1007_20850
TCONS_00162402	D1007_49910		TCONS_00139076	D1007_42772		TCONS_00067413	D1007_20850
TCONS_00162403	D1007_49910		TCONS_00139077	D1007_42772		TCONS_00067414	D1007_20850
TCONS_00162473	D1007_49910		TCONS_00139078	D1007_42772		TCONS_00087557	D1007_27013
TCONS_00071944	D1007_22330		TCONS_00139079	D1007_42772		TCONS_00087558	D1007_27013
TCONS_00145804	D1007_44844		TCONS_00139080	D1007_42772		TCONS_00087559	D1007_27013
TCONS_00063462	D1007_19548		TCONS_00073484	D1007_22743		TCONS_00067242	D1007_20861
TCONS_00063463	D1007_19548		TCONS_00027135	D1007_08422		TCONS_00067251	D1007_20861
TCONS_00063464	D1007_19548		TCONS_00098322	D1007_30335		TCONS_00038870	D1007_11921
TCONS_00063689	D1007_19548		TCONS_00098323	D1007_30335		TCONS_00038871	D1007_11921
TCONS_00077406	D1007_23926		TCONS_00098324	D1007_30335		TCONS_00097659	D1007_30234
TCONS_00077924	D1007_23926		TCONS_00098325	D1007_30335		TCONS_00097660	D1007_30234
TCONS_00113460	D1007_34931		TCONS_00098326	D1007_30335		TCONS_00031149	D1007_09643
TCONS_00107875	D1007_33306		TCONS_00098327	D1007_30335		TCONS_00031150	D1007_09643
TCONS_00108110	D1007_33306		TCONS_00101464	D1007_31273		TCONS_00031151	D1007_09643
TCONS_00108312	D1007_33306		TCONS_00101465	D1007_31273		TCONS_00031177	D1007_09643
TCONS_00108313	D1007_33306		TCONS_00101467	D1007_31273		TCONS_00180781	D1007_55581
TCONS_00108314	D1007_33306		TCONS_00200436	D1007_61912		TCONS_00180782	D1007_55581
TCONS_00108315	D1007_33306		TCONS_00118877	D1007_36550		TCONS_00180783	D1007_55581
TCONS_00108316	D1007_33306		TCONS_00118995	D1007_36550		TCONS_00180785	D1007_55581
TCONS_00166113	D1007_51071		TCONS_00118996	D1007_36550		TCONS_00180786	D1007_55581
TCONS_00154461	D1007_47516		TCONS_00118997	D1007_36550		TCONS_00112724	D1007_34642
TCONS_00154528	D1007_47516		TCONS_00106864	D1007_33021		TCONS_00180781	D1007_55577
TCONS_00154529	D1007_47516		TCONS_00106865	D1007_33021		TCONS_00180782	D1007_55577
TCONS_00180042	D1007_55383		TCONS_00019084	D1007_05812		TCONS_00180783	D1007_55577
TCONS_00180129	D1007_55383		TCONS_00019088	D1007_05812		TCONS_00180785	D1007_55577
TCONS_00180141	D1007_55383		TCONS_00143536	D1007_44195		TCONS_00180786	D1007_55577
TCONS_00143532	D1007_44142		TCONS_00143537	D1007_44195		TCONS_00036663	D1007_11515
TCONS_00068209	D1007_21095		TCONS_00000799	D1007_00171		TCONS_00036665	D1007_11515
TCONS_00068210	D1007_21095		TCONS_00000661	D1007_00162		TCONS_00073110	D1007_22649
TCONS_00068215	D1007_21095		TCONS_00000662	D1007_00162		TCONS_00073481	D1007_22649
TCONS_00068274	D1007_21095		TCONS_00000663	D1007_00162		TCONS_00073110	D1007_22650
TCONS_00068275	D1007_21095		TCONS_00000664	D1007_00162		TCONS_00073481	D1007_22650
TCONS_00183072	D1007_56294		TCONS_00000665	D1007_00162		TCONS_00186209	D1007_57321
TCONS_00183096	D1007_56294		TCONS_00000666	D1007_00162		TCONS_00186210	D1007_57321
TCONS_00042411	D1007_13113		TCONS_00000798	D1007_00162		TCONS_00072292	D1007_22230
TCONS_00196991	D1007_60779		TCONS_00046411	D1007_14317		TCONS_00072293	D1007_22230
TCONS_00200102	D1007_61793		TCONS_00046512	D1007_14317		TCONS_00083558	D1007_25706
TCONS_00200104	D1007_61793		TCONS_00049432	D1007_15224		TCONS_00107951	D1007_33370
TCONS_00053393	D1007_16576		TCONS_00198134	D1007_61123		TCONS_00107953	D1007_33370
TCONS_00081792	D1007_25175		TCONS_00198135	D1007_61123		TCONS_00108321	D1007_33370
TCONS_00199045	D1007_61473		TCONS_00198136	D1007_61123		TCONS_00108322	D1007_33370
TCONS_00010724	D1007_03161		TCONS_00198188	D1007_61123		TCONS_00108323	D1007_33370
TCONS_00163929	D1007_50334		TCONS_00192305	D1007_59276		TCONS_00064997	D1007_20069
TCONS_00077406	D1007_23925		TCONS_00192307	D1007_59276		TCONS_00064998	D1007_20069
TCONS_00077924	D1007_23925		TCONS_00127494	D1007_39201		TCONS_00111325	D1007_34236
TCONS_00166113	D1007_51072		TCONS_00178474	D1007_54876		TCONS_00111326	D1007_34236
TCONS_00118877	D1007_36550		TCONS_00049829	D1007_15292		TCONS_00111327	D1007_34236
TCONS_00118995	D1007_36550		TCONS_00050097	D1007_15292		TCONS_00111328	D1007_34236
TCONS_00118996	D1007_36550		TCONS_00050098	D1007_15292		TCONS_00111329	D1007_34236
TCONS_00118997	D1007_36550		TCONS_00170130	D1007_52268		TCONS_00111330	D1007_34236
TCONS_00157651	D1007_48443		TCONS_00170131	D1007_52268		TCONS_00111331	D1007_34236
TCONS_00180817	D1007_55600		TCONS_00170133	D1007_52268		TCONS_00111333	D1007_34236
TCONS_00180882	D1007_55600		TCONS_00170240	D1007_52268		TCONS_00040368	D1007_12497
TCONS_00137869	D1007_42406		TCONS_00170110	D1007_52264		TCONS_00025986	D1007_07917
TCONS_00137881	D1007_42406		TCONS_00170237	D1007_52264		TCONS_00025988	D1007_07917
TCONS_00137883	D1007_42406		TCONS_00170316	D1007_52264		TCONS_00093097	D1007_28829
TCONS_00137972	D1007_42406		TCONS_00159739	D1007_49076		TCONS_00093099	D1007_28829
TCONS_00174670	D1007_53521		TCONS_00093955	D1007_29002		TCONS_00093128	D1007_28829
TCONS_00098094	D1007_30300		TCONS_00152519	D1007_46868		TCONS_00093130	D1007_28829
TCONS_00019691	D1007_06014		TCONS_00152648	D1007_46868		TCONS_00093132	D1007_28829
TCONS_00073076	D1007_22608		TCONS_00152648	D1007_46875		TCONS_00093137	D1007_28829
TCONS_00143829	D1007_44307		TCONS_00033826	D1007_10452		TCONS_00093138	D1007_28829
TCONS_00143830	D1007_44307		TCONS_00033827	D1007_10452		TCONS_00093139	D1007_28829
TCONS_00143941	D1007_44307		TCONS_00107446	D1007_33150		TCONS_00093140	D1007_28829
TCONS_00162083	D1007_49807		TCONS_00107447	D1007_33150		TCONS_00093308	D1007_28829
TCONS_00162125	D1007_49807		TCONS_00107546	D1007_33150		TCONS_00082573	D1007_25380
TCONS_00162126	D1007_49807		TCONS_00043626	D1007_13541		TCONS_00082574	D1007_25380
TCONS_00162127	D1007_49807		TCONS_00043627	D1007_13541		TCONS_00160532	D1007_49334
TCONS_00162128	D1007_49807		TCONS_00043799	D1007_13541		TCONS_00160533	D1007_49334
TCONS_00162132	D1007_49807		TCONS_00107446	D1007_33151		TCONS_00166673	D1007_51205
TCONS_00162149	D1007_49807		TCONS_00107447	D1007_33151		TCONS_00166674	D1007_51205
TCONS_00196275	D1007_60524		TCONS_00107546	D1007_33151		TCONS_00166675	D1007_51205
TCONS_00080691	D1007_24796		TCONS_00084471	D1007_25989		TCONS_00166676	D1007_51205
TCONS_00186087	D1007_57275		TCONS_00084480	D1007_25989		TCONS_00166677	D1007_51205
TCONS_00186088	D1007_57275		TCONS_00084523	D1007_25989		TCONS_00156204	D1007_48028
TCONS_00186089	D1007_57275		TCONS_00084524	D1007_25989		TCONS_00156308	D1007_48028
TCONS_00186091	D1007_57275		TCONS_00084525	D1007_25989		TCONS_00156309	D1007_48028
TCONS_00186133	D1007_57275		TCONS_00084526	D1007_25989		TCONS_00170942	D1007_52516
TCONS_00186154	D1007_57275		TCONS_00084527	D1007_25989		TCONS_00170943	D1007_52516
TCONS_00054709	D1007_16996		TCONS_00061047	D1007_18849		TCONS_00170946	D1007_52516
TCONS_00054753	D1007_16996		TCONS_00061049	D1007_18849		TCONS_00171022	D1007_52516
TCONS_00054755	D1007_16996		TCONS_00139587	D1007_42972		TCONS_00171023	D1007_52516
TCONS_00054756	D1007_16996		TCONS_00139647	D1007_42972		TCONS_00156204	D1007_48027
TCONS_00000799	D1007_00172		TCONS_00011249	D1007_03376		TCONS_00156308	D1007_48027
TCONS_00000799	D1007_00164		TCONS_00011251	D1007_03376		TCONS_00156309	D1007_48027
TCONS_00060541	D1007_18718		TCONS_00011252	D1007_03376		TCONS_00060284	D1007_18678
TCONS_00198134	D1007_61134		TCONS_00056024	D1007_17336		TCONS_00060284	D1007_18677
TCONS_00198135	D1007_61134		TCONS_00166113	D1007_51072		TCONS_00067855	D1007_20999
TCONS_00198136	D1007_61134		TCONS_00184571	D1007_56759		TCONS_00067857	D1007_20999
TCONS_00198188	D1007_61134		TCONS_00108307	D1007_33288		TCONS_00067862	D1007_20999
			TCONS_00108307	D1007_33289		TCONS_00067864	D1007_20999
			TCONS_00090659	D1007_27885		TCONS_00067887	D1007_20999
			TCONS_00107860	D1007_33292		TCONS_00067888	D1007_20999
			TCONS_00107861	D1007_33292		TCONS_00067889	D1007_20999
			TCONS_00107862	D1007_33292		TCONS_00102556	D1007_31647
			TCONS_00107865	D1007_33292		TCONS_00102697	D1007_31647
			TCONS_00107866	D1007_33292		TCONS_00087893	D1007_27152
			TCONS_00107867	D1007_33292		TCONS_00088226	D1007_27152
			TCONS_00108309	D1007_33292		TCONS_00088227	D1007_27152
			TCONS_00108310	D1007_33292		TCONS_00013193	D1007_04023
			TCONS_00134099	D1007_41315		TCONS_00013194	D1007_04023
			TCONS_00134100	D1007_41315		TCONS_00013198	D1007_04023
			TCONS_00134180	D1007_41315		TCONS_00060540	D1007_18697
			TCONS_00069772	D1007_21536		TCONS_00001865	D1007_00513
			TCONS_00069772	D1007_21534		TCONS_00001996	D1007_00513
			TCONS_00077925	D1007_23936		TCONS_00162083	D1007_49807
			TCONS_00154014	D1007_47350		TCONS_00162125	D1007_49807
			TCONS_00096361	D1007_29705		TCONS_00162126	D1007_49807
			TCONS_00096362	D1007_29705		TCONS_00162127	D1007_49807
			TCONS_00096363	D1007_29705		TCONS_00162128	D1007_49807
			TCONS_00057088	D1007_17564		TCONS_00162132	D1007_49807
			TCONS_00118135	D1007_36297		TCONS_00162149	D1007_49807
			TCONS_00118137	D1007_36297		TCONS_00103964	D1007_32155
			TCONS_00071082	D1007_21840		TCONS_00103965	D1007_32155
			TCONS_00159739	D1007_49069		TCONS_00103976	D1007_32155
			TCONS_00159853	D1007_49069		TCONS_00103977	D1007_32155
			TCONS_00028379	D1007_08746		TCONS_00101464	D1007_31273
			TCONS_00021802	D1007_06680		TCONS_00101465	D1007_31273
			TCONS_00022009	D1007_06680		TCONS_00101467	D1007_31273
			TCONS_00022010	D1007_06680		TCONS_00118995	D1007_36555
			TCONS_00019691	D1007_06014		TCONS_00118996	D1007_36555
			TCONS_00073076	D1007_22608		TCONS_00118997	D1007_36555
			TCONS_00009204	D1007_02747		TCONS_00143266	D1007_44160
			TCONS_00009205	D1007_02747		TCONS_00143267	D1007_44160
			TCONS_00047750	D1007_14600		TCONS_00143466	D1007_44160
			TCONS_00101464	D1007_31281		TCONS_00143533	D1007_44160
			TCONS_00101465	D1007_31281		TCONS_00143534	D1007_44160
			TCONS_00101467	D1007_31281		TCONS_00143535	D1007_44160
			TCONS_00126605	D1007_38959		TCONS_00011822	D1007_03635
			TCONS_00200281	D1007_61854		TCONS_00011824	D1007_03635
			TCONS_00200282	D1007_61854		TCONS_00012585	D1007_03635
			TCONS_00182978	D1007_56263		TCONS_00103964	D1007_32159
			TCONS_00182994	D1007_56263		TCONS_00103965	D1007_32159
			TCONS_00112127	D1007_34495		TCONS_00103976	D1007_32159
			TCONS_00112136	D1007_34495		TCONS_00103977	D1007_32159
			TCONS_00118995	D1007_36551		TCONS_00106864	D1007_33021
			TCONS_00118996	D1007_36551		TCONS_00106865	D1007_33021
			TCONS_00118997	D1007_36551		TCONS_00143536	D1007_44195
			TCONS_00103964	D1007_32159		TCONS_00143537	D1007_44195
			TCONS_00103965	D1007_32159		TCONS_00000799	D1007_00171
			TCONS_00103976	D1007_32159		TCONS_00000661	D1007_00162
			TCONS_00103977	D1007_32159		TCONS_00000662	D1007_00162
			TCONS_00118999	D1007_36559		TCONS_00000663	D1007_00162
			TCONS_00121117	D1007_37301		TCONS_00000664	D1007_00162
			TCONS_00121118	D1007_37301		TCONS_00000665	D1007_00162
			TCONS_00052981	D1007_16402		TCONS_00000666	D1007_00162
			TCONS_00090055	D1007_27777		TCONS_00000798	D1007_00162
			TCONS_00090087	D1007_27777		TCONS_00199103	D1007_61507
			TCONS_00090113	D1007_27777		TCONS_00199104	D1007_61507
			TCONS_00090114	D1007_27777		TCONS_00199111	D1007_61507
			TCONS_00090115	D1007_27777		TCONS_00199117	D1007_61507
			TCONS_00088995	D1007_27416		TCONS_00000799	D1007_00166
			TCONS_00088996	D1007_27416		TCONS_00046411	D1007_14317
			TCONS_00060346	D1007_18728		TCONS_00046512	D1007_14317
			TCONS_00060542	D1007_18728		TCONS_00060540	D1007_18702
			TCONS_00099640	D1007_30817		TCONS_00049432	D1007_15224
			TCONS_00099657	D1007_30817		TCONS_00029047	D1007_08926
			TCONS_00099658	D1007_30817		TCONS_00029288	D1007_08926
			TCONS_00092328	D1007_28506		TCONS_00029289	D1007_08926
			TCONS_00060223	D1007_18632		TCONS_00029290	D1007_08926
			TCONS_00198134	D1007_61134		TCONS_00028787	D1007_08919
			TCONS_00198135	D1007_61134		TCONS_00029047	D1007_08919
			TCONS_00198136	D1007_61134		TCONS_00029288	D1007_08919
			TCONS_00198188	D1007_61134		TCONS_00029047	D1007_08924
			TCONS_00022484	D1007_06763		TCONS_00029288	D1007_08924
			TCONS_00199376	D1007_61594		TCONS_00029289	D1007_08924
			TCONS_00057048	D1007_17678		TCONS_00029290	D1007_08924
			TCONS_00057049	D1007_17678		TCONS_00171509	D1007_52651
			TCONS_00057051	D1007_17678		TCONS_00192305	D1007_59276
			TCONS_00057052	D1007_17678		TCONS_00192307	D1007_59276
			TCONS_00057053	D1007_17678		TCONS_00025340	D1007_07669
			TCONS_00057055	D1007_17678		TCONS_00120690	D1007_37061
			TCONS_00057093	D1007_17678		TCONS_00170130	D1007_52268
			TCONS_00105983	D1007_32745		TCONS_00170131	D1007_52268
			TCONS_00166113	D1007_51071		TCONS_00170133	D1007_52268
			TCONS_00118079	D1007_36302		TCONS_00170240	D1007_52268
			TCONS_00118201	D1007_36302		TCONS_00101189	D1007_31324
			TCONS_00179050	D1007_55035		TCONS_00101468	D1007_31324
			TCONS_00175100	D1007_53719		TCONS_00101469	D1007_31324
			TCONS_00053424	D1007_16571		TCONS_00101470	D1007_31324
			TCONS_00061507	D1007_18982		TCONS_00016422	D1007_05041
			TCONS_00085179	D1007_26184		TCONS_00016426	D1007_05041
			TCONS_00085182	D1007_26184		TCONS_00016752	D1007_05041
			TCONS_00201530	D1007_62259		TCONS_00016754	D1007_05041
			TCONS_00201532	D1007_62259		TCONS_00016755	D1007_05041
			TCONS_00201538	D1007_62259		TCONS_00016756	D1007_05041
			TCONS_00134099	D1007_41311		TCONS_00170110	D1007_52264
			TCONS_00134100	D1007_41311		TCONS_00170237	D1007_52264
			TCONS_00134180	D1007_41311		TCONS_00170316	D1007_52264
			TCONS_00107875	D1007_33306		TCONS_00037611	D1007_11704
			TCONS_00108110	D1007_33306		TCONS_00038068	D1007_11704
			TCONS_00108312	D1007_33306		TCONS_00038335	D1007_11704
			TCONS_00108313	D1007_33306		TCONS_00038336	D1007_11704
			TCONS_00108314	D1007_33306		TCONS_00113260	D1007_34813
			TCONS_00108315	D1007_33306		TCONS_00113353	D1007_34813
			TCONS_00108316	D1007_33306		TCONS_00065392	D1007_20225
			TCONS_00055518	D1007_17296		TCONS_00065427	D1007_20225
			TCONS_00024038	D1007_07281		TCONS_00193666	D1007_59742
			TCONS_00096906	D1007_29926		TCONS_00186863	D1007_57542
			TCONS_00053668	D1007_16632		TCONS_00186864	D1007_57542
			TCONS_00053669	D1007_16632		TCONS_00186865	D1007_57542
			TCONS_00053670	D1007_16632		TCONS_00186866	D1007_57542
						TCONS_00186951	D1007_57542
						TCONS_00043626	D1007_13541
						TCONS_00043627	D1007_13541
						TCONS_00043799	D1007_13541
						TCONS_00126398	D1007_38844
						TCONS_00071382	D1007_22029
						TCONS_00071383	D1007_22029
						TCONS_00075452	D1007_23326
						TCONS_00075453	D1007_23326
						TCONS_00075454	D1007_23326
						TCONS_00075650	D1007_23326
						TCONS_00158535	D1007_48631
						TCONS_00149833	D1007_46021
						TCONS_00149841	D1007_46021
						TCONS_00149833	D1007_46023
						TCONS_00149841	D1007_46023
						TCONS_00149833	D1007_46017
						TCONS_00110596	D1007_34028
						TCONS_00012593	D1007_03796
						TCONS_00090055	D1007_27777
						TCONS_00090087	D1007_27777
						TCONS_00090113	D1007_27777
						TCONS_00090114	D1007_27777
						TCONS_00090115	D1007_27777
						TCONS_00156966	D1007_48233
						TCONS_00129387	D1007_39760
						TCONS_00129388	D1007_39760
						TCONS_00129390	D1007_39760
						TCONS_00163318	D1007_50123
						TCONS_00163319	D1007_50123
						TCONS_00163320	D1007_50123
						TCONS_00163321	D1007_50123
						TCONS_00163042	D1007_50121
						TCONS_00163318	D1007_50121
						TCONS_00163319	D1007_50121
						TCONS_00163320	D1007_50121
						TCONS_00163321	D1007_50121
						TCONS_00139587	D1007_42971
						TCONS_00139647	D1007_42971
						TCONS_00050099	D1007_15375
						TCONS_00050100	D1007_15375
						TCONS_00145804	D1007_44844
						TCONS_00134882	D1007_41564
						TCONS_00134883	D1007_41564
						TCONS_00134885	D1007_41564
						TCONS_00134099	D1007_41315
						TCONS_00134100	D1007_41315
						TCONS_00134180	D1007_41315
						TCONS_00038395	D1007_11931
						TCONS_00038872	D1007_11931
						TCONS_00038873	D1007_11931
						TCONS_00134099	D1007_41307
						TCONS_00134100	D1007_41307
						TCONS_00134180	D1007_41307
						TCONS_00069772	D1007_21536
						TCONS_00069772	D1007_21534
						TCONS_00180932	D1007_55627
						TCONS_00055518	D1007_17297
						TCONS_00103768	D1007_32108
						TCONS_00048576	D1007_14928
						TCONS_00048577	D1007_14928
						TCONS_00048578	D1007_14928
						TCONS_00098062	D1007_30089
						TCONS_00098063	D1007_30089
						TCONS_00098062	D1007_30090
						TCONS_00098063	D1007_30090
						TCONS_00072218	D1007_22347
						TCONS_00072298	D1007_22347
						TCONS_00132936	D1007_40915
						TCONS_00132936	D1007_40918
						TCONS_00107860	D1007_33292
						TCONS_00107861	D1007_33292
						TCONS_00107862	D1007_33292
						TCONS_00107865	D1007_33292
						TCONS_00107866	D1007_33292
						TCONS_00107867	D1007_33292
						TCONS_00108309	D1007_33292
						TCONS_00108310	D1007_33292
						TCONS_00183072	D1007_56294
						TCONS_00183096	D1007_56294
						TCONS_00107860	D1007_33294
						TCONS_00107861	D1007_33294
						TCONS_00107862	D1007_33294
						TCONS_00107865	D1007_33294
						TCONS_00107866	D1007_33294
						TCONS_00107867	D1007_33294
						TCONS_00108309	D1007_33294
						TCONS_00108310	D1007_33294
						TCONS_00178170	D1007_54806
						TCONS_00088659	D1007_27319
						TCONS_00015445	D1007_04786
						TCONS_00015865	D1007_04786
						TCONS_00188131	D1007_58029
						TCONS_00188235	D1007_58029
						TCONS_00188236	D1007_58029
						TCONS_00053424	D1007_16571
						TCONS_00071082	D1007_21840
						TCONS_00127565	D1007_39146
						TCONS_00127566	D1007_39146
						TCONS_00127567	D1007_39146
						TCONS_00187696	D1007_57836
						TCONS_00144684	D1007_44500
						TCONS_00183879	D1007_56530
						TCONS_00183880	D1007_56530
						TCONS_00177610	D1007_54582
						TCONS_00177610	D1007_54584
						TCONS_00042193	D1007_12977
						TCONS_00008863	D1007_02602
						TCONS_00023513	D1007_07183
						TCONS_00027836	D1007_08266
						TCONS_00027837	D1007_08266
						TCONS_00101464	D1007_31281
						TCONS_00101465	D1007_31281
						TCONS_00101467	D1007_31281
						TCONS_00119858	D1007_36726
						TCONS_00162402	D1007_49910
						TCONS_00162403	D1007_49910
						TCONS_00162473	D1007_49910
						TCONS_00162402	D1007_49911
						TCONS_00162403	D1007_49911
						TCONS_00162473	D1007_49911
						TCONS_00155011	D1007_47679
						TCONS_00155012	D1007_47679
						TCONS_00155118	D1007_47679
						TCONS_00126605	D1007_38962
						TCONS_00196831	D1007_60745
						TCONS_00196848	D1007_60745
						TCONS_00196849	D1007_60745
						TCONS_00196850	D1007_60745
						TCONS_00196851	D1007_60745
						TCONS_00196852	D1007_60745
						TCONS_00196853	D1007_60745
						TCONS_00196854	D1007_60745
						TCONS_00196855	D1007_60745
						TCONS_00196856	D1007_60745
						TCONS_00196858	D1007_60745
						TCONS_00196859	D1007_60745
						TCONS_00118999	D1007_36559
						TCONS_00110596	D1007_34030
						TCONS_00025986	D1007_07912
						TCONS_00025988	D1007_07912
						TCONS_00018281	D1007_05547
						TCONS_00018282	D1007_05547
						TCONS_00018283	D1007_05547
						TCONS_00018434	D1007_05547
						TCONS_00018435	D1007_05547
						TCONS_00018437	D1007_05547
						TCONS_00018558	D1007_05547
						TCONS_00018559	D1007_05547
						TCONS_00018560	D1007_05547
						TCONS_00099640	D1007_30817
						TCONS_00099657	D1007_30817
						TCONS_00099658	D1007_30817
						TCONS_00129387	D1007_39766
						TCONS_00129388	D1007_39766
						TCONS_00129390	D1007_39766
						TCONS_00045387	D1007_14037
						TCONS_00070990	D1007_21932
						TCONS_00071087	D1007_21932
						TCONS_00191513	D1007_59048
						TCONS_00191514	D1007_59048
						TCONS_00191515	D1007_59048
						TCONS_00191516	D1007_59048
						TCONS_00191517	D1007_59048
						TCONS_00191613	D1007_59048
						TCONS_00191614	D1007_59048
						TCONS_00198454	D1007_61233
						TCONS_00081644	D1007_25167
						TCONS_00095164	D1007_29333
						TCONS_00134099	D1007_41311
						TCONS_00134100	D1007_41311
						TCONS_00134180	D1007_41311
						TCONS_00137953	D1007_42443
						TCONS_00137978	D1007_42443
						TCONS_00051992	D1007_16060
						TCONS_00077698	D1007_23938
						TCONS_00077925	D1007_23938
						TCONS_00103768	D1007_32111
						TCONS_00103768	D1007_32112
						TCONS_00024038	D1007_07281
						TCONS_00001395	D1007_00329
						TCONS_00194241	D1007_59896
						TCONS_00179050	D1007_55035
						TCONS_00053668	D1007_16632
						TCONS_00053669	D1007_16632
						TCONS_00053670	D1007_16632
						TCONS_00078862	D1007_24355
						TCONS_00199722	D1007_61693
						TCONS_00055518	D1007_17304
						TCONS_00061507	D1007_18982
						TCONS_00199044	D1007_61470
