# Supplementary material for: Transcriptome Screening of Long Noncoding RNAs and Their Target Protein-Coding Genes Unmasks a Dynamic Portrait of Seed Coat Coloration Associated with Anthocyanins in Tibetan Hulless Barley
Source: Int J Mol Sci. 2023 Jun 24;24(13):10587. doi: 10.3390/ijms241310587 (PMC10341697; doi:10.3390/ijms241310587)
Supplement: Supplementary file 1 [file ijms-24-10587-s001.zip › Table S9. DElncRNAs and their cis-regulated DEPCGs associated with anthocyanin synthesis.xlsx]

## Sheet: Sheet1
Table S9. DElncRNAs and their cis-regulated DEPCGs associated with anthocyanin synthesis.
Gene description		ID	WC1	WC2	W3	PC1	PC2	PC3
		TCONS_00180141	17.4343	0	0	0	3.29958	0.844216
Flavonoid 3',5'-hydroxylase 1-like (F3'5'H)	F3'5'H	D1007_47591	0	8.06424	23.2915	0.138014	33.8729	23.2343
		TCONS_00069772	27.6861	12.3427	9.57922	0	0	0
Anthocyanin 5-aromatic acyltransferase	ACT	D1007_21536	0.630751	0.362983	0.510966	0.279907	39.4649	246.041
Anthocyanin 5-aromatic acyltransferase		D1007_21534	1.62119	1.89352	1.13424	1.70032	87.9536	529.022
		TCONS_00087557	0	0	0	0	1.80322	20.1248
Putative rhamnosyl transferase 1	UGT	D1007_27013	0.0799775	1.05407	1.84264	0.120753	1.58711	9.69611
		TCONS_00143533	0	0	0	0	0	2.18701
Naringenin,2-oxoglutarate 3-dioxygenase (F3H)	F3H	D1007_44160	4.05768	2.99631	1.91544	0.783041	3.82605	17.1613
		TCONS_00129388	0.00744265	0.01586	0	0.341937	2.01907	0.654966
Cytosolic acetyl-CoA carboxylase	ACC	D1007_39760	28.6537	5.32259	3.7657	21.9718	6.16085	16.9499
