# Supplementary material for: Transcriptome Screening of Long Noncoding RNAs and Their Target Protein-Coding Genes Unmasks a Dynamic Portrait of Seed Coat Coloration Associated with Anthocyanins in Tibetan Hulless Barley
Source: Int J Mol Sci. 2023 Jun 24;24(13):10587. doi: 10.3390/ijms241310587 (PMC10341697; doi:10.3390/ijms241310587)
Supplement: Supplementary file 1 [file ijms-24-10587-s001.zip › Table S10. Expression pattern of cis-regulated DETFs and their DElncRNAs in the early milk and soft dough stages.xlsx]

## Sheet: Sheet1
Table S10. Expression pattern of cis-regulated DETFs and their DElncRNAs in the early milk and soft dough stages.
ID	WC1	WC2	W3	PC1	PC2	PC3
TCONS_00047612	8.62277	12.4897	6.66513	20.2969	19.772	22.2347
D1007_14588	1.03614	0.937567	1.7413	3.95088	1.53214	1.36376
TCONS_00186133	0	0	0	3.60248	2.28172	0.92712
D1007_57275	10.2059	12.5452	7.25149	4.23274	4.87323	4.9871
TCONS_00084518	0	0	0	2.04355	1.29428	1.57934
D1007_25876	6.07363	46.8369	52.1948	15.1144	71.4533	27.8193
TCONS_00058315	0	0	0	0	0.523914	2.38855
D1007_18021	0.18033	7.0422	14.4109	0.322137	10.8334	38.7513
D1007_18025	0.0224842	2.66083	6.14705	0	1.36821	46.42
D1007_18023	0.333514	2.33709	2.78015	0.133425	3.49583	19.4357
TCONS_00116897	0	0	0	0	0	1.53613
D1007_35838	0.967303	6.87903	12.6254	0.449584	4.3629	49.9994
TCONS_00196859	2.65375	1.75314	1.40896	1.66855	2.99709	3.68306
D1007_60745	9.89972	18.2531	19.5648	6.52323	5.54857	5.70019
TCONS_00025986	0	0	0	0	0.661569	3.09274
D1007_07917	0.0330564	1.13096	2.46531	0.0843657	1.61693	28.1297
D1007_07912	8.10704	21.9907	41.8679	14.5383	16.2017	18.6266
TCONS_00082574	0.203225	0	0	3.02238	0.0985363	1.84478
D1007_25380	0.121004	0.535908	0	0.0308019	0.604582	1.47108
