# Supplementary material for: Transcriptome Screening of Long Noncoding RNAs and Their Target Protein-Coding Genes Unmasks a Dynamic Portrait of Seed Coat Coloration Associated with Anthocyanins in Tibetan Hulless Barley
Source: Int J Mol Sci. 2023 Jun 24;24(13):10587. doi: 10.3390/ijms241310587 (PMC10341697; doi:10.3390/ijms241310587)
Supplement: Supplementary file 1 [file ijms-24-10587-s001.zip › Table S11. Trans-regulated lncRNAs and their co-expressed transcription factors in the colour-forming module.xlsx]

## Sheet: Sheet1
Table S11. Trans-regulated lncRNAs and their co-expressed transcription factors in the colour-forming module.
TFs ID	Trans-regulated lncRNAs
D1007_01080	TCONS_00196859
D1007_01505	TCONS_00196859
D1007_03962	TCONS_00196859
D1007_01268	TCONS_00196850
D1007_57656	TCONS_00196850
D1007_11846	TCONS_00191900
D1007_54594	TCONS_00191900
D1007_01080	TCONS_00191220
D1007_03962	TCONS_00191220
D1007_12860	TCONS_00191220
D1007_17394	TCONS_00191220
D1007_41911	TCONS_00191220
D1007_05743	TCONS_00190052
D1007_12860	TCONS_00190052
D1007_01080	TCONS_00182993
D1007_12860	TCONS_00182993
D1007_01505	TCONS_00178259
D1007_03962	TCONS_00178259
D1007_49758	TCONS_00172467
D1007_57656	TCONS_00168130
D1007_11846	TCONS_00162099
D1007_16654	TCONS_00162099
D1007_54594	TCONS_00162099
D1007_49758	TCONS_00158727
D1007_03962	TCONS_00152470
D1007_17394	TCONS_00152470
D1007_02027	TCONS_00147801
D1007_11846	TCONS_00147801
D1007_49933	TCONS_00147801
D1007_54594	TCONS_00147801
D1007_57656	TCONS_00147801
D1007_01080	TCONS_00143727
D1007_12448	TCONS_00143727
D1007_16654	TCONS_00139692
D1007_49933	TCONS_00139692
D1007_54594	TCONS_00139692
D1007_49758	TCONS_00119199
D1007_01505	TCONS_00114501
D1007_41911	TCONS_00114501
D1007_01505	TCONS_00111385
D1007_01268	TCONS_00111333
D1007_44682	TCONS_00111333
D1007_49933	TCONS_00111333
D1007_54594	TCONS_00111333
D1007_57656	TCONS_00111333
D1007_01080	TCONS_00104344
D1007_01505	TCONS_00104344
D1007_03962	TCONS_00104344
D1007_41911	TCONS_00104344
D1007_11846	TCONS_00099041
D1007_54594	TCONS_00099041
D1007_36621	TCONS_00098063
D1007_44682	TCONS_00094516
D1007_05743	TCONS_00090364
D1007_12860	TCONS_00090364
D1007_05743	TCONS_00089465
D1007_12860	TCONS_00089465
D1007_12448	TCONS_00086178
D1007_49933	TCONS_00086178
D1007_57656	TCONS_00086178
D1007_12448	TCONS_00068037
D1007_49758	TCONS_00064809
D1007_46772	TCONS_00057949
D1007_49933	TCONS_00057949
D1007_54594	TCONS_00057949
D1007_57656	TCONS_00057949
D1007_01268	TCONS_00055228
D1007_44682	TCONS_00055228
D1007_54594	TCONS_00055228
D1007_57656	TCONS_00055228
D1007_41911	TCONS_00049334
D1007_02027	TCONS_00037967
D1007_17394	TCONS_00037967
D1007_16654	TCONS_00023174
D1007_01080	TCONS_00021802
D1007_01505	TCONS_00021802
D1007_03962	TCONS_00021802
D1007_11846	TCONS_00021802
D1007_12860	TCONS_00021802
D1007_44682	TCONS_00013239
D1007_57656	TCONS_00013239
D1007_16654	TCONS_00012679
D1007_54594	TCONS_00012679
D1007_49758	TCONS_00009381
D1007_05743	TCONS_00008980
D1007_11846	TCONS_00008980
D1007_12860	TCONS_00008980
D1007_54594	TCONS_00008980
